# Supplementary material for: Time-resolved imaging and analysis of the electron beam-induced formation of an open-cage metallo-azafullerene
Source: Springer Nature journal article supplement (doi:10.1038/s41557-023-01261-7), 2023-06-29
Supplement: 41557_2023_1261_MOESM1_ESM.pdf [file 41557_2023_1261_MOESM1_ESM.pdf]

# Time-resolved imaging and analysis of the electron beam-induced formation of an open-cage metallo-azafullerene

---

In the format provided by the authors and unedited

---

## **This PDF file includes:**

Captions for Supplementary Video 1 to 3, Supplementary Synthetic Details, Supplementary Description of Cross-Section Calculation, Supplementary Computational Details, XYZ Coordinates, NMR and MS Spectral Appendix, Supplementary Text, Supplementary Figures 1 to 36, Supplementary Tables 1 to 19, Supplementary References.

## **Other Supplementary Materials for this manuscript include the following:**

Supplementary Video 1 to 3

## **Content**

|     |                                                                             |     |
|-----|-----------------------------------------------------------------------------|-----|
| 1   | CAPTION FOR VIDEOS                                                          | 2   |
| 2   | SYNTHETIC SECTION                                                           | 3   |
| 2.1 | General methods and materials                                               | 3   |
| 2.2 | Synthetic details                                                           | 4   |
| 3   | ELECTRON MICROSCOPY SECTION                                                 | 11  |
| 3.1 | Elastic scattering-induced processes                                        | 11  |
| 3.2 | Inelastic scattering-induced processes                                      | 13  |
| 3.3 | Secondary electron flux                                                     | 15  |
| 3.4 | Supplementary Video 1 – Transformation of 1Pb to Pb@(FP-Pb) and Pb@(FP)     | 16  |
| 3.5 | Supplementary Video 2 – Decomposition of Pb@(FP) under the electron beam    | 19  |
| 3.6 | Supplementary Video 3 – Detachment of empty hemi-FP from graphene monolayer | 22  |
| 3.7 | STEM/EDS analysis                                                           | 26  |
| 4   | COMPUTATIONAL SECTION                                                       | 27  |
| 4.1 | Thermochemical analysis                                                     | 27  |
| 4.2 | Homolytic bond dissociation analysis                                        | 39  |
| 4.3 | Orbital energies of 1 for ionization cross-section                          | 42  |
| 4.4 | Calculated energies for fullerophyrin metal complexes                       | 50  |
| 4.5 | XYZ Coordinates from thermochemistry                                        | 57  |
| 5   | SPECTRAL APPENDIX (NMR, MS)                                                 | 105 |
| 6   | SUPPLEMENTARY REFERENCES                                                    | 125 |

## 1 Caption for Videos

**Supplementary Video 1: Transformation of 1Pb to Pb@(FP-Pb) and Pb@(FP) on graphene.** 80 kV, magnification 1 000 000x,  $t_{\text{exp}} = 500$  ms, drift corrected, bandpass filtered, and contrast corrected. Video displayed at 6 fps, 1-86-Frames. The video displays the motion 3 times faster than the actual recording.

**Supplementary Video 2: Decomposition of Pb@(FP) under the electron beam.** 80 kV, magnification 1 000 000x,  $t_{\text{exp}} = 500$  ms, drift corrected, bandpass filtered, and contrast corrected. Video displayed at 12 fps, 87-200-Frames. The video displays the motion 6 times faster than the actual recording.

**Supplementary Video 3: Detachment of empty hemi-FP from graphene monolayer.** 80 kV, magnification 2 000 000x,  $t_{\text{exp}} = 500$  ms, drift corrected, bandpass filtered, and contrast corrected. Video displayed at 10 fps, 1-140-Frames. The video displays the motion 5 times faster than the actual recording.

## 2 Synthetic Section

### 2.1 General methods and materials

**Chemicals** were purchased from Sigma-Aldrich and used without any further purification. Solvents were distilled prior to usage.  $\text{CH}_2\text{Cl}_2$  was neutralized with  $\text{K}_2\text{CO}_3$  prior to distillation.  $\text{Et}_2\text{O}$  was dried over  $\text{CaH}_2$  and distilled prior to usage. **Reactions** were carried out under a dry  $\text{N}_2$  or Ar atmosphere, using standard Schlenk techniques. Reaction vessels were heated with polymer-coated heat-on blocks from Radleys. Microwave reactions were carried out in a Biotage initiator<sup>+</sup> mono-mode microwave reactor, using the respective reaction vials at a stirring rate of 600 rpm and fixed hold time. **Thin-layer chromatography** (TLC) was performed on Merck silica gel 60 F524, which was detected by UV light (254nm, 366nm). **Column chromatography** was performed on Macherey-Nagel silica gel 60 M (230-400 mesh, 0.04–0.063 mm). **NMR spectroscopy** was performed on a Bruker Avance 400 ( $^1\text{H}$ : 400 MHz,  $^{13}\text{C}$ : 100 MHz) and Bruker Avance 600 Ascend LH with Cryo Probe DCH ( $^1\text{H}$ : 600 MHz,  $^{13}\text{C}$ : 150 MHz). Deuterated solvents were purchased from Sigma Aldrich and used as received. Chemical shifts are referenced to residual solvent peaks or to the deuterated solvent itself ( $\delta$  in parts per million (ppm):  $\text{CDCl}_3$ :  $^1\text{H}$ : 7.24 ppm,  $^{13}\text{C}$ : 77.0 ppm;  $\text{THF-D}_8$ :  $^1\text{H}$ : 1.73 ppm, 3.58 ppm,  $^{13}\text{C}$ : 25.5 ppm, 67.7 ppm. The resonance multiplicities are indicated as “s” (singlet), “d” (doublet), “t” (triplet), “q” (quartet), and “m” (multiplet). Signals referred to as “br s” (broad singlet) are not clearly resolved or significantly broadened. **Mass spectrometry** was performed on a Bruker ultrafleXreme spectrometer LDI/MALDI-TOF (nitrogen UV-laser, 337 nm) instrument with (*E*)-2-(3-(4-(*tert*-butyl)phenyl)-2-methylallylidene)-malononitrile (DCTB) as matrices. ESI/APPI-TOF mass spectrometry was carried out on a Bruker maXis 4G UHR TOF MS/MS-spectrometer or a Bruker micrOTOF II focus TOF MS-spectrometer. **IR spectroscopy** was performed on a Bruker FT-IR Tensor 27 and Pike MIRacle ATR unit. The ATR unit was equipped with a diamond crystal plate and a high-pressure clamp. Spectra were recorded as solid samples directly from the diamond crystal. All absorptions  $\tilde{\nu}$  are given in wave numbers [ $\text{cm}^{-1}$ ]. **UV/vis spectroscopy** was carried out on a Varian Cary 5000 UV-Vis-NIR spectrometer, and **fluorescence spectroscopy** was performed on a Shimadzu RF-5301PC spectrofluorophotometer. Spectra were recorded at room temperature using quartz cuvettes with a light-path length of 1 cm.

## 2.2 Synthetic details

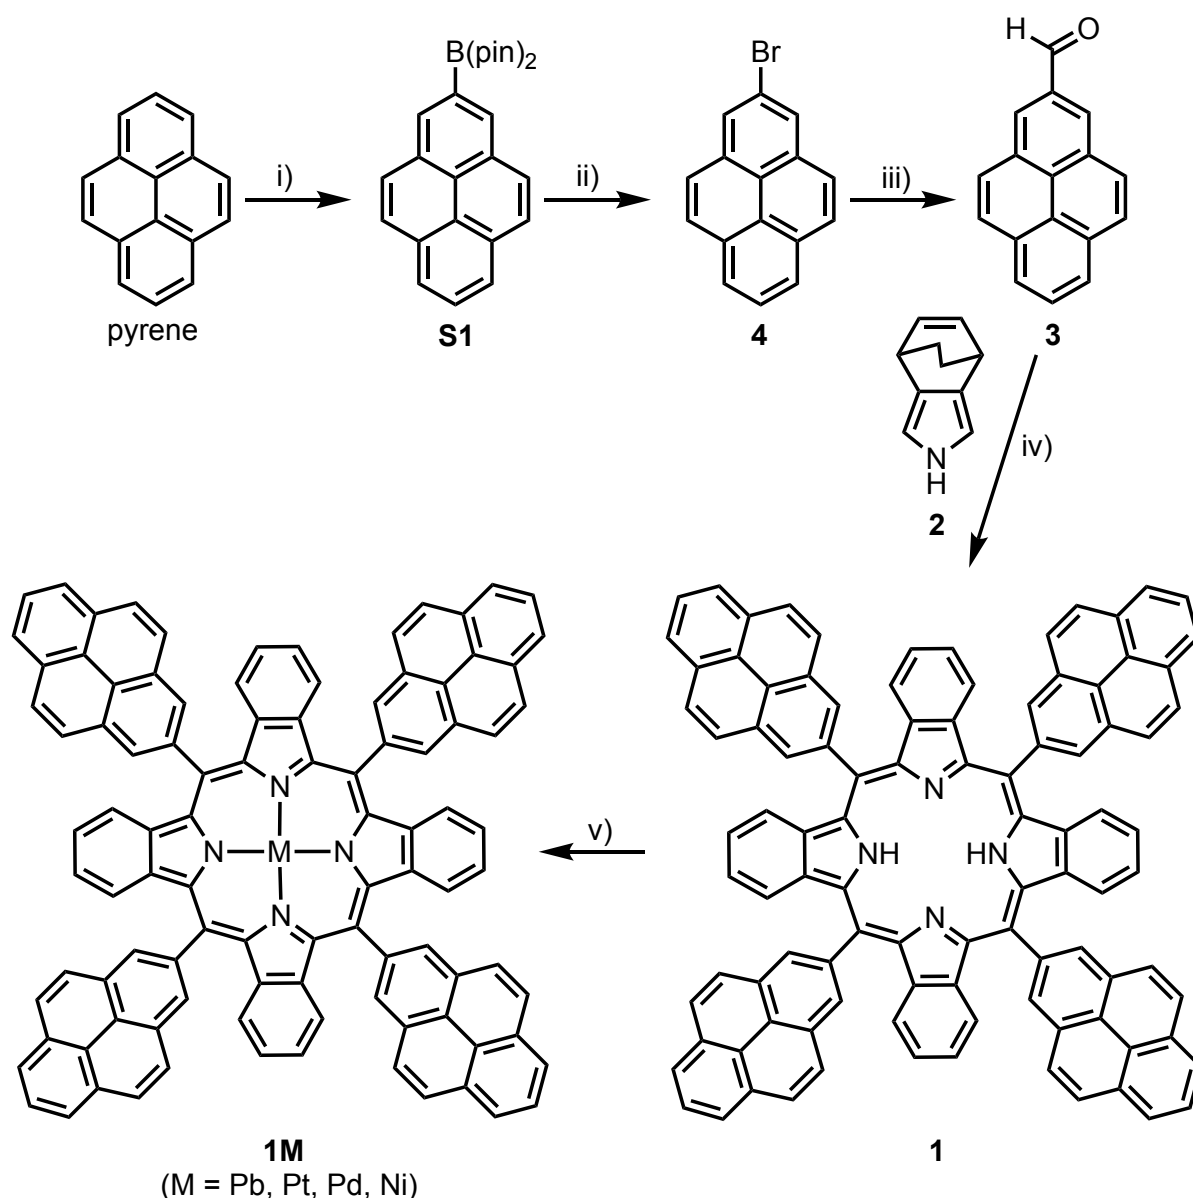

**Supplementary Fig. 1. Synthetic scheme to benzoporphyrin 1M.** i)  $B_2\text{pin}_2$  (1.1 equiv),  $[\{\text{Ir}(\mu\text{-OMe})\text{cod}\}_2]$  (1 mol%), dtbpy (2 mol%), hexanes,  $80^\circ\text{C}$ , 16 h (**S1** 65%); ii)  $\text{CuBr}_2$  (3.0 equiv),  $\text{MeOH}/\text{H}_2\text{O}$  (1:1),  $90^\circ\text{C}$ , 16 h (**4** 83%); iii) 1.  $n\text{-BuLi}$  (2.2 equiv),  $\text{Et}_2\text{O}$ ,  $-20^\circ\text{C}$ , 1 h, then 30 min, rt; 2. DMF (40 equiv), rt, 1 h; 3. 10% HCl (**3** 53%). iv) 1. 4,7-dihydro-2H-ethanoisindole **2**,  $\text{BF}_3\cdot\text{OEt}_2$ ,  $\text{CH}_2\text{Cl}_2$ , rt, 20 h; 2. DDQ, reflux, 2 h; 3.  $200^\circ\text{C}$ , 1.5 h (**1** 81%); v) **1Pb**:  $\text{Pb}(\text{OAc})_2\cdot 3\text{H}_2\text{O}$  (15 equiv), DMF,  $140^\circ\text{C}$ , 2 h; **1Pt**:  $\text{Pt}(\text{acac})_2$  (15 equiv), PhCN,  $180^\circ\text{C}$ , 3 h; **1Pd**:  $\text{PdCl}_2$  (15 equiv), PhCN,  $180^\circ\text{C}$ , 3 h; **1Ni**:  $\text{Ni}(\text{acac})_2$  (20 equiv), toluene,  $130^\circ\text{C}$ , 1 h.  $B_2\text{pin}_2$  = bis(pinacolato)diboron; cod = cyclooctadiene; dtbpy = 4,4'-di-*tert*-butyl-2,2'-dipyridyl; DMF = *N,N*-dimethylformamide; DDQ = 2,3-dichloro-5,6-dicyano-1,4-benzoquinone; acac = acetylacetonate.

Synthesis of pyrene-2-carbaldehyde 3:

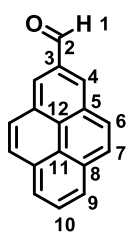

2-Bromopyrene **4** (1.0 g, 3.56 mmol) was suspended in Et<sub>2</sub>O (50 mL) under N<sub>2</sub> in a 250 mL Schlenk flask and cooled to -20 °C (ice water/salt mixture). *n*-BuLi 1.6 M in hexanes (5.0 mL, 8.0 mmol, 2.2 equiv) was added slowly under N<sub>2</sub>, and the reaction mixture was stirred for 1 h at -20 °C. Then the bath was removed and the mixture was stirred for another 30 min at rt. After the addition of DMF (10 mL, 144 mmol, 40 equiv), the mixture was stirred for 1 h at rt. The reaction was quenched carefully with 10% HCl solution, and the organic layer was evaporated. The mixture was extracted with CH<sub>2</sub>Cl<sub>2</sub> (2x150 mL), and the combined organic layers were washed with water (2x150 mL) and brine (150 mL) before they were dried over MgSO<sub>4</sub> and filtered. The solvent was removed by rotary evaporation. The crude product was adsorbed on silica gel and purified via column chromatography (SiO<sub>2</sub>, diameter: 5 cm, height: 30 cm, CH<sub>2</sub>Cl<sub>2</sub>:hexanes = 3:2). The product was isolated as a light-yellow solid in 53% yield (0.43 g, 1.87 mmol).

**R<sub>f</sub>** (SiO<sub>2</sub>): 0.33 (CH<sub>2</sub>Cl<sub>2</sub>:hexanes = 3:2).

**<sup>1</sup>H NMR** (400 MHz, CDCl<sub>3</sub>, rt): δ = 10.4 (s, 1H, 1), 8.58 (s, 2H, 4), 8.20 (d, 2H, <sup>3</sup>J = 7.6Hz, 9), 8.11 (d, 2H, <sup>3</sup>J = 9.2Hz, 6/7), 8.09 (d, 2H, <sup>3</sup>J = 9.3Hz, 6/7), 8.08-8.04 (m, 1H, 10).

**<sup>13</sup>C NMR** (100 MHz, CDCl<sub>3</sub>, rt): δ = 192.9, 133.3, 131.9, 131.3, 128.6, 127.8, 127.7, 127.4, 125.7, 125.5, 124.2.

**HRMS** (APPI, CH<sub>2</sub>Cl<sub>2</sub>/THF): *m/z* calc. for C<sub>17</sub>H<sub>11</sub>O [M+H]<sup>+</sup>: 231.0804; found: 231.0800.

**IR** (ATR, rt):  $\tilde{\nu}$  = 3036, 2360, 2339, 1995, 1694, 1595, 1555, 1451, 1365, 1316, 1277, 1179, 1152, 1130, 982, 964, 874, 841, 821, 760, 708, 686, 587, 549, 526, 507, 490, 470.

## Synthesis of 5,10,15,20-tetrakis(2-pyrenyl)tetrabenzoporphyrin **1**:

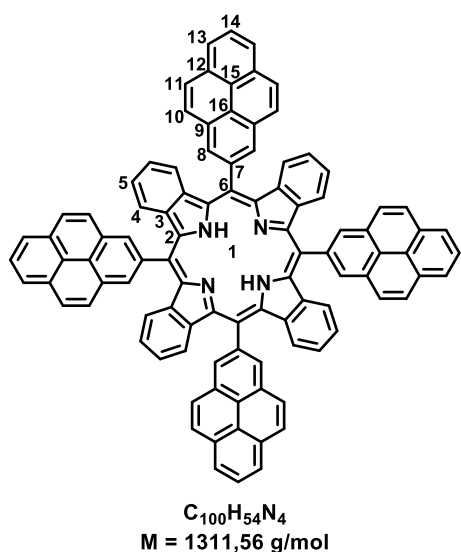

Pyrene-2-carbaldehyde **3** (0.489 g; 2.12 mmol) and 4,7-dihydro-2*H*-ethanoisindole **2** (0.307 g; 2.11 mmol) were dissolved in  $CH_2Cl_2$  (125 mL) in a 250 mL Schlenk flask under  $N_2$ . The solution was purged with  $N_2$  for 15 min before  $BF_3 \cdot OEt_2$  (0.075 mL, 0.61 mmol) was added. The mixture was stirred for 20 h at rt under light exclusion. Then DDQ (0.475 g; 2.09 mmol) was added, and the mixture was brought to reflux for 2 h under  $N_2$ . After cooling to rt, the mixture was washed with a solution of 10%

aqueous  $Na_2SO_3$  (125 mL) and 10%  $Na_2CO_3$  (125 mL). The phases were separated, and the solvent was removed under vacuum. Then the crude product was heated under vacuum to 200 °C for 1.5 h. After cooling to rt, the solid was dissolved in  $CH_2Cl_2$  and purified by plug filtration ( $SiO_2$ , diameter 4 cm; height: 8 cm;  $CH_2Cl_2$  + 1% TFA). The final purification was carried out by recrystallization ( $MeOH/CH_2Cl_2$ ). The product was isolated as a dark-green solid in 81% yield (0.565 g; 0.431 mmol).

$R_f$  ( $SiO_2$ ): 0.88 ( $CH_2Cl_2$ ).

$^1H$  NMR (400 MHz,  $CDCl_3$ , rt):  $\delta$  = 9.30 (s, 8H, 8), 8.37-8.28 (m, 24H, 10, 11, 13), 8.16 (t, 4H,  $^3J$  = 8.0 Hz, 14), 6.76-6.64 (br s, 16H, 4, 5), -0.64 - -0.74 (br s, 2H, 1).

$^1H$  NMR (600 MHz,  $THF-D_8$ , rt):  $\delta$  = 9.32 (s, 8H, 8), 8.40 (d,  $^3J$  = 7.5 Hz, 16H), 8.35 (d,  $^3J$  = 8.8 Hz, 8H), 8.17 (t, 4H,  $^3J$  = 7.8 Hz, 14), 6.73 (br s, 16H, 4, 5), -0.38 - -0.49 (br s, 2H, 1).

$^{13}C$  NMR (100 MHz,  $CDCl_3$ , rt):  $\delta$  = 139.4, 131.7, 131.6, 131.0, 128.3, 128.2, 126.5, 125.9, 125.5, 125.0, 124.9, 124.2, 116.1.

$^{13}C$  NMR (150 MHz,  $THF-D_8$ , rt):  $\delta$  = 140.6, 132.7, 132.6, 131.7, 129.1, 128.7, 127.3, 126.3, 125.7, 125.5, 124.9, 117.1.

MS (MALDI, DCTB):  $m/z$  (rel. Int.) = 1311.4392 [ $M$ ] $^+$  (100).

HRMS (MALDI, DCTB):  $m/z$  calc. for  $C_{100}H_{54}N_4$  [ $M$ ] $^+$ : 1310.4343; found: 1310.4328.

IR (ATR, rt):  $\tilde{\nu}$  = 3035, 2929, 2856, 2090, 1597, 1550, 1447, 1391, 1315, 1258, 1178, 1137, 1121, 1044, 1003, 976, 889, 841, 826, 754, 710, 601, 541, 515, 497, 477, 449.

**UV/Vis** (CH<sub>2</sub>Cl<sub>2</sub>, rt):  $\lambda$  ( $\epsilon$ ) = 246 (122406), 268 (79882), 278 (90161), 311 (49987), 324 (75598), 340 (93691), 472 (302650), 550 (5770), 594 (12137), 644 (31778), 698 (6984).

**Fluo** (CH<sub>2</sub>Cl<sub>2</sub>, rt, 310nm):  $\lambda_{max}$  (rel. int.) = 706 (100), 785 (21); (CH<sub>2</sub>Cl<sub>2</sub>, rt, 320nm):  $\lambda_{max}$  (rel. int.) = 706 (100), 785 (21); (CH<sub>2</sub>Cl<sub>2</sub>, rt, 340nm):  $\lambda_{max}$  (rel. int.) = 705 (100), 787 (20); (CH<sub>2</sub>Cl<sub>2</sub>, rt, 470nm):  $\lambda_{max}$  (rel. int.) = 719 (100), 781 (36).

Synthesis of 5,10,15,20-tetrakis(2-pyrenyl)tetrabenzoporphyrinato-lead(II) **1Pb**:

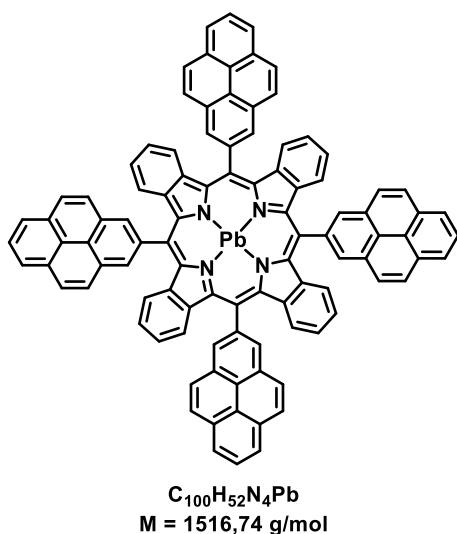

In a flame-dried Schlenk tube, Pb(OAc)<sub>2</sub>·3H<sub>2</sub>O (22 mg; 57  $\mu$ mol, 15 equiv) was dissolved in DMF (1.0 mL) under N<sub>2</sub> and heated to 135 °C for 5 min. 5,10,15,20-tetrakis(2-pyrenyl)tetrabenzoporphyrin **1** (5.0 mg; 3.8  $\mu$ mol) was added, and the mixture was heated to 140 °C for 2 h. The reaction was cooled to rt, and the solvent was removed in vacuum. The crude product was re-dissolved in a small amount of CH<sub>2</sub>Cl<sub>2</sub> and precipitated with MeOH. The precipitate was filtered and washed several times with MeOH. The

brownish, slightly purple product (around 4 mg) was collected and stored in vacuum on a hydrophobic PTFE filter paper, until used for TEM experiments.

**<sup>1</sup>H NMR** (600 MHz, THF-D<sub>8</sub>, rt):  $\delta$  = 9.40 (s, 4H), 9.33 (s, 4H), 8.42-8.39 (m, 16H), 8.36 (d, <sup>3</sup>J = 8.7 Hz, 8H), 8.18 (t, 4H, <sup>3</sup>J = 7.8 Hz, 14), 6.73-6.64 (m, 16H, 4, 5).

**<sup>13</sup>C NMR** (150 MHz, THF-D<sub>8</sub>, rt):  $\delta$  = 161.4, 161.1, 160.9, 145.4, 141.8, 139.8, 132.8, 132.6, 132.5, 132.3, 132.0, 129.1, 128.8, 128.78, 128.73, 128.4, 127.2, 126.2, 126.1, 125.8, 125.4, 125.1, 119.2, 117.7, 98.2, 98.1.

**MS** (MALDI, DCTB):  $m/z$  (rel. Int.) = 1311.4716 [M-Pb+2H]<sup>+</sup> (100), 1516.4201 [M]<sup>+</sup>.

**HRMS** (MALDI, DCTB):  $m/z$  calc. for C<sub>100</sub>H<sub>52</sub>N<sub>4</sub>Pb [M]<sup>+</sup>: 1516.3953; found: 1516.4015.

**UV/Vis** (CH<sub>2</sub>Cl<sub>2</sub>, rt):  $\lambda$  (rel. Int.) = 245 (1.3), 266 (0.98), 277 (0.99), 312 (0.65), 325 (0.94), 341 (1.2), 471 (0.27), 524 (1), 535 (shoulder), 666 (0.18), 709 (0.15).



Synthesis of 5,10,15,20-tetrakis(2-pyrenyl)tetrabenzoporphyrinato-platinum(II) **1Pt**:

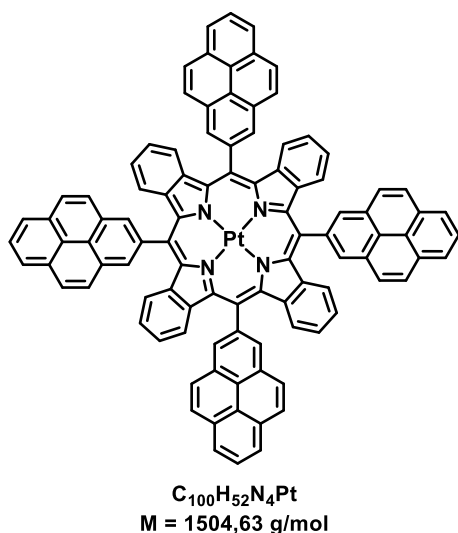

In a flame-dried Schlenk tube  $Pt(acac)_2$  (22.4 mg; 57  $\mu\text{mol}$ , 15 equiv) was dissolved in PhCN (1.5 mL) under  $N_2$  and heated to 180 °C for 15 min. 5,10,15,20-tetrakis(2-pyrenyl)tetrabenzoporphyrin **1** (5.0 mg; 3.8  $\mu\text{mol}$ ) was added, and the mixture was heated to 180 °C for 3 h. The reaction was cooled to rt, and the solvent was distilled off in vacuum. The crude product was re-dissolved in a small amount of  $CH_2Cl_2$  and precipitated with MeOH. The precipitate was filtered and washed several times with MeOH. The

product was isolated as a dark greenish (slightly blue) solid after drying in vacuum, which is greenish/turquoise in  $CH_2Cl_2$  solution. The product (around 4-5 mg) was collected and stored on a hydrophobic PTFE filter paper in vacuum, until used for TEM experiments.

$R_f$  ( $SiO_2$ ): 0.66 (hexanes: $CH_2Cl_2$  = 1:1).

$^1H$  NMR (600 MHz, THF- $D_8$ , rt):  $\delta$  = 9.22 (s, 8H), 8.41-8.35 (m, 24H), 8.18 (t, 4H,  $^3J$  = 7.8 Hz, 14), 6.72-6.70 (m, 8H), 6.56-6.54 (m, 8H).

$^{13}C$  NMR (150 MHz, THF- $D_8$ , rt):  $\delta$  = 140.0, 138.6, 137.4, 132.9, 132.7, 130.9, 129.2, 128.6, 127.3, 126.3, 126.1, 125.7, 125.6, 124.8, 119.7.

MS (MALDI, DCTB):  $m/z$  (rel. Int.) = 1504.4242 [ $M$ ] $^+$  (100) 1311.4683 [ $M-Pt+2H$ ] $^+$  (20).

HRMS (MALDI, DCTB):  $m/z$  calc. for  $C_{100}H_{52}N_4Pt$  [ $M$ ] $^+$ : 1503.3834; found: 1503.3841.

UV/Vis ( $CH_2Cl_2$ , rt):  $\lambda$  (rel. Int.) = 247 (0.79), 269 (0.61), 278 (0.74), 311 (0.30), 324 (0.46), 339 (0.58), 436 (1), 469 (0.29), 568 (0.072), 616 (0.5).

Synthesis of 5,10,15,20-tetrakis(2-pyrenyl)tetrabenzoporphyrinato-palladium(II) **1Pd**:

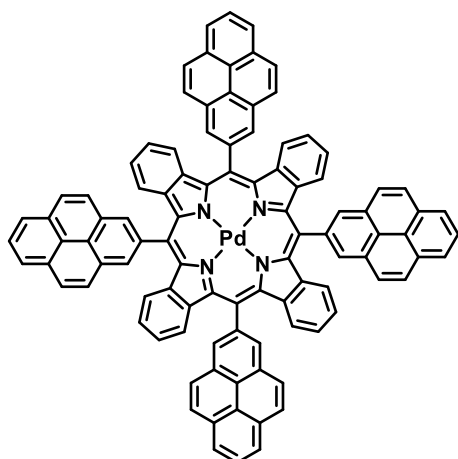

$C_{100}H_{52}N_4Pd$   
 $M = 1415,96 \text{ g/mol}$

In a flame-dried Schlenk tube  $PdCl_2$  (10 mg; 57  $\mu\text{mol}$ , 15 equiv) was dissolved in PhCN (1.5 mL) under  $N_2$  and heated to 180  $^\circ\text{C}$  for 15 min. 5,10,15,20-tetrakis(2-pyrenyl)tetrabenzoporphyrin **1** (5.0 mg; 3.8  $\mu\text{mol}$ ) was added, and the mixture was heated to 180  $^\circ\text{C}$  for 3 h. The reaction was cooled to rt, and the solvent was distilled off in vacuum. The crude product was re-dissolved in a small amount of  $CH_2Cl_2$  and precipitated with MeOH. The precipitate was filtered and washed several times with MeOH. The product was isolated as

a greenish/blueish solid after drying in vacuum, which is green in solution ( $CH_2Cl_2$ ). The product (around 4-5 mg) was collected and stored on a hydrophobic PTFE filter paper in vacuum, until used for TEM experiments.

$R_f$  ( $SiO_2$ ): 0.59 (hexanes: $CH_2Cl_2$  = 1:1).

$^1H$  NMR (600 MHz, THF- $D_8$ , rt):  $\delta$  = 9.26 (s, 8H), 8.45-8.38 (m, 24H), 8.22 (t, 4H,  $^3J$  = 7.8 Hz, 14), 6.77-6.75 (m, 8H), 6.63-6.62 (m, 8H).

$^{13}C$  NMR (150 MHz, THF- $D_8$ , rt):  $\delta$  = 161.4, 161.2, 160.9, 140.2, 139.7, 139.0, 132.82, 132.75, 131.1, 129.2, 128.6, 127.3, 126.3, 126.0, 125.7, 125.6, 124.6, 119.4, 98.2, 98.1.

MS (MALDI, DCTB):  $m/z$  (rel. Int.) = 1414.3523 [ $M$ ] $^+$  (100).

HRMS (MALDI, DCTB):  $m/z$  calc. for  $C_{100}H_{52}N_4Pd$  [ $M$ ] $^+$ : 1414.3221; found: 1414.3224.

UV/Vis ( $CH_2Cl_2$ , rt):  $\lambda$  (rel. Int.) = 248 (0.52), 269 (0.42), 277 (0.45), 311 (shoulder), 324 (0.28), 340 (0.36), 421 (0.20), 448 (1), 583 (0.051), 630 (0.34).

Synthesis of 5,10,15,20-tetrakis(2-pyrenyl)tetrabenzoporphyrinato-nickel(II) **1Ni**:

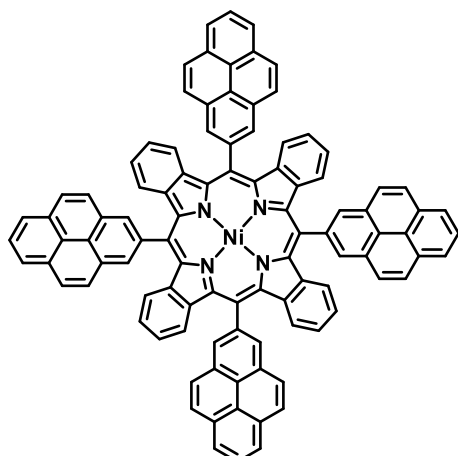

$C_{100}H_{52}N_4Ni$   
 $M = 1368,24 \text{ g/mol}$

In a 5 mL microwave vial  $Ni(acac)_2$  (39 mg; 0.152 mmol, 20 equiv) and 5,10,15,20-tetrakis(2-pyrenyl)tetrabenzoporphyrins **1** (10 mg; 7.6  $\mu\text{mol}$ ) were dissolved in toluene (1.0 mL). The mixture was heated in a microwave reactor: 130 °C, 1 h, low absorption level. The solvent was removed, and the crude product was purified by plug filtration ( $SiO_2$ , diameter: 3.5 cm; height: 10 cm;  $CH_2Cl_2$ ). After removal of the solvent, the product was isolated as a dark green solid in 71% yield (7.4 mg; 5.4  $\mu\text{mol}$ ).

$R_f$  ( $SiO_2$ ): 0.63 (hexanes: $CH_2Cl_2$  = 1:1).

$^1H$  NMR (600 MHz, THF- $D_8$ , rt):  $\delta$  = 9.01 (s, 8H), 8.39-8.30 (m, 24H), 8.16 (t, 4H,  $^3J$  = 7.8 Hz, 14), 6.72-6.70 (m, 8H), 6.62-6.61 (m, 8H).

$^{13}C$  NMR (150 MHz, THF- $D_8$ , rt):  $\delta$  = 140.5, 139.7, 139.1, 132.7, 130.6, 129.0, 128.6, 127.2, 126.2, 125.7, 125.5, 124.03, 124.0, 116.8.

MS (MALDI, DCTB):  $m/z$  (rel. Int.) = 1367.3560  $[M]^+$  (100).

HRMS (MALDI, DCTB):  $m/z$  calc. for  $C_{100}H_{52}N_4Ni$   $[M]^+$ : 1366.3540; found: 1366.3528.

UV/Vis ( $CH_2Cl_2$ , rt):  $\lambda$  (rel. Int.) = 245 (0.77), 268 (0.54), 278 (0.65), 310 (shoulder), 325 (0.44), 340 (0.55), 452 (1), 594 (0.063), 646 (0.35).

## 3 Electron Microscopy Section

### 3.1 Elastic scattering-induced processes

Elastic scattering of electrons is a coherent process and is responsible for phase and Z-contrast in transmission electron microscopy imaging. It occurs without significant energy loss of the primary electron, as opposed to inelastic scattering, in which a substantial amount of energy of the primary electron is transferred to the observed atoms/molecules. The total differential elastic-scattering cross-sections for H, C, N, and Pb at 80 keV are shown in Supplementary Fig. 2.<sup>1</sup>

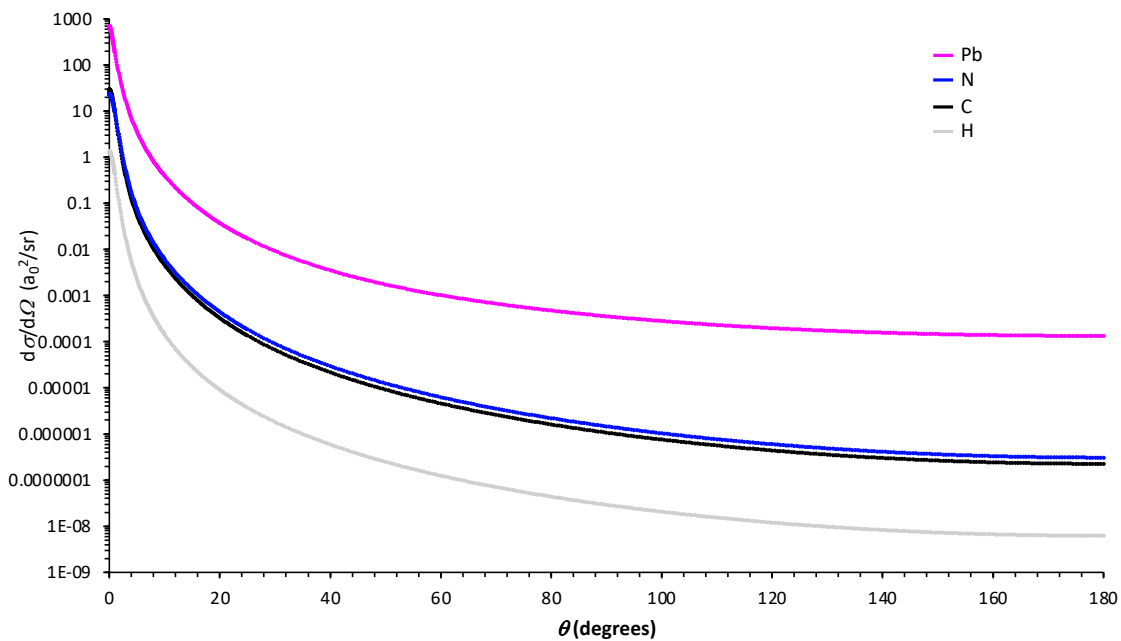

**Supplementary Fig. 2. Differential elastic-scattering cross-section of H, C, N, and Pb at 80 keV.**  $a_0$  = Bohr radius ( $a_0^2 = 2.8002852 \times 10^{-21} \text{ m}^2$ ); Total cross-section: H =  $1.55 \times 10^{-3} a_0^2$ ; C =  $3.42 \times 10^{-2} a_0^2$ ; N =  $3.68 \times 10^{-2} a_0^2$ ; Pb =  $9.56 \times 10^{-1} a_0^2$ .

Elastic scattering of high-energetic primary electrons (e-beam) can lead to a so-called knock-on kinetic energy transfer from the accelerated electron to the nucleus of the atom or molecule. Depending on the amount of transferred energy, derived from the scattering angle  $\theta$ , this can cause bond vibrations or even homolytic bond cleavages in the molecule, called knock-on displacement. The transferrable kinetic energy  $E_T$  from the primary electron beam to the sample is dependent on the kinetic energy of the primary electron  $E_0$ , the atomic mass number  $A$  and the scattering angle  $\theta$ , as described in Supplementary Equation 1.<sup>2</sup>

$$E_T = \frac{E_0 \left(1.02 + \frac{E_0}{106}\right)}{465.7A} \sin^2 \frac{\theta}{2} \quad \text{Supplementary Eq. 1}$$

The maximum transferred energy  $E_{\max}$  is obtained at a scattering angle of  $180^\circ$  (least probable case), which gives  $\sin^2 \frac{\theta}{2} = 1$  (compare Supplementary Equation 2). At 80 kV acceleration voltage, the maximum transferable kinetic energy  $E_{\max}$  for hydrogen is around 187.5 eV, for carbon 15.7 eV, for nitrogen 13.5 eV, and for lead 0.91 eV.

$$E_{\max} = \frac{E_0 \left(1.02 + \frac{E_0}{10^6}\right)}{465.7A} \quad \text{Supplementary Eq. 2}$$

From  $E_{\max}$  and the threshold energy (displacement energy) for a homolytic bond cleavage  $E_d$ , which is further dependent on the binding strength of the atom within the molecule, the smallest electron scattering angle  $\theta_{\min}$  for an irreversible bond dissociation, can be determined in Supplementary Equation 3.

$$\theta_{\min} = 2 \sin^{-1} \left( \sqrt{\frac{E_d}{E_{\max}}} \right) \quad \text{Supplementary Eq. 3}$$

With these intrinsic molecular parameters, the knock-on-induced displacement cross-section  $\sigma_d$  for a physical fragmentation of the molecule can be approximated by the McKinley-Feshbach approximation for light to mid-heavy elements, as described in Supplementary Equation 4.<sup>3</sup>

$$\sigma_d = \int_{E_T > E_d} \sigma(E_T) \frac{4\pi}{E_{\max}} dE_T = 4\pi \left( \frac{Ze^2}{8\pi\epsilon_0\gamma m_e c^2 \beta^2} \right)^2 \left[ \left( \frac{E_{\max}}{E_d} - 1 \right) - \beta^2 \ln \left( \frac{E_{\max}}{E_d} \right) + \pi Z \alpha \beta \left\{ 2 \left( \left( \frac{E_{\max}}{E_d} \right)^{1/2} - 1 \right) - \ln \left( \frac{E_{\max}}{E_d} \right) \right\} \right] \quad \text{Supplementary Eq. 4}$$

The total electron dose ( $TED_{ev}$ ) until an elastic scattering induced displacement event should occur is approximated with Supplementary Eq. 5 and Supplementary Eq. 6.<sup>4</sup>

$$t_d = \frac{1}{jn\sigma_d} \quad \text{Supplementary Eq. 5}$$

$$TED_{ev} = \frac{1}{n\sigma_d} \quad \text{Supplementary Eq. 6}$$

$E_T$ : transferable kinetic energy;  $E_0$ : kinetic energy of primary electron;  $A$ : atomic mass number;  $\theta$ : elastic scattering angle;  $\theta_{\min}$ : minimum scattering angle for knock-on removal;  $E_d$ : threshold displacement energy for knock-on event;  $E_{\max}$ : maximum transferable kinetic energy;  $\sigma_d$ : knock-on displacement cross-section;  $Z$ : nuclear charge;  $\epsilon_0$ : vacuum permittivity ( $55.26349406 \text{ e}^2 \text{ GeV}^{-1} \text{ fm}^{-1}$ );  $m_e$ : mass of electron;  $\gamma$ : Lorentz factor ( $1/\sqrt{1-\beta^2}$ );  $c$ : speed of light;  $\beta$ : relativistic factor for the electron ( $\sqrt{1 - (1 + E_0/m_e c^2)^{-2}}$ );  $\alpha$ : fine structure constant ( $7.2973525693 \cdot 10^{-3}$ );  $j$ : electron flux;  $n$ : number of equivalent atoms;  $t_d$ : time until first knock-on displacement event;  $TED_{ev}$ : total electron dose until first knock-on displacement event occurs.

### 3.2 Inelastic scattering-induced processes

Inelastic scattering is an incoherent process, meaning the scattering occurs with significant energy loss of the primary electron. The total inelastic scattering cross-section is approximately proportional to the nuclear charge  $Z$  and occurs from interactions between the primary electrons with the shell electrons of the specimen (atoms/molecules/substrate). Besides phonon and plasmon excitation, electron-impact ionization of the specimen can occur through inelastic scattering.<sup>5</sup> The total electron-impact ionization cross-section  $\sigma_{rBEB}$  of **1** is shown in Supplementary Fig. 3, and is derived from the Binary Encounter Bethe model (Supplementary Eq. 7), which needs to be modified for electrons  $>20$  keV to the relativistic Binary Encounter Bethe (rBEB) model (Supplementary Eq. 8).<sup>6</sup> Hereby, the cross-section is dependent on the kinetic energy of the primary electron  $E_0$ , the kinetic and potential energy of the electron in the respective orbital  $U$  and  $B$  of the atom/molecule, as well as the orbital occupation number  $N$  (typically  $N = 2$ ). The total ionization cross-section is derived from the sum of all cross-sections of all occupied orbitals.

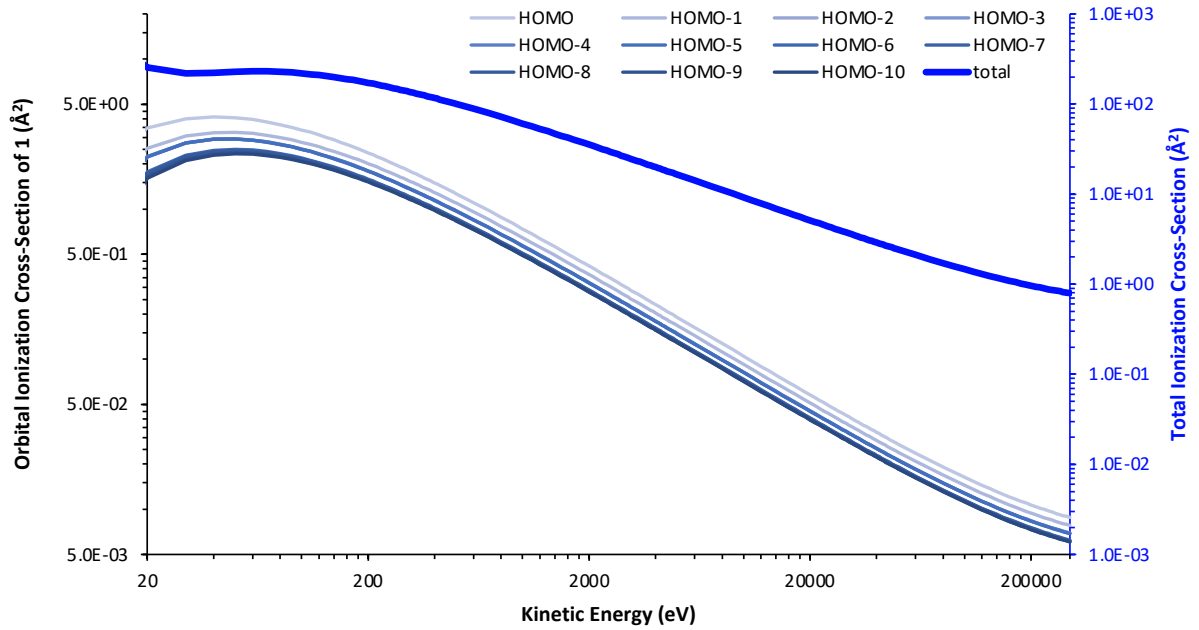

**Supplementary Fig. 3. Electron-impact ionization cross-section of 1.** Calculated with the relativistic Binary Encounter Bethe model for the valence orbitals HOMO – HOMO-10, and the total ionization cross-section over all orbitals.

$$\sigma_{rBEB} = \frac{4\pi a_0^2 N \left(\frac{R}{B}\right)^2}{t+u+1} \left[ \frac{\ln(t)}{2} \left(1 - \frac{1}{t^2}\right) + 1 - \frac{1}{t} - \frac{\ln(t)}{t+1} \right] \quad \text{Supplementary Eq. 7}$$

$$\sigma_{rBEB} = \frac{4\pi a_0^2 \alpha^4 N}{(\beta_t^2 + \beta_u^2 + \beta_b^2) 2b'} \left\{ \frac{1}{2} \left[ \ln \left( \frac{\beta_t^2}{1 - \beta_t^2} \right) - \beta_t^2 - \ln(2b') \right] \left(1 - \frac{1}{t^2}\right) + 1 - \frac{1}{t} - \frac{\ln(t)}{t+1} \frac{1+2t'}{(1+\frac{t'}{2})^2} + \frac{b'^2}{(1+\frac{t'}{2})^2} \frac{t-1}{2} \right\} \quad \text{Supplementary Eq. 8}$$

The variables  $b$ ,  $b'$ ,  $t$ ,  $t'$ ,  $u$ ,  $\beta_b^2$ ,  $\beta_t^2$ , and  $\beta_u^2$  are derived from Supplementary Equations 9 – 16.

$$t = \frac{E_0}{B} \quad \text{Supplementary Eq. 9}$$

$$u = \frac{U}{B} \quad \text{Supplementary Eq. 10}$$

$$\beta_t^2 = 1 - \frac{1}{(1+t')^2} \quad \text{Supplementary Eq. 11}$$

$$t' = \frac{E_0}{m_e c^2} \quad \text{Supplementary Eq. 12}$$

$$\beta_b^2 = 1 - \frac{1}{(1+b')^2} \quad \text{Supplementary Eq. 13}$$

$$b' = \frac{B}{m_e c^2} \quad \text{Supplementary Eq. 14}$$

$$\beta_u^2 = 1 - \frac{1}{(1+u')^2} \quad \text{Supplementary Eq. 15}$$

$$u' = \frac{U}{m_e c^2} \quad \text{Supplementary Eq. 16}$$

$\sigma_{rBEB}$ : ionization cross-section;  $E_0$ : kinetic energy of primary electron;  $B$ : binding energy of the electron in orbital;  $U$ : kinetic energy of the electron in orbital;  $R$ : Rydberg energy (13.6 eV);  $a_0$ : Bohr radius (0.527 Å);  $N$ : orbital occupation number (typically = 2);  $\alpha$ : fine structure constant ( $7.2973525693 \cdot 10^{-3}$ );  $m_e$ : mass of electron;  $c$ : speed of light;  $\beta$ : relativistic factors.

### 3.3 Secondary electron flux

The total ionization cross-section  $\sigma_{ion}$  for atomic carbon calculated with the modified relativistic binary encounter Bethe (MRBEB) model is approximately  $10^{-18} \text{ cm}^{-2}$ .<sup>7</sup> The areal density  $\rho_A$  of carbon atoms in graphene is  $0.382 \text{ \AA}^{-2}$ . The frequency of ionization of carbon atoms under the applied EDR,  $\tau^{-1}$ , can be estimated by  $\tau^{-1} = \sigma j$ , where  $j$  is the electron dose rate in the TEM. The number of electrons ejected from the carbon substrate by ionization, which is the secondary electron flux  $j(SE)$ , can be estimated by  $\tau^{-1} \times \rho_A$  (Supplementary Equation 17).

In our experiments,  $j$  is  $1.5 \times 10^6 \text{ e}^{-}\text{nm}^{-2}\text{s}^{-1}$  and the resulting  $j(SE)$  is approximated to be  $5.72 \times 10^3 \text{ e}^{-}\text{nm}^{-2}\text{s}^{-1}$ .

$$j(SE) = \sigma_{ion} \times j \times \rho_A$$

Supplementary Eq. 17



### 3.4 Supplementary Video 1 – Transformation of 1Pb to Pb@(FP-Pb) and Pb@(FP)

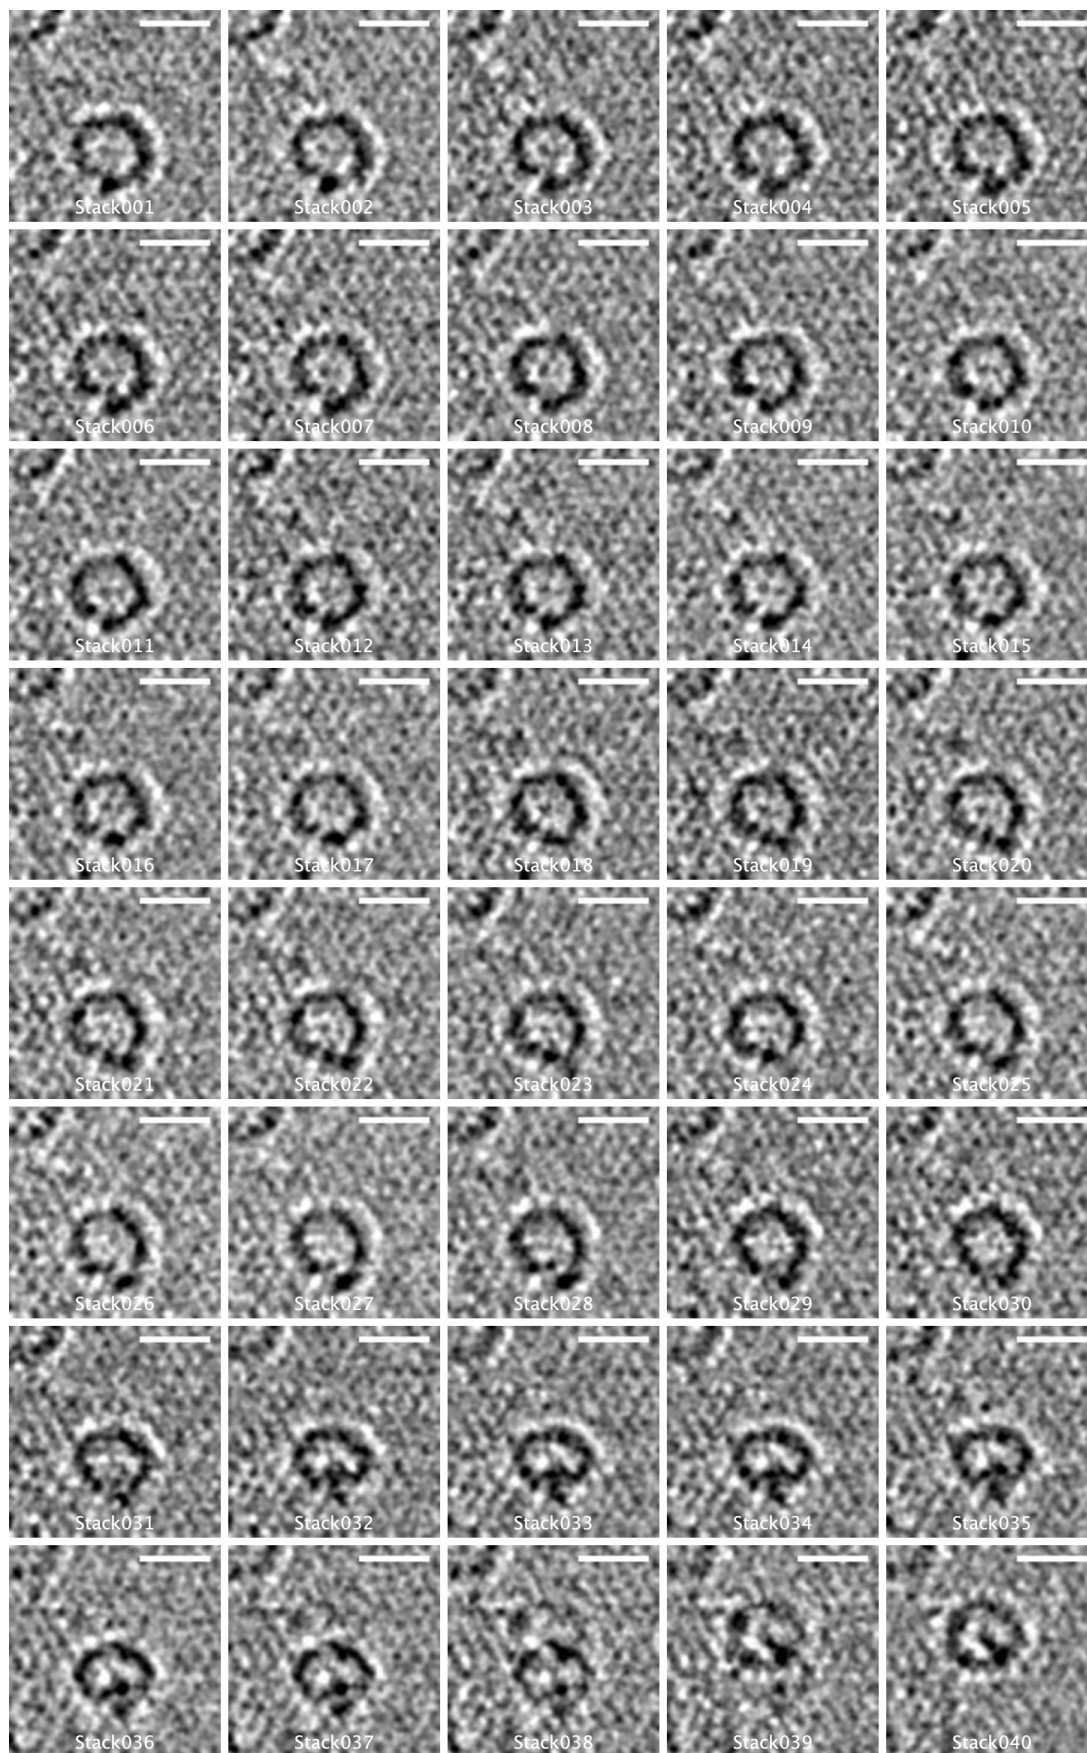

**Supplementary Fig. 4. Supplementary Video 1: SMART-EM video sequence.** Frames 1 – 40, scale bar 1nm.

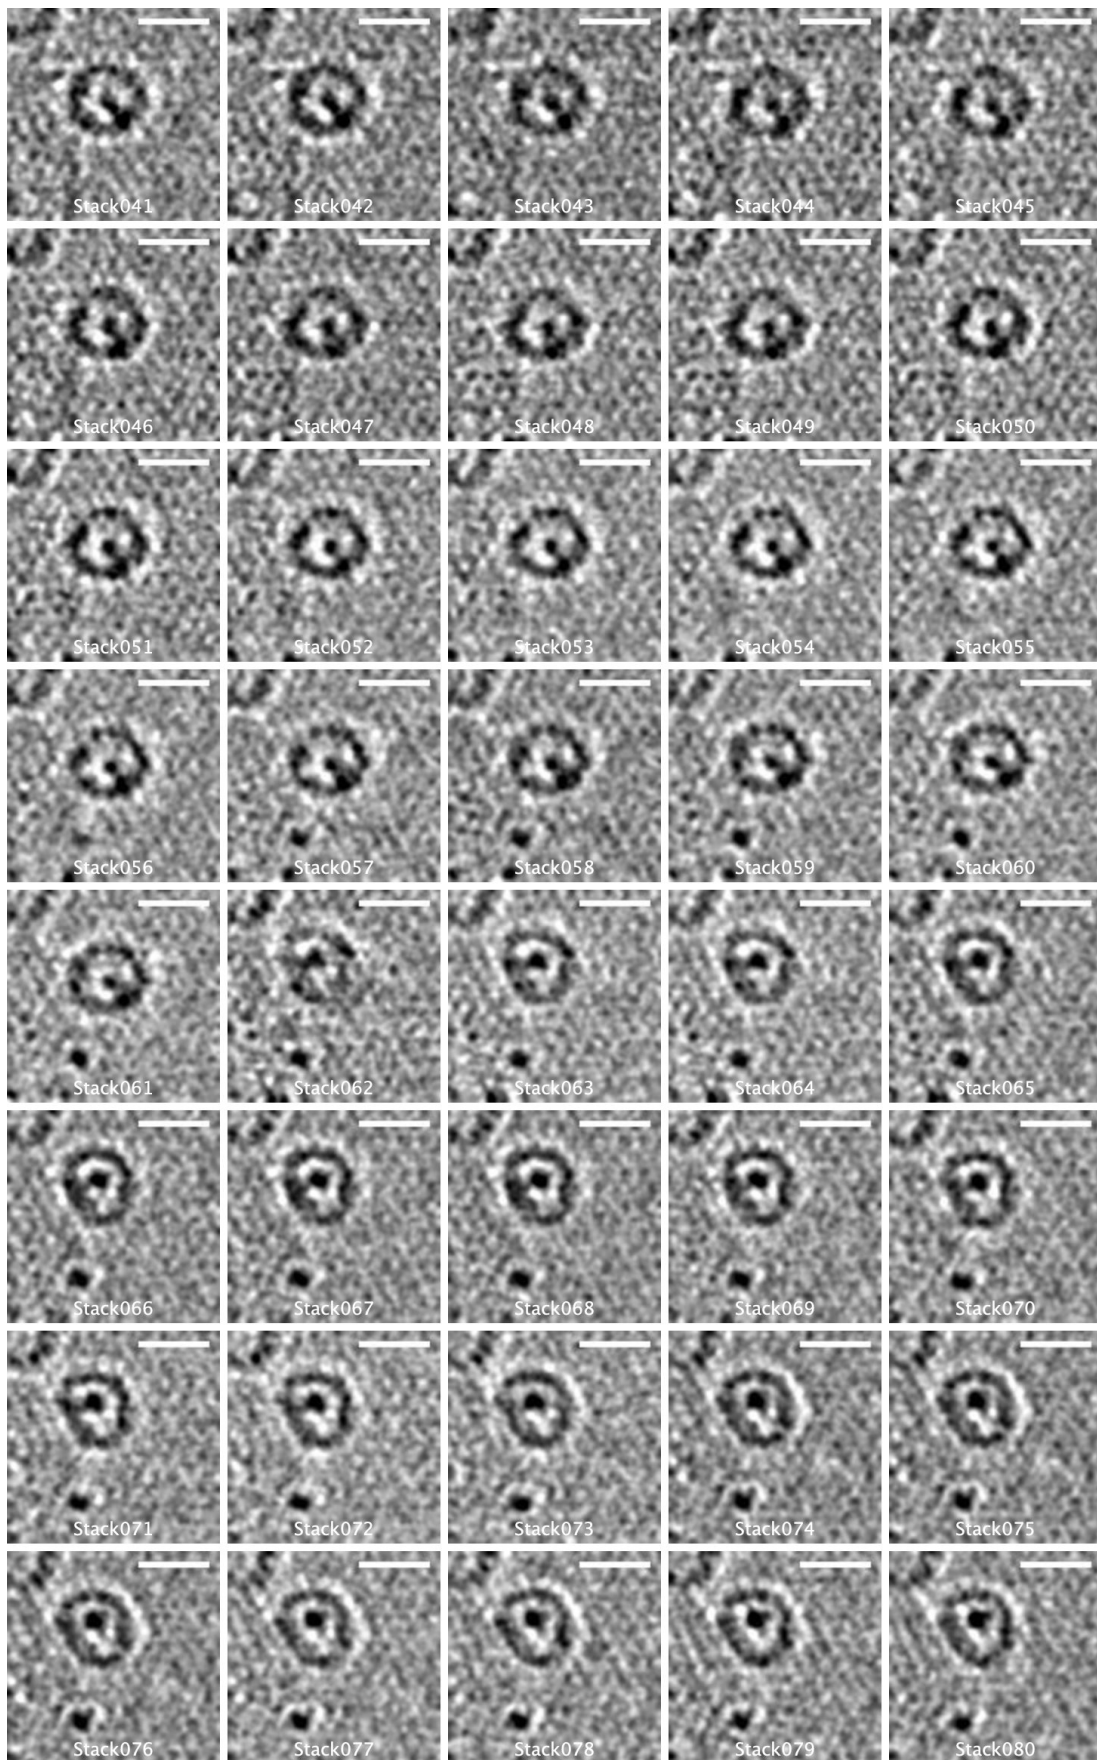

**Supplementary Fig. 5. Supplementary Video 1 (Continued): SMART-EM video sequence. Frames 41 – 80, scale bar 1nm.**

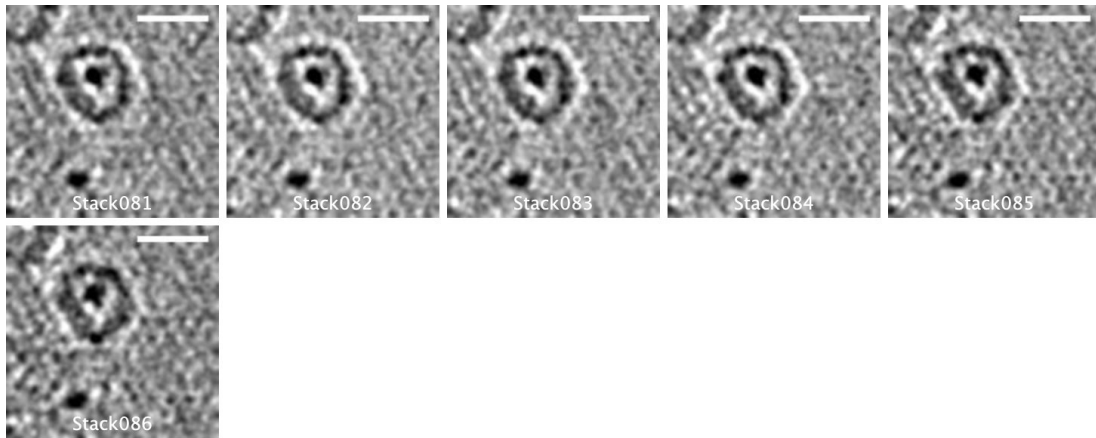

**Supplementary Fig. 6. Supplementary Video 1 (Continued): SMART-EM video sequence.** Frames 81 – 86, scale bar 1nm.

### 3.5 Supplementary Video 2 – Decomposition of Pb@(FP) under the electron beam

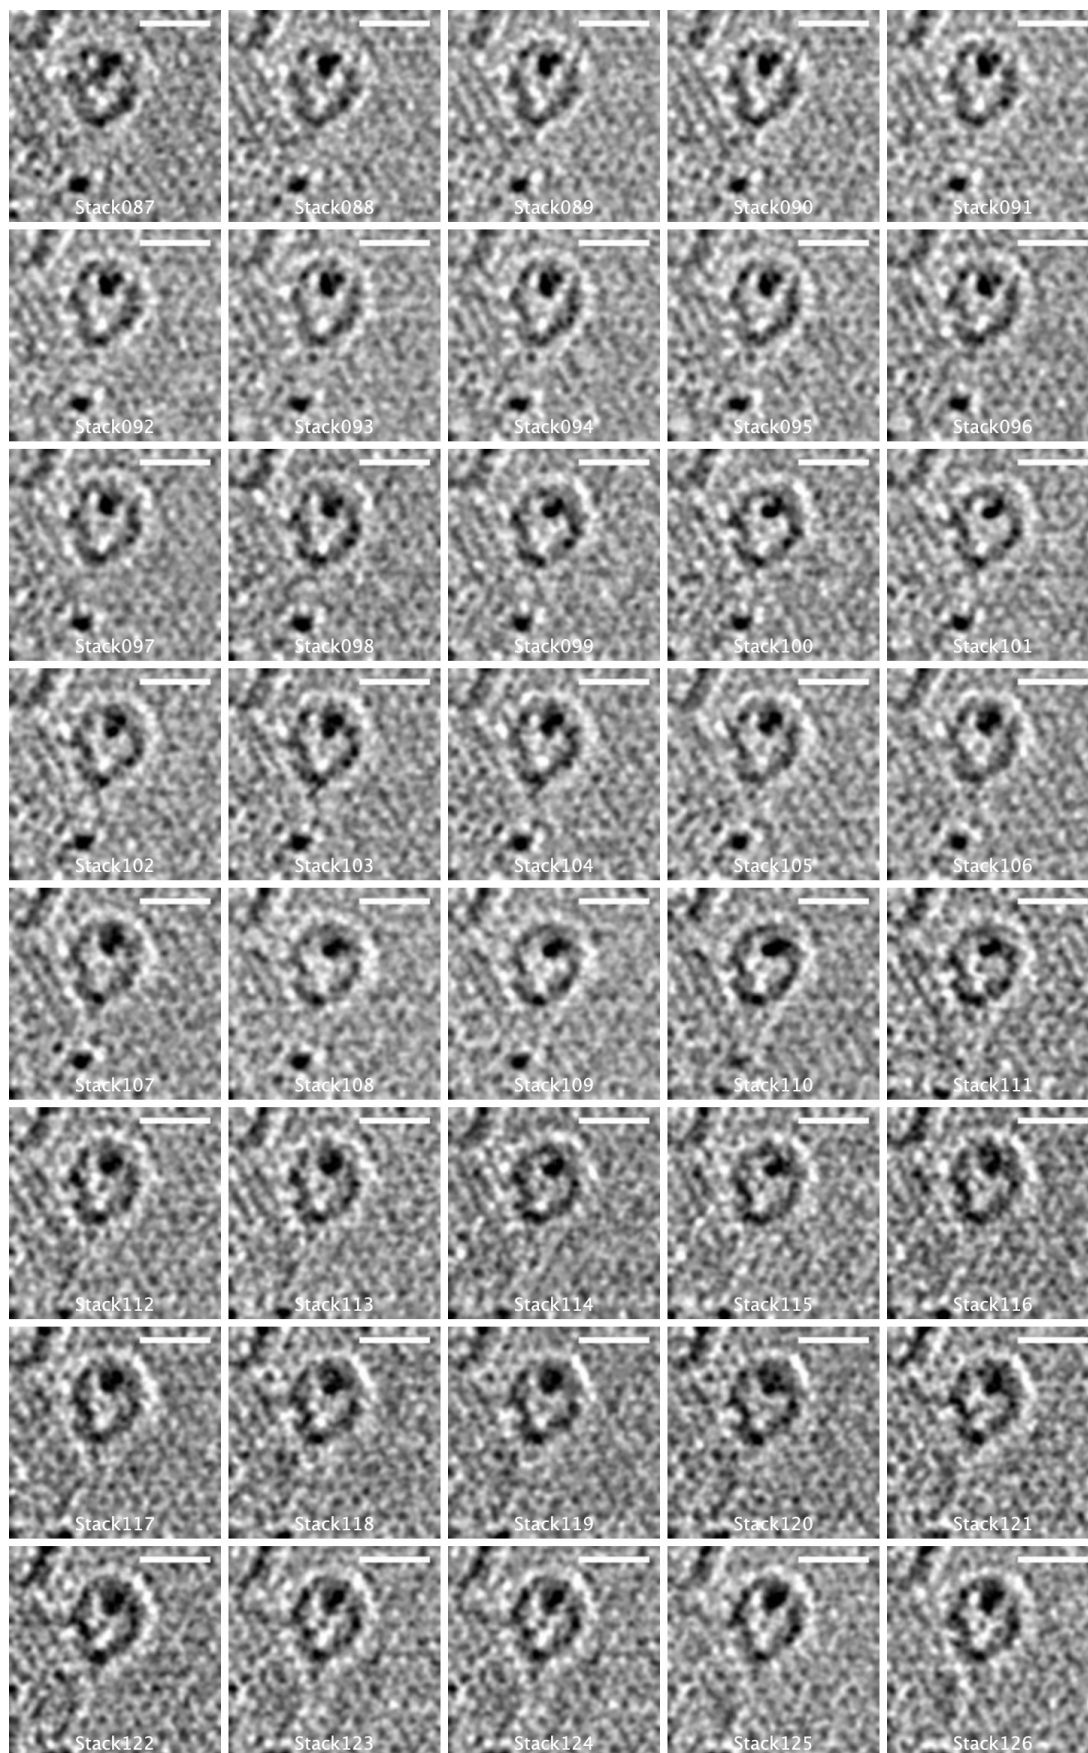

**Supplementary Fig. 7. Supplementary Video 2: SMART-EM video sequence.** Frames 87 –126, scale bar 1 nm.

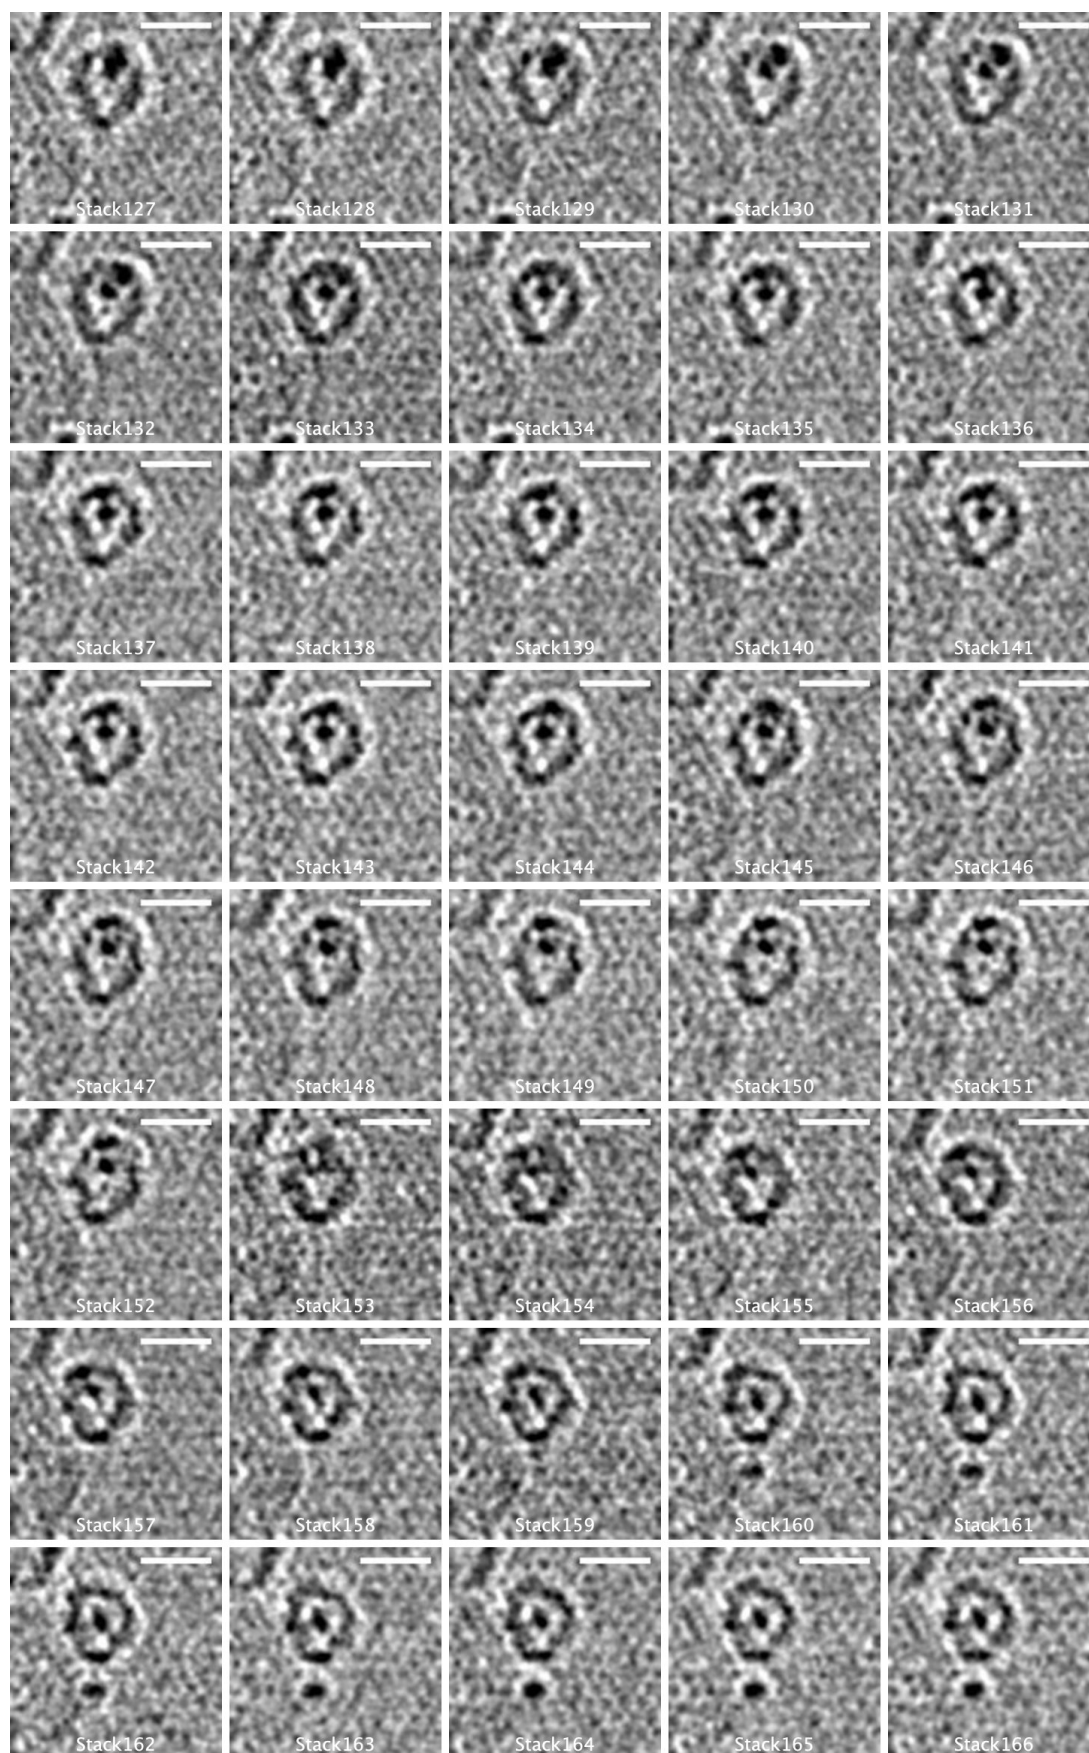

**Supplementary Fig. 8. Supplementary Video 2 (Continued): SMART-EM video sequence. Frames 127 –166, scale bar 1 nm.**

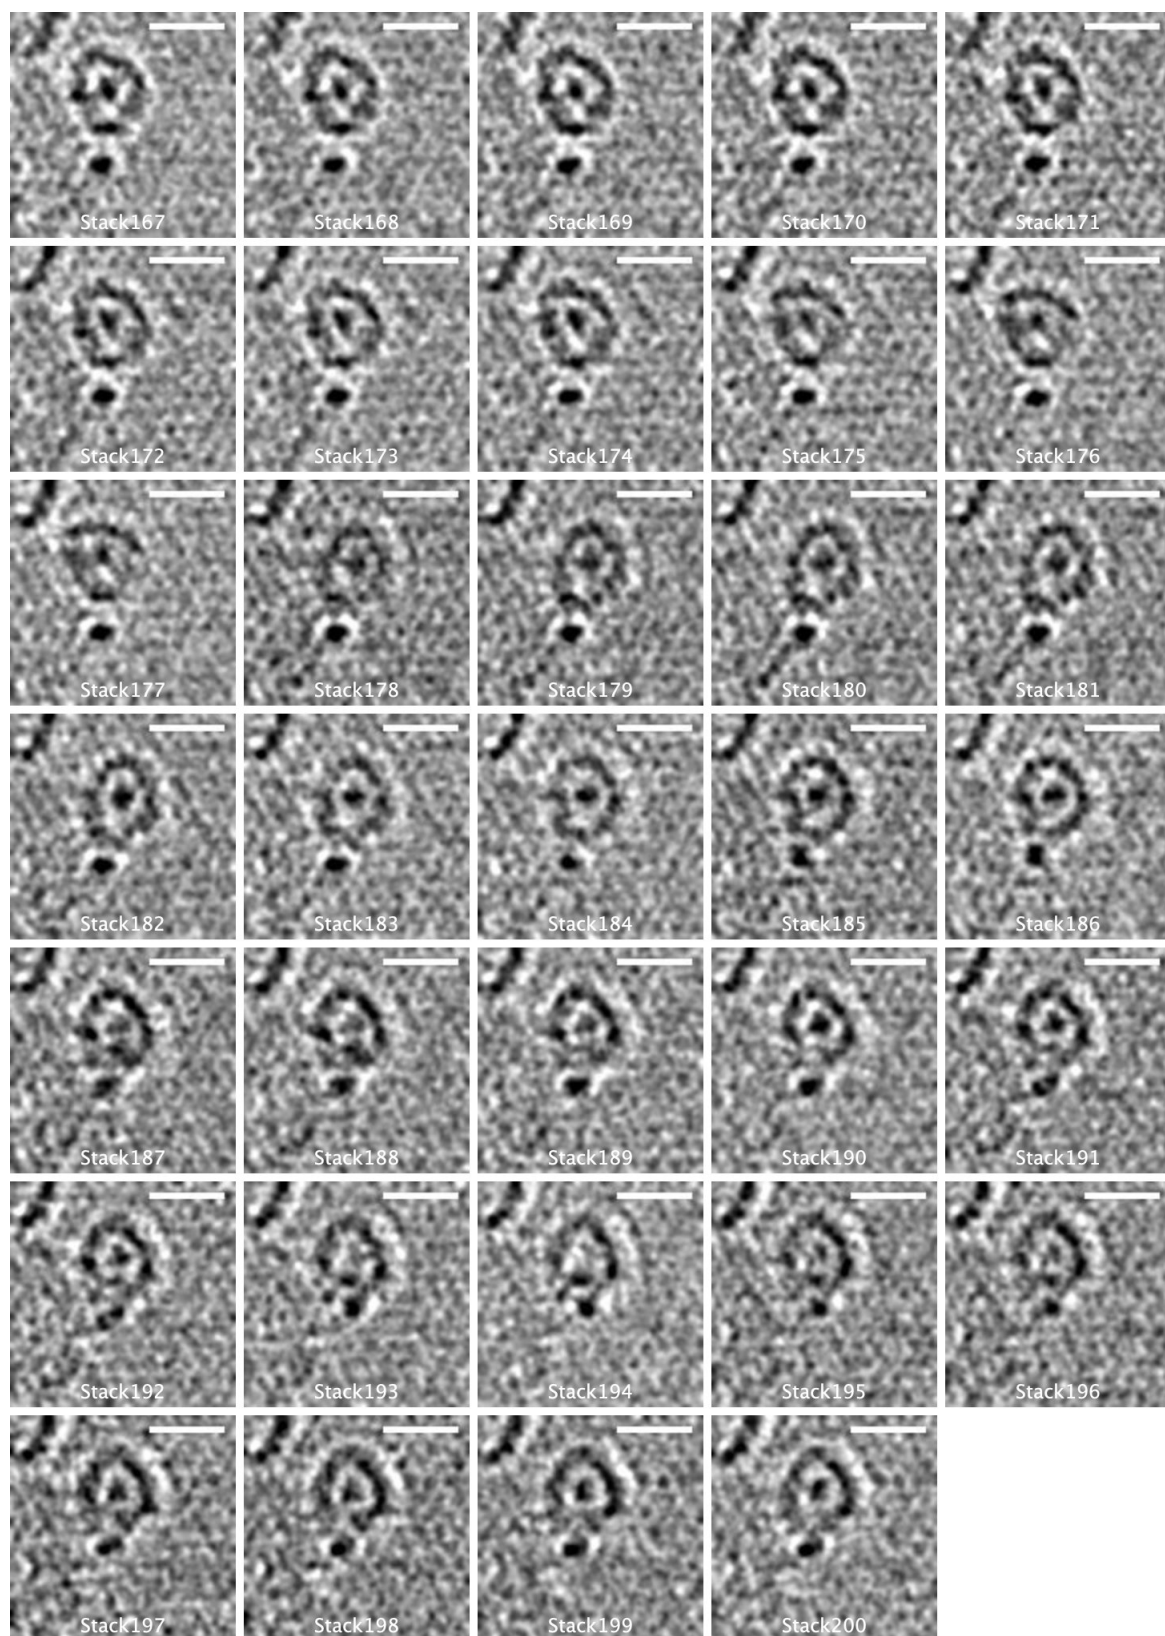

**Supplementary Fig. 9. Supplementary Video 2 (Continued): SMART-EM video sequence. Frames 167 –200, scale bar 1 nm.**

### 3.6 Supplementary Video 3 – Detachment of empty hemi-FP from graphene monolayer

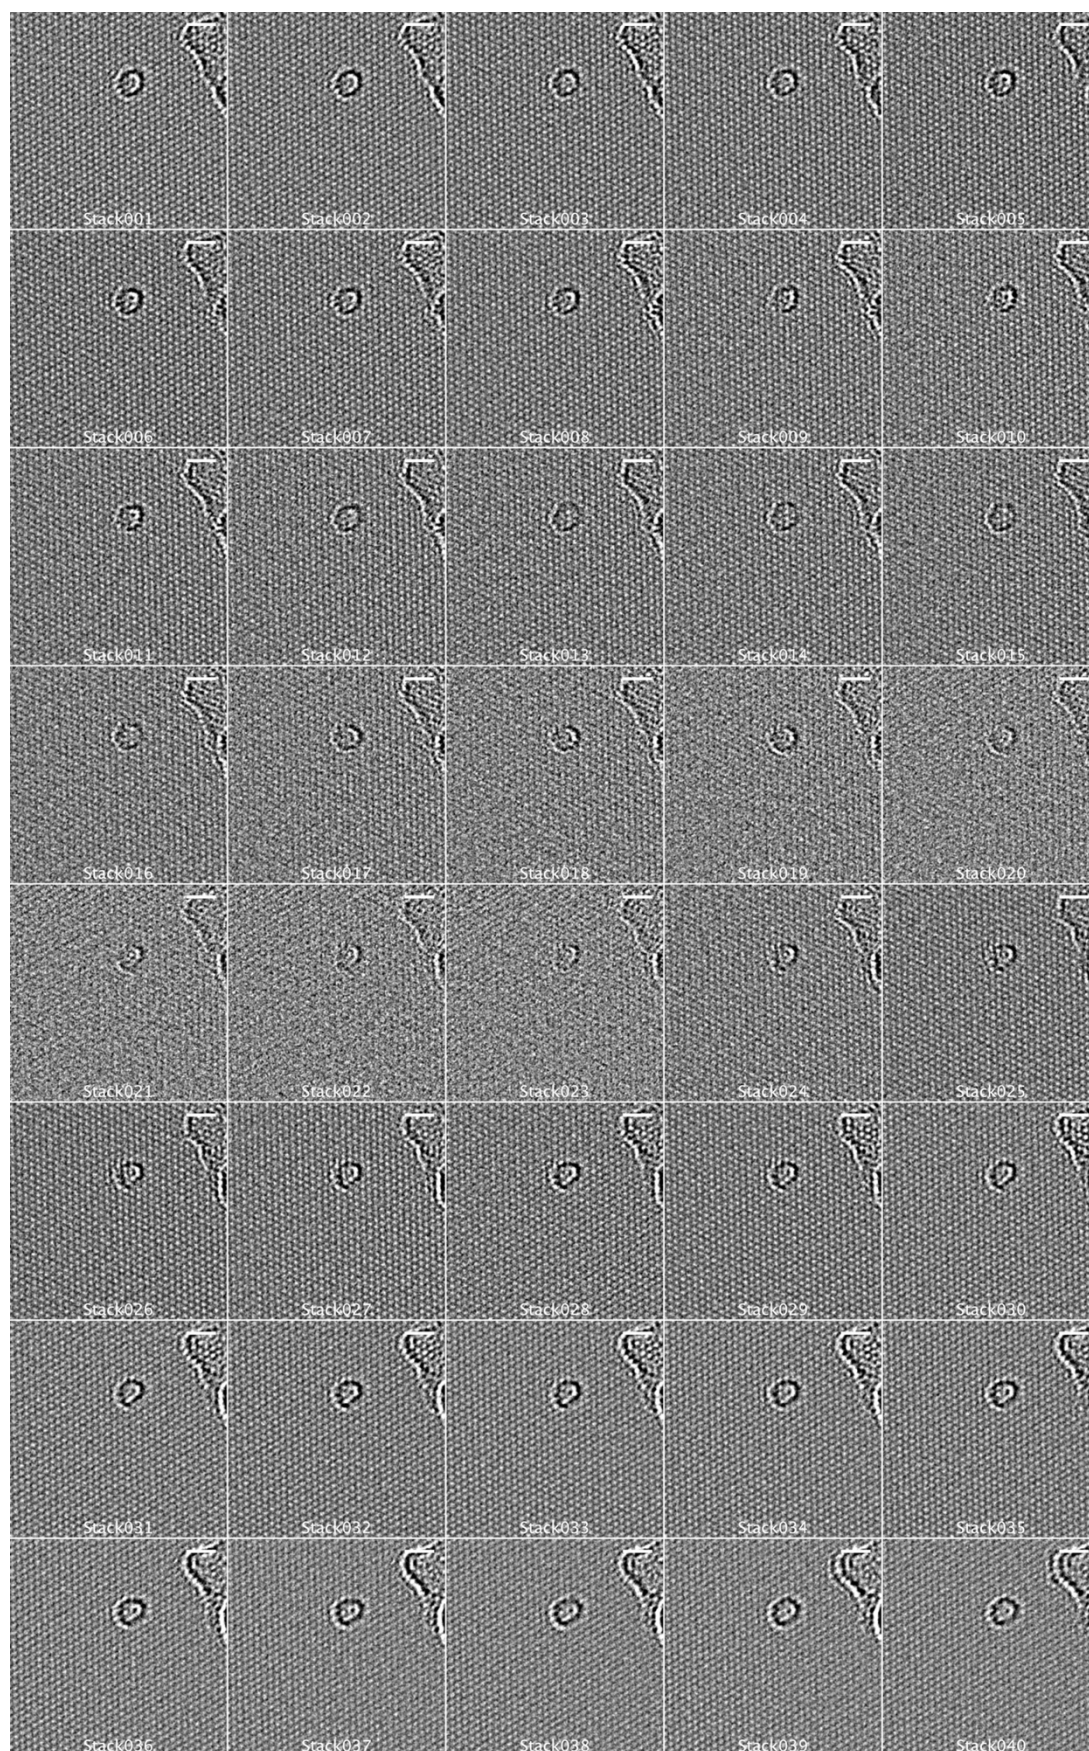

**Supplementary Fig. 10. Supplementary Video 3: SMART-EM video sequence. Frames 1–40, scale bar 1 nm.**

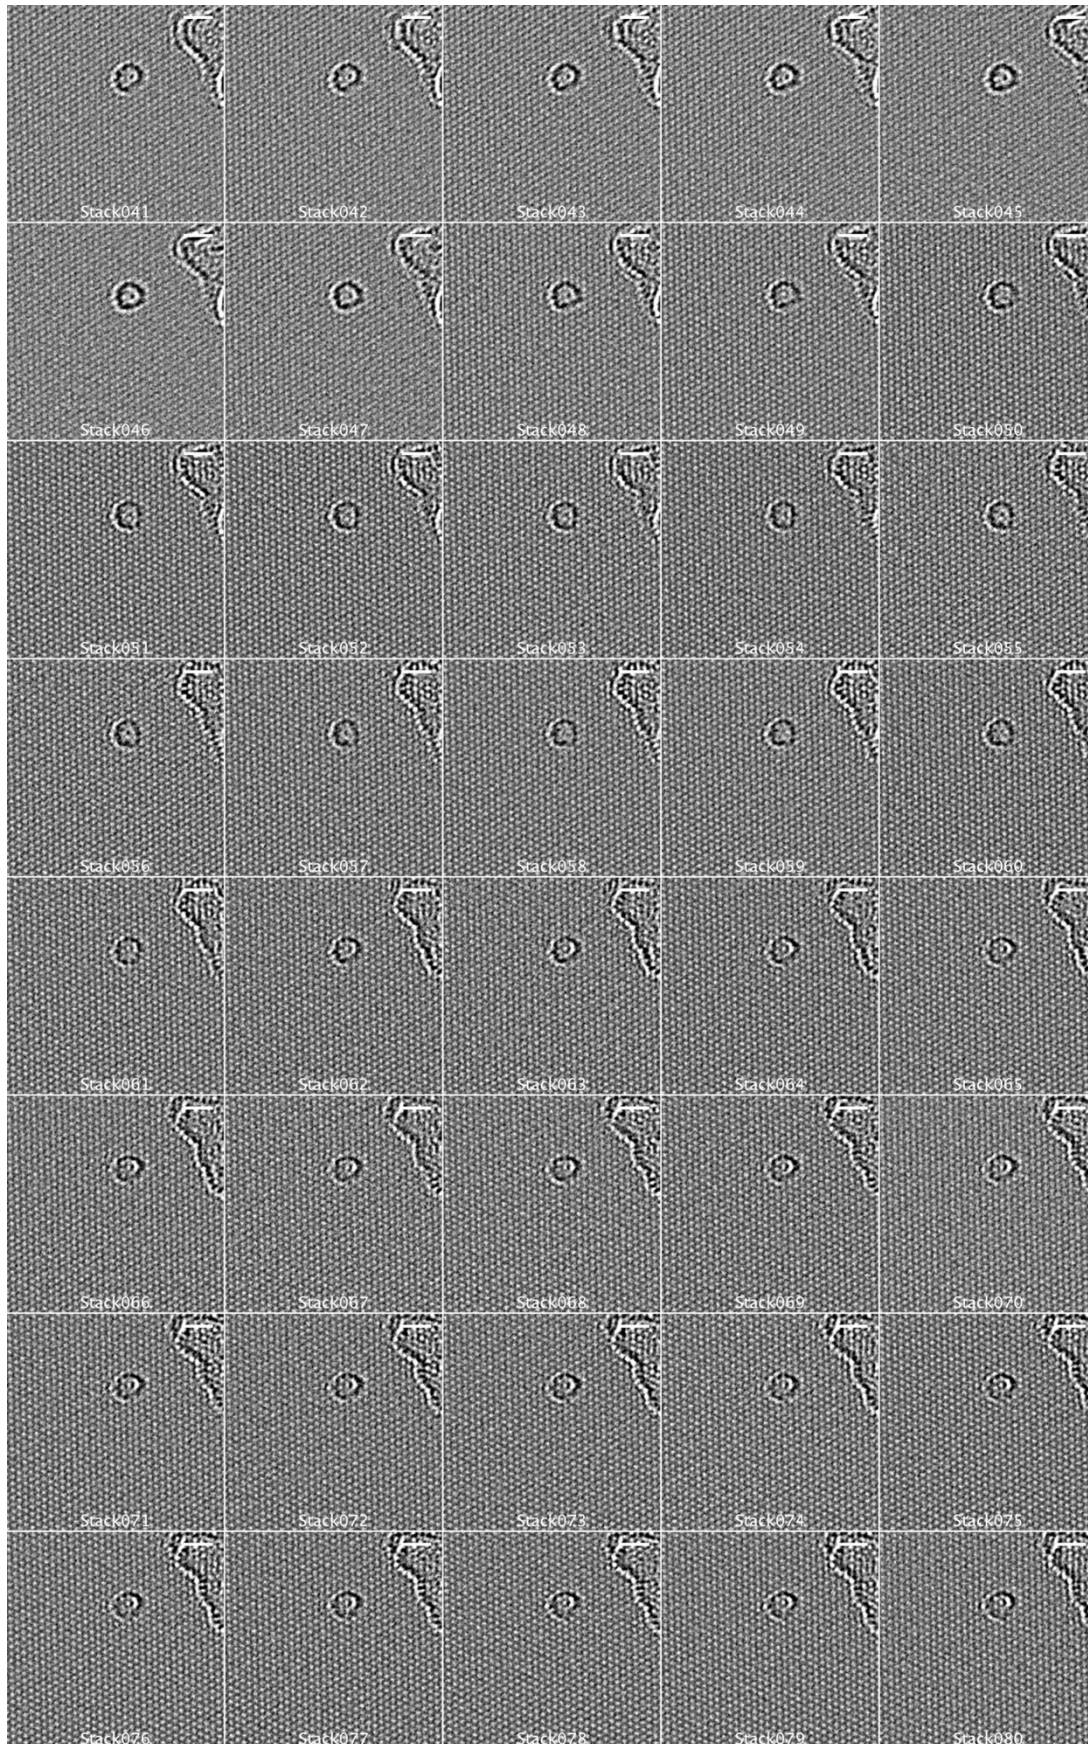

**Supplementary Fig. 11. Supplementary Video 3 (Continued): SMART-EM video sequence.** Frames 41–80, scale bar 1 nm.



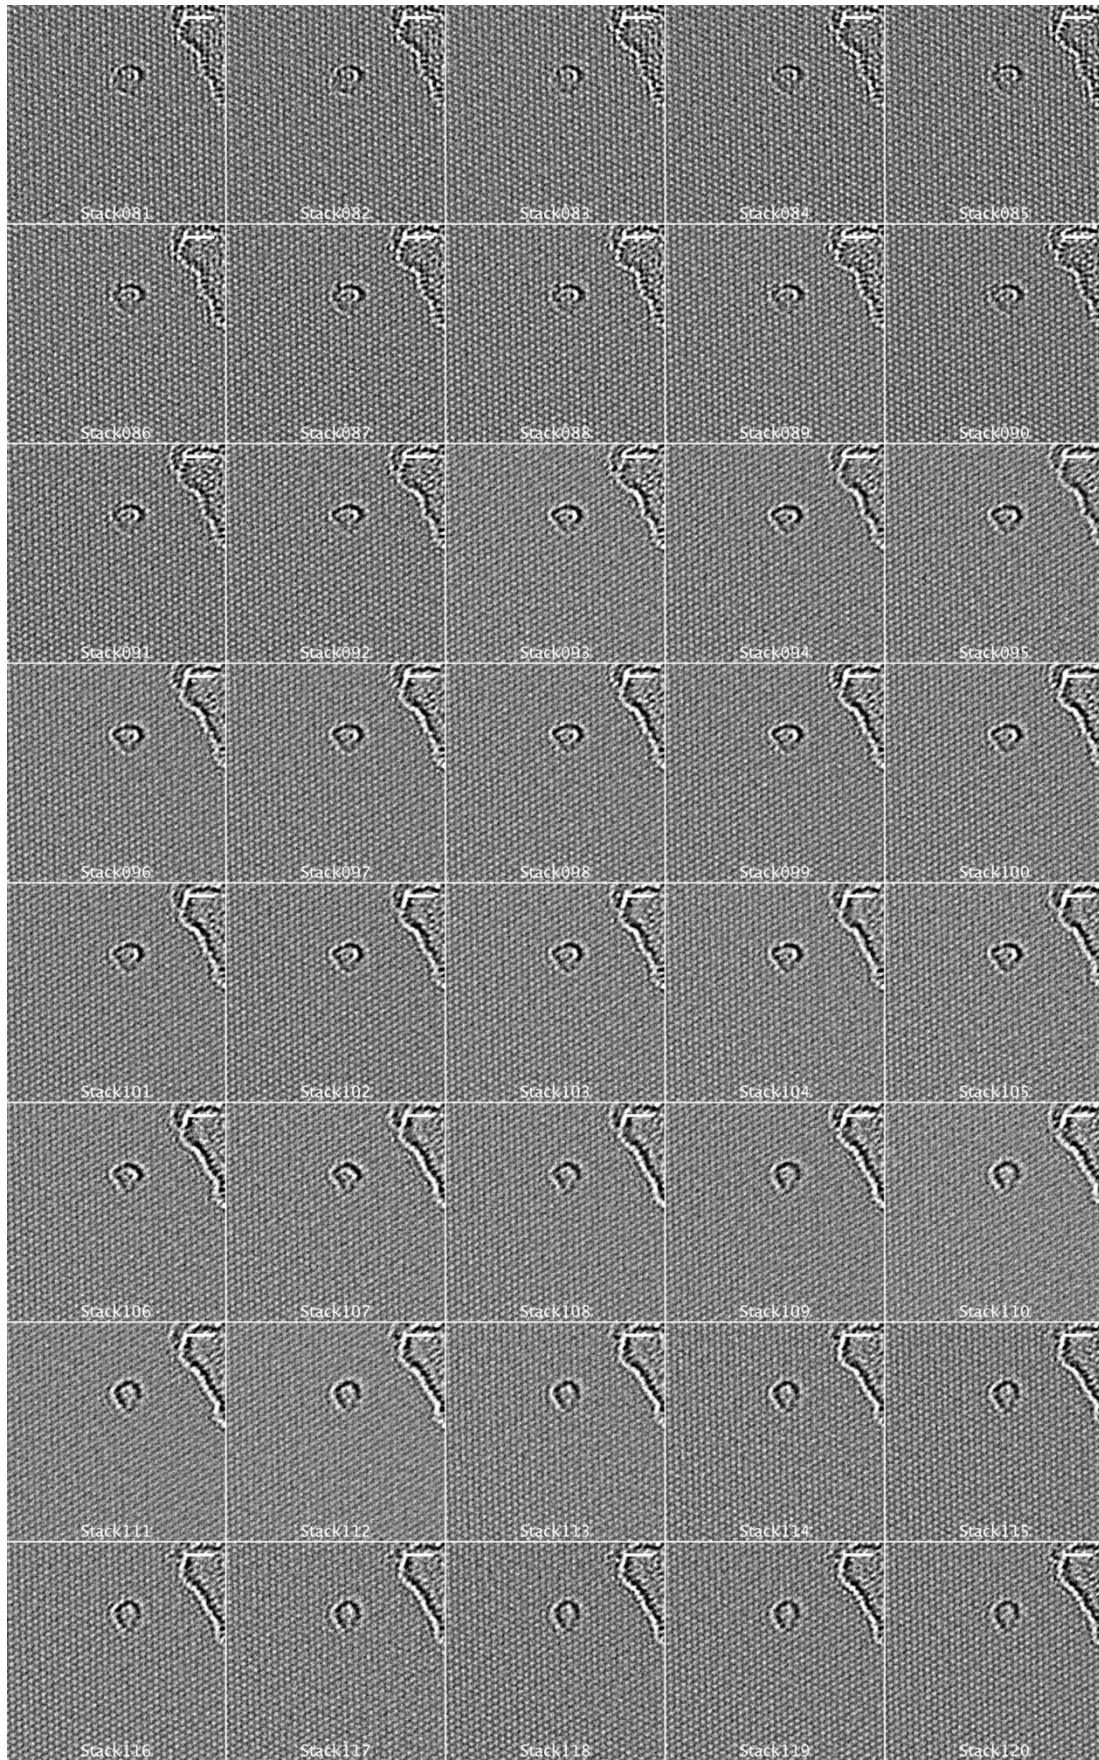

**Supplementary Fig. 12. Supplementary Video 3 (Continued): SMART-EM video sequence.** Frames 81 –120, scale bar 1 nm.

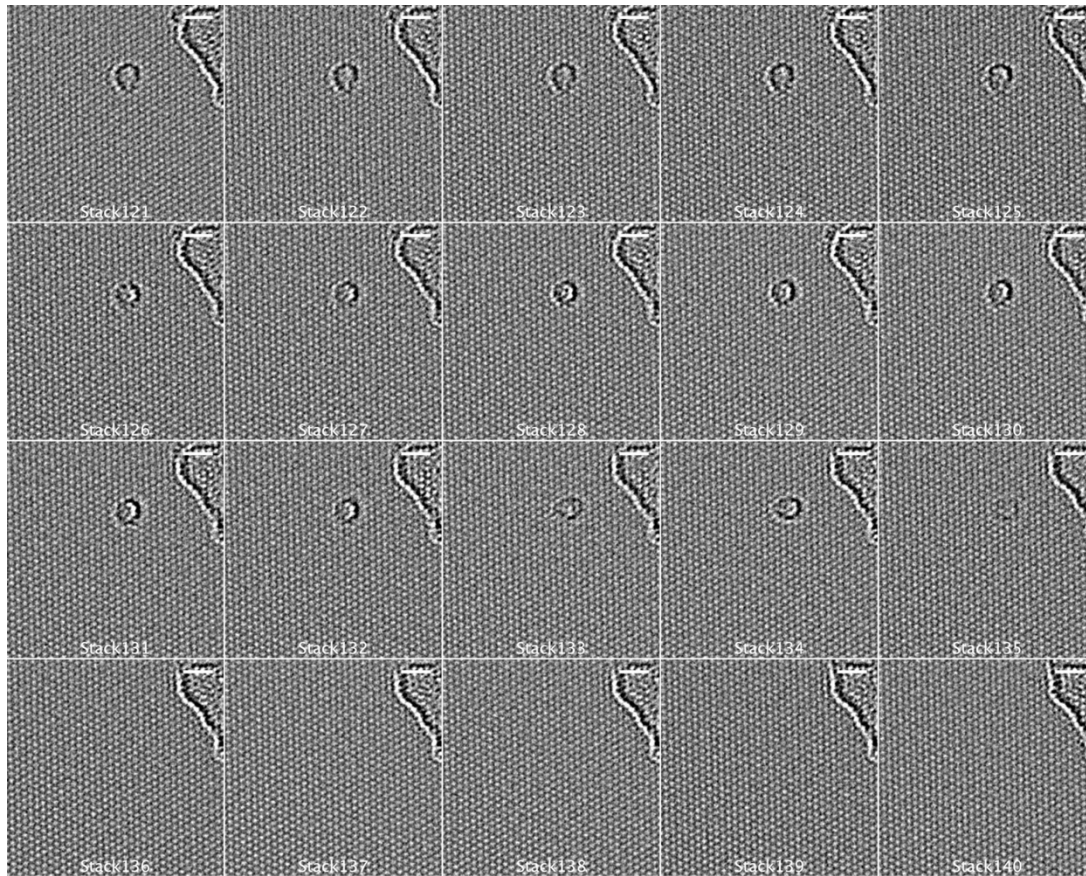

**Supplementary Fig. 13. Supplementary Video 3 (Continued): SMART-EM video sequence.** Frames 121 –140, scale bar 1 nm.

### 3.7 STEM/EDS analysis

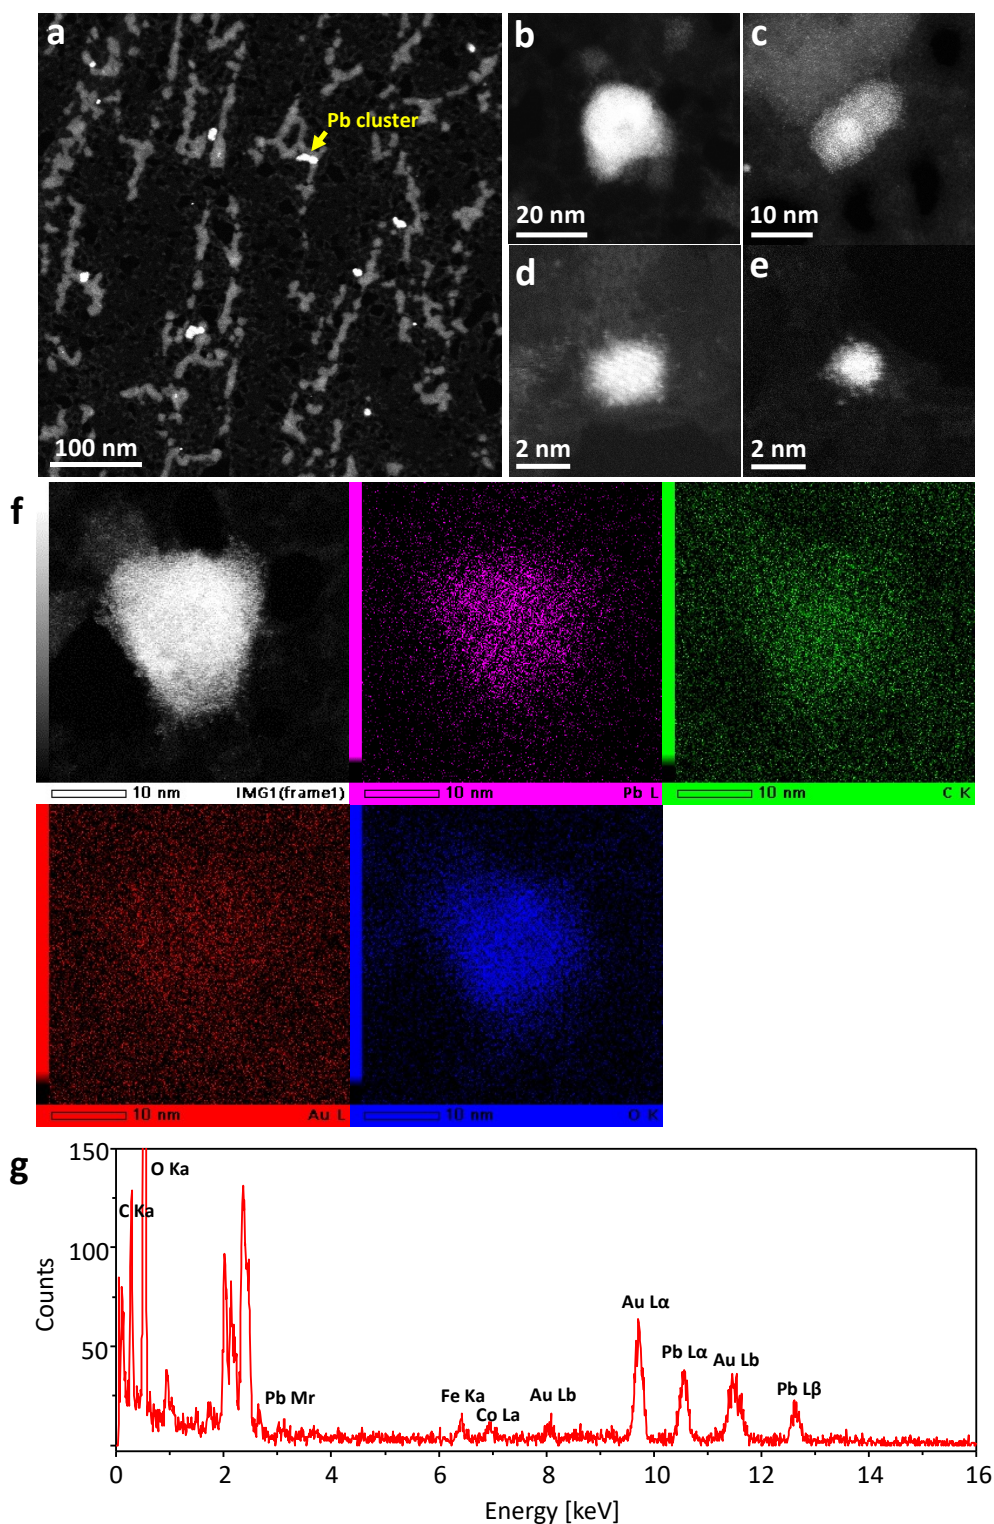

**Supplementary Fig. 14. STEM-EDX analysis of Pb aggregates.** a-e, HAADF-STEM images of the Pb aggregates. f, EDS elemental mapping of Pb. (g) EDX spectrum.

## 4 Computational Section

### 4.1 Thermochemical analysis

**Supplementary Table 1. Comparison of thermochemistry results obtained from different density functionals and basis sets.** Geometry optimization at the  $\omega$ B97X-D/6-31G(d) level of theory.

| -nH <sub>2</sub> | Relative Energy (eV)        |                                |                               |                      | $\Delta$ Energy (eV)        |                                |                               |                      |
|------------------|-----------------------------|--------------------------------|-------------------------------|----------------------|-----------------------------|--------------------------------|-------------------------------|----------------------|
|                  | $\omega$ B97X-D/<br>631G(d) | $\omega$ B97X-D/<br>6311G(d,p) | $\omega$ B97X-D/<br>def2-TZVP | M06-2X/<br>def2-TZVP | $\omega$ B97X-D/<br>631G(d) | $\omega$ B97X-D/<br>6311G(d,p) | $\omega$ B97X-D/<br>def2-TZVP | M06-2X/<br>def2-TZVP |
| 0                | 0.000                       | 0.000                          | 0.000                         | 0.000                | 0                           | 0                              | 0                             | 0                    |
| 1                | 0.564                       | 0.622                          | 0.580                         | 0.546                | 0.564                       | 0.622                          | 0.580                         | 0.546                |
| 2                | 0.887                       | 0.996                          | 0.943                         | 0.804                | 0.323                       | 0.373                          | 0.363                         | 0.258                |
| 3                | 1.450                       | 1.621                          | 1.531                         | 1.322                | 0.563                       | 0.626                          | 0.588                         | 0.518                |
| 4                | 1.621                       | 1.852                          | 1.744                         | 1.441                | 0.171                       | 0.231                          | 0.212                         | 0.118                |
| 5                | 2.544                       | 2.843                          | 2.684                         | 2.308                | 0.923                       | 0.990                          | 0.941                         | 0.868                |
| 6                | 3.517                       | 3.891                          | 3.689                         | 3.163                | 0.972                       | 1.049                          | 1.005                         | 0.854                |
| 7                | 4.615                       | 5.010                          | 4.783                         | 4.219                | 1.099                       | 1.119                          | 1.094                         | 1.057                |
| 8                | 5.522                       | 5.945                          | 5.689                         | 5.081                | 0.906                       | 0.934                          | 0.905                         | 0.862                |
| 9                | 7.265                       | 7.677                          | 7.394                         | 6.779                | 1.743                       | 1.732                          | 1.706                         | 1.699                |
| 10               | 8.717                       | 9.124                          | 8.811                         | 8.233                | 1.452                       | 1.448                          | 1.416                         | 1.454                |
| 11               | 10.592                      | 10.998                         | 10.658                        | 10.079               | 1.875                       | 1.873                          | 1.848                         | 1.846                |
| 12               | 12.211                      | 12.619                         | 12.248                        | 11.700               | 1.619                       | 1.621                          | 1.590                         | 1.621                |
| 13               | 14.311                      | 14.698                         | 14.323                        | 13.772               | 2.100                       | 2.078                          | 2.076                         | 2.073                |
| 14               | 16.275                      | 16.646                         | 16.263                        | 15.687               | 1.964                       | 1.948                          | 1.939                         | 1.911                |
| 15               | 18.201                      | 18.556                         | 18.147                        | 17.619               | 1.926                       | 1.910                          | 1.884                         | 1.933                |
| 16               | 19.993                      | 20.334                         | 19.897                        | 19.376               | 1.792                       | 1.778                          | 1.750                         | 1.757                |
| 17               | 22.448                      | 22.774                         | 22.376                        | 21.840               | 2.455                       | 2.440                          | 2.478                         | 2.464                |
| 18               | 22.527                      | 22.885                         | 22.465                        | 21.847               | 0.079                       | 0.110                          | 0.089                         | 0.007                |
| 19               | 24.770                      | 25.115                         | 24.719                        | 24.076               | 2.243                       | 2.230                          | 2.254                         | 2.229                |
| 20               | 24.931                      | 25.307                         | 24.882                        | 24.165               | 0.161                       | 0.192                          | 0.164                         | 0.089                |
| 21               | 27.855                      | 28.218                         | 27.836                        | 27.155               | 2.924                       | 2.911                          | 2.953                         | 2.990                |
| 22               | 27.989                      | 28.391                         | 27.994                        | 27.227               | 0.134                       | 0.173                          | 0.158                         | 0.071                |
| 23               | 30.356                      | 30.760                         | 30.384                        | 29.569               | 2.367                       | 2.369                          | 2.390                         | 2.342                |
| 24               | 30.986                      | 31.428                         | 31.020                        | 30.084               | 0.630                       | 0.668                          | 0.636                         | 0.515                |

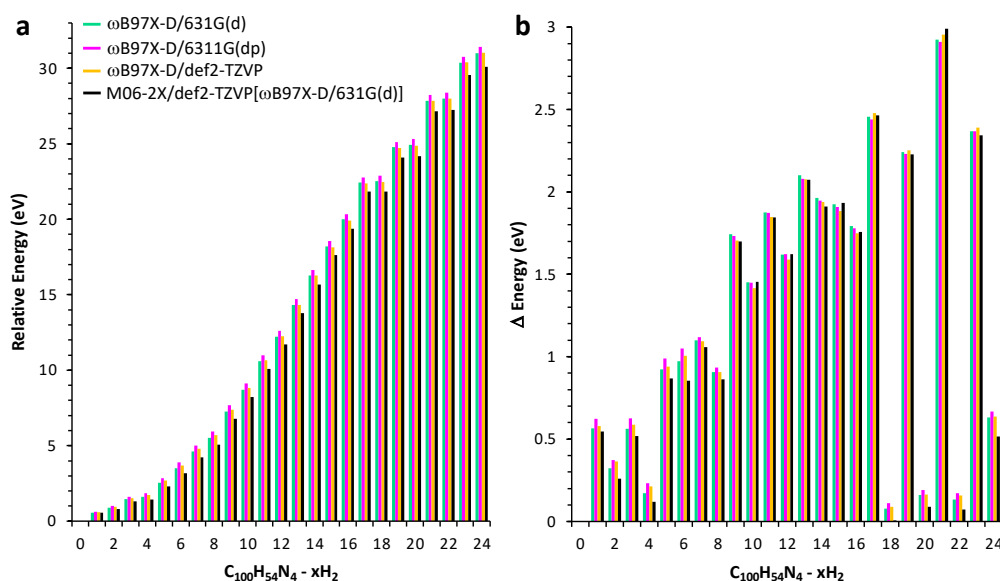

**Supplementary Fig. 15. Comparison of density functionals and basis set on thermochemical results.**

**Supplementary Table 2. Thermochemically investigated intermediates, derived from a zipper-mechanism from 1 to FP.**

| $1 - nH_2$ | Isomers |   |   |   |   |   |   |   |  |
|------------|---------|---|---|---|---|---|---|---|--|
|            | A       | B | C | D | E | F | G | H |  |
| 0          |         |   |   |   |   |   |   |   |  |
| 1          |         |   |   |   |   |   |   |   |  |
| 2          |         |   |   |   |   |   |   |   |  |
| 3          |         |   |   |   |   |   |   |   |  |
| 4          |         |   |   |   |   |   |   |   |  |
| 5          |         |   |   |   |   |   |   |   |  |
| 6          |         |   |   |   |   |   |   |   |  |
| 7          |         |   |   |   |   |   |   |   |  |
| 8          |         |   |   |   |   |   |   |   |  |
| 9          |         |   |   |   |   |   |   |   |  |
| 10         |         |   |   |   |   |   |   |   |  |
| 11         |         |   |   |   |   |   |   |   |  |
| 12         |         |   |   |   |   |   |   |   |  |

**Supplementary Table 3. (Continued) Thermochemically investigated intermediates, derived from a zipper-mechanism from 1 to FP.**

| 1 - nH <sub>2</sub> | Isomers |   |   |   |   |   |   |   |
|---------------------|---------|---|---|---|---|---|---|---|
|                     | A       | B | C | D | E | F | G | H |
| 13                  |         |   |   |   |   |   |   |   |
| 14                  |         |   |   |   |   |   |   |   |
| 15                  |         |   |   |   |   |   |   |   |
| 16                  |         |   |   |   |   |   |   |   |
| 17                  |         |   |   |   |   |   |   |   |
| 18                  |         |   |   |   |   |   |   |   |
| 19                  |         |   |   |   |   |   |   |   |
| 20                  |         |   |   |   |   |   |   |   |
| 21                  |         |   |   |   |   |   |   |   |
| 22                  |         |   |   |   |   |   |   |   |
| 23                  |         |   |   |   |   |   |   |   |
| 24                  |         |   |   |   |   |   |   |   |

**Supplementary Table 4. Thermochemical analysis of the successive cyclodehydrogenation via zipper-mechanism of 1 to FP. Calculated at the DFT  $\omega$ B97X-D/6-31G(d) level of theory;  $1 \rightarrow \text{FP} + n\text{H}_2 + E$ .**

| Entry     | Bonds    | Isomer         | Symmetry             | $E$ (hartree) | Rel. $E$ (eV) | $\Delta E$ (eV) |
|-----------|----------|----------------|----------------------|---------------|---------------|-----------------|
| 1         | --       | H <sub>2</sub> | $D_{\text{th}}$      | -1.17193      | --            | --              |
| <b>2</b>  | <b>0</b> |                | <b>C<sub>s</sub></b> | -4061.069046  | 0.000         | 0               |
| <b>3</b>  | <b>1</b> | <b>a</b>       | <b>C<sub>1</sub></b> | -4059.876385  | 0.564         | 0.564           |
| 4         | 1        | b              | C <sub>1</sub>       | -4059.874447  | 0.617         | 0.617           |
| <b>5</b>  | <b>2</b> | <b>a</b>       | <b>C<sub>1</sub></b> | -4058.692577  | 0.887         | 0.323           |
| 6         | 2        | b              | C <sub>1</sub>       | -4058.682162  | 1.171         | 0.607           |
| 7         | 2        | c              | C <sub>1</sub>       | -4058.675828  | 1.343         | 0.779           |
| 8         | 2        | d              | C <sub>1</sub>       | -4058.677583  | 1.295         | 0.731           |
| 9         | 2        | e              | C <sub>1</sub>       | -4058.683044  | 1.147         | 0.583           |
| 10        | 2        | f              | C <sub>1</sub>       | -4058.682162  | 1.171         | 0.607           |
| 11        | 2        | g = a          | C <sub>1</sub>       | -4058.692577  | 0.887         | 0.323           |
| 12        | 2        | h              | C <sub>1</sub>       | -4058.637644  | 2.382         | 1.818           |
| 13        | 3        | a              | C <sub>1</sub>       | -4057.489237  | 1.742         | 0.855           |
| 14        | 3        | b              | C <sub>1</sub>       | -4057.494952  | 1.587         | 0.699           |
| 15        | 3        | c              | C <sub>1</sub>       | -4057.499896  | 1.452         | 0.565           |
| <b>16</b> | <b>3</b> | <b>d</b>       | <b>C<sub>1</sub></b> | -4057.499961  | 1.450         | 0.563           |
| 17        | 3        | e              | C <sub>1</sub>       | -4057.496517  | 1.544         | 0.657           |
| 18        | 3        | f              | C <sub>1</sub>       | -4057.491925  | 1.669         | 0.782           |
| 19        | 3        | g              | C <sub>1</sub>       | -4057.450237  | 2.803         | 1.916           |
| 20        | 3        | h              | C <sub>1</sub>       | -4057.450708  | 2.790         | 1.903           |
| 21        | 4        | a              | C <sub>1</sub>       | -4056.297698  | 2.276         | 0.825           |
| 22        | 4        | b              | C <sub>1</sub>       | -4056.298368  | 2.257         | 0.807           |
| <b>23</b> | <b>4</b> | <b>c</b>       | <b>C<sub>2</sub></b> | -4056.321747  | 1.621         | 0.171           |
| 24        | 4        | d              | C <sub>1</sub>       | -4056.293463  | 2.391         | 0.941           |
| 25        | 4        | e              | C <sub>1</sub>       | -4056.298581  | 2.252         | 0.801           |
| 26        | 4        | f              | C <sub>1</sub>       | -4056.258051  | 3.354         | 1.904           |
| 27        | 4        | g              | C <sub>1</sub>       | -4056.259576  | 3.313         | 1.863           |
| 28        | 4        | h              | C <sub>1</sub>       | -4056.259877  | 3.305         | 1.855           |
| 29        | 5        | a              | C <sub>1</sub>       | -4055.115496  | 2.555         | 0.934           |
| <b>30</b> | <b>5</b> | <b>b</b>       | <b>C<sub>1</sub></b> | -4055.115896  | 2.544         | 0.923           |
| 31        | 5        | c              | C <sub>1</sub>       | -4055.079636  | 3.531         | 1.910           |
| 32        | 5        | d              | C <sub>1</sub>       | -4055.080209  | 3.515         | 1.894           |
| 33        | 6        | a              | C <sub>1</sub>       | -4053.906111  | 3.574         | 1.030           |
| 34        | 6        | b              | C <sub>1</sub>       | -4053.905598  | 3.588         | 1.044           |
| <b>35</b> | <b>6</b> | <b>c</b>       | <b>C<sub>1</sub></b> | -4053.908235  | 3.517         | 0.972           |
| 36        | 6        | d              | C <sub>1</sub>       | -4053.877238  | 4.360         | 1.816           |
| 37        | 6        | e              | C <sub>1</sub>       | -4053.875879  | 4.397         | 1.853           |
| 38        | 6        | f              | C <sub>1</sub>       | -4053.87034   | 4.548         | 2.003           |
| 39        | 6        | g              | C <sub>1</sub>       | -4053.867297  | 4.631         | 2.086           |
| 40        | 6        | h              | C <sub>1</sub>       | -4053.875076  | 4.419         | 1.875           |
| 41        | 7        | a = b          | C <sub>1</sub>       | -4052.695759  | 4.620         | 1.103           |
| <b>42</b> | <b>7</b> | <b>b = a</b>   | <b>C<sub>1</sub></b> | -4052.695933  | 4.615         | 1.099           |
| 43        | 7        | c              | C <sub>1</sub>       | -4052.657619  | 5.658         | 2.141           |
| 44        | 7        | d              | C <sub>1</sub>       | -4052.66657   | 5.414         | 1.898           |
| 45        | 7        | e              | C <sub>1</sub>       | -4052.659741  | 5.600         | 2.083           |
| 46        | 7        | f              | C <sub>1</sub>       | -4052.657381  | 5.664         | 2.148           |
| 47        | 7        | g              | C <sub>1</sub>       | -4052.66646   | 5.417         | 1.901           |
| 48        | 7        | h              | C <sub>1</sub>       | -4052.659989  | 5.593         | 2.077           |

|    |    |         |          |              |        |       |
|----|----|---------|----------|--------------|--------|-------|
| 49 | 8  | a       | $C_{2v}$ | -4051.490692 | 5.522  | 0.906 |
| 50 | 8  | b       | $C_1$    | -4051.4541   | 6.517  | 1.902 |
| 51 | 8  | c       | $C_1$    | -4051.459564 | 6.369  | 1.753 |
| 52 | 8  | d       | $C_1$    | -4051.448621 | 6.666  | 2.051 |
| 53 | 8  | e       | $C_1$    | -4051.44865  | 6.666  | 2.050 |
| 54 | 8  | f       | $C_1$    | -4051.448468 | 6.671  | 2.055 |
| 55 | 8  | g       | $C_1$    | -4051.450004 | 6.629  | 2.014 |
| 56 | 8  | h       | $C_1$    | -4051.456312 | 6.457  | 1.842 |
| 57 | 9  | a       | $C_1$    | -4050.254698 | 7.265  | 1.743 |
| 58 | 9  | b       | $C_1$    | -4050.251648 | 7.348  | 1.826 |
| 59 | 10 | a       | $C_1$    | -4049.000865 | 9.494  | 2.229 |
| 60 | 10 | b       | $C_1$    | -4049.009145 | 9.268  | 2.003 |
| 61 | 10 | c       | $C_1$    | -4049.013292 | 9.155  | 1.891 |
| 62 | 10 | d       | $C_1$    | -4049.020793 | 8.951  | 1.686 |
| 63 | 10 | e       | $C_1$    | -4049.017246 | 9.048  | 1.783 |
| 64 | 10 | f       | $C_1$    | -4049.019425 | 8.988  | 1.724 |
| 65 | 10 | g       | $C_s$    | -4049.029398 | 8.717  | 1.452 |
| 66 | 11 | a       | $C_1$    | -4047.778623 | 10.863 | 2.145 |
| 67 | 11 | b       | $C_1$    | -4047.783758 | 10.723 | 2.006 |
| 68 | 11 | c       | $C_1$    | -4047.78858  | 10.592 | 1.875 |
| 69 | 11 | d       | $C_1$    | -4047.763446 | 11.276 | 2.558 |
| 70 | 12 | a       | $C_1$    | -4046.541065 | 12.648 | 2.057 |
| 71 | 12 | b       | $C_1$    | -4046.538714 | 12.712 | 2.121 |
| 72 | 12 | c       | $C_1$    | -4046.557145 | 12.211 | 1.619 |
| 73 | 12 | d       | $C_1$    | -4046.543366 | 12.586 | 1.994 |
| 74 | 12 | e       | $C_1$    | -4046.536479 | 12.773 | 2.182 |
| 75 | 12 | f       | $C_1$    | -4046.522531 | 13.153 | 2.561 |
| 76 | 13 | a=b=d=e | $C_1$    | -4045.307894 | 14.315 | 2.104 |
| 77 | 13 | b=a=d=e | $C_1$    | -4045.308027 | 14.311 | 2.100 |
| 78 | 13 | c=f     | $C_1$    | -4045.29005  | 14.800 | 2.590 |
| 79 | 13 | d=a=b=e | $C_1$    | -4045.307856 | 14.316 | 2.105 |
| 80 | 13 | e=a=b=d | $C_1$    | -4045.308046 | 14.311 | 2.100 |
| 81 | 13 | f=c     | $C_1$    | -4045.290666 | 14.784 | 2.573 |
| 82 | 14 | a       | $C_1$    | -4044.060659 | 16.364 | 2.053 |
| 83 | 14 | b       | $C_1$    | -4044.050325 | 16.645 | 2.334 |
| 84 | 14 | c       | $C_s$    | -4044.062652 | 16.310 | 1.999 |
| 85 | 14 | d       | $C_1$    | -4044.063917 | 16.275 | 1.964 |
| 86 | 14 | e       | $C_1$    | -4044.040369 | 16.916 | 2.605 |
| 87 | 15 | a=c     | $C_1$    | -4042.821152 | 18.203 | 1.928 |
| 88 | 15 | b=d     | $C_1$    | -4042.803863 | 18.673 | 2.398 |
| 89 | 15 | c=a     | $C_1$    | -4042.821219 | 18.201 | 1.926 |
| 90 | 15 | d=b     | $C_1$    | -4042.803813 | 18.675 | 2.399 |
| 91 | 16 | a       | $C_2$    | -4041.583445 | 19.993 | 1.792 |
| 92 | 16 | b       | $C_1$    | -4041.559576 | 20.642 | 2.441 |
| 93 | 16 | c       | $C_1$    | -4041.55183  | 20.853 | 2.652 |
| 94 | 16 | d       | $C_1$    | -4041.559347 | 20.649 | 2.447 |
| 95 | 17 | a       | $C_s$    | -4040.321279 | 22.448 | 2.455 |
| 96 | 17 | b       | $C_s$    | -4040.320209 | 22.477 | 2.485 |
| 97 | 18 | a       | $C_1$    | -4039.053432 | 25.058 | 2.610 |
| 98 | 18 | b       | $C_{2v}$ | -4039.070262 | 24.600 | 2.152 |
| 99 | 18 | c       | $C_1$    | -4039.146456 | 22.527 | 0.079 |



|            |           |          |                            |                     |               |              |
|------------|-----------|----------|----------------------------|---------------------|---------------|--------------|
| 100        | 19        | a        | $C_1$                      | -4037.880897        | 25.075        | 2.548        |
| <b>101</b> | <b>19</b> | <b>b</b> | <b><math>C_s</math></b>    | <b>-4037.892111</b> | <b>24.770</b> | <b>2.243</b> |
| 102        | 19        | c        | $C_1$                      | -4037.88087         | 25.075        | 2.549        |
| 103        | 20        | a        | $C_1$                      | -4036.617178        | 27.572        | 2.803        |
| <b>104</b> | <b>20</b> | <b>b</b> | <b><math>C_{2v}</math></b> | <b>-4036.714259</b> | <b>24.931</b> | <b>0.161</b> |
| <b>105</b> | <b>21</b> | <b>a</b> | <b><math>C_s</math></b>    | <b>-4035.434873</b> | <b>27.855</b> | <b>2.924</b> |
| <b>106</b> | <b>22</b> | <b>a</b> | <b><math>C_s</math></b>    | <b>-4034.258017</b> | <b>27.989</b> | <b>0.134</b> |
| 107        | 22        | b        | $C_{2v}$                   | -4034.174027        | 30.274        | 2.420        |
| <b>108</b> | <b>23</b> | <b>a</b> | <b><math>C_s</math></b>    | <b>-4032.999104</b> | <b>30.356</b> | <b>2.367</b> |
| <b>109</b> | <b>24</b> | --       | <b><math>C_{2v}</math></b> | <b>-4031.804004</b> | <b>30.986</b> | <b>0.630</b> |

Supplementary Table 5. Thermochemical analysis of the successive cyclodehydrogenation via zipper-mechanism of **1** to FP. Calculated at the DFT  $\omega$ B97X-D/6-311G(d,p)[6-31G(d)] level of theory;  $\mathbf{1} \rightarrow \text{FP} + n\text{H}_2 + E$ .

| Entry      | Bonds    | Isomer         | Symmetry                | $E$ (hartree)       | Rel. $E$ (eV) | $\Delta E$ (eV) |
|------------|----------|----------------|-------------------------|---------------------|---------------|-----------------|
| 110        | --       | H <sub>2</sub> | $D_{ih}$                | -1.176081           | --            | --              |
| <b>111</b> | <b>0</b> |                | <b><math>C_s</math></b> | <b>-4061.894656</b> | <b>0.000</b>  | <b>0</b>        |
| <b>112</b> | <b>1</b> | <b>a</b>       | <b><math>C_1</math></b> | <b>-4060.695706</b> | <b>0.622</b>  | <b>0.622</b>    |
| 113        | 1        | b              | $C_1$                   | -4060.693853        | 0.673         | 0.673           |
| <b>114</b> | <b>2</b> | <b>a</b>       | <b><math>C_1</math></b> | <b>-4059.505902</b> | <b>0.996</b>  | <b>0.373</b>    |
| 115        | 2        | b              | $C_1$                   | -4059.495179        | 1.288         | 0.665           |
| 116        | 2        | c              | $C_1$                   | -4059.488681        | 1.464         | 0.842           |
| 117        | 2        | d              | $C_1$                   | -4059.490385        | 1.418         | 0.796           |
| 118        | 2        | e              | $C_1$                   | -4059.496059        | 1.264         | 0.641           |
| 119        | 2        | f              | $C_1$                   | -4059.495179        | 1.288         | 0.665           |
| 120        | 2        | g = a          | $C_1$                   | -4059.505902        | 0.996         | 0.373           |
| 121        | 2        | h              | $C_1$                   | -4059.451816        | 2.467         | 1.845           |
| 122        | 3        | a              | $C_1$                   | -4058.295839        | 1.920         | 0.925           |
| 123        | 3        | b              | $C_1$                   | -4058.301881        | 1.756         | 0.760           |
| 124        | 3        | c              | $C_1$                   | -4058.306601        | 1.628         | 0.632           |
| <b>125</b> | <b>3</b> | <b>d</b>       | <b><math>C_1</math></b> | <b>-4058.306834</b> | <b>1.621</b>  | <b>0.626</b>    |
| 126        | 3        | e              | $C_1$                   | -4058.303374        | 1.715         | 0.720           |
| 127        | 3        | f              | $C_1$                   | -4058.298699        | 1.843         | 0.847           |
| 128        | 3        | g              | $C_1$                   | -4058.259224        | 2.917         | 1.921           |
| 129        | 3        | h              | $C_1$                   | -4058.259704        | 2.904         | 1.908           |
| 130        | 4        | a              | $C_1$                   | -4057.098047        | 2.511         | 0.890           |
| 131        | 4        | b              | $C_1$                   | -4057.098381        | 2.502         | 0.881           |
| <b>132</b> | <b>4</b> | <b>c</b>       | <b><math>C_2</math></b> | <b>-4057.12226</b>  | <b>1.852</b>  | <b>0.231</b>    |
| 133        | 4        | d              | $C_1$                   | -4057.09347         | 2.636         | 1.015           |
| 134        | 4        | e              | $C_1$                   | -4057.098854        | 2.489         | 0.868           |
| 135        | 4        | f              | $C_1$                   | -4057.060686        | 3.528         | 1.907           |
| 136        | 4        | g              | $C_1$                   | -4057.062068        | 3.490         | 1.869           |
| 137        | 4        | h              | $C_1$                   | -4057.061795        | 3.498         | 1.876           |
| 138        | 5        | a              | $C_1$                   | -4055.909269        | 2.857         | 1.004           |
| <b>139</b> | <b>5</b> | <b>b</b>       | <b><math>C_1</math></b> | <b>-4055.909788</b> | <b>2.843</b>  | <b>0.990</b>    |
| 140        | 5        | c              | $C_1$                   | -4055.875521        | 3.775         | 1.923           |
| 141        | 5        | d              | $C_1$                   | -4055.876365        | 3.752         | 1.900           |
| 142        | 6        | a              | $C_1$                   | -4054.694717        | 3.904         | 1.061           |
| 143        | 6        | b              | $C_1$                   | -4054.692882        | 3.953         | 1.111           |
| <b>144</b> | <b>6</b> | <b>c</b>       | <b><math>C_1</math></b> | <b>-4054.695166</b> | <b>3.891</b>  | <b>1.049</b>    |

|            |           |                |                       |                     |               |              |
|------------|-----------|----------------|-----------------------|---------------------|---------------|--------------|
| 145        | 6         | d              | C <sub>1</sub>        | -4054.666467        | 4.672         | 1.830        |
| 146        | 6         | e              | C <sub>1</sub>        | -4054.665253        | 4.705         | 1.863        |
| 147        | 6         | f              | C <sub>1</sub>        | -4054.660519        | 4.834         | 1.992        |
| 148        | 6         | g              | C <sub>1</sub>        | -4054.657724        | 4.910         | 2.068        |
| 149        | 6         | h              | C <sub>1</sub>        | -4054.66476         | 4.719         | 1.876        |
| 150        | 7         | a = b          | C <sub>1</sub>        | -4053.477796        | 5.015         | 1.124        |
| <b>151</b> | <b>7</b>  | <b>b = a</b>   | <b>C<sub>1</sub></b>  | <b>-4053.477958</b> | <b>5.010</b>  | <b>1.119</b> |
| 152        | 7         | c              | C <sub>1</sub>        | -4053.441156        | 6.012         | 2.121        |
| 153        | 7         | d              | C <sub>1</sub>        | -4053.449357        | 5.789         | 1.897        |
| 154        | 7         | e              | C <sub>1</sub>        | -4053.443023        | 5.961         | 2.070        |
| 155        | 7         | f              | C <sub>1</sub>        | -4053.440887        | 6.019         | 2.128        |
| 156        | 7         | g              | C <sub>1</sub>        | -4053.449253        | 5.792         | 1.900        |
| 157        | 7         | h              | C <sub>1</sub>        | -4053.443334        | 5.953         | 2.061        |
| <b>158</b> | <b>8</b>  | <b>a</b>       | <b>C<sub>2v</sub></b> | <b>-4052.267551</b> | <b>5.945</b>  | <b>0.934</b> |
| 159        | 8         | b              | C <sub>1</sub>        | -4052.232563        | 6.897         | 1.886        |
| 160        | 8         | c              | C <sub>1</sub>        | -4052.237415        | 6.765         | 1.754        |
| 161        | 8         | d              | C <sub>1</sub>        | -4052.226805        | 7.053         | 2.043        |
| 162        | 8         | e              | C <sub>1</sub>        | -4052.227119        | 7.045         | 2.034        |
| 163        | 8         | f              | C <sub>1</sub>        | -4052.227222        | 7.042         | 2.031        |
| 164        | 8         | g              | C <sub>1</sub>        | -4052.228811        | 6.999         | 1.988        |
| 165        | 8         | h              | C <sub>1</sub>        | -4052.234881        | 6.834         | 1.823        |
| <b>166</b> | <b>9</b>  | <b>a</b>       | <b>C<sub>1</sub></b>  | <b>-4051.027814</b> | <b>7.677</b>  | <b>1.732</b> |
| 167        | 9         | b              | C <sub>1</sub>        | -4051.024893        | 7.756         | 1.812        |
| 168        | 10        | a              | C <sub>1</sub>        | -4049.770966        | 9.874         | 2.198        |
| 169        | 10        | b              | C <sub>1</sub>        | -4049.778393        | 9.672         | 1.996        |
| 170        | 10        | c              | C <sub>1</sub>        | -4049.782424        | 9.563         | 1.886        |
| 171        | 10        | d              | C <sub>1</sub>        | -4049.789921        | 9.359         | 1.682        |
| 172        | 10        | e              | C <sub>1</sub>        | -4049.78659         | 9.449         | 1.773        |
| 173        | 10        | f              | C <sub>1</sub>        | -4049.788642        | 9.393         | 1.717        |
| <b>174</b> | <b>10</b> | <b>g</b>       | <b>C<sub>s</sub></b>  | <b>-4049.798528</b> | <b>9.124</b>  | <b>1.448</b> |
| 175        | 11        | a              | C <sub>1</sub>        | -4048.544469        | 11.246        | 2.122        |
| 176        | 11        | b              | C <sub>1</sub>        | -4048.548955        | 11.124        | 2.000        |
| <b>177</b> | <b>11</b> | <b>c</b>       | <b>C<sub>1</sub></b>  | <b>-4048.553598</b> | <b>10.998</b> | <b>1.873</b> |
| 178        | 11        | d              | C <sub>1</sub>        | -4048.529743        | 11.647        | 2.523        |
| 179        | 12        | a              | C <sub>1</sub>        | -4047.302667        | 13.035        | 2.037        |
| 180        | 12        | b              | C <sub>1</sub>        | -4047.300515        | 13.093        | 2.095        |
| <b>181</b> | <b>12</b> | <b>c</b>       | <b>C<sub>1</sub></b>  | <b>-4047.317939</b> | <b>12.619</b> | <b>1.621</b> |
| 182        | 12        | d              | C <sub>1</sub>        | -4047.304341        | 12.989        | 1.991        |
| 183        | 12        | e              | C <sub>1</sub>        | -4047.298261        | 13.155        | 2.157        |
| 184        | 12        | f              | C <sub>1</sub>        | -4047.284756        | 13.522        | 2.524        |
| 185        | 13        | a=b=d=e        | C <sub>1</sub>        | -4046.065326        | 14.702        | 2.083        |
| <b>186</b> | <b>13</b> | <b>b=a=d=e</b> | <b>C<sub>1</sub></b>  | <b>-4046.065455</b> | <b>14.698</b> | <b>2.079</b> |
| 187        | 13        | c=f            | C <sub>1</sub>        | -4046.048108        | 15.170        | 2.551        |
| 188        | 13        | d=a=b=e        | C <sub>1</sub>        | -4046.065285        | 14.703        | 2.084        |
| 189        | 13        | e=a=b=d        | C <sub>1</sub>        | -4046.065476        | 14.698        | 2.078        |
| 190        | 13        | f=c            | C <sub>1</sub>        | -4046.048711        | 15.154        | 2.535        |
| 191        | 14        | a              | C <sub>1</sub>        | -4044.814569        | 16.734        | 2.036        |
| 192        | 14        | b              | C <sub>1</sub>        | -4044.804402        | 17.010        | 2.312        |
| 193        | 14        | c              | C <sub>s</sub>        | -4044.81659         | 16.679        | 1.981        |
| <b>194</b> | <b>14</b> | <b>d</b>       | <b>C<sub>1</sub></b>  | <b>-4044.817793</b> | <b>16.646</b> | <b>1.948</b> |
| 195        | 14        | e              | C <sub>1</sub>        | -4044.794856        | 17.270        | 2.572        |

|            |           |            |                       |                     |               |              |
|------------|-----------|------------|-----------------------|---------------------|---------------|--------------|
| 196        | 15        | a=c        | C <sub>1</sub>        | -4043.571456        | 18.558        | 1.912        |
| 197        | 15        | b=d        | C <sub>1</sub>        | -4043.554353        | 19.023        | 2.377        |
| <b>198</b> | <b>15</b> | <b>c=a</b> | <b>C<sub>1</sub></b>  | <b>-4043.571536</b> | <b>18.556</b> | <b>1.910</b> |
| 199        | 15        | d=b        | C <sub>1</sub>        | -4043.55431         | 19.024        | 2.378        |
| <b>200</b> | <b>16</b> | <b>a</b>   | <b>C<sub>2</sub></b>  | <b>-4042.330102</b> | <b>20.334</b> | <b>1.778</b> |
| 201        | 16        | b          | C <sub>1</sub>        | -4042.306101        | 20.987        | 2.431        |
| 202        | 16        | c          | C <sub>1</sub>        | -4042.298724        | 21.188        | 2.632        |
| 203        | 16        | d          | C <sub>1</sub>        | -4042.306157        | 20.986        | 2.430        |
| <b>204</b> | <b>17</b> | <b>a</b>   | <b>C<sub>s</sub></b>  | <b>-4041.064342</b> | <b>22.774</b> | <b>2.440</b> |
| 205        | 17        | b          | C <sub>s</sub>        | -4041.063088        | 22.808        | 2.474        |
| 206        | 18        | a          | C <sub>1</sub>        | -4039.79266         | 25.376        | 2.601        |
| 207        | 18        | b          | C <sub>2v</sub>       | -4039.809528        | 24.917        | 2.142        |
| <b>208</b> | <b>18</b> | <b>c</b>   | <b>C<sub>1</sub></b>  | <b>-4039.884207</b> | <b>22.885</b> | <b>0.110</b> |
| 209        | 19        | a          | C <sub>1</sub>        | -4038.614847        | 25.423        | 2.538        |
| <b>210</b> | <b>19</b> | <b>b</b>   | <b>C<sub>s</sub></b>  | <b>-4038.626159</b> | <b>25.115</b> | <b>2.230</b> |
| 211        | 19        | c          | C <sub>1</sub>        | -4038.614822        | 25.423        | 2.539        |
| 212        | 20        | a          | C <sub>1</sub>        | -4037.347597        | 27.904        | 2.789        |
| <b>213</b> | <b>20</b> | <b>b</b>   | <b>C<sub>2v</sub></b> | <b>-4037.443033</b> | <b>25.307</b> | <b>0.192</b> |
| <b>214</b> | <b>21</b> | <b>a</b>   | <b>C<sub>s</sub></b>  | <b>-4036.159965</b> | <b>28.218</b> | <b>2.911</b> |
| <b>215</b> | <b>22</b> | <b>a</b>   | <b>C<sub>s</sub></b>  | <b>-4034.977527</b> | <b>28.391</b> | <b>0.173</b> |
| 216        | 22        | b          | C <sub>2v</sub>       | -4034.894777        | 30.643        | 2.425        |
| <b>217</b> | <b>23</b> | <b>a</b>   | <b>C<sub>s</sub></b>  | <b>-4033.714377</b> | <b>30.760</b> | <b>2.369</b> |
| <b>218</b> | <b>24</b> | <b>--</b>  | <b>C<sub>2v</sub></b> | <b>-4032.513742</b> | <b>31.428</b> | <b>0.668</b> |

Supplementary Table 6. Thermochemical analysis of the successive cyclodehydrogenation via zipper-mechanism of **1** to FP. Calculated at the DFT  $\omega$ B97X-D/def2-TZVP[6-31G(d)] level of theory; **1**  $\rightarrow$  FP + nH<sub>2</sub> + E.

| Entry      | Bonds    | Isomer         | Symmetry             | E (hartree)         | Rel. E (eV)  | $\Delta E$ (eV) |
|------------|----------|----------------|----------------------|---------------------|--------------|-----------------|
| 219        | --       | H <sub>2</sub> | D <sub>ih</sub>      | -1.176081           | --           | --              |
| <b>220</b> | <b>0</b> |                | <b>C<sub>s</sub></b> | <b>-4062.374763</b> | <b>0.000</b> | <b>0</b>        |
| <b>221</b> | <b>1</b> | <b>a</b>       | <b>C<sub>1</sub></b> | <b>-4061.177384</b> | <b>0.580</b> | <b>0.580</b>    |
| 222        | 1        | b              | C <sub>1</sub>       | -4061.175135        | 0.641        | 0.641           |
| <b>223</b> | <b>2</b> | <b>a</b>       | <b>C<sub>1</sub></b> | <b>-4059.987946</b> | <b>0.943</b> | <b>0.363</b>    |
| 224        | 2        | b              | C <sub>1</sub>       | -4059.977803        | 1.219        | 0.639           |
| 225        | 2        | c              | C <sub>1</sub>       | -4059.971276        | 1.397        | 0.817           |
| 226        | 2        | d              | C <sub>1</sub>       | -4059.973031        | 1.349        | 0.769           |
| 227        | 2        | e              | C <sub>1</sub>       | -4059.979022        | 1.186        | 0.606           |
| 228        | 2        | f              | C <sub>1</sub>       | -4059.977803        | 1.219        | 0.639           |
| 229        | 2        | g = a          | C <sub>1</sub>       | -4059.987946        | 0.943        | 0.363           |
| 230        | 2        | h              | C <sub>1</sub>       | -4059.934891        | 2.387        | 1.807           |
| 231        | 3        | a              | C <sub>1</sub>       | -4058.779813        | 1.815        | 0.872           |
| 232        | 3        | b              | C <sub>1</sub>       | -4058.78495         | 1.675        | 0.732           |
| 233        | 3        | c              | C <sub>1</sub>       | -4058.790138        | 1.534        | 0.591           |
| <b>234</b> | <b>3</b> | <b>d</b>       | <b>C<sub>1</sub></b> | <b>-4058.790255</b> | <b>1.531</b> | <b>0.588</b>    |
| 235        | 3        | e              | C <sub>1</sub>       | -4058.786461        | 1.634        | 0.691           |
| 236        | 3        | f              | C <sub>1</sub>       | -4058.782686        | 1.737        | 0.794           |
| 237        | 3        | g              | C <sub>1</sub>       | -4058.742829        | 2.822        | 1.879           |
| 238        | 3        | h              | C <sub>1</sub>       | -4058.743551        | 2.802        | 1.859           |
| 239        | 4        | a              | C <sub>1</sub>       | -4057.583151        | 2.375        | 0.844           |
| 240        | 4        | b              | C <sub>1</sub>       | -4057.583121        | 2.376        | 0.845           |

|            |           |              |                       |                     |               |              |
|------------|-----------|--------------|-----------------------|---------------------|---------------|--------------|
| <b>241</b> | <b>4</b>  | <b>c</b>     | <b>C<sub>2</sub></b>  | <b>-4057.606365</b> | <b>1.744</b>  | <b>0.212</b> |
| 242        | 4         | d            | C <sub>1</sub>        | -4057.578577        | 2.500         | 0.969        |
| 243        | 4         | e            | C <sub>1</sub>        | -4057.584025        | 2.351         | 0.820        |
| 244        | 4         | f            | C <sub>1</sub>        | -4057.545651        | 3.396         | 1.865        |
| 245        | 4         | g            | C <sub>1</sub>        | -4057.547425        | 3.347         | 1.816        |
| 246        | 4         | h            | C <sub>1</sub>        | -4057.546527        | 3.372         | 1.841        |
| 247        | 5         | a            | C <sub>1</sub>        | -4056.39526         | 2.697         | 0.953        |
| <b>248</b> | <b>5</b>  | <b>b</b>     | <b>C<sub>1</sub></b>  | <b>-4056.395712</b> | <b>2.684</b>  | <b>0.941</b> |
| 249        | 5         | c            | C <sub>1</sub>        | -4056.361659        | 3.611         | 1.867        |
| 250        | 5         | d            | C <sub>1</sub>        | -4056.362337        | 3.592         | 1.849        |
| 251        | 6         | a            | C <sub>1</sub>        | -4055.181705        | 3.716         | 1.032        |
| 252        | 6         | b            | C <sub>1</sub>        | -4055.180612        | 3.746         | 1.062        |
| <b>253</b> | <b>6</b>  | <b>c</b>     | <b>C<sub>1</sub></b>  | <b>-4055.182705</b> | <b>3.689</b>  | <b>1.005</b> |
| 254        | 6         | d            | C <sub>1</sub>        | -4055.154247        | 4.463         | 1.779        |
| 255        | 6         | e            | C <sub>1</sub>        | -4055.1528          | 4.503         | 1.819        |
| 256        | 6         | f            | C <sub>1</sub>        | -4055.14713         | 4.657         | 1.973        |
| 257        | 6         | g            | C <sub>1</sub>        | -4055.144712        | 4.723         | 2.039        |
| 258        | 6         | h            | C <sub>1</sub>        | -4055.152404        | 4.514         | 1.829        |
| 259        | 7         | a = b        | C <sub>1</sub>        | -4053.966243        | 4.788         | 1.099        |
| <b>260</b> | <b>7</b>  | <b>b = a</b> | <b>C<sub>1</sub></b>  | <b>-4053.966412</b> | <b>4.783</b>  | <b>1.094</b> |
| 261        | 7         | c            | C <sub>1</sub>        | -4053.929938        | 5.776         | 2.087        |
| 262        | 7         | d            | C <sub>1</sub>        | -4053.938433        | 5.545         | 1.856        |
| 263        | 7         | e            | C <sub>1</sub>        | -4053.931123        | 5.744         | 2.054        |
| 264        | 7         | f            | C <sub>1</sub>        | -4053.929624        | 5.784         | 2.095        |
| 265        | 7         | g            | C <sub>1</sub>        | -4053.938297        | 5.548         | 1.859        |
| 266        | 7         | h            | C <sub>1</sub>        | -4053.931462        | 5.734         | 2.045        |
| <b>267</b> | <b>8</b>  | <b>a</b>     | <b>C<sub>2v</sub></b> | <b>-4052.757061</b> | <b>5.689</b>  | <b>0.905</b> |
| 268        | 8         | b            | C <sub>1</sub>        | -4052.72225         | 6.636         | 1.853        |
| 269        | 8         | c            | C <sub>1</sub>        | -4052.72755         | 6.492         | 1.708        |
| 270        | 8         | d            | C <sub>1</sub>        | -4052.716201        | 6.801         | 2.017        |
| 271        | 8         | e            | C <sub>1</sub>        | -4052.71688         | 6.782         | 1.999        |
| 272        | 8         | f            | C <sub>1</sub>        | -4052.716666        | 6.788         | 2.005        |
| 273        | 8         | g            | C <sub>1</sub>        | -4052.718185        | 6.747         | 1.963        |
| 274        | 8         | h            | C <sub>1</sub>        | -4052.724547        | 6.573         | 1.790        |
| <b>275</b> | <b>9</b>  | <b>a</b>     | <b>C<sub>1</sub></b>  | <b>-4051.518293</b> | <b>7.394</b>  | <b>1.706</b> |
| 276        | 9         | b            | C <sub>1</sub>        | -4051.515518        | 7.470         | 1.781        |
| 277        | 10        | a            | C <sub>1</sub>        | -4050.261571        | 9.589         | 2.194        |
| 278        | 10        | b            | C <sub>1</sub>        | -4050.269868        | 9.363         | 1.969        |
| 279        | 10        | c            | C <sub>1</sub>        | -4050.273741        | 9.258         | 1.863        |
| 280        | 10        | d            | C <sub>1</sub>        | -4050.281308        | 9.052         | 1.657        |
| 281        | 10        | e            | C <sub>1</sub>        | -4050.277908        | 9.144         | 1.750        |
| 282        | 10        | f            | C <sub>1</sub>        | -4050.279984        | 9.088         | 1.693        |
| <b>283</b> | <b>10</b> | <b>g</b>     | <b>C<sub>s</sub></b>  | <b>-4050.290166</b> | <b>8.811</b>  | <b>1.416</b> |
| 284        | 11        | a            | C <sub>1</sub>        | -4049.036227        | 10.929        | 2.119        |
| 285        | 11        | b            | C <sub>1</sub>        | -4049.041526        | 10.785        | 1.974        |
| <b>286</b> | <b>11</b> | <b>c</b>     | <b>C<sub>1</sub></b>  | <b>-4049.046188</b> | <b>10.658</b> | <b>1.848</b> |
| 287        | 11        | d            | C <sub>1</sub>        | -4049.019893        | 11.374        | 2.563        |
| 288        | 12        | a            | C <sub>1</sub>        | -4047.795324        | 12.693        | 2.035        |
| 289        | 12        | b            | C <sub>1</sub>        | -4047.793056        | 12.755        | 2.097        |
| <b>290</b> | <b>12</b> | <b>c</b>     | <b>C<sub>1</sub></b>  | <b>-4047.811691</b> | <b>12.248</b> | <b>1.590</b> |
| 291        | 12        | d            | C <sub>1</sub>        | -4047.797785        | 12.626        | 1.968        |

|            |           |                |                       |                     |               |              |
|------------|-----------|----------------|-----------------------|---------------------|---------------|--------------|
| 292        | 12        | e              | C <sub>1</sub>        | -4047.790911        | 12.813        | 2.155        |
| 293        | 12        | f              | C <sub>1</sub>        | -4047.776019        | 13.219        | 2.560        |
| 294        | 13        | a=b=d=e        | C <sub>1</sub>        | -4046.559146        | 14.329        | 2.081        |
| <b>295</b> | <b>13</b> | <b>b=a=d=e</b> | <b>C<sub>1</sub></b>  | <b>-4046.559304</b> | <b>14.324</b> | <b>2.076</b> |
| 296        | 13        | c=f            | C <sub>1</sub>        | -4046.540523        | 14.835        | 2.587        |
| 297        | 13        | d=a=b=e        | C <sub>1</sub>        | -4046.55909         | 14.330        | 2.082        |
| 298        | 13        | e=a=b=d        | C <sub>1</sub>        | -4046.559333        | 14.323        | 2.076        |
| 299        | 13        | f=c            | C <sub>1</sub>        | -4046.541421        | 14.811        | 2.563        |
| 300        | 14        | a              | C <sub>1</sub>        | -4045.309237        | 16.338        | 2.013        |
| 301        | 14        | b              | C <sub>1</sub>        | -4045.296909        | 16.673        | 2.349        |
| 302        | 14        | c              | C <sub>s</sub>        | -4045.310788        | 16.295        | 1.971        |
| <b>303</b> | <b>14</b> | <b>d</b>       | <b>C<sub>1</sub></b>  | <b>-4045.311974</b> | <b>16.263</b> | <b>1.939</b> |
| 304        | 14        | e              | C <sub>1</sub>        | -4045.287671        | 16.924        | 2.600        |
| 305        | 15        | a=c            | C <sub>1</sub>        | -4044.066578        | 18.149        | 1.886        |
| 306        | 15        | b=d            | C <sub>1</sub>        | -4044.04732         | 18.673        | 2.410        |
| <b>307</b> | <b>15</b> | <b>c=a</b>     | <b>C<sub>1</sub></b>  | <b>-4044.066653</b> | <b>18.147</b> | <b>1.884</b> |
| 308        | 15        | d=b            | C <sub>1</sub>        | -4044.04726         | 18.675        | 2.412        |
| <b>309</b> | <b>16</b> | <b>a</b>       | <b>C<sub>2</sub></b>  | <b>-4042.826265</b> | <b>19.897</b> | <b>1.750</b> |
| 310        | 16        | b              | C <sub>1</sub>        | -4042.799855        | 20.616        | 2.469        |
| 311        | 16        | c              | C <sub>1</sub>        | -4042.792447        | 20.817        | 2.670        |
| 312        | 16        | d              | C <sub>1</sub>        | -4042.799995        | 20.612        | 2.465        |
| <b>313</b> | <b>17</b> | <b>a</b>       | <b>C<sub>s</sub></b>  | <b>-4041.559101</b> | <b>22.376</b> | <b>2.478</b> |
| 314        | 17        | b              | C <sub>s</sub>        | -4041.557839        | 22.410        | 2.513        |
| 315        | 18        | a              | C <sub>1</sub>        | -4040.285964        | 25.017        | 2.641        |
| 316        | 18        | b              | C <sub>2v</sub>       | -4040.303314        | 24.544        | 2.169        |
| <b>317</b> | <b>18</b> | <b>c</b>       | <b>C<sub>1</sub></b>  | <b>-4040.379735</b> | <b>22.465</b> | <b>0.089</b> |
| 318        | 19        | a              | C <sub>1</sub>        | -4039.108986        | 25.041        | 2.576        |
| <b>319</b> | <b>19</b> | <b>b</b>       | <b>C<sub>s</sub></b>  | <b>-4039.120834</b> | <b>24.719</b> | <b>2.254</b> |
| 320        | 19        | c              | C <sub>1</sub>        | -4039.108959        | 25.042        | 2.577        |
| 321        | 20        | a              | C <sub>1</sub>        | -4037.840799        | 27.547        | 2.829        |
| <b>322</b> | <b>20</b> | <b>b</b>       | <b>C<sub>2v</sub></b> | <b>-4037.938729</b> | <b>24.882</b> | <b>0.164</b> |
| <b>323</b> | <b>21</b> | <b>a</b>       | <b>C<sub>s</sub></b>  | <b>-4036.654125</b> | <b>27.836</b> | <b>2.953</b> |
| <b>324</b> | <b>22</b> | <b>a</b>       | <b>C<sub>s</sub></b>  | <b>-4035.472228</b> | <b>27.994</b> | <b>0.158</b> |
| 325        | 22        | b              | C <sub>2v</sub>       | -4035.387772        | 30.292        | 2.456        |
| <b>326</b> | <b>23</b> | <b>a</b>       | <b>C<sub>s</sub></b>  | <b>-4034.20832</b>  | <b>30.384</b> | <b>2.390</b> |
| <b>327</b> | <b>24</b> | <b>--</b>      | <b>C<sub>2v</sub></b> | <b>-4033.008872</b> | <b>31.020</b> | <b>0.636</b> |

Supplementary Table 7. Thermochemical analysis of the successive cyclodehydrogenation via zipper-mechanism of **1** to FP. Calculated at the DFT M06-2X/def2-TZVP[ $\omega$ B97X-D/6-31G(d)] level of theory; **1**  $\rightarrow$  FP + nH<sub>2</sub> + E.

| Entry      | Bonds    | Isomer         | Symmetry             | E (hartree)     | Rel. E (eV)  | $\Delta E$ (eV) |
|------------|----------|----------------|----------------------|-----------------|--------------|-----------------|
| 328        | --       | H <sub>2</sub> | D <sub>ih</sub>      | -1.16846        | --           | --              |
| <b>329</b> | <b>0</b> |                | <b>C<sub>s</sub></b> | <b>-4062.23</b> | <b>0.000</b> | <b>0</b>        |
| <b>330</b> | <b>1</b> | <b>a</b>       | <b>C<sub>1</sub></b> | <b>-4061.04</b> | <b>0.546</b> | <b>0.546</b>    |
| 331        | 1        | b              | C <sub>1</sub>       | -4061.04        | 0.596        | 0.596           |
| <b>332</b> | <b>2</b> | <b>a</b>       | <b>C<sub>1</sub></b> | <b>-4059.86</b> | <b>0.804</b> | <b>0.258</b>    |
| 333        | 2        | b              | C <sub>1</sub>       | -4059.85        | 1.106        | 0.560           |
| 334        | 2        | c              | C <sub>1</sub>       | -4059.85        | 1.229        | 0.683           |

|            |          |              |                 |                 |              |              |
|------------|----------|--------------|-----------------|-----------------|--------------|--------------|
| 335        | 2        | d            | C <sub>1</sub>  | -4059.85        | 1.178        | 0.632        |
| 336        | 2        | e            | C <sub>1</sub>  | -4059.85        | 1.087        | 0.542        |
| 337        | 2        | f            | C <sub>1</sub>  | -4059.85        | 1.106        | 0.560        |
| 338        | 2        | g = a        | C <sub>1</sub>  | <b>-4059.86</b> | 0.804        | 0.258        |
| 339        | 2        | h            | C <sub>1</sub>  | -4059.81        | 2.341        | 1.795        |
| 340        | 3        | a            | C <sub>1</sub>  | -4058.66        | 1.605        | 0.801        |
| 341        | 3        | b            | C <sub>1</sub>  | -4058.67        | 1.441        | 0.637        |
| <b>342</b> | <b>3</b> | <b>c</b>     | C <sub>1</sub>  | <b>-4058.67</b> | <b>1.322</b> | <b>0.518</b> |
| 343        | 3        | d            | C <sub>1</sub>  | -4058.67        | 1.330        | 0.526        |
| 344        | 3        | e            | C <sub>1</sub>  | -4058.67        | 1.396        | 0.592        |
| 345        | 3        | f            | C <sub>1</sub>  | -4058.67        | 1.532        | 0.728        |
| 346        | 3        | g            | C <sub>1</sub>  | -4058.62        | 2.711        | 1.907        |
| 347        | 3        | h            | C <sub>1</sub>  | -4058.62        | 2.711        | 1.907        |
| 348        | 4        | a            | C <sub>1</sub>  | -4057.48        | 2.106        | 0.784        |
| 349        | 4        | b            | C <sub>1</sub>  | -4057.48        | 2.052        | 0.729        |
| <b>350</b> | <b>4</b> | <b>c</b>     | C <sub>2</sub>  | <b>-4057.5</b>  | <b>1.441</b> | <b>0.118</b> |
| 351        | 4        | d            | C <sub>1</sub>  | -4057.47        | 2.188        | 0.866        |
| 352        | 4        | e            | C <sub>1</sub>  | -4057.48        | 2.095        | 0.773        |
| 353        | 4        | f            | C <sub>1</sub>  | -4057.44        | 3.229        | 1.907        |
| 354        | 4        | g            | C <sub>1</sub>  | -4057.44        | 3.200        | 1.878        |
| 355        | 4        | h            | C <sub>1</sub>  | -4057.44        | 3.132        | 1.810        |
| 356        | 5        | a            | C <sub>1</sub>  | -4056.3         | 2.313        | 0.873        |
| <b>357</b> | <b>5</b> | <b>b</b>     | C <sub>1</sub>  | <b>-4056.3</b>  | <b>2.308</b> | <b>0.868</b> |
| 358        | 5        | c            | C <sub>1</sub>  | -4056.26        | 3.357        | 1.916        |
| 359        | 5        | d            | C <sub>1</sub>  | -4056.26        | 3.341        | 1.901        |
| 360        | 6        | a            | C <sub>1</sub>  | -4055.1         | 3.275        | 0.967        |
| 361        | 6        | b            | C <sub>1</sub>  | -4055.1         | 3.294        | 0.986        |
| <b>362</b> | <b>6</b> | <b>c</b>     | C <sub>1</sub>  | <b>-4055.1</b>  | <b>3.163</b> | <b>0.854</b> |
| 363        | 6        | d            | C <sub>1</sub>  | -4055.07        | 4.121        | 1.812        |
| 364        | 6        | e            | C <sub>1</sub>  | -4055.07        | 4.128        | 1.820        |
| 365        | 6        | f            | C <sub>1</sub>  | -4055.06        | 4.288        | 1.980        |
| 366        | 6        | g            | C <sub>1</sub>  | -4055.06        | 4.385        | 2.077        |
| 367        | 6        | h            | C <sub>1</sub>  | -4055.06        | 4.181        | 1.873        |
| 368        | 7        | a = b        | C <sub>1</sub>  | -4053.89        | 4.222        | 1.059        |
| <b>369</b> | <b>7</b> | <b>b = a</b> | C <sub>1</sub>  | <b>-4053.89</b> | <b>4.219</b> | <b>1.057</b> |
| 370        | 7        | c            | C <sub>1</sub>  | -4053.85        | 5.303        | 2.140        |
| 371        | 7        | d            | C <sub>1</sub>  | -4053.86        | 5.039        | 1.877        |
| 372        | 7        | e            | C <sub>1</sub>  | -4053.86        | 5.219        | 2.057        |
| 373        | 7        | f            | C <sub>1</sub>  | -4053.85        | 5.314        | 2.152        |
| 374        | 7        | g            | C <sub>1</sub>  | -4053.86        | 5.034        | 1.871        |
| 375        | 7        | h            | C <sub>1</sub>  | -4053.86        | 5.206        | 2.043        |
| <b>376</b> | <b>8</b> | <b>a</b>     | C <sub>2v</sub> | <b>-4052.69</b> | <b>5.081</b> | <b>0.862</b> |
| 377        | 8        | b            | C <sub>1</sub>  | -4052.66        | 6.111        | 1.892        |
| 378        | 8        | c            | C <sub>1</sub>  | -4052.66        | 5.940        | 1.720        |
| 379        | 8        | d            | C <sub>1</sub>  | -4052.65        | 6.250        | 2.030        |
| 380        | 8        | e            | C <sub>1</sub>  | -4052.65        | 6.260        | 2.041        |
| 381        | 8        | f            | C <sub>1</sub>  | -4052.65        | 6.247        | 2.028        |
| 382        | 8        | g            | C <sub>1</sub>  | -4052.65        | 6.190        | 1.971        |
| 383        | 8        | h            | C <sub>1</sub>  | -4052.66        | 6.040        | 1.821        |
| <b>384</b> | <b>9</b> | <b>a</b>     | C <sub>1</sub>  | <b>-4051.46</b> | <b>6.779</b> | <b>1.699</b> |
| 385        | 9        | b            | C <sub>1</sub>  | -4051.46        | 6.866        | 1.785        |

|            |           |                |                       |                 |               |              |
|------------|-----------|----------------|-----------------------|-----------------|---------------|--------------|
| 386        | 10        | a              | C <sub>1</sub>        | -4050.21        | 8.969         | 2.189        |
| 387        | 10        | b              | C <sub>1</sub>        | -4050.22        | 8.773         | 1.993        |
| 388        | 10        | c              | C <sub>1</sub>        | -4050.23        | 8.657         | 1.878        |
| 389        | 10        | d              | C <sub>1</sub>        | -4050.23        | 8.445         | 1.666        |
| 390        | 10        | e              | C <sub>1</sub>        | -4050.23        | 8.539         | 1.759        |
| 391        | 10        | f              | C <sub>1</sub>        | -4050.23        | 8.482         | 1.703        |
| <b>392</b> | <b>10</b> | <b>g</b>       | <b>C<sub>s</sub></b>  | <b>-4050.24</b> | <b>8.233</b>  | <b>1.454</b> |
| 393        | 11        | a              | C <sub>1</sub>        | -4048.99        | 10.353        | 2.120        |
| 394        | 11        | b              | C <sub>1</sub>        | -4049           | 10.221        | 1.988        |
| <b>395</b> | <b>11</b> | <b>c</b>       | <b>C<sub>1</sub></b>  | <b>-4049.01</b> | <b>10.079</b> | <b>1.846</b> |
| 396        | 11        | d              | C <sub>1</sub>        | -4048.98        | 10.826        | 2.593        |
| 397        | 12        | a              | C <sub>1</sub>        | -4047.76        | 12.132        | 2.053        |
| 398        | 12        | b              | C <sub>1</sub>        | -4047.76        | 12.164        | 2.085        |
| <b>399</b> | <b>12</b> | <b>c</b>       | <b>C<sub>1</sub></b>  | <b>-4047.78</b> | <b>11.700</b> | <b>1.621</b> |
| 400        | 12        | d              | C <sub>1</sub>        | -4047.76        | 12.065        | 1.986        |
| 401        | 12        | e              | C <sub>1</sub>        | -4047.76        | 12.239        | 2.160        |
| 402        | 12        | f              | C <sub>1</sub>        | -4047.74        | 12.681        | 2.602        |
| 403        | 13        | a=b=d=e        | C <sub>1</sub>        | -4046.53        | 13.782        | 2.082        |
| 404        | 13        | b=a=d=e        | C <sub>1</sub>        | -4046.53        | 13.776        | 2.076        |
| 405        | 13        | c=f            | C <sub>1</sub>        | -4046.51        | 14.329        | 2.629        |
| 406        | 13        | d=a=b=e        | C <sub>1</sub>        | -4046.53        | 13.786        | 2.086        |
| <b>407</b> | <b>13</b> | <b>e=a=b=d</b> | <b>C<sub>1</sub></b>  | <b>-4046.53</b> | <b>13.772</b> | <b>2.073</b> |
| 408        | 13        | f=c            | C <sub>1</sub>        | -4046.51        | 14.302        | 2.602        |
| 409        | 14        | a              | C <sub>1</sub>        | -4045.29        | 15.803        | 2.027        |
| 410        | 14        | b              | C <sub>1</sub>        | -4045.28        | 16.147        | 2.371        |
| 411        | 14        | c              | C <sub>s</sub>        | -4045.29        | 15.753        | 1.977        |
| <b>412</b> | <b>14</b> | <b>d</b>       | <b>C<sub>1</sub></b>  | <b>-4045.29</b> | <b>15.687</b> | <b>1.911</b> |
| 413        | 14        | e              | C <sub>1</sub>        | -4045.27        | 16.379        | 2.603        |
| 414        | 15        | a=c            | C <sub>1</sub>        | -4044.05        | 17.626        | 1.940        |
| 415        | 15        | b=d            | C <sub>1</sub>        | -4044.04        | 18.111        | 2.424        |
| <b>416</b> | <b>15</b> | <b>c=a</b>     | <b>C<sub>1</sub></b>  | <b>-4044.05</b> | <b>17.619</b> | <b>1.933</b> |
| 417        | 15        | d=b            | C <sub>1</sub>        | -4044.04        | 18.101        | 2.414        |
| <b>418</b> | <b>16</b> | <b>a</b>       | <b>C<sub>2</sub></b>  | <b>-4042.82</b> | <b>19.376</b> | <b>1.757</b> |
| 419        | 16        | b              | C <sub>1</sub>        | -4042.8         | 20.086        | 2.467        |
| 420        | 16        | c              | C <sub>1</sub>        | -4042.79        | 20.276        | 2.657        |
| 421        | 16        | d              | C <sub>1</sub>        | -4042.8         | 20.079        | 2.460        |
| <b>422</b> | <b>17</b> | <b>a</b>       | <b>C<sub>s</sub></b>  | <b>-4041.56</b> | <b>21.840</b> | <b>2.464</b> |
| 423        | 17        | b              | C <sub>s</sub>        | -4041.56        | 21.894        | 2.518        |
| 424        | 18        | a              | C <sub>1</sub>        | -4040.3         | 24.494        | 2.654        |
| 425        | 18        | b              | C <sub>2v</sub>       | -4040.31        | 23.984        | 2.144        |
| <b>426</b> | <b>18</b> | <b>c</b>       | <b>C<sub>1</sub></b>  | <b>-4040.39</b> | <b>21.847</b> | <b>0.007</b> |
| 427        | 19        | a              | C <sub>1</sub>        | -4039.13        | 24.433        | 2.586        |
| <b>428</b> | <b>19</b> | <b>b</b>       | <b>C<sub>s</sub></b>  | <b>-4039.14</b> | <b>24.076</b> | <b>2.229</b> |
| 429        | 19        | c              | C <sub>1</sub>        | -4039.13        | 24.435        | 2.588        |
| 430        | 20        | a              | C <sub>1</sub>        | -4037.87        | 26.943        | 2.867        |
| <b>431</b> | <b>20</b> | <b>b</b>       | <b>C<sub>2v</sub></b> | <b>-4037.97</b> | <b>24.165</b> | <b>0.089</b> |
| <b>432</b> | <b>21</b> | <b>a</b>       | <b>C<sub>s</sub></b>  | <b>-4036.69</b> | <b>27.155</b> | <b>2.990</b> |
| <b>433</b> | <b>22</b> | <b>a</b>       | <b>C<sub>s</sub></b>  | <b>-4035.52</b> | <b>27.227</b> | <b>0.071</b> |
| 434        | 22        | b              | C <sub>2v</sub>       | -4035.44        | 29.532        | 2.377        |
| <b>435</b> | <b>23</b> | <b>a</b>       | <b>C<sub>s</sub></b>  | <b>-4034.27</b> | <b>29.569</b> | <b>2.342</b> |
| <b>436</b> | <b>24</b> | <b>--</b>      | <b>C<sub>2v</sub></b> | <b>-4033.08</b> | <b>30.084</b> | <b>0.515</b> |

## 4.2 Homolytic bond dissociation analysis

Reference calculations for  $E_{\text{BDE}}$  and  $E_{\text{d}}$  for coronene

To calibrate and verify our energy calculations, we used coronene as a reference molecule, for which the threshold displacement energy  $E_{\text{d}} = 7.7$  eV for the C–H bond is reported in the literature.<sup>4,8</sup> As shown in Supplementary Table 8, only minor fluctuations in the bond dissociation energies  $E_{\text{BDE}}$  (5.12 – 5.16 eV) are obtained for calculations using the  $\omega$ B97X-D and M06-2X functional. At the same time, the usage of the def2-TZVP basis set gave in both cases the best results.

The threshold displacement energies  $E_{\text{d}}$ , deviate significantly dependent on the used functional and basis set from 6.40 – 7.92 eV, as shown in Supplementary Table 9, and Supplementary Fig. 16. In particular, the usage of fast and cheap functionals PBE-D3 and B3LYP underestimate  $E_{\text{d}}$  in the best case by about 1.2 and 0.6 eV, respectively. Hereby, the usage of the double- $\zeta$  basis set 6-31G(d) gave the best results, and with increasing basis set, the error becomes larger. On the other hand, the methods  $\omega$ B97X-D/6-311G(d,p) and M06-2X/def2-TZVP gave both the best results, leading to virtually the same displacement cross-section  $\sigma_{\text{d}} = 66$  barn.

$E_{\text{d}}$  was obtained from the Morse potential calculations for the gradual extension of the respective bond from equilibrium length to 7 Å. The intersection of the slopes for the binding potential (equil. – 2.5 Å) and the non-binding potential (4 – 7 Å) resulted in the determined threshold energies for the homolytic bond scissions. Since the momentum transfer and atom displacement in a knock-on displacement is considered to be faster than the reorganization of the molecular geometry to a new minimum, apart from the investigated atom, the rest of the molecular geometry was frozen.



**Supplementary Table 8. Homolytic bond dissociation energies  $E_{\text{BDE}}$  ( $\text{C}_{24}\text{H}_{12} \rightarrow \text{C}_{24}\text{H}_{11}^{\bullet} + \text{H}^{\bullet} + E$ ) for coronene.** Energies are calculated from single point calculations at various levels of theory; geometries are obtained at  $\omega\text{B97X-D/6-31G(d)}$  level of theory.

| Entry | Functional, Basis Set             | Structure                              | $E$ (hartree) | $E_{\text{BDE}}$ (eV) |
|-------|-----------------------------------|----------------------------------------|---------------|-----------------------|
| 437   | $\omega\text{B97X-D/6-31G(d)}$    | $\text{H}^{\bullet}$                   | -0.500608     | --                    |
| 438   | $\omega\text{B97X-D/6-31G(d)}$    | $\text{C}_{24}\text{H}_{11}^{\bullet}$ | -920.891449   | --                    |
| 439   | $\omega\text{B97X-D/6-31G(d)}$    | $\text{C}_{24}\text{H}_{12}$           | -921.581885   | 5.16548564            |
| 440   | $\omega\text{B97X-D/6-311G(d,p)}$ | $\text{H}^{\bullet}$                   | -0.502668     | --                    |
| 441   | $\omega\text{B97X-D/6-311G(d,p)}$ | $\text{C}_{24}\text{H}_{11}^{\bullet}$ | -921.07112    | --                    |
| 442   | $\omega\text{B97X-D/6-311G(d,p)}$ | $\text{C}_{24}\text{H}_{12}$           | -921.763175   | 5.15348541            |
| 443   | $\omega\text{B97X-D/def-2/TZVP}$  | $\text{H}^{\bullet}$                   | -0.502666     | --                    |
| 444   | $\omega\text{B97X-D/def-2/TZVP}$  | $\text{C}_{24}\text{H}_{11}^{\bullet}$ | -921.18312    | --                    |
| 445   | $\omega\text{B97X-D/def-2/TZVP}$  | $\text{C}_{24}\text{H}_{12}$           | -921.874759   | 5.14221989            |
| 446   | M06-2X/def-2/TZVP                 | $\text{H}^{\bullet}$                   | -0.498139     | --                    |
| 447   | M06-2X/def-2/TZVP                 | $\text{C}_{24}\text{H}_{11}^{\bullet}$ | -921.159302   | --                    |
| 448   | M06-2X/def-2/TZVP                 | $\text{C}_{24}\text{H}_{12}$           | -921.845772   | 5.12475017            |

**Supplementary Table 9. Summary on the threshold displacement energies  $E_d$ , the resulting displacement cross-section  $\sigma_d$ , and the minimum total electron dose  $TED_d$  for the homolytic C–H bond cleavage in coronene.** Calculated at various levels of theory; geometries are obtained at  $\omega\text{B97X-D/6-31G(d)}$  level of theory.

| Entry | Functional, Basis Set             | $E_d(\text{C}\cdots\text{H})$ (eV) | $\sigma_d$ (barn) | $TED_d$ [ $10^6 \text{ e}^- \text{ nm}^{-2}$ ] <sup>a</sup> |
|-------|-----------------------------------|------------------------------------|-------------------|-------------------------------------------------------------|
| 449   | PBE-D3/6-31G(d)                   | 6.5306                             | 78.8054           | 10.6                                                        |
| 450   | PBE-D3/6-311G(d,p)                | 6.4216                             | 80.2218           | 10.4                                                        |
| 451   | PBE-D3/def2-TZVP                  | 6.4003                             | 80.5043           | 10.4                                                        |
| 452   | B3LYP/6-31G(d)                    | 7.1411                             | 71.6746           | 11.6                                                        |
| 453   | B3LYP/6-311G(d,p)                 | 6.9722                             | 73.5219           | 11.3                                                        |
| 454   | B3LYP/def2-TZVP                   | 6.9538                             | 73.7286           | 11.3                                                        |
| 455   | $\omega\text{B97X-D/6-31G(d)}$    | 7.9213                             | 64.1681           | 13.0                                                        |
| 456   | $\omega\text{B97X-D/6-311G(d,p)}$ | 7.688                              | 66.2523           | 12.6                                                        |
| 457   | $\omega\text{B97X-D/def-2/TZVP}$  | 7.6332                             | 66.7605           | 12.5                                                        |
| 458   | M06-2X/def-2/TZVP                 | 7.7124                             | 66.0284           | 12.6                                                        |

<sup>a</sup> assuming an isotropic energy transfer for all H atoms ( $n = 12$ ).

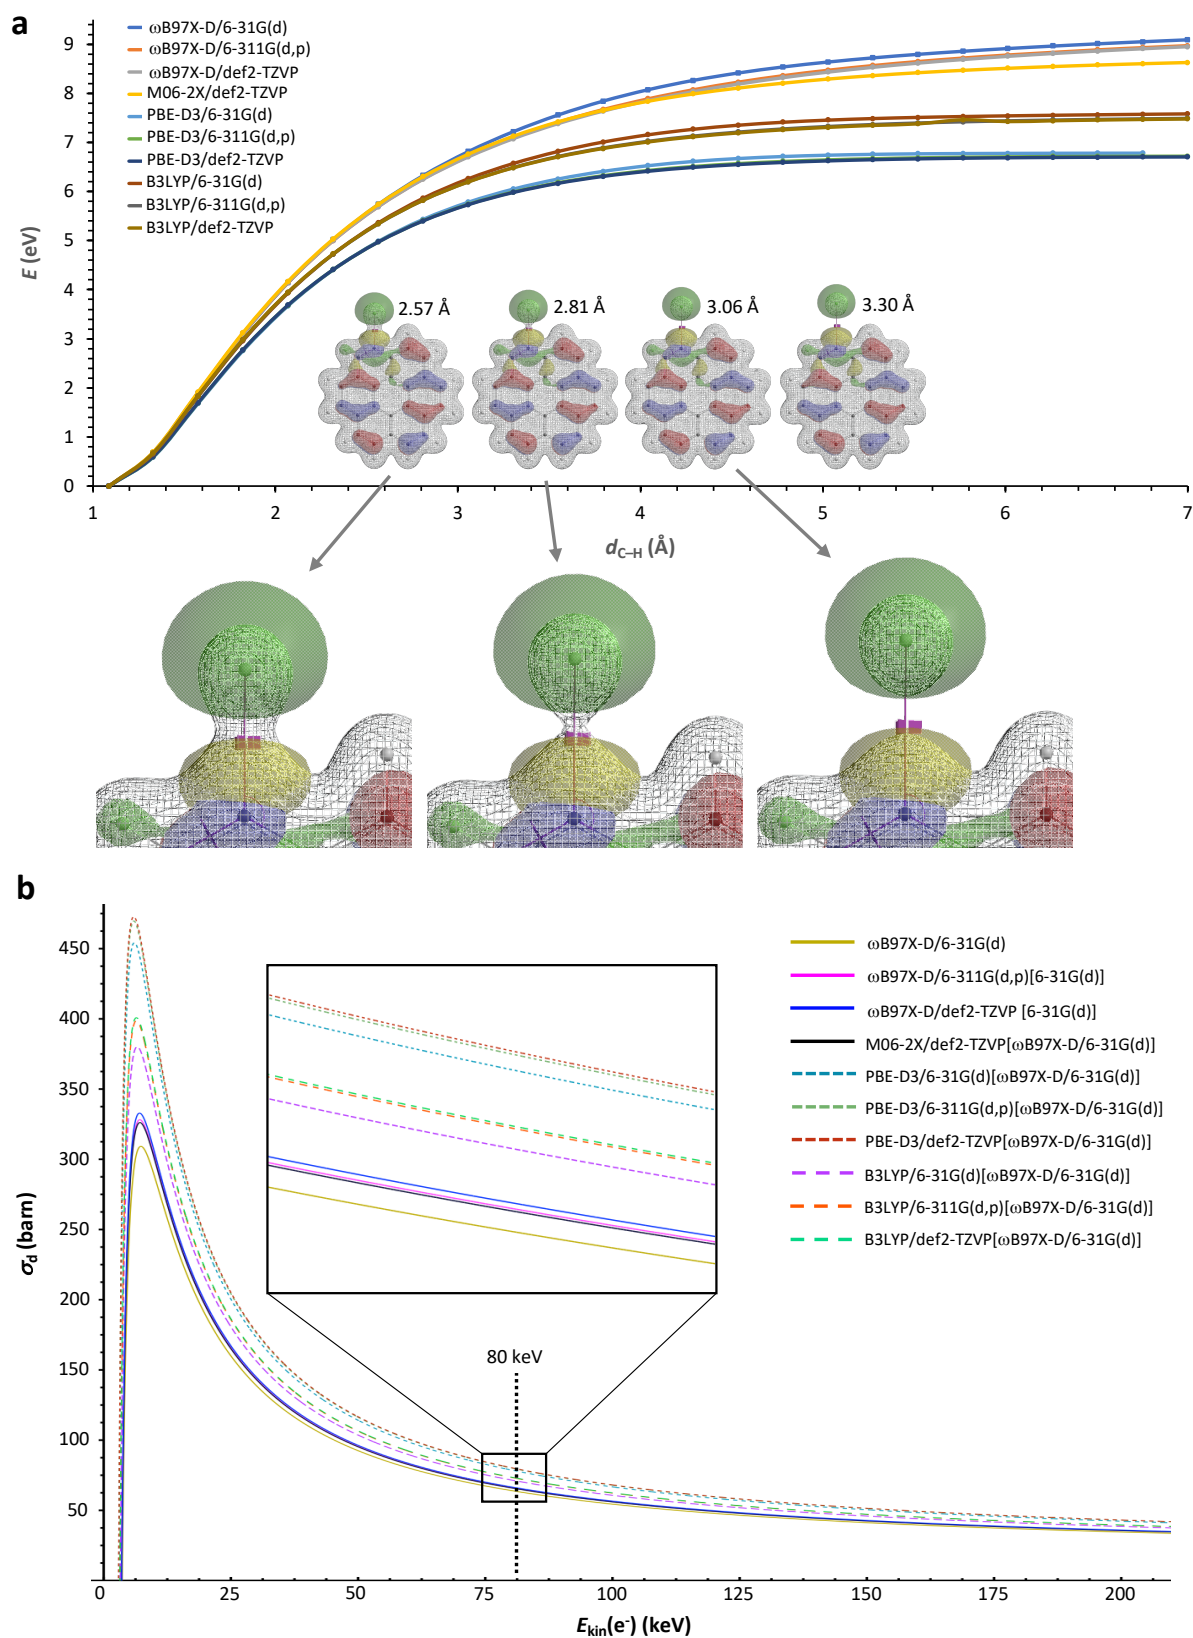

### 4.3 Orbital energies of 1 for ionization cross-section

**Supplementary Table 10. Orbital energies of 1 for the calculation of the ionization cross-section at 80 keV.**

Calculated at the  $\omega$ B97X/6-31G(d) level of theory, using the Gaussian '16 work package.

| HOMO- <i>n</i> | <i>B</i> (Hartree) | <i>U</i> (Hartree) | <i>B</i> (eV) | <i>U</i> (eV) | $\sigma_{\text{FRRB}}$ ( $\text{\AA}^2$ ) |
|----------------|--------------------|--------------------|---------------|---------------|-------------------------------------------|
| 0              | -0.21961           | 1.293024           | -5.976        | 35.185        | 0.019129179                               |
| 1              | -0.246209          | 1.470393           | -6.700        | 40.011        | 0.016888558                               |
| 2              | -0.275017          | 1.217286           | -7.484        | 33.124        | 0.014971365                               |
| 3              | -0.275458          | 1.215524           | -7.496        | 33.076        | 0.014945242                               |
| 4              | -0.27551           | 1.214133           | -7.497        | 33.038        | 0.014942175                               |
| 5              | -0.276125          | 1.21025            | -7.514        | 32.933        | 0.014905914                               |
| 6              | -0.303136          | 1.237422           | -8.249        | 33.672        | 0.013462957                               |
| 7              | -0.305436          | 1.250245           | -8.311        | 34.021        | 0.013352292                               |
| 8              | -0.306754          | 1.233055           | -8.347        | 33.553        | 0.013289793                               |
| 9              | -0.31088           | 1.272505           | -8.459        | 34.627        | 0.013097192                               |
| 10             | -0.311151          | 1.326863           | -8.467        | 36.106        | 0.013084442                               |
| 11             | -0.318804          | 1.238818           | -8.675        | 33.710        | 0.012742441                               |
| 12             | -0.32199           | 1.195113           | -8.762        | 32.521        | 0.01260509                                |
| 13             | -0.327357          | 1.161374           | -8.908        | 31.603        | 0.012379802                               |
| 14             | -0.329671          | 1.146942           | -8.971        | 31.210        | 0.012285024                               |
| 15             | -0.336265          | 1.277961           | -9.150        | 34.775        | 0.012021522                               |
| 16             | -0.336941          | 1.295567           | -9.169        | 35.254        | 0.011995095                               |
| 17             | -0.350532          | 1.148131           | -9.538        | 31.242        | 0.011488713                               |
| 18             | -0.350561          | 1.149448           | -9.539        | 31.278        | 0.011487669                               |
| 19             | -0.350598          | 1.150091           | -9.540        | 31.296        | 0.011486341                               |
| 20             | -0.350605          | 1.149549           | -9.540        | 31.281        | 0.011486093                               |
| 21             | -0.35164           | 1.131379           | -9.569        | 30.786        | 0.011449251                               |
| 22             | -0.364133          | 1.679162           | -9.909        | 45.692        | 0.01101818                                |
| 23             | -0.36463           | 1.787365           | -9.922        | 48.637        | 0.011001267                               |
| 24             | -0.36644           | 1.15647            | -9.971        | 31.469        | 0.010944805                               |
| 25             | -0.368775          | 1.257075           | -10.035       | 34.207        | 0.010868627                               |
| 26             | -0.369236          | 1.155694           | -10.047       | 31.448        | 0.01085426                                |
| 27             | -0.373557          | 1.071222           | -10.165       | 29.149        | 0.010717485                               |
| 28             | -0.376564          | 1.141974           | -10.247       | 31.075        | 0.010623652                               |
| 29             | -0.385566          | 1.145196           | -10.492       | 31.162        | 0.010352773                               |
| 30             | -0.390885          | 1.228494           | -10.637       | 33.429        | 0.010198477                               |
| 31             | -0.391682          | 1.20438            | -10.658       | 32.773        | 0.010175891                               |
| 32             | -0.3931            | 1.131751           | -10.697       | 30.797        | 0.010136069                               |
| 33             | -0.393621          | 1.206923           | -10.711       | 32.842        | 0.010121078                               |
| 34             | -0.41369           | 1.473761           | -11.257       | 40.103        | 0.009584207                               |
| 35             | -0.415951          | 1.548396           | -11.319       | 42.134        | 0.009526926                               |
| 36             | -0.41604           | 1.544558           | -11.321       | 42.030        | 0.009524712                               |
| 37             | -0.416138          | 1.545659           | -11.324       | 42.060        | 0.009522254                               |
| 38             | -0.421932          | 1.524114           | -11.481       | 41.473        | 0.009379366                               |
| 39             | -0.422998          | 1.450893           | -11.510       | 39.481        | 0.009353794                               |
| 40             | -0.425065          | 1.672967           | -11.567       | 45.524        | 0.009303164                               |

|    |           |          |         |        |             |
|----|-----------|----------|---------|--------|-------------|
| 41 | -0.425293 | 1.409515 | -11.573 | 38.355 | 0.009298739 |
| 42 | -0.425776 | 1.460583 | -11.586 | 39.745 | 0.009286997 |
| 43 | -0.425973 | 1.639875 | -11.591 | 44.623 | 0.009281596 |
| 44 | -0.427474 | 1.64932  | -11.632 | 44.880 | 0.009245901 |
| 45 | -0.430497 | 1.426395 | -11.714 | 38.814 | 0.009175737 |
| 46 | -0.436117 | 1.406651 | -11.867 | 38.277 | 0.009046484 |
| 47 | -0.440843 | 1.179084 | -11.996 | 32.085 | 0.008941246 |
| 48 | -0.443193 | 1.523045 | -12.060 | 41.444 | 0.008888075 |
| 49 | -0.446343 | 1.526027 | -12.146 | 41.525 | 0.008819423 |
| 50 | -0.447033 | 1.085501 | -12.164 | 29.538 | 0.008806157 |
| 51 | -0.450827 | 1.597354 | -12.268 | 43.466 | 0.008723176 |
| 52 | -0.452042 | 0.985904 | -12.301 | 26.828 | 0.008699752 |
| 53 | -0.452352 | 0.98406  | -12.309 | 26.778 | 0.008693232 |
| 54 | -0.452428 | 0.979884 | -12.311 | 26.664 | 0.008691648 |
| 55 | -0.452898 | 1.001665 | -12.324 | 27.257 | 0.008681694 |
| 56 | -0.454937 | 1.532039 | -12.379 | 41.689 | 0.00863717  |
| 57 | -0.460465 | 1.176207 | -12.530 | 32.006 | 0.008524978 |
| 58 | -0.460494 | 1.135283 | -12.531 | 30.893 | 0.008524537 |
| 59 | -0.461815 | 1.540629 | -12.567 | 41.923 | 0.008496388 |
| 60 | -0.463993 | 1.496409 | -12.626 | 40.719 | 0.008452883 |
| 61 | -0.46592  | 1.455118 | -12.678 | 39.596 | 0.008414753 |
| 62 | -0.466402 | 1.40423  | -12.691 | 38.211 | 0.00840541  |
| 63 | -0.467049 | 1.418836 | -12.709 | 38.609 | 0.008392608 |
| 64 | -0.467082 | 1.378018 | -12.710 | 37.498 | 0.008392103 |
| 65 | -0.467217 | 1.477389 | -12.714 | 40.202 | 0.008389096 |
| 66 | -0.469648 | 1.516268 | -12.780 | 41.260 | 0.008341415 |
| 67 | -0.469904 | 1.087355 | -12.787 | 29.588 | 0.008337946 |
| 68 | -0.474461 | 1.065897 | -12.911 | 29.005 | 0.008250352 |
| 69 | -0.475    | 1.06043  | -12.925 | 28.856 | 0.008240118 |
| 70 | -0.479037 | 1.056312 | -13.035 | 28.744 | 0.008164101 |
| 71 | -0.489734 | 1.492646 | -13.326 | 40.617 | 0.007967492 |
| 72 | -0.493297 | 1.311329 | -13.423 | 35.683 | 0.007905068 |
| 73 | -0.493307 | 1.311241 | -13.424 | 35.681 | 0.007904892 |
| 74 | -0.493342 | 1.310478 | -13.425 | 35.660 | 0.00790428  |
| 75 | -0.49347  | 1.314582 | -13.428 | 35.772 | 0.00790202  |
| 76 | -0.498033 | 1.467897 | -13.552 | 39.944 | 0.007822223 |
| 77 | -0.50014  | 1.394407 | -13.610 | 37.944 | 0.007786362 |
| 78 | -0.501731 | 1.409941 | -13.653 | 38.366 | 0.00775926  |
| 79 | -0.502166 | 1.40845  | -13.665 | 38.326 | 0.0077519   |
| 80 | -0.50226  | 1.431682 | -13.667 | 38.958 | 0.007750234 |
| 81 | -0.502828 | 1.427056 | -13.683 | 38.832 | 0.007740656 |
| 82 | -0.503046 | 1.430096 | -13.689 | 38.915 | 0.00773697  |
| 83 | -0.504853 | 1.405112 | -13.738 | 38.235 | 0.007706709 |
| 84 | -0.505537 | 1.389776 | -13.756 | 37.818 | 0.007695333 |
| 85 | -0.505952 | 1.419763 | -13.768 | 38.634 | 0.007688319 |
| 86 | -0.508973 | 1.458065 | -13.850 | 39.676 | 0.007638199 |
| 87 | -0.509405 | 1.233427 | -13.862 | 33.563 | 0.007631823 |

|     |           |          |         |        |             |
|-----|-----------|----------|---------|--------|-------------|
| 88  | -0.513646 | 1.435383 | -13.977 | 39.059 | 0.007562144 |
| 89  | -0.516224 | 1.422412 | -14.047 | 38.706 | 0.007520802 |
| 90  | -0.517553 | 1.452571 | -14.083 | 39.526 | 0.007499541 |
| 91  | -0.521476 | 1.308942 | -14.190 | 35.618 | 0.007438172 |
| 92  | -0.521924 | 1.185687 | -14.202 | 32.264 | 0.007431559 |
| 93  | -0.52195  | 1.226901 | -14.203 | 33.386 | 0.007431024 |
| 94  | -0.523359 | 1.433527 | -14.241 | 39.008 | 0.007408451 |
| 95  | -0.526264 | 1.052151 | -14.320 | 28.631 | 0.007364816 |
| 96  | -0.526459 | 1.02998  | -14.326 | 28.027 | 0.007361895 |
| 97  | -0.529105 | 1.305074 | -14.398 | 35.513 | 0.007320694 |
| 98  | -0.532591 | 0.918402 | -14.493 | 24.991 | 0.007269362 |
| 99  | -0.533351 | 1.32188  | -14.513 | 35.970 | 0.007256771 |
| 100 | -0.535196 | 1.35843  | -14.563 | 36.965 | 0.007229236 |
| 101 | -0.535898 | 1.42398  | -14.583 | 38.748 | 0.007218654 |
| 102 | -0.537711 | 1.412677 | -14.632 | 38.441 | 0.007192006 |
| 103 | -0.53829  | 1.430896 | -14.648 | 38.937 | 0.007183468 |
| 104 | -0.540238 | 1.43831  | -14.701 | 39.138 | 0.007155049 |
| 105 | -0.540428 | 1.342418 | -14.706 | 36.529 | 0.00715258  |
| 106 | -0.540785 | 1.199241 | -14.716 | 32.633 | 0.007147834 |
| 107 | -0.541212 | 1.389207 | -14.727 | 37.802 | 0.007141078 |
| 108 | -0.541258 | 1.368212 | -14.728 | 37.231 | 0.007140476 |
| 109 | -0.541265 | 1.369391 | -14.729 | 37.263 | 0.007140371 |
| 110 | -0.541305 | 1.346868 | -14.730 | 36.650 | 0.00713986  |
| 111 | -0.541608 | 1.481925 | -14.738 | 40.325 | 0.007135074 |
| 112 | -0.545231 | 1.485696 | -14.836 | 40.428 | 0.007083089 |
| 113 | -0.547053 | 1.416858 | -14.886 | 38.555 | 0.007057427 |
| 114 | -0.550093 | 1.422748 | -14.969 | 38.715 | 0.007014649 |
| 115 | -0.554414 | 1.41303  | -15.086 | 38.451 | 0.00695474  |
| 116 | -0.554981 | 1.223906 | -15.102 | 33.304 | 0.006947502 |
| 117 | -0.555832 | 1.389945 | -15.125 | 37.822 | 0.00693535  |
| 118 | -0.559371 | 1.183251 | -15.221 | 32.198 | 0.006887838 |
| 119 | -0.562988 | 1.185377 | -15.320 | 32.256 | 0.006839307 |
| 120 | -0.567659 | 1.39717  | -15.447 | 38.019 | 0.006776992 |
| 121 | -0.570449 | 1.295386 | -15.523 | 35.249 | 0.006740928 |
| 122 | -0.570513 | 1.325665 | -15.524 | 36.073 | 0.006740012 |
| 123 | -0.574924 | 1.237438 | -15.644 | 33.672 | 0.006683549 |
| 124 | -0.578651 | 1.414941 | -15.746 | 38.503 | 0.006635837 |
| 125 | -0.580023 | 1.484806 | -15.783 | 40.404 | 0.006618421 |
| 126 | -0.580518 | 1.20659  | -15.797 | 32.833 | 0.006613005 |
| 127 | -0.592447 | 1.329151 | -16.121 | 36.168 | 0.0064667   |
| 128 | -0.594406 | 1.479311 | -16.175 | 40.254 | 0.006442906 |
| 129 | -0.600495 | 1.313938 | -16.340 | 35.754 | 0.006371684 |
| 130 | -0.601219 | 1.312521 | -16.360 | 35.716 | 0.006363267 |
| 131 | -0.603823 | 1.311636 | -16.431 | 35.691 | 0.006333155 |
| 132 | -0.605332 | 1.331993 | -16.472 | 36.245 | 0.006315774 |
| 133 | -0.606907 | 1.232924 | -16.515 | 33.550 | 0.006298048 |
| 134 | -0.612969 | 1.443968 | -16.680 | 39.292 | 0.006229155 |

|     |           |          |         |        |             |
|-----|-----------|----------|---------|--------|-------------|
| 135 | -0.613969 | 1.375596 | -16.707 | 37.432 | 0.006218197 |
| 136 | -0.618473 | 1.280276 | -16.830 | 34.838 | 0.006168748 |
| 137 | -0.619681 | 1.293423 | -16.862 | 35.196 | 0.006155513 |
| 138 | -0.620037 | 1.297184 | -16.872 | 35.298 | 0.006151623 |
| 139 | -0.620684 | 1.306085 | -16.890 | 35.540 | 0.00614456  |
| 140 | -0.624326 | 1.54198  | -16.989 | 41.959 | 0.00610461  |
| 141 | -0.626247 | 1.221226 | -17.041 | 33.231 | 0.006084875 |
| 142 | -0.633771 | 1.429677 | -17.246 | 38.904 | 0.006005071 |
| 143 | -0.633818 | 1.427396 | -17.247 | 38.841 | 0.006004588 |
| 144 | -0.63386  | 1.430187 | -17.248 | 38.917 | 0.006004144 |
| 145 | -0.634211 | 1.408049 | -17.258 | 38.315 | 0.006000551 |
| 146 | -0.637265 | 1.19655  | -17.341 | 32.560 | 0.005969512 |
| 147 | -0.639602 | 1.132401 | -17.404 | 30.814 | 0.005945723 |
| 148 | -0.640958 | 1.140607 | -17.441 | 31.038 | 0.00593189  |
| 149 | -0.644322 | 1.226256 | -17.533 | 33.368 | 0.005897672 |
| 150 | -0.645176 | 1.241167 | -17.556 | 33.774 | 0.005889062 |
| 151 | -0.655169 | 1.53482  | -17.828 | 41.765 | 0.005789759 |
| 152 | -0.655954 | 1.580667 | -17.849 | 43.012 | 0.005782037 |
| 153 | -0.66212  | 1.517865 | -18.017 | 41.303 | 0.005723065 |
| 154 | -0.672172 | 1.381845 | -18.291 | 37.602 | 0.005629429 |
| 155 | -0.674001 | 1.474224 | -18.341 | 40.116 | 0.005612428 |
| 156 | -0.685206 | 1.594704 | -18.645 | 43.394 | 0.00551138  |
| 157 | -0.692438 | 1.511298 | -18.842 | 41.125 | 0.005448345 |
| 158 | -0.695944 | 1.632115 | -18.938 | 44.412 | 0.00541791  |
| 159 | -0.703519 | 1.576405 | -19.144 | 42.896 | 0.00535395  |
| 160 | -0.704279 | 1.382409 | -19.164 | 37.617 | 0.005348037 |
| 161 | -0.719827 | 1.550861 | -19.588 | 42.201 | 0.005220814 |
| 162 | -0.728575 | 1.551609 | -19.826 | 42.221 | 0.00515193  |
| 163 | -0.729015 | 1.540938 | -19.838 | 41.931 | 0.005148534 |
| 164 | -0.73145  | 1.380148 | -19.904 | 37.556 | 0.005130039 |
| 165 | -0.731539 | 1.378808 | -19.906 | 37.519 | 0.005129355 |
| 166 | -0.731702 | 1.374394 | -19.911 | 37.399 | 0.005128108 |
| 167 | -0.732246 | 1.383313 | -19.925 | 37.642 | 0.0051239   |
| 168 | -0.739402 | 1.552967 | -20.120 | 42.258 | 0.005069032 |
| 169 | -0.739418 | 1.545831 | -20.121 | 42.064 | 0.005068926 |
| 170 | -0.740128 | 1.58394  | -20.140 | 43.101 | 0.005063498 |
| 171 | -0.746654 | 1.375355 | -20.318 | 37.425 | 0.005015287 |
| 172 | -0.746654 | 1.375594 | -20.318 | 37.432 | 0.005015287 |
| 173 | -0.746666 | 1.375425 | -20.318 | 37.427 | 0.005015199 |
| 174 | -0.746673 | 1.375625 | -20.318 | 37.433 | 0.005015146 |
| 175 | -0.750381 | 1.579042 | -20.419 | 42.968 | 0.004987469 |
| 176 | -0.750553 | 1.577546 | -20.424 | 42.927 | 0.004986215 |
| 177 | -0.750813 | 1.572111 | -20.431 | 42.779 | 0.004984327 |
| 178 | -0.751364 | 1.566538 | -20.446 | 42.628 | 0.004980319 |
| 179 | -0.759318 | 1.558818 | -20.662 | 42.418 | 0.004922981 |
| 180 | -0.759858 | 1.482092 | -20.677 | 40.330 | 0.004919291 |
| 181 | -0.765246 | 1.474475 | -20.823 | 40.123 | 0.004881219 |

|     |           |          |         |        |             |
|-----|-----------|----------|---------|--------|-------------|
| 182 | -0.779454 | 1.640482 | -21.210 | 44.640 | 0.004783084 |
| 183 | -0.784307 | 1.646418 | -21.342 | 44.801 | 0.004750518 |
| 184 | -0.821329 | 1.711625 | -22.350 | 46.576 | 0.00451526  |
| 185 | -0.830975 | 1.699965 | -22.612 | 46.258 | 0.004457613 |
| 186 | -0.838675 | 1.620781 | -22.822 | 44.104 | 0.004412721 |
| 187 | -0.838689 | 1.620644 | -22.822 | 44.100 | 0.00441264  |
| 188 | -0.838723 | 1.620251 | -22.823 | 44.089 | 0.004412443 |
| 189 | -0.838786 | 1.620118 | -22.825 | 44.086 | 0.004412079 |
| 190 | -0.847594 | 1.683565 | -23.064 | 45.812 | 0.004361502 |
| 191 | -0.851615 | 1.715392 | -23.174 | 46.678 | 0.004338772 |
| 192 | -0.856991 | 1.667897 | -23.320 | 45.386 | 0.004308893 |
| 193 | -0.864997 | 1.701268 | -23.538 | 46.294 | 0.00426493  |
| 194 | -0.865052 | 1.615103 | -23.539 | 43.949 | 0.004264786 |
| 195 | -0.865513 | 1.615635 | -23.552 | 43.964 | 0.004262283 |
| 196 | -0.867004 | 1.657352 | -23.592 | 45.099 | 0.004254136 |
| 197 | -0.873281 | 1.626578 | -23.763 | 44.261 | 0.004220522 |
| 198 | -0.876826 | 1.621361 | -23.860 | 44.120 | 0.004201739 |
| 199 | -0.878029 | 1.624499 | -23.892 | 44.205 | 0.004195392 |
| 200 | -0.878249 | 1.622428 | -23.898 | 44.149 | 0.004194238 |
| 201 | -0.878973 | 1.623387 | -23.918 | 44.175 | 0.00419043  |
| 202 | -0.885387 | 1.591228 | -24.093 | 43.300 | 0.004157057 |
| 203 | -0.886442 | 1.591972 | -24.121 | 43.320 | 0.004151605 |
| 204 | -0.892079 | 1.631555 | -24.275 | 44.397 | 0.004122644 |
| 205 | -0.89622  | 1.625494 | -24.387 | 44.232 | 0.004101671 |
| 206 | -0.897829 | 1.591794 | -24.431 | 43.315 | 0.004093631 |
| 207 | -0.897833 | 1.591229 | -24.431 | 43.300 | 0.004093612 |
| 208 | -0.897839 | 1.59149  | -24.431 | 43.307 | 0.004093581 |
| 209 | -0.898063 | 1.588466 | -24.438 | 43.224 | 0.004092462 |
| 210 | -0.908898 | 1.569871 | -24.732 | 42.718 | 0.004038768 |
| 211 | -0.91499  | 1.579018 | -24.898 | 42.967 | 0.00400913  |
| 212 | -0.919844 | 1.555994 | -25.030 | 42.341 | 0.003985859 |
| 213 | -0.943054 | 1.524238 | -25.662 | 41.477 | 0.00387792  |
| 214 | -0.951226 | 1.524269 | -25.884 | 41.477 | 0.003841208 |
| 215 | -0.952975 | 1.542697 | -25.932 | 41.979 | 0.003833407 |
| 216 | -0.9644   | 1.52224  | -26.243 | 41.422 | 0.003783398 |
| 217 | -0.964558 | 1.494936 | -26.247 | 40.679 | 0.003782758 |
| 218 | -0.964562 | 1.494959 | -26.247 | 40.680 | 0.003782741 |
| 219 | -0.964569 | 1.494861 | -26.247 | 40.677 | 0.003782711 |
| 220 | -0.964579 | 1.495955 | -26.248 | 40.707 | 0.003782666 |
| 221 | -0.969316 | 1.536718 | -26.376 | 41.816 | 0.003762223 |
| 222 | -0.970196 | 1.524123 | -26.400 | 41.474 | 0.00375848  |
| 223 | -0.983502 | 1.520124 | -26.762 | 41.365 | 0.00370245  |
| 224 | -0.98389  | 1.518666 | -26.773 | 41.325 | 0.003700842 |
| 225 | -0.991859 | 1.481397 | -26.990 | 40.311 | 0.003668119 |
| 226 | -0.992341 | 1.479657 | -27.003 | 40.264 | 0.003666156 |
| 227 | -0.992974 | 1.479005 | -27.020 | 40.246 | 0.00366358  |
| 228 | -0.996041 | 1.470377 | -27.104 | 40.011 | 0.003651152 |

|     |            |           |          |         |             |
|-----|------------|-----------|----------|---------|-------------|
| 229 | -1.030604  | 1.441497  | -28.044  | 39.225  | 0.003516347 |
| 230 | -1.030673  | 1.441895  | -28.046  | 39.236  | 0.003516086 |
| 231 | -1.030813  | 1.440299  | -28.050  | 39.193  | 0.003515562 |
| 232 | -1.031079  | 1.43902   | -28.057  | 39.158  | 0.003514563 |
| 233 | -1.073001  | 1.718018  | -29.198  | 46.750  | 0.003362933 |
| 234 | -1.076162  | 1.693992  | -29.284  | 46.096  | 0.003352065 |
| 235 | -1.120405  | 1.774149  | -30.488  | 48.277  | 0.003206108 |
| 236 | -1.122179  | 1.757263  | -30.536  | 47.818  | 0.003200533 |
| 237 | -10.26256  | 15.91486  | -279.259 | 433.066 | 0.000265811 |
| 238 | -10.26256  | 15.914863 | -279.259 | 433.066 | 0.000265811 |
| 239 | -10.263024 | 15.90346  | -279.271 | 432.755 | 0.000265799 |
| 240 | -10.263024 | 15.90346  | -279.271 | 432.755 | 0.000265799 |
| 241 | -10.26396  | 15.90594  | -279.297 | 432.823 | 0.000265771 |
| 242 | -10.26396  | 15.90594  | -279.297 | 432.823 | 0.000265771 |
| 243 | -10.263983 | 15.902618 | -279.297 | 432.732 | 0.00026577  |
| 244 | -10.263983 | 15.902616 | -279.297 | 432.732 | 0.00026577  |
| 245 | -10.265464 | 15.909331 | -279.338 | 432.915 | 0.000265726 |
| 246 | -10.265464 | 15.909339 | -279.338 | 432.915 | 0.000265726 |
| 247 | -10.26594  | 15.898364 | -279.351 | 432.617 | 0.000265713 |
| 248 | -10.26594  | 15.898382 | -279.351 | 432.617 | 0.000265713 |
| 249 | -10.270516 | 15.91461  | -279.475 | 433.059 | 0.000265576 |
| 250 | -10.270543 | 15.914614 | -279.476 | 433.059 | 0.000265575 |
| 251 | -10.270963 | 15.903204 | -279.487 | 432.748 | 0.000265564 |
| 252 | -10.27099  | 15.90321  | -279.488 | 432.749 | 0.000265563 |
| 253 | -10.272051 | 15.90386  | -279.517 | 432.766 | 0.000265531 |
| 254 | -10.272058 | 15.901796 | -279.517 | 432.710 | 0.000265531 |
| 255 | -10.272077 | 15.903857 | -279.518 | 432.766 | 0.000265531 |
| 256 | -10.272083 | 15.901789 | -279.518 | 432.710 | 0.000265531 |
| 257 | -10.2746   | 15.90708  | -279.586 | 432.854 | 0.000265456 |
| 258 | -10.274601 | 15.907185 | -279.586 | 432.857 | 0.000265456 |
| 259 | -10.274607 | 15.907085 | -279.586 | 432.854 | 0.000265455 |
| 260 | -10.274607 | 15.907189 | -279.586 | 432.857 | 0.000265455 |
| 261 | -10.275545 | 15.907668 | -279.612 | 432.870 | 0.000265428 |
| 262 | -10.275545 | 15.90775  | -279.612 | 432.872 | 0.000265428 |
| 263 | -10.275547 | 15.907707 | -279.612 | 432.871 | 0.000265428 |
| 264 | -10.275548 | 15.907782 | -279.612 | 432.873 | 0.000265428 |
| 265 | -10.276935 | 15.91325  | -279.650 | 433.022 | 0.000265386 |
| 266 | -10.276935 | 15.91325  | -279.650 | 433.022 | 0.000265386 |
| 267 | -10.27694  | 15.913208 | -279.650 | 433.021 | 0.000265386 |
| 268 | -10.27694  | 15.913208 | -279.650 | 433.021 | 0.000265386 |
| 269 | -10.277124 | 15.905588 | -279.655 | 432.813 | 0.000265381 |
| 270 | -10.277124 | 15.905588 | -279.655 | 432.813 | 0.000265381 |
| 271 | -10.277131 | 15.905631 | -279.655 | 432.814 | 0.000265381 |
| 272 | -10.277131 | 15.905631 | -279.655 | 432.814 | 0.000265381 |
| 273 | -10.277944 | 15.899044 | -279.677 | 432.635 | 0.000265358 |
| 274 | -10.277944 | 15.899044 | -279.677 | 432.635 | 0.000265358 |
| 275 | -10.27795  | 15.899043 | -279.677 | 432.635 | 0.000265357 |



|     |            |           |          |         |             |
|-----|------------|-----------|----------|---------|-------------|
| 276 | -10.27795  | 15.899043 | -279.677 | 432.635 | 0.000265357 |
| 277 | -10.278195 | 15.912461 | -279.684 | 433.000 | 0.000265349 |
| 278 | -10.278195 | 15.912462 | -279.684 | 433.000 | 0.000265349 |
| 279 | -10.278202 | 15.912471 | -279.684 | 433.001 | 0.000265349 |
| 280 | -10.278202 | 15.912472 | -279.684 | 433.001 | 0.000265349 |
| 281 | -10.278719 | 15.913274 | -279.698 | 433.022 | 0.000265333 |
| 282 | -10.278719 | 15.913275 | -279.698 | 433.022 | 0.000265333 |
| 283 | -10.278726 | 15.913261 | -279.699 | 433.022 | 0.000265333 |
| 284 | -10.278726 | 15.913261 | -279.699 | 433.022 | 0.000265333 |
| 285 | -10.279064 | 15.899375 | -279.708 | 432.644 | 0.000265325 |
| 286 | -10.279064 | 15.899375 | -279.708 | 432.644 | 0.000265325 |
| 287 | -10.27907  | 15.899364 | -279.708 | 432.644 | 0.000265324 |
| 288 | -10.27907  | 15.899364 | -279.708 | 432.644 | 0.000265324 |
| 289 | -10.279494 | 15.898649 | -279.719 | 432.624 | 0.000265312 |
| 290 | -10.279494 | 15.898649 | -279.719 | 432.624 | 0.000265312 |
| 291 | -10.279502 | 15.898663 | -279.720 | 432.625 | 0.000265312 |
| 292 | -10.279502 | 15.898663 | -279.720 | 432.625 | 0.000265312 |
| 293 | -10.280857 | 15.911266 | -279.757 | 432.968 | 0.00026527  |
| 294 | -10.280887 | 15.911266 | -279.757 | 432.968 | 0.000265269 |
| 295 | -10.281311 | 15.899903 | -279.769 | 432.659 | 0.000265258 |
| 296 | -10.281342 | 15.899902 | -279.770 | 432.659 | 0.000265257 |
| 297 | -10.283702 | 15.910861 | -279.834 | 432.957 | 0.000265186 |
| 298 | -10.283702 | 15.910862 | -279.834 | 432.957 | 0.000265186 |
| 299 | -10.283709 | 15.910865 | -279.834 | 432.957 | 0.000265186 |
| 300 | -10.283709 | 15.910865 | -279.834 | 432.957 | 0.000265186 |
| 301 | -10.284108 | 15.909924 | -279.845 | 432.931 | 0.000265174 |
| 302 | -10.284109 | 15.910149 | -279.845 | 432.937 | 0.000265174 |
| 303 | -10.284109 | 15.910226 | -279.845 | 432.940 | 0.000265174 |
| 304 | -10.28411  | 15.910334 | -279.845 | 432.942 | 0.000265174 |
| 305 | -10.284839 | 15.90841  | -279.865 | 432.890 | 0.000265153 |
| 306 | -10.284839 | 15.908415 | -279.865 | 432.890 | 0.000265153 |
| 307 | -10.284845 | 15.908397 | -279.865 | 432.890 | 0.000265153 |
| 308 | -10.284845 | 15.908402 | -279.865 | 432.890 | 0.000265153 |
| 309 | -10.285164 | 15.90776  | -279.874 | 432.872 | 0.000265143 |
| 310 | -10.285165 | 15.907683 | -279.874 | 432.870 | 0.000265143 |
| 311 | -10.285202 | 15.907769 | -279.875 | 432.873 | 0.000265142 |
| 312 | -10.285203 | 15.907688 | -279.875 | 432.870 | 0.000265142 |
| 313 | -10.285209 | 15.904722 | -279.875 | 432.790 | 0.000265142 |
| 314 | -10.285209 | 15.904723 | -279.875 | 432.790 | 0.000265142 |
| 315 | -10.285213 | 15.904704 | -279.875 | 432.789 | 0.000265142 |
| 316 | -10.285213 | 15.904704 | -279.875 | 432.789 | 0.000265142 |
| 317 | -10.285306 | 15.903434 | -279.878 | 432.755 | 0.00026514  |
| 318 | -10.285306 | 15.903434 | -279.878 | 432.755 | 0.00026514  |
| 319 | -10.285312 | 15.903438 | -279.878 | 432.755 | 0.00026514  |
| 320 | -10.285312 | 15.903438 | -279.878 | 432.755 | 0.00026514  |
| 321 | -10.285736 | 15.903393 | -279.889 | 432.754 | 0.000265127 |
| 322 | -10.285736 | 15.903454 | -279.889 | 432.755 | 0.000265127 |

|     |            |           |          |         |             |
|-----|------------|-----------|----------|---------|-------------|
| 323 | -10.285747 | 15.903407 | -279.890 | 432.754 | 0.000265127 |
| 324 | -10.285748 | 15.903468 | -279.890 | 432.756 | 0.000265127 |
| 325 | -10.286485 | 15.904619 | -279.910 | 432.787 | 0.000265105 |
| 326 | -10.286485 | 15.904629 | -279.910 | 432.787 | 0.000265105 |
| 327 | -10.286493 | 15.904626 | -279.910 | 432.787 | 0.000265105 |
| 328 | -10.286493 | 15.904636 | -279.910 | 432.787 | 0.000265105 |
| 329 | -10.300163 | 15.908548 | -280.282 | 432.894 | 0.000264701 |
| 330 | -10.300164 | 15.908644 | -280.282 | 432.896 | 0.000264701 |
| 331 | -10.3002   | 15.909129 | -280.283 | 432.910 | 0.0002647   |
| 332 | -10.300201 | 15.909118 | -280.283 | 432.909 | 0.0002647   |
| 333 | -10.319195 | 15.908304 | -280.800 | 432.887 | 0.000264143 |
| 334 | -10.319214 | 15.908452 | -280.800 | 432.891 | 0.000264142 |
| 335 | -10.319235 | 15.908322 | -280.801 | 432.888 | 0.000264141 |
| 336 | -10.319254 | 15.908466 | -280.801 | 432.892 | 0.000264141 |
| 337 | -14.387712 | 21.985679 | -391.510 | 598.261 | 0.000179783 |
| 338 | -14.387713 | 21.985407 | -391.510 | 598.254 | 0.000179782 |
| 339 | -14.455646 | 21.97864  | -393.358 | 598.070 | 0.000178807 |
| 340 | -14.455708 | 21.978642 | -393.360 | 598.070 | 0.000178806 |

---

#### 4.4 Calculated energies for fullerophyrin metal complexes

**Supplementary Table 11. Comparison of orbital energies for FP, Pb@(FP), Pb@(FP-Pb) and (FP-Pb).** Calculated at density functional B3LYP-D3/6-31G(d)/LANL2DZ>Kr level of theory; HLG = HOMO-LUMO gap.

|                    | FP           | Pb@(FP)      | Pb@(FP-Pb)   | (FP-Pb)      |
|--------------------|--------------|--------------|--------------|--------------|
| <i>E</i> (hartree) | -4033.305437 | -4036.810256 | -4038.884915 | -4035.662244 |
| LUMO+2 (eV)        | -3.29        | -2.65        | -3.19        | -3.33        |
| LUMO+1 (eV)        | -3.49        | -3.38        | -3.71        | -3.33        |
| <b>LUMO (eV)</b>   | <b>-3.71</b> | <b>-3.80</b> | <b>-3.71</b> | <b>-3.65</b> |
| <b>HOMO (eV)</b>   | <b>-4.72</b> | <b>-4.60</b> | <b>-4.45</b> | <b>-4.63</b> |
| HOMO-1 (eV)        | -5.34        | -4.72        | -4.47        | -5.25        |
| HOMO-2 (eV)        | -5.71        | -5.34        | -5.34        | -5.60        |
| HOMO-3 (eV)        | -5.75        | -5.63        | -5.69        | -5.69        |
| HOMO-4 (eV)        | -5.81        | -5.86        | -5.71        | -5.70        |
| HOMO-5 (eV)        | -6.05        | -5.97        | -5.92        | -5.97        |
| HOMO-6 (eV)        | -6.30        | -6.21        | -6.09        | -6.22        |
| HOMO-7 (eV)        | -6.32        | -6.23        | -6.11        | -6.23        |
| HOMO-8 (eV)        | -6.42        | -6.29        | -6.14        | -6.34        |
| HOMO-9 (eV)        | -6.58        | -6.31        | -6.27        | -6.51        |
| HLG (eV)           | 1.01         | 0.80         | 0.74         | 0.98         |

**Supplementary Table 12. Comparison of orbital energies for FP, Pb@(FP), Pb@(FP-Pb) and (FP-Pb).** Calculated at density functional B3LYP/6-31G(d)/LANL2DZ>Kr level of theory; HLG = HOMO-LUMO gap.

|                    | FP           | Pb@(FP)      | Pb@(FP-Pb)   | (FP-Pb)      |
|--------------------|--------------|--------------|--------------|--------------|
| <i>E</i> (hartree) | -4033.094332 | -4036.544549 | -4038.881993 | -4035.449076 |
| LUMO+2 (eV)        | -3.25        | -2.71        | -3.15        | -3.32        |
| LUMO+1 (eV)        | -3.45        | -3.48        | -3.68        | -3.32        |
| <b>LUMO (eV)</b>   | <b>-3.65</b> | <b>-3.83</b> | <b>-3.69</b> | <b>-3.65</b> |
| <b>HOMO (eV)</b>   | <b>-4.71</b> | <b>-4.53</b> | <b>-4.43</b> | <b>-4.61</b> |
| HOMO-1 (eV)        | -5.34        | -4.76        | -4.47        | -5.25        |
| HOMO-2 (eV)        | -5.73        | -5.38        | -5.31        | -5.60        |
| HOMO-3 (eV)        | -5.74        | -5.70        | -5.68        | -5.70        |
| HOMO-4 (eV)        | -5.83        | -5.91        | -5.71        | -5.70        |
| HOMO-5 (eV)        | -6.06        | -6.04        | -5.90        | -5.97        |
| HOMO-6 (eV)        | -6.31        | -6.27        | -6.08        | -6.22        |
| HOMO-7 (eV)        | -6.33        | -6.29        | -6.11        | -6.22        |
| HOMO-8 (eV)        | -6.41        | -6.29        | -6.13        | -6.34        |
| HOMO-9 (eV)        | -6.60        | -6.37        | -6.26        | -6.54        |
| HLG (eV)           | 1.06         | 0.70         | 0.74         | 0.96         |

**Supplementary Table 13. Comparison of orbital energies for FP, Pb@(FP), Pb@(FP-Pb) and (FP-Pb).** Calculated at density functional B97-D3(BJ)/6-31G(d) level of theory; HLG = HOMO-LUMO gap.

|                    | FP           | Pb@(FP) | Pb@(FP-Pb)   | (FP-Pb)      |
|--------------------|--------------|---------|--------------|--------------|
| <i>E</i> (hartree) | -4031.826859 | --      | -4037.617615 | -4034.179041 |
| LUMO+2 (eV)        | -3.35        | --      | -3.25        | -3.40        |
| LUMO+1 (eV)        | -3.56        | --      | -3.70        | -3.40        |
| <b>LUMO (eV)</b>   | -3.79        | --      | -3.80        | -3.73        |
| <b>HOMO (eV)</b>   | -4.73        | --      | -4.49        | -4.65        |
| HOMO-1 (eV)        | -5.37        | --      | -4.54        | -5.29        |
| HOMO-2 (eV)        | -5.74        | --      | -5.36        | -5.64        |
| HOMO-3 (eV)        | -5.78        | --      | -5.70        | -5.73        |
| HOMO-4 (eV)        | -5.84        | --      | -5.74        | -5.73        |
| HOMO-5 (eV)        | -6.08        | --      | -5.94        | -6.01        |
| HOMO-6 (eV)        | -6.31        | --      | -6.09        | -6.25        |
| HOMO-7 (eV)        | -6.34        | --      | -6.14        | -6.25        |
| HOMO-8 (eV)        | -6.44        | --      | -6.16        | -6.37        |
| HOMO-9 (eV)        | -6.62        | --      | -6.30        | -6.56        |
| HLG (eV)           | 0.94         | --      | 0.69         | 0.92         |

**Supplementary Table 14. Comparison of orbital energies for FP, Pb@(FP), Pb@(FP-Pb) and (FP-Pb).** Calculated at density functional PBE0/6-31G(d) level of theory; HLG = HOMO-LUMO gap.

|                    | FP | Pb@(FP)      | Pb@(FP-Pb)   | (FP-Pb)      |
|--------------------|----|--------------|--------------|--------------|
| <i>E</i> (hartree) | -- | -4032.206949 | -4034.554926 | -4031.106969 |
| LUMO+2 (eV)        | -- | -2.80        | -3.08        | -3.43        |
| LUMO+1 (eV)        | -- | -3.59        | -3.81        | -3.43        |
| <b>LUMO (eV)</b>   | -- | <b>-3.96</b> | <b>-3.83</b> | <b>-3.77</b> |
| <b>HOMO (eV)</b>   | -- | <b>-4.82</b> | <b>-4.72</b> | <b>-4.90</b> |
| HOMO-1 (eV)        | -- | -5.07        | -4.74        | -5.58        |
| HOMO-2 (eV)        | -- | -5.72        | -5.64        | -5.93        |
| HOMO-3 (eV)        | -- | -6.05        | -6.02        | -6.04        |
| HOMO-4 (eV)        | -- | -6.27        | -6.05        | -6.04        |
| HOMO-5 (eV)        | -- | -6.4         | -6.25        | -6.32        |
| HOMO-6 (eV)        | -- | -6.64        | -6.43        | -6.60        |
| HOMO-7 (eV)        | -- | -6.65        | -6.47        | -6.60        |
| HOMO-8 (eV)        | -- | -6.67        | -6.5         | -6.71        |
| HOMO-9 (eV)        | -- | -6.75        | -6.64        | -6.92        |
| HLG (eV)           | -- | 0.86         | 0.89         | 1.13         |

**Supplementary Table 15. Comparison of orbital energies and metal atom charges for FP, Zn@(FP), Zn@(FP-Zn) and (FP-Zn).** Calculated at density functional B3LYP-D3/6-311G(2d,p)// $\omega$ B97X-D/6-31G(d). level of theory; HLG = HOMO-LUMO gap.

|                    |                       | <b>FP</b>    | <b>Zn@(FP)</b> | <b>Zn@(FP-Zn)</b> | <b>(FP-Zn)</b> |
|--------------------|-----------------------|--------------|----------------|-------------------|----------------|
| <i>E</i> (hartree) |                       | -4034.189835 | -5813.67335    | -7591.997162      | -5812.513487   |
| Energy (eV)        | LUMO+2                | -3.49        | -3.49          | -3.56             | -3.55          |
|                    | LUMO+1                | -3.69        | -3.69          | -3.56             | -3.55          |
|                    | <b>LUMO</b>           | <b>-3.89</b> | <b>-3.89</b>   | <b>-3.91</b>      | <b>-3.89</b>   |
|                    | <b>HOMO</b>           | <b>-4.93</b> | <b>-4.93</b>   | <b>-4.91</b>      | <b>-4.90</b>   |
|                    | HOMO-1                | -5.55        | -5.55          | -5.54             | -5.52          |
|                    | HOMO-2                | -5.95        | -5.95          | -5.98             | -6.00          |
|                    | HOMO-3                | -5.98        | -5.98          | -6.01             | -6.00          |
|                    | HOMO-4                | -6.05        | -6.05          | -6.01             | -6.03          |
|                    | HOMO-5                | -6.27        | -6.26          | -6.26             | -6.24          |
|                    | HOMO-6                | -6.52        | -6.52          | -6.53             | -6.52          |
| HOMO-7             | -6.55                 | -6.53        | -6.53          | -6.52             |                |
| HOMO-8             | -6.62                 | -6.54        | -6.62          | -6.60             |                |
| HOMO-9             | -6.83                 | -6.61        | -6.82          | -6.80             |                |
| HLG                |                       | 1.04         | 1.04           | 1.00              | 1.01           |
| Zn(1)              | <b>Natural charge</b> | --           | --             | <b>1.551</b>      | <b>1.593</b>   |
|                    | Mulliken charge       | --           | --             | 0.740             | 0.670          |
|                    | Electrost. charge     | --           | --             | 1.018             | 1.295          |
| Zn(2)              | <b>Natural charge</b> | --           | <b>-0.010</b>  | <b>0.053</b>      | --             |
|                    | Mulliken charge       | --           | -0.018         | 0.061             | --             |
|                    | Electrost. charge     | --           | 0.369          | 0.363             | --             |

**Supplementary Table 16. Comparison of orbital energies and metal atom charges for FP, Zn@(FP), Zn@(FP-Zn) and (FP-Zn).** Calculated at density functional B3LYP-D3/6-311G(d,p)// $\omega$ B97X-D/6-31G(d). level of theory; HLG = HOMO-LUMO gap.

|                    |                       | <b>FP</b>    | <b>Zn@(FP)</b> | <b>Zn@(FP-Zn)</b> | <b>(FP-Zn)</b> |
|--------------------|-----------------------|--------------|----------------|-------------------|----------------|
| <i>E</i> (hartree) |                       | -4034.056949 | -5813.540205   | -7591.865589      | -5812.381392   |
| Energy (eV)        | LUMO+2                | -3.66        | -3.66          | -3.72             | -3.71          |
|                    | LUMO+1                | -3.86        | -3.86          | -3.72             | -3.72          |
|                    | <b>LUMO</b>           | <b>-4.06</b> | <b>-4.06</b>   | <b>-4.08</b>      | <b>-4.06</b>   |
|                    | <b>HOMO</b>           | <b>-5.10</b> | <b>-5.10</b>   | <b>-5.08</b>      | <b>-5.07</b>   |
|                    | HOMO-1                | -5.73        | -5.72          | -5.71             | -5.70          |
|                    | HOMO-2                | -6.12        | -6.12          | -6.15             | -6.17          |
|                    | HOMO-3                | -6.15        | -6.15          | -6.19             | -6.17          |
|                    | HOMO-4                | -6.22        | -6.22          | -6.19             | -6.20          |
|                    | HOMO-5                | -6.44        | -6.43          | -6.44             | -6.42          |
|                    | HOMO-6                | -6.69        | -6.67          | -6.70             | -6.69          |
| HOMO-7             | -6.72                 | -6.69        | -6.70          | -6.69             |                |
| HOMO-8             | -6.79                 | -6.72        | -6.79          | -6.77             |                |
| HOMO-9             | -7.00                 | -6.79        | -6.99          | -6.97             |                |
| HLG                |                       | 1.04         | 1.04           | 1.00              | 1.01           |
| Zn(1)              | <b>Natural charge</b> | --           | --             | <b>1.550</b>      | <b>1.594</b>   |
|                    | Mulliken charge       | --           | --             | 0.974             | 0.903          |
|                    | Electrost. charge     | --           | --             | 1.047             | 1.326          |
| Zn(2)              | <b>Natural charge</b> | --           | <b>-0.011</b>  | <b>0.053</b>      | <b>1.594</b>   |
|                    | Mulliken charge       | --           | 0.002          | 0.088             | 0.903          |
|                    | Electrost. charge     | --           | 0.395          | 0.389             | 1.326          |

**Supplementary Table 17. Comparison of orbital energies and metal atom charges for FP, Zn@(FP), Zn@(FP-Zn) and (FP-Zn).** Calculated at density functional  $\omega$ B97X-D/6-311G(d,p)//6-31G(d). level of theory; HLG = HOMO-LUMO gap.

|                    |                       | <b>FP</b>    | <b>Zn@(FP)</b> | <b>Zn@(FP-Zn)</b> | <b>(FP-Zn)</b> |
|--------------------|-----------------------|--------------|----------------|-------------------|----------------|
| <i>E</i> (hartree) |                       | -4032.513742 | -5811.985069   | -7590.31525       | -5810.843729   |
| Energy (eV)        | LUMO+2                | -2.51        | -2.51          | -2.61             | -2.60          |
|                    | LUMO+1                | -2.82        | -2.82          | -2.61             | -2.60          |
|                    | <b>LUMO</b>           | <b>-2.84</b> | <b>-2.84</b>   | <b>-2.86</b>      | <b>-2.85</b>   |
|                    | <b>HOMO</b>           | <b>-6.31</b> | <b>-6.31</b>   | <b>-6.29</b>      | <b>-6.28</b>   |
|                    | HOMO-1                | -7.35        | -7.35          | -7.34             | -7.33          |
|                    | HOMO-2                | -7.67        | -7.68          | -7.69             | -7.74          |
|                    | HOMO-3                | -7.76        | -7.76          | -7.83             | -7.81          |
|                    | HOMO-4                | -7.87        | -7.87          | -7.83             | -7.81          |
|                    | HOMO-5                | -8.18        | -8.17          | -8.17             | -8.15          |
|                    | HOMO-6                | -8.57        | -8.57          | -8.58             | -8.57          |
| HOMO-7             | -8.60                 | -8.60        | -8.58          | -8.57             |                |
| HOMO-8             | -8.71                 | -8.63        | -8.71          | -8.69             |                |
| HOMO-9             | -8.89                 | -8.70        | -8.84          | -8.88             |                |
| HLG                |                       | <b>3.47</b>  | <b>3.47</b>    | <b>3.43</b>       | <b>3.43</b>    |
| Zn(1)              | <b>Natural charge</b> | --           | --             | <b>1.583</b>      | <b>1.623</b>   |
|                    | Mulliken charge       | --           | --             | 0.974             | 0.928          |
|                    | Electrost. charge     | --           | --             | 1.067             | 1.341          |
| Zn(2)              | <b>Natural charge</b> | --           | <b>-0.011</b>  | <b>0.05</b>       | --             |
|                    | Mulliken charge       | --           | -0.016         | 0.077             | --             |
|                    | Electrost. charge     | --           | 0.390          | 0.380             | --             |

**Supplementary Table 18. Comparison of orbital energies and metal atom charges for FP, Ge@(FP), Ge@(FP-Ge) and (FP-Ge).** Calculated at density functional B3LYP-D3/6-311G(2d,p)// $\omega$ B97X-D/6-31G(d). level of theory; HLG = HOMO-LUMO gap.

|                    |                       | <b>FP</b>    | <b>Ge@(FP)</b> | <b>Ge@(FP-Zn)</b> | <b>(FP-Ge)</b> |
|--------------------|-----------------------|--------------|----------------|-------------------|----------------|
| <i>E</i> (hartree) |                       | -4034.189835 | -6111.183316   | -8187.04          | -6110.026372   |
| <b>Energy (eV)</b> | LUMO+2                | -3.49        | -2.84          | -3.49             | -3.58          |
|                    | LUMO+1                | -3.69        | -3.54          | -3.74             | -3.58          |
|                    | <b>LUMO</b>           | <b>-3.89</b> | <b>-3.98</b>   | <b>-3.96</b>      | <b>-3.89</b>   |
|                    | <b>HOMO</b>           | <b>-4.93</b> | <b>-4.87</b>   | <b>-5.01</b>      | <b>-4.90</b>   |
|                    | HOMO-1                | -5.55        | -4.94          | -5.17             | -5.53          |
|                    | HOMO-2                | -5.95        | -5.53          | -5.61             | -5.91          |
|                    | HOMO-3                | -5.98        | -5.88          | -5.95             | -6.00          |
|                    | HOMO-4                | -6.05        | -6.10          | -6.04             | -6.00          |
|                    | HOMO-5                | -6.27        | -6.18          | -6.10             | -6.24          |
|                    | HOMO-6                | -6.52        | -6.42          | -6.29             | -6.51          |
| HOMO-7             | -6.55                 | -6.45        | -6.55          | -6.51             |                |
| HOMO-8             | -6.62                 | -6.47        | -6.57          | -6.60             |                |
| HOMO-9             | -6.83                 | -6.51        | -6.63          | -6.82             |                |
| HLG                |                       | 1.04         | 0.89           | 1.05              | 1.01           |
| <b>Ge(1)</b>       | <b>Natural charge</b> | --           | --             | <b>0.687</b>      | <b>1.175</b>   |
|                    | Mulliken charge       | --           | --             | 0.465             | 0.785          |
|                    | Electrost. charge     | --           | --             | -0.046            | -0.012         |
| <b>Ge(2)</b>       | <b>Natural charge</b> | --           | <b>1.225</b>   | <b>0.757</b>      | --             |
|                    | Mulliken charge       | --           | 0.841          | 0.621             | --             |
|                    | Electrost. charge     | --           | 0.451          | 0.124             | --             |



**Supplementary Table 19. Comparison of orbital energies and metal atom charges for FP, Ge@(FP), Ge@(FP-Ge) and (FP-Ge).** Calculated at density functional  $\omega$ B97X-D/6-31G(d). level of theory; HLG = HOMO-LUMO gap.

|                    |                       | <b>FP</b>    | <b>Ge@(FP)</b> | <b>Ge@(FP-Zn)</b> | <b>(FP-Ge)</b> |
|--------------------|-----------------------|--------------|----------------|-------------------|----------------|
| <i>E</i> (hartree) |                       | -4031.804    | -6108.589678   | -8184.220919      | -6107.429824   |
| <b>Energy (eV)</b> | LUMO+2                | -2.15        | -1.27          | -2.22             | -2.29          |
|                    | LUMO+1                | -2.47        | -2.09          | -2.43             | -2.29          |
|                    | <b>LUMO</b>           | <b>-2.49</b> | <b>-2.66</b>   | <b>-2.59</b>      | <b>-2.49</b>   |
|                    | <b>HOMO</b>           | <b>-5.99</b> | <b>-6.13</b>   | <b>-6.16</b>      | <b>-5.95</b>   |
|                    | HOMO-1                | -7.03        | -6.30          | -6.54             | -7.01          |
|                    | HOMO-2                | -7.33        | -7.02          | -7.09             | -7.32          |
|                    | HOMO-3                | -7.43        | -7.34          | -7.36             | -7.49          |
|                    | HOMO-4                | -7.55        | -7.61          | -7.54             | -7.49          |
|                    | HOMO-5                | -7.86        | -7.77          | -7.62             | -7.83          |
|                    | HOMO-6                | -8.25        | -8.12          | -7.89             | -8.24          |
|                    | HOMO-7                | -8.28        | -8.16          | -8.30             | -8.24          |
|                    | HOMO-8                | -8.40        | -8.19          | -8.30             | -8.38          |
| HOMO-9             | -8.56                 | -8.29        | -8.42          | -8.51             |                |
| HLG                |                       | <b>3.50</b>  | <b>3.47</b>    | <b>3.57</b>       | <b>3.46</b>    |
| <b>Ge(1)</b>       | <b>Natural charge</b> | --           | --             | <b>0.745</b>      | <b>1.280</b>   |
|                    | Mulliken charge       | --           | --             | 0.363             | 0.792          |
|                    | Electrost. charge     | --           | --             | -0.067            | 0.072          |
| <b>Ge(2)</b>       | <b>Natural charge</b> | --           | <b>1.301</b>   | <b>0.777</b>      | --             |
|                    | Mulliken charge       | --           | 0.796          | 0.386             | --             |
|                    | Electrost. charge     | --           | 0.431          | 0.035             | --             |

## 4.5 XYZ Coordinates from thermochemistry

### Precursor 0

|   |           |           |           |   |           |           |           |
|---|-----------|-----------|-----------|---|-----------|-----------|-----------|
| C | -2.398961 | 0.245371  | -2.426389 | C | -3.416381 | 0.149153  | -3.512171 |
| C | 2.398885  | 0.244799  | 2.426312  | C | -5.449365 | 0.942375  | -4.582711 |
| C | -2.398961 | 0.245372  | 2.426389  | H | -2.439132 | -1.518950 | -4.440332 |
| C | -2.811665 | -0.108628 | 1.141250  | H | -4.593621 | 1.797305  | -2.801700 |
| C | -4.070101 | -0.689961 | 0.706360  | H | -4.593621 | 1.797305  | 2.801700  |
| C | -4.070101 | -0.689962 | -0.706361 | C | -4.493943 | 1.032170  | 3.567120  |
| C | -2.811665 | -0.108628 | -1.141250 | C | -4.216029 | -0.964370 | 5.519088  |
| N | -2.098715 | 0.134210  | 0.000000  | C | -5.449365 | 0.942376  | 4.582711  |
| C | 2.811492  | -0.109281 | 1.141266  | C | -3.416381 | 0.149153  | 3.512171  |
| C | 4.070308  | -0.689972 | 0.706351  | C | -3.285686 | -0.839297 | 4.486225  |
| C | 4.070308  | -0.689972 | -0.706351 | C | -5.313733 | -0.066361 | 5.572696  |
| C | 2.811492  | -0.109281 | -1.141266 | H | -2.439132 | -1.518949 | 4.440332  |
| N | 2.098165  | 0.132518  | 0.000000  | C | 1.410494  | 1.716770  | 5.176375  |
| C | 1.094644  | 0.631458  | -2.787713 | H | 2.492120  | 1.751639  | 5.186941  |
| C | 0.701785  | 1.180588  | -4.095255 | C | -1.410302 | 1.717544  | 5.176177  |
| C | -0.701737 | 1.180887  | -4.095212 | H | -2.491912 | 1.753013  | 5.186586  |
| C | -1.094778 | 0.631903  | -2.787690 | C | -0.699524 | 2.236281  | 6.247610  |
| N | -0.000031 | 0.412067  | -2.017034 | H | -1.238426 | 2.658924  | 7.090398  |
| C | 1.094644  | 0.631458  | 2.787713  | C | 0.699843  | 2.235843  | 6.247733  |
| C | 0.701785  | 1.180588  | 4.095255  | H | 1.238866  | 2.658106  | 7.090633  |
| C | -0.701737 | 1.180887  | 4.095212  | C | -1.410303 | 1.717544  | -5.176177 |
| C | -1.094778 | 0.631903  | 2.787690  | H | -2.491912 | 1.753013  | -5.186586 |
| N | -0.000031 | 0.412067  | 2.017034  | C | 1.410494  | 1.716771  | -5.176375 |
| C | 2.398885  | 0.244799  | -2.426312 | H | 2.492120  | 1.751639  | -5.186941 |
| H | 1.138332  | 0.460766  | 0.000000  | C | 0.699843  | 2.235843  | -6.247733 |
| H | -1.139147 | 0.463209  | 0.000000  | H | 1.238866  | 2.658107  | -7.090633 |
| C | 3.416353  | 0.148712  | 3.512092  | C | -0.699524 | 2.236281  | -6.247610 |
| C | 5.313654  | -0.066241 | 5.572711  | H | -1.238426 | 2.658924  | -7.090398 |
| C | 4.493009  | 1.032775  | 3.567710  | C | 5.139282  | -1.268172 | 1.412484  |
| C | 3.286562  | -0.840525 | 4.485477  | H | 5.143621  | -1.310832 | 2.492964  |
| C | 4.216980  | -0.965421 | 5.518316  | C | 5.139282  | -1.268172 | -1.412484 |
| C | 5.448341  | 0.943330  | 4.583414  | H | 5.143622  | -1.310831 | -2.492964 |
| H | 4.591980  | 1.798519  | 2.802804  | C | 6.188133  | -1.816857 | -0.702273 |
| H | 2.440719  | -1.521034 | 4.438995  | H | 7.015411  | -2.270609 | -1.239460 |
| C | 4.216980  | -0.965421 | -5.518316 | C | 6.188133  | -1.816858 | 0.702273  |
| C | 4.493009  | 1.032775  | -3.567710 | H | 7.015410  | -2.270610 | 1.239460  |
| C | 5.313654  | -0.066241 | -5.572711 | C | -5.138659 | -1.269007 | 1.412489  |
| C | 3.286562  | -0.840524 | -4.485478 | H | -5.142896 | -1.311806 | 2.492962  |
| C | 3.416353  | 0.148712  | -3.512092 | C | -6.187090 | -1.818438 | 0.702290  |
| C | 5.448341  | 0.943330  | -4.583414 | H | -7.014027 | -2.272833 | 1.239460  |
| H | 2.440718  | -1.521034 | -4.438996 | C | -5.138658 | -1.269008 | -1.412489 |
| H | 4.591980  | 1.798519  | -2.802804 | H | -5.142895 | -1.311808 | -2.492962 |
| C | -4.216029 | -0.964371 | -5.519088 | C | -6.187090 | -1.818439 | -0.702290 |
| C | -4.493943 | 1.032170  | -3.567120 | H | -7.014027 | -2.272833 | -1.239460 |
| C | -5.313733 | -0.066362 | -5.572696 | C | -6.278228 | -0.179082 | -6.618611 |
| C | -3.285686 | -0.839298 | -4.486225 | C | -8.169915 | -0.401535 | -8.666806 |

|   |           |           |           |   |           |           |           |
|---|-----------|-----------|-----------|---|-----------|-----------|-----------|
| C | -6.137349 | -1.187636 | -7.608059 | H | 8.904167  | -0.487017 | 9.462111  |
| C | -7.378197 | 0.716965  | -6.668771 | C | -7.491758 | 1.729040  | 5.649521  |
| C | -8.312861 | 0.588083  | -7.700846 | H | -8.337601 | 2.410115  | 5.692740  |
| C | -7.094174 | -1.281136 | -8.623194 | C | -6.575962 | 1.837496  | 4.659200  |
| H | -9.156953 | 1.271541  | -7.741701 | H | -6.675558 | 2.605276  | 3.896701  |
| H | -6.989295 | -2.051646 | -9.382547 | C | -4.097170 | -1.976435 | 6.537148  |
| H | -8.904693 | -0.488610 | -9.461530 | H | -3.250601 | -2.655906 | 6.489922  |
| C | -6.278228 | -0.179082 | 6.618611  | C | -5.010016 | -2.081579 | 7.529995  |
| C | -8.169914 | -0.401535 | 8.666806  | H | -4.907567 | -2.848728 | 8.292996  |
| C | -7.378197 | 0.716965  | 6.668770  | C | -6.575962 | 1.837496  | -4.659201 |
| C | -6.137348 | -1.187636 | 7.608059  | H | -6.675558 | 2.605276  | -3.896702 |
| C | -7.094174 | -1.281136 | 8.623194  | C | -7.491757 | 1.729040  | -5.649522 |
| C | -8.312861 | 0.588083  | 7.700846  | H | -8.337601 | 2.410115  | -5.692740 |
| H | -6.989294 | -2.051646 | 9.382547  | C | -4.097170 | -1.976435 | -6.537148 |
| H | -9.156953 | 1.271540  | 7.741700  | H | -3.250601 | -2.655907 | -6.489922 |
| H | -8.904693 | -0.488610 | 9.461530  | C | -5.010016 | -2.081580 | -7.529995 |
| C | 6.278061  | -0.178618 | -6.618744 | H | -4.907567 | -2.848729 | -8.292995 |
| C | 8.169488  | -0.400271 | -8.667259 | C | 6.573844  | 1.839722  | -4.660762 |
| C | 6.138169  | -1.188054 | -7.607471 | H | 6.672763  | 2.608103  | -3.898784 |
| C | 7.376920  | 0.718701  | -6.669784 | C | 7.489507  | 1.731639  | -5.651247 |
| C | 8.311485  | 0.590195  | -7.702002 | H | 8.334560  | 2.413654  | -5.695155 |
| C | 7.094837  | -1.281139 | -8.622771 | C | 5.011987  | -2.083317 | -7.528503 |
| H | 9.154743  | 1.274642  | -7.743532 | H | 4.910261  | -2.851159 | -8.290895 |
| H | 6.990692  | -2.052297 | -9.381562 | C | 4.099188  | -1.978433 | -6.535589 |
| H | 8.904167  | -0.487017 | -9.462111 | H | 3.253421  | -2.658862 | -6.487689 |
| C | 6.278061  | -0.178618 | 6.618745  | C | 4.099188  | -1.978433 | 6.535589  |
| C | 8.169488  | -0.400271 | 8.667260  | H | 3.253422  | -2.658863 | 6.487688  |
| C | 7.376920  | 0.718702  | 6.669785  | C | 5.011988  | -2.083318 | 7.528502  |
| C | 6.138170  | -1.188054 | 7.607471  | H | 4.910261  | -2.851160 | 8.290894  |
| C | 7.094838  | -1.281139 | 8.622771  | C | 7.489507  | 1.731640  | 5.651247  |
| C | 8.311485  | 0.590196  | 7.702003  | H | 8.334560  | 2.413655  | 5.695156  |
| H | 6.990692  | -2.052297 | 9.381562  | C | 6.573844  | 1.839723  | 4.660763  |
| H | 9.154742  | 1.274643  | 7.743533  | H | 6.672762  | 2.608103  | 3.898784  |

### Intermediate 1a

|   |           |           |           |   |           |           |           |
|---|-----------|-----------|-----------|---|-----------|-----------|-----------|
| C | -2.345938 | 0.234749  | -2.622309 | C | 1.22474   | 0.370615  | -2.79239  |
| C | 2.050241  | -0.553119 | 2.498783  | C | 0.954257  | 1.131936  | -4.017524 |
| C | -2.641929 | 0.577129  | 2.25515   | C | -0.444627 | 1.19467   | -4.114207 |
| C | -3.006044 | 0.436242  | 0.937791  | C | -0.954991 | 0.459201  | -2.949128 |
| C | -4.358249 | 0.349628  | 0.355533  | N | 0.028286  | 0.072356  | -2.154449 |
| C | -4.177232 | 0.281595  | -1.032702 | C | 0.845797  | 0.02468   | 2.850299  |
| C | -2.787566 | 0.27563   | -1.323819 | C | 0.490471  | 0.547973  | 4.18128   |
| N | -2.128025 | 0.367239  | -0.12447  | C | -0.876584 | 0.860386  | 4.112704  |
| C | 2.484027  | -0.896097 | 1.185277  | C | -1.29091  | 0.528614  | 2.735555  |
| C | 3.647287  | -1.633216 | 0.780596  | N | -0.252324 | 0.113152  | 2.009369  |
| C | 3.777274  | -1.477475 | -0.625164 | C | 2.440596  | -0.106751 | -2.351939 |
| C | 2.684912  | -0.666705 | -1.067353 | H | 1.069871  | 0.12427   | 0.02357   |
| N | 1.932936  | -0.40456  | 0.04104   | H | -1.134132 | 0.22843   | 0.009363  |

|   |           |           |           |   |           |           |            |
|---|-----------|-----------|-----------|---|-----------|-----------|------------|
| C | 3.05675   | -0.804735 | 3.570934  | C | 4.820801  | -2.129146 | -1.320322  |
| C | 4.980376  | -1.263868 | 5.562691  | H | 4.918588  | -2.037282 | -2.394598  |
| C | 4.219405  | -0.03777  | 3.611941  | C | 5.705672  | -2.903523 | -0.610323  |
| C | 2.852814  | -1.803679 | 4.520816  | H | 6.510247  | -3.412246 | -1.132825  |
| C | 3.798162  | -2.049145 | 5.520425  | C | 5.575143  | -3.064316 | 0.78804    |
| C | 5.187471  | -0.246694 | 4.59456   | H | 6.280242  | -3.695882 | 1.319993   |
| H | 4.374564  | 0.732526  | 2.861298  | C | -5.653858 | 0.265877  | 0.854846   |
| H | 1.940766  | -2.393173 | 4.484379  | H | -5.875176 | 0.292578  | 1.913305   |
| C | 4.694496  | -0.782341 | -5.320855 | C | -6.690502 | 0.09322   | -0.067336  |
| C | 4.723616  | 0.720928  | -2.951427 | H | -7.701852 | -0.033905 | 0.306945   |
| C | 5.827611  | 0.007552  | -4.992854 | C | -5.193311 | 0.21308   | -1.986919  |
| C | 3.600575  | -0.795632 | -4.45337  | C | -6.484416 | 0.061017  | -1.444211  |
| C | 3.609819  | -0.053147 | -3.273124 | H | -7.336289 | -0.14091  | -2.07997   |
| C | 5.835118  | 0.769577  | -3.794978 | C | -6.124465 | -0.236233 | -6.885336  |
| H | 2.726755  | -1.393738 | -4.696783 | C | -7.898129 | -0.324936 | -9.054057  |
| H | 4.72742   | 1.289053  | -2.025034 | C | -5.681966 | -0.714073 | -8.14972   |
| C | -3.867967 | -0.580223 | -5.967381 | C | -7.462276 | 0.206034  | -6.732623  |
| C | -4.767793 | 0.166496  | -3.387333 | C | -8.333755 | 0.156979  | -7.82906   |
| C | -5.224102 | -0.196414 | -5.776377 | C | -6.583359 | -0.756645 | -9.21402   |
| C | -2.975489 | -0.425687 | -4.922195 | H | -9.356844 | 0.503597  | -7.708937  |
| C | -3.37346  | 0.016025  | -3.649707 | H | -6.246898 | -1.128688 | -10.178284 |
| C | -5.666444 | 0.211164  | -4.493825 | H | -8.583213 | -0.361873 | -9.895687  |
| H | -1.932186 | -0.666594 | -5.09319  | C | -6.850888 | 1.197977  | 6.091212   |
| H | -4.120951 | 2.78678   | 2.7249    | C | -8.890242 | 1.503572  | 7.980704   |
| C | -4.41146  | 1.958576  | 3.366058  | C | -7.521038 | 2.443286  | 6.216598   |
| C | -5.134148 | -0.200624 | 5.004391  | C | -7.216194 | 0.107193  | 6.923183   |
| C | -5.439262 | 2.132136  | 4.296258  | C | -8.23841  | 0.281583  | 7.861339   |
| C | -3.74316  | 0.740188  | 3.247067  | C | -8.537389 | 2.574948  | 7.167903   |
| C | -4.111448 | -0.328786 | 4.061455  | H | -8.520448 | -0.551257 | 8.50015    |
| C | -5.807712 | 1.042637  | 5.129147  | H | -9.051471 | 3.527305  | 7.26776    |
| H | -3.586241 | -1.275205 | 3.96379   | H | -9.68116  | 1.62267   | 8.715094   |
| C | 1.219671  | 0.833789  | 5.34069   | C | 6.958306  | 0.032846  | -5.863422  |
| H | 2.281495  | 0.641279  | 5.409577  | C | 9.176124  | 0.077362  | -7.566685  |
| C | -1.529541 | 1.437428  | 5.207007  | C | 6.950044  | -0.733349 | -7.058763  |
| H | -2.577271 | 1.701509  | 5.172666  | C | 8.091255  | 0.821892  | -5.532452  |
| C | -0.801824 | 1.697861  | 6.358989  | C | 9.189308  | 0.830357  | -6.398101  |
| H | -1.298098 | 2.14925   | 7.212859  | C | 8.069466  | -0.696877 | -7.895973  |
| C | 0.562484  | 1.402736  | 6.422118  | H | 10.058552 | 1.432761  | -6.147546  |
| H | 1.122745  | 1.629894  | 7.324367  | H | 8.067359  | -1.282784 | -8.811395  |
| C | -1.06434  | 1.956856  | -5.107808 | H | 10.037589 | 0.093799  | -8.227491  |
| H | -2.144401 | 2.033344  | -5.16323  | C | 5.959617  | -1.495326 | 6.574923   |
| C | 1.753119  | 1.823136  | -4.935269 | C | 7.878022  | -1.94773  | 8.559385   |
| H | 2.83414   | 1.812286  | -4.867983 | C | 7.141077  | -0.708731 | 6.612335   |
| C | 1.131271  | 2.557772  | -5.934432 | C | 5.751652  | -2.511677 | 7.543839   |
| H | 1.739713  | 3.101356  | -6.651268 | C | 6.723299  | -2.721189 | 8.527628   |
| C | -0.265669 | 2.628868  | -6.020033 | C | 8.087135  | -0.951568 | 7.612458   |
| H | -0.727368 | 3.227277  | -6.79958  | H | 6.567318  | -3.498427 | 9.271202   |
| C | 4.563004  | -2.448649 | 1.484158  | H | 8.992751  | -0.351485 | 7.643692   |
| H | 4.467817  | -2.609338 | 2.54986   | H | 8.622731  | -2.123151 | 9.329889   |

|   |           |           |           |   |          |           |           |
|---|-----------|-----------|-----------|---|----------|-----------|-----------|
| C | -7.126875 | 3.530139  | 5.356367  | C | 6.99756  | 1.562247  | -3.485614 |
| H | -7.644751 | 4.480226  | 5.45794   | H | 6.994986 | 2.141676  | -2.566397 |
| C | -6.138832 | 3.383093  | 4.443617  | C | 8.068816 | 1.58691   | -4.311652 |
| H | -5.851541 | 4.211615  | 3.801906  | H | 8.940146 | 2.187761  | -4.064831 |
| C | -5.528288 | -1.290605 | 5.859647  | C | 5.784958 | -1.523365 | -7.366475 |
| H | -5.008038 | -2.238896 | 5.756308  | H | 5.785937 | -2.105524 | -8.28422  |
| C | -6.517348 | -1.14354  | 6.771183  | C | 4.712992 | -1.547505 | -6.54129  |
| H | -6.803636 | -1.973967 | 7.411173  | H | 3.84035  | -2.147067 | -6.785548 |
| C | -7.004901 | 0.73721   | -4.401252 | C | 3.614113 | -3.073515 | 6.51679   |
| H | -7.3169   | 1.223339  | -3.486344 | H | 2.706113 | -3.669234 | 6.480346  |
| C | -7.85314  | 0.734696  | -5.459144 | C | 4.542097 | -3.29187  | 7.477376  |
| H | -8.844395 | 1.169514  | -5.360263 | H | 4.388963 | -4.067614 | 8.223043  |
| C | -3.446141 | -1.065021 | -7.257929 | C | 7.323857 | 0.314849  | 5.61485   |
| H | -2.408554 | -1.36457  | -7.377729 | H | 8.231942 | 0.910928  | 5.649468  |
| C | -4.309992 | -1.135613 | -8.293617 | C | 6.395593 | 0.53501   | 4.655949  |
| H | -3.982153 | -1.500448 | -9.263431 | H | 6.545324 | 1.309007  | 3.908183  |

### Intermediate 2a

|   |           |           |           |   |           |           |           |
|---|-----------|-----------|-----------|---|-----------|-----------|-----------|
| C | -2.26316  | -2.515844 | -0.452647 | C | 4.232383  | 3.747785  | -0.486905 |
| C | 2.22451   | 2.490626  | 0.314661  | C | 3.166255  | 4.446253  | 1.559227  |
| C | -2.594893 | 2.360795  | -0.258922 | C | 4.104402  | 5.467504  | 1.726363  |
| C | -2.966489 | 1.029356  | -0.235715 | C | 5.1865    | 4.759923  | -0.363333 |
| C | -4.30663  | 0.437936  | -0.260424 | H | 4.274033  | 3.069996  | -1.335279 |
| C | -4.106921 | -0.937203 | -0.446844 | H | 2.374607  | 4.316254  | 2.292045  |
| C | -2.727862 | -1.212043 | -0.426148 | C | 4.569957  | -5.273933 | 1.633113  |
| N | -2.078791 | -0.025551 | -0.288042 | C | 4.543387  | -3.627981 | -0.640902 |
| C | 2.722939  | 1.203887  | 0.589941  | C | 5.538855  | -5.456735 | 0.611649  |
| C | 4.024231  | 0.842736  | 1.126933  | C | 3.61109   | -4.270072 | 1.487469  |
| C | 4.134817  | -0.566796 | 1.063309  | C | 3.592891  | -3.44886  | 0.36154   |
| C | 2.895854  | -1.072709 | 0.518838  | C | 5.521439  | -4.621362 | -0.536288 |
| N | 2.100037  | 0.017564  | 0.30437   | H | 2.860694  | -4.125928 | 2.260085  |
| C | 1.260671  | -2.838646 | -0.109257 | H | 4.523836  | -2.982277 | -1.514888 |
| C | 0.874349  | -4.241229 | -0.39864  | C | -3.792356 | -5.985102 | -0.610667 |
| C | -0.51811  | -4.19378  | -0.451203 | C | -4.639145 | -3.293091 | -0.760766 |
| C | -0.902263 | -2.832774 | -0.314639 | C | -5.136947 | -5.676259 | -0.946973 |
| N | 0.154983  | -2.024764 | -0.129972 | C | -2.819405 | -4.962529 | -0.653896 |
| C | 0.930473  | 2.872592  | -0.070508 | C | -3.248382 | -3.597348 | -0.626328 |
| C | 0.539265  | 4.241376  | -0.4642   | C | -5.535826 | -4.327881 | -1.121665 |
| C | -0.862    | 4.219587  | -0.565744 | H | -4.112227 | 2.967732  | -2.394678 |
| C | -1.256739 | 2.83335   | -0.27832  | C | -4.415612 | 3.524558  | -1.512112 |
| N | -0.171867 | 2.06558   | -0.038043 | C | -5.177302 | 4.935629  | 0.7892    |
| C | 2.537427  | -2.402837 | 0.23265   | C | -5.494092 | 4.407338  | -1.589386 |
| H | 1.1485    | -0.072106 | -0.039053 | C | -3.720825 | 3.337391  | -0.317793 |
| H | -1.076189 | 0.108915  | -0.201461 | C | -4.10323  | 4.041486  | 0.821303  |
| C | 3.227628  | 3.587222  | 0.464524  | C | -5.885446 | 5.122755  | -0.426925 |
| C | 5.128753  | 5.630655  | 0.756653  | H | -3.554685 | 3.892364  | 1.747498  |

|   |            |            |           |   |           |           |           |
|---|------------|------------|-----------|---|-----------|-----------|-----------|
| C | 1.243514   | 5.409015   | -0.789771 | C | 8.460999  | -8.484497 | 0.987612  |
| H | 2.322674   | 5.451175   | -0.771141 | C | 6.538625  | -7.31525  | 1.886585  |
| C | -1.566231  | 5.368342   | -0.949164 | C | 7.49525   | -6.661301 | -0.28261  |
| H | -2.642976  | 5.37587    | -1.037607 | C | 8.453852  | -7.669287 | -0.138296 |
| C | -0.858381  | 6.523055   | -1.240382 | C | 7.514081  | -8.311456 | 1.990797  |
| H | -1.396581  | 7.417465   | -1.539893 | H | 9.197275  | -7.810849 | -0.918416 |
| C | 0.537406   | 6.53899    | -1.170798 | H | 7.526189  | -8.952988 | 2.868029  |
| H | 1.081621   | 7.443989   | -1.42443  | H | 9.212137  | -9.262568 | 1.084578  |
| C | -1.377499  | -5.256216  | -0.700061 | C | 6.100192  | 6.665588  | 0.908927  |
| C | 1.49066    | -5.458433  | -0.68707  | C | 8.007108  | 8.689609  | 1.210378  |
| H | 2.565848   | -5.587195  | -0.69324  | C | 7.123745  | 6.826345  | -0.061714 |
| C | 0.666791   | -6.532941  | -1.034683 | C | 6.043202  | 7.532473  | 2.031688  |
| H | 1.131665   | -7.472997  | -1.31704  | C | 7.006737  | 8.53723   | 2.163639  |
| C | -0.72825   | -6.451863  | -1.0523   | C | 8.066916  | 7.844597  | 0.108101  |
| H | -1.288651  | -7.315483  | -1.389145 | H | 6.967088  | 9.20172   | 3.022775  |
| C | 5.067035   | 1.594831   | 1.70616   | H | 8.851676  | 7.970779  | -0.633196 |
| H | 5.000013   | 2.666809   | 1.815445  | H | 8.74797   | 9.474687  | 1.328076  |
| C | 5.290414   | -1.213091  | 1.544814  | C | -7.279972 | 5.465491  | -2.860045 |
| H | 5.389309   | -2.288373  | 1.515403  | H | -7.828135 | 5.609679  | -3.787337 |
| C | 6.306187   | -0.453841  | 2.082266  | C | -6.23129  | 4.612366  | -2.810092 |
| H | 7.198874   | -0.944777  | 2.457712  | H | -5.924891 | 4.060199  | -3.694309 |
| C | 6.189813   | 0.944104   | 2.16949   | C | -5.59442  | 5.675347  | 1.952835  |
| H | 6.991096   | 1.523464   | 2.618071  | H | -5.045468 | 5.529122  | 2.879073  |
| C | -5.618411  | 0.882081   | -0.078254 | C | -6.641305 | 6.531183  | 1.901283  |
| H | -5.862761  | 1.922051   | 0.096441  | H | -6.944315 | 7.082991  | 2.787197  |
| C | -6.627528  | -0.080094  | -0.067777 | C | -6.834673 | -4.084255 | -1.696007 |
| H | -7.646295  | 0.240508   | 0.12842   | H | -7.08429  | -3.079792 | -2.014249 |
| C | -5.096311  | -1.916694  | -0.530493 | C | -7.714452 | -5.087741 | -1.924943 |
| C | -6.392616  | -1.443954  | -0.278859 | H | -8.67417  | -4.87745  | -2.38954  |
| H | -7.229105  | -2.126587  | -0.193928 | C | -3.499365 | -7.33985  | -0.21098  |
| C | -6.091701  | -6.730553  | -1.113649 | H | -2.534538 | -7.554545 | 0.230628  |
| C | -7.964661  | -8.796717  | -1.438261 | C | -4.423372 | -8.324929 | -0.294149 |
| C | -5.741125  | -8.070576  | -0.804806 | H | -4.183084 | -9.328953 | 0.045565  |
| C | -7.398061  | -6.445854  | -1.588211 | C | 6.517308  | -4.82872  | -1.55669  |
| C | -8.314768  | -7.490136  | -1.753059 | H | 6.498943  | -4.184711 | -2.431718 |
| C | -6.690278  | -9.084614  | -0.963458 | C | 7.454403  | -5.797402 | -1.434999 |
| H | -9.309154  | -7.266408  | -2.130345 | H | 8.199924  | -5.941522 | -2.212601 |
| H | -6.419653  | -10.106591 | -0.711287 | C | 5.541398  | -7.106595 | 2.905741  |
| H | -8.688657  | -9.596107  | -1.56356  | H | 5.557052  | -7.751184 | 3.780617  |
| C | -6.991306  | 6.024048   | -0.480393 | C | 4.606135  | -6.136482 | 2.786236  |
| C | -9.161359  | 7.785753   | -0.584288 | H | 3.85896   | -5.989819 | 3.561355  |
| C | -7.700844  | 6.2048     | -1.696856 | C | 4.069845  | 6.3637    | 2.853879  |
| C | -7.381835  | 6.737956   | 0.682816  | H | 3.281388  | 6.233215  | 3.590026  |
| C | -8.469515  | 7.613976   | 0.609031  | C | 4.991443  | 7.34374   | 2.99843   |
| C | -8.783096  | 7.089405   | -1.726635 | H | 4.953713  | 8.012198  | 3.854533  |
| H | -8.770829  | 8.162349   | 1.497685  | C | 7.154254  | 5.930165  | -1.189728 |
| H | -9.328757  | 7.229593   | -2.656059 | H | 7.939986  | 6.06049   | -1.929221 |
| H | -10.004287 | 8.469033   | -0.62436  | C | 6.234531  | 4.948366  | -1.333641 |
| C | 6.526447   | -6.479605  | 0.738929  | H | 6.270159  | 4.278397  | -2.188334 |

### Intermediate 3d

|   |           |           |           |   |           |           |           |
|---|-----------|-----------|-----------|---|-----------|-----------|-----------|
| C | -2.431228 | -2.26788  | -0.671405 | C | -4.009554 | 4.158832  | -0.95166  |
| C | 2.36174   | 2.291957  | 0.487926  | C | -4.956796 | 5.136657  | 1.501444  |
| C | -2.509983 | 2.537192  | 0.216393  | C | -4.95836  | 5.183248  | -0.955632 |
| C | -2.946125 | 1.255901  | -0.031386 | C | -3.5311   | 3.622572  | 0.243521  |
| C | -4.308086 | 0.773459  | -0.310462 | C | -4.008393 | 4.11054   | 1.458041  |
| C | -4.164293 | -0.57375  | -0.66908  | C | -5.439982 | 5.682991  | 0.283247  |
| C | -2.813527 | -0.954469 | -0.523056 | H | -3.629398 | 3.689547  | 2.385616  |
| N | -2.118256 | 0.157528  | -0.139435 | C | 1.716011  | 5.138     | 0.397327  |
| C | 2.774805  | 0.953855  | 0.80416   | C | -1.123442 | 5.562218  | 0.283369  |
| C | 3.909463  | 0.511635  | 1.555703  | H | -2.184746 | 5.772898  | 0.263575  |
| C | 3.877902  | -0.9074   | 1.583391  | C | -0.209749 | 6.618871  | 0.204334  |
| C | 2.708034  | -1.316576 | 0.86753   | H | -0.589899 | 7.629983  | 0.093325  |
| N | 2.075639  | -0.164696 | 0.480246  | C | 1.168898  | 6.42748   | 0.244053  |
| C | 1.0122    | -2.93357  | 0.032418  | H | 1.803604  | 7.292179  | 0.102815  |
| C | 0.555702  | -4.261653 | -0.427576 | C | -1.704508 | -5.042123 | -1.110441 |
| C | -0.810196 | -4.086418 | -0.644737 | C | 1.114209  | -5.495439 | -0.765818 |
| C | -1.105698 | -2.711701 | -0.41825  | H | 2.169379  | -5.711654 | -0.650158 |
| N | -0.032897 | -2.020006 | -0.044137 | C | 0.266836  | -6.45295  | -1.325581 |
| C | 1.043685  | 2.707849  | 0.425624  | H | 0.692294  | -7.398435 | -1.649236 |
| C | 0.777597  | 4.108524  | 0.389096  | C | -1.105356 | -6.247971 | -1.507722 |
| C | -0.609794 | 4.27182   | 0.353344  | H | -1.67749  | -7.021758 | -2.004763 |
| C | -1.133201 | 2.886169  | 0.354447  | C | 4.891565  | 1.2168    | 2.286966  |
| N | -0.134798 | 1.992043  | 0.411915  | H | 4.892135  | 2.299917  | 2.311254  |
| C | 2.264039  | -2.618754 | 0.522947  | C | 4.863345  | -1.617474 | 2.307967  |
| H | 1.173606  | -0.184465 | 0.012543  | H | 4.854042  | -2.698691 | 2.355237  |
| H | -1.125079 | 0.215585  | 0.07262   | C | 5.828264  | -0.909751 | 2.982783  |
| C | 3.389271  | 3.330051  | 0.262928  | H | 6.586419  | -1.445897 | 3.54573   |
| C | 5.507001  | 5.186253  | 0.042567  | C | 5.838245  | 0.505401  | 2.98106   |
| C | 4.661817  | 2.935188  | -0.17896  | H | 6.597894  | 1.034324  | 3.548516  |
| C | 3.1198    | 4.723456  | 0.399658  | C | -5.594294 | 1.297763  | -0.243255 |
| C | 4.223029  | 5.624321  | 0.450647  | H | -5.792387 | 2.323762  | 0.040394  |
| C | 5.702833  | 3.83179   | -0.342536 | C | -6.657472 | 0.426445  | -0.507003 |
| H | 4.836743  | 1.890842  | -0.411866 | H | -7.671431 | 0.801581  | -0.40555  |
| C | 4.000037  | -5.710103 | 1.871962  | C | -5.187966 | -1.451239 | -1.012779 |
| C | 4.362484  | -3.791206 | -0.142704 | C | -6.479584 | -0.908461 | -0.870831 |
| C | 5.132066  | -5.7798   | 1.017827  | H | -7.359619 | -1.52773  | -0.992661 |
| C | 3.075757  | -4.677689 | 1.694203  | C | -6.403963 | -6.072271 | -2.289771 |
| C | 3.251712  | -3.720933 | 0.695854  | C | -8.33622  | -7.93753  | -3.106854 |
| C | 5.309351  | -4.807226 | -0.00097  | C | -6.187114 | -7.461155 | -2.093653 |
| H | 2.20364   | -4.617581 | 2.339541  | C | -7.607839 | -5.636115 | -2.900136 |
| H | 4.49575   | -3.036124 | -0.91285  | C | -8.555085 | -6.58238  | -3.310607 |
| C | -4.153043 | -5.56916  | -1.403687 | C | -7.163817 | -8.374045 | -2.498022 |
| C | -4.791112 | -2.81939  | -1.356167 | H | -9.468484 | -6.241843 | -3.791135 |
| C | -5.417944 | -5.120527 | -1.874865 | H | -6.997511 | -9.435232 | -2.33219  |
| C | -3.117801 | -4.632265 | -1.212889 | H | -9.082131 | -8.660034 | -3.423676 |
| C | -3.452759 | -3.243831 | -1.088546 | C | -6.406138 | 6.733883  | 0.303541  |
| C | -5.699452 | -3.736413 | -1.945486 | C | -8.297164 | 8.794154  | 0.34326   |
| H | -3.632116 | 3.771455  | -1.894391 | C | -6.887681 | 7.278348  | -0.916201 |

|   |           |           |           |   |           |           |           |
|---|-----------|-----------|-----------|---|-----------|-----------|-----------|
| C | -6.884458 | 7.233875  | 1.543102  | C | -5.460907 | 5.663123  | 2.74403   |
| C | -7.829312 | 8.264747  | 1.54038   | H | -5.085229 | 5.240354  | 3.671809  |
| C | -7.832767 | 8.307764  | -0.873525 | C | -6.375859 | 6.659813  | 2.762803  |
| H | -8.19721  | 8.650439  | 2.48754   | H | -6.746384 | 7.048266  | 3.707774  |
| H | -8.203681 | 8.726916  | -1.805154 | C | -6.885521 | -3.329434 | -2.653247 |
| H | -9.030671 | 9.594535  | 0.358628  | H | -7.023038 | -2.280264 | -2.883615 |
| C | 6.091256  | -6.823672 | 1.183815  | C | -7.786917 | -4.229994 | -3.113936 |
| C | 7.972847  | -8.867064 | 1.511596  | H | -8.655939 | -3.89527  | -3.674164 |
| C | 5.911716  | -7.796608 | 2.201973  | C | -4.011057 | -6.977886 | -1.120972 |
| C | 7.224871  | -6.887757 | 0.331397  | H | -3.136566 | -7.313658 | -0.578352 |
| C | 8.15364   | -7.917002 | 0.512838  | C | -4.975765 | -7.871061 | -1.43811  |
| C | 6.864183  | -8.809953 | 2.348417  | H | -4.854003 | -8.920127 | -1.181635 |
| H | 9.023375  | -7.968152 | -0.136894 | C | 6.468127  | -4.89765  | -0.851795 |
| H | 6.729987  | -9.556576 | 3.126787  | H | 6.596448  | -4.147481 | -1.627347 |
| H | 8.703811  | -9.659771 | 1.639536  | C | 7.378429  | -5.885796 | -0.692679 |
| C | 6.610502  | 6.092992  | -0.003925 | H | 8.249713  | -5.940675 | -1.339947 |
| C | 8.766904  | 7.878862  | -0.108699 | C | 4.750749  | -7.703411 | 3.050285  |
| C | 7.874619  | 5.656257  | -0.487564 | H | 4.618701  | -8.453262 | 3.825848  |
| C | 6.450954  | 7.431319  | 0.435226  | C | 3.842591  | -6.71231  | 2.895016  |
| C | 7.541719  | 8.308943  | 0.378428  | H | 2.971521  | -6.654518 | 3.541933  |
| C | 8.933234  | 6.564328  | -0.537987 | C | 4.122991  | 6.963828  | 0.972466  |
| H | 7.417446  | 9.332497  | 0.722054  | H | 3.206123  | 7.27065   | 1.458362  |
| H | 9.89745   | 6.233234  | -0.914838 | C | 5.176438  | 7.817295  | 0.966357  |
| H | 9.603925  | 8.569221  | -0.152255 | H | 5.073662  | 8.809301  | 1.398396  |
| C | -6.382045 | 6.749211  | -2.1576   | C | 8.023888  | 4.284685  | -0.908421 |
| H | -6.756189 | 7.170777  | -3.086806 | H | 8.993657  | 3.961509  | -1.277363 |
| C | -5.465738 | 5.754119  | -2.177332 | C | 6.992659  | 3.415618  | -0.832541 |
| H | -5.092121 | 5.365005  | -3.120566 | H | 7.11646   | 2.378367  | -1.131616 |

#### Intermediate 4c

|   |           |           |           |   |           |           |           |
|---|-----------|-----------|-----------|---|-----------|-----------|-----------|
| C | -3.066597 | 0.022812  | 1.398204  | C | -1.945731 | 0.09213   | 2.240016  |
| C | 3.066597  | 0.022812  | -1.398204 | N | -0.627304 | 0.065177  | 1.939671  |
| C | -1.443295 | 0.015694  | -3.237703 | C | 1.945731  | 0.09213   | -2.240016 |
| C | -2.320742 | 0.002111  | -2.155812 | C | 2.157093  | 0.083847  | -3.643964 |
| C | -3.775633 | 0.024701  | -2.141322 | C | 0.906543  | 0.000297  | -4.259373 |
| C | -4.141354 | -0.047259 | -0.78728  | C | -0.044298 | 0.031429  | -3.129263 |
| C | -2.983169 | -0.051374 | 0.009055  | N | 0.627304  | 0.065178  | -1.939671 |
| N | -1.918591 | -0.030016 | -0.839103 | C | 1.443295  | 0.015694  | 3.237703  |
| C | 2.98317   | -0.051374 | -0.009055 | H | 0.931675  | -0.005121 | 0.59309   |
| C | 4.141354  | -0.047259 | 0.78728   | H | -0.931675 | -0.005123 | -0.59309  |
| C | 3.775633  | 0.024701  | 2.141322  | C | 4.417091  | 0.020422  | -1.999006 |
| C | 2.320742  | 0.002111  | 2.155812  | C | 6.99972   | 0.022704  | -3.156976 |
| N | 1.918591  | -0.030015 | 0.839103  | C | 5.581073  | -0.104082 | -1.175258 |
| C | 0.044298  | 0.031429  | 3.129263  | C | 4.576175  | 0.14471   | -3.415929 |
| C | -0.906543 | 0.000296  | 4.259374  | C | 5.869378  | 0.357599  | -3.94484  |
| C | -2.157093 | 0.083847  | 3.643964  | C | 6.838584  | -0.313774 | -1.789937 |



|   |           |           |           |   |            |           |            |
|---|-----------|-----------|-----------|---|------------|-----------|------------|
| C | 2.787795  | 1.203848  | 6.578747  | H | -7.461167  | 0.382073  | -0.966985  |
| C | 2.467385  | -1.198931 | 5.164812  | C | -8.305225  | 0.021782  | 3.744326   |
| C | 3.211289  | -0.022884 | 7.154851  | C | -10.863908 | 0.02087   | 4.894999   |
| C | 2.214717  | 1.194885  | 5.304447  | C | -8.494347  | 0.497133  | 5.067973   |
| C | 2.05284   | 0.004743  | 4.598246  | C | -9.420698  | -0.454102 | 3.007975   |
| C | 3.046298  | -1.235957 | 6.435553  | C | -10.687029 | -0.456702 | 3.602388   |
| H | 1.884779  | 2.128076  | 4.855847  | C | -9.778929  | 0.498394  | 5.620607   |
| H | 2.337689  | -2.121747 | 4.605652  | H | -11.535489 | -0.836032 | 3.039068   |
| C | -5.869378 | 0.357599  | 3.94484   | H | -9.920802  | 0.877386  | 6.629322   |
| C | -5.581072 | -0.104082 | 1.175258  | H | -11.853996 | 0.020509  | 5.340611   |
| C | -6.99972  | 0.022704  | 3.156976  | C | -3.801789  | -0.037248 | -8.454601  |
| C | -4.576175 | 0.144711  | 3.415929  | C | -4.960228  | -0.064796 | -10.999905 |
| C | -4.417091 | 0.020422  | 1.999006  | C | -4.2266    | -1.264844 | -9.027366  |
| C | -6.838584 | -0.313774 | 1.789937  | C | -3.964719  | 1.176526  | -9.172888  |
| H | -2.337689 | -2.121746 | -4.605652 | C | -4.545756  | 1.140127  | -10.444183 |
| C | -2.467385 | -1.198931 | -5.164812 | C | -4.803549  | -1.256154 | -10.300941 |
| C | -2.787795 | 1.203848  | -6.578747 | H | -4.671923  | 2.067312  | -10.99699  |
| C | -3.046298 | -1.235957 | -6.435553 | H | -5.13043   | -2.194002 | -10.74219  |
| C | -2.05284  | 0.004744  | -4.598246 | H | -5.409728  | -0.075517 | -11.988194 |
| C | -2.214717 | 1.194886  | -5.304447 | C | 3.801789   | -0.037248 | 8.454601   |
| C | -3.211289 | -0.022884 | -7.154851 | C | 4.960228   | -0.064796 | 10.999906  |
| H | -1.88478  | 2.128076  | -4.855847 | C | 3.964719   | 1.176526  | 9.172888   |
| C | 3.391634  | 0.050614  | -4.279388 | C | 4.2266     | -1.264844 | 9.027366   |
| C | 0.87115   | -0.15953  | -5.643906 | C | 4.803549   | -1.256154 | 10.300941  |
| H | -0.052881 | -0.238564 | -6.202747 | C | 4.545756   | 1.140127  | 10.444183  |
| C | 2.093148  | -0.270007 | -6.313001 | H | 5.130431   | -2.194002 | 10.74219   |
| H | 2.085115  | -0.449927 | -7.384023 | H | 4.671922   | 2.067312  | 10.99699   |
| C | 3.327033  | -0.185149 | -5.663791 | H | 5.409727   | -0.075517 | 11.988195  |
| H | 4.225127  | -0.35313  | -6.245494 | C | 8.305225   | 0.021782  | -3.744326  |
| C | -3.391634 | 0.050614  | 4.279388  | C | 10.863908  | 0.02087   | -4.894999  |
| C | -0.87115  | -0.15953  | 5.643906  | C | 9.420698   | -0.454102 | -3.007975  |
| H | 0.052881  | -0.238564 | 6.202747  | C | 8.494347   | 0.497133  | -5.067973  |
| C | -2.093148 | -0.270007 | 6.313001  | C | 9.778929   | 0.498394  | -5.620607  |
| H | -2.085115 | -0.449927 | 7.384023  | C | 10.687029  | -0.456702 | -3.602388  |
| C | -3.327033 | -0.185149 | 5.663791  | H | 9.920802   | 0.877386  | -6.629323  |
| H | -4.225127 | -0.353129 | 6.245494  | H | 11.535489  | -0.836032 | -3.039068  |
| C | 5.44264   | -0.013    | 0.283408  | H | 11.853996  | 0.02051   | -5.340611  |
| C | 4.796407  | 0.171153  | 3.086912  | C | -4.046401  | -2.479266 | -8.273248  |
| H | 4.599621  | 0.236435  | 4.149518  | H | -4.373898  | -3.414916 | -8.718596  |
| C | 6.099203  | 0.284235  | 2.611585  | C | -3.485275  | -2.466489 | -7.042259  |
| H | 6.899797  | 0.452725  | 3.325666  | H | -3.354509  | -3.389955 | -6.484849  |
| C | 6.429829  | 0.213317  | 1.250605  | C | -2.964858  | 2.419468  | -7.331283  |
| H | 7.461167  | 0.382073  | 0.966985  | H | -2.636327  | 3.353615  | -6.884091  |
| C | -4.796407 | 0.171153  | -3.086912 | C | -3.523613  | 2.405307  | -8.563443  |
| H | -4.59962  | 0.236435  | -4.149517 | H | -3.650966  | 3.330178  | -9.119767  |
| C | -6.099203 | 0.284235  | -2.611585 | C | -7.970695  | -0.885417 | 1.105209   |
| H | -6.899797 | 0.452726  | -3.325666 | H | -7.820301  | -1.328266 | 0.128512   |
| C | -5.44264  | -0.013    | -0.283408 | C | -9.192019  | -0.961295 | 1.685017   |
| C | -6.429829 | 0.213318  | -1.250605 | H | -10.018768 | -1.429722 | 1.157611   |

|   |           |           |          |   |           |           |           |
|---|-----------|-----------|----------|---|-----------|-----------|-----------|
| C | -6.108042 | 0.926303  | 5.248028 | C | 2.964858  | 2.419468  | 7.331284  |
| H | -5.276124 | 1.365268  | 5.784466 | H | 2.636327  | 3.353615  | 6.884091  |
| C | -7.352026 | 1.001976  | 5.77642  | C | 6.108042  | 0.926303  | -5.248028 |
| H | -7.50596  | 1.467285  | 6.74641  | H | 5.276124  | 1.365268  | -5.784466 |
| C | 3.485275  | -2.466489 | 7.042259 | C | 7.352026  | 1.001975  | -5.77642  |
| H | 3.35451   | -3.389955 | 6.484849 | H | 7.50596   | 1.467285  | -6.74641  |
| C | 4.046402  | -2.479266 | 8.273248 | C | 9.192019  | -0.961295 | -1.685017 |
| H | 4.373899  | -3.414916 | 8.718596 | H | 10.018768 | -1.429722 | -1.157611 |
| C | 3.523613  | 2.405307  | 8.563443 | C | 7.970695  | -0.885417 | -1.105209 |
| H | 3.650966  | 3.330178  | 9.119767 | H | 7.820301  | -1.328267 | -0.128512 |

### Intermediate 5b

|   |           |           |           |   |           |           |           |
|---|-----------|-----------|-----------|---|-----------|-----------|-----------|
| C | -2.879292 | -0.52503  | 1.483594  | C | 3.591817  | 0.802431  | 6.85751   |
| C | 2.995593  | 0.049241  | -1.689272 | C | 2.368406  | 1.720143  | 4.970472  |
| C | -1.614033 | -0.194085 | -3.25048  | C | 2.310122  | 0.457867  | 4.384597  |
| C | -2.227522 | -0.463372 | -2.046746 | C | 3.529797  | -0.484807 | 6.261238  |
| C | -3.62605  | -0.649455 | -1.977495 | H | 1.910711  | 2.564187  | 4.461492  |
| C | -3.96778  | -0.79445  | -0.641444 | H | 2.838119  | -1.614509 | 4.563295  |
| C | -2.790904 | -0.667219 | 0.117407  | C | -5.627329 | -0.329827 | 4.075577  |
| N | -1.745966 | -0.52955  | -0.756911 | C | -5.374568 | -0.870847 | 1.306545  |
| C | 2.986002  | 0.104038  | -0.276954 | C | -6.754834 | -0.765192 | 3.320171  |
| C | 4.173306  | 0.265739  | 0.444197  | C | -4.335709 | -0.44612  | 3.524282  |
| C | 3.875889  | 0.443585  | 1.80983   | C | -4.20413  | -0.629968 | 2.105659  |
| C | 2.447215  | 0.298558  | 1.91675   | C | -6.609366 | -1.119444 | 1.959369  |
| N | 1.975863  | 0.125335  | 0.638317  | C | -3.948002 | -0.29412  | -4.317805 |
| C | 0.257736  | 0.081221  | 3.066761  | C | -2.838804 | 0.853403  | -6.660039 |
| C | -0.640952 | -0.01271  | 4.242161  | C | -4.708671 | -0.253417 | -5.523567 |
| C | -1.910224 | -0.165235 | 3.681351  | C | -2.541824 | 0.014222  | -4.37672  |
| C | -1.744848 | -0.230648 | 2.272128  | C | -2.06228  | 0.650947  | -5.533817 |
| N | -0.475118 | -0.083602 | 1.901252  | C | -4.166385 | 0.343219  | -6.685296 |
| C | 1.863352  | 0.022831  | -2.498103 | H | -1.049921 | 1.036808  | -5.534426 |
| C | 2.014691  | -0.18913  | -3.887924 | C | 3.22141   | -0.353134 | -4.554185 |
| C | 0.73956   | -0.366802 | -4.436243 | C | 0.657139  | -0.843572 | -5.742636 |
| C | -0.170433 | -0.130794 | -3.298072 | H | -0.291525 | -1.057355 | -6.222642 |
| N | 0.53015   | 0.047402  | -2.16552  | C | 1.851723  | -1.096583 | -6.424011 |
| C | 1.625979  | 0.277016  | 3.072217  | H | 1.803103  | -1.510867 | -7.426499 |
| H | 0.977605  | 0.0309    | 0.473905  | C | 3.107801  | -0.862622 | -5.859745 |
| H | -0.791234 | -0.288469 | -0.532286 | H | 3.987744  | -1.137266 | -6.429592 |
| C | 4.326914  | 0.000637  | -2.343591 | C | -3.113397 | -0.343124 | 4.353553  |
| C | 6.864129  | -0.124835 | -3.603168 | C | -0.541116 | -0.067574 | 5.631385  |
| C | 5.529587  | 0.033449  | -1.564454 | H | 0.399818  | 0.042225  | 6.157389  |
| C | 4.429686  | -0.100037 | -3.767028 | C | -1.713921 | -0.327574 | 6.34753   |
| C | 5.696406  | 0.047043  | -4.383063 | H | -1.648738 | -0.433051 | 7.426581  |
| C | 6.765661  | -0.237737 | -2.191849 | C | -2.967675 | -0.479935 | 5.745186  |
| C | 3.002402  | 1.91438   | 6.200424  | H | -3.807727 | -0.747026 | 6.374571  |
| C | 2.888936  | -0.63384  | 5.028777  | C | 5.44993   | 0.324092  | -0.12667  |

|   |            |           |            |   |           |           |           |
|---|------------|-----------|------------|---|-----------|-----------|-----------|
| C | 4.939075   | 0.761843  | 2.674731   | C | 10.656655 | -0.294838 | -5.483532 |
| H | 4.793254   | 0.918794  | 3.736096   | C | 9.305451  | -0.495644 | -3.482772 |
| C | 6.195003   | 0.924583  | 2.115428   | C | 8.26613   | 0.071667  | -5.628887 |
| H | 7.017851   | 1.224798  | 2.757216   | C | 9.529145  | 0.020981  | -6.230006 |
| C | 6.459999   | 0.726251  | 0.745032   | C | 10.546697 | -0.556624 | -4.122361 |
| H | 7.46107    | 0.928429  | 0.384139   | H | 9.618003  | 0.229822  | -7.292851 |
| C | -4.540476  | -0.555043 | -3.008186  | H | 11.429613 | -0.811441 | -3.542074 |
| C | -5.886753  | -0.527821 | -2.531852  | H | 11.628804 | -0.338765 | -5.965075 |
| H | -6.700218  | -0.311698 | -3.213707  | C | -6.73785  | -0.778753 | -6.782093 |
| C | -5.258409  | -0.83437  | -0.15178   | H | -7.704534 | -1.2715   | -6.845207 |
| C | -6.226318  | -0.655506 | -1.183899  | C | -6.009931 | -0.857911 | -5.640423 |
| H | -7.2731    | -0.530914 | -0.931811  | H | -6.386531 | -1.456352 | -4.820896 |
| C | -8.041452  | -0.853794 | 3.942759   | C | -2.322146 | 1.529959  | -7.824175 |
| C | -10.561644 | -1.039567 | 5.167429   | H | -1.311282 | 1.926474  | -7.779243 |
| C | -8.232257  | -0.378516 | 5.266519   | C | -3.066137 | 1.658744  | -8.944009 |
| C | -9.139714  | -1.415    | 3.241741   | H | -2.666379 | 2.166557  | -9.817724 |
| C | -10.386328 | -1.509633 | 3.874152   | C | -7.720871 | -1.750154 | 1.299618  |
| C | -9.494456  | -0.471318 | 5.856541   | H | -7.571213 | -2.172332 | 0.313534  |
| H | -11.21897  | -1.955555 | 3.336604   | C | -8.920508 | -1.900395 | 1.911434  |
| H | -9.63612   | -0.09345  | 6.86571    | H | -9.734756 | -2.408596 | 1.401655  |
| H | -11.534775 | -1.112971 | 5.643159   | C | -5.884355 | 0.247474  | 5.374217  |
| C | -4.94077   | 0.459428  | -7.880028  | H | -5.081436 | 0.767679  | 5.8801    |
| C | -6.467359  | 0.694636  | -10.218058 | C | -7.114816 | 0.229873  | 5.934543  |
| C | -6.248423  | -0.083928 | -7.93614   | H | -7.28111  | 0.700232  | 6.900085  |
| C | -4.403115  | 1.120658  | -9.018661  | C | 4.134236  | -1.596139 | 6.950733  |
| C | -5.181712  | 1.230151  | -10.170894 | H | 4.082374  | -2.577863 | 6.488022  |
| C | -6.995787  | 0.04114   | -9.115584  | C | 4.750869  | -1.429021 | 8.143335  |
| H | -4.773672  | 1.740315  | -11.039544 | H | 5.202824  | -2.276501 | 8.65191   |
| H | -7.996295  | -0.381253 | -9.15661   | C | 3.698395  | 3.37561   | 8.018159  |
| H | -7.056624  | 0.788244  | -11.125175 | H | 3.749716  | 4.358621  | 8.4787    |
| C | 4.243248   | 0.97826   | 8.115681   | C | 3.079575  | 3.209308  | 6.826592  |
| C | 5.520072   | 1.322657  | 10.5809    | H | 2.625664  | 4.054626  | 6.316686  |
| C | 4.304807   | 2.266319  | 8.709302   | C | 5.860968  | 0.390601  | -5.772252 |
| C | 4.830323   | -0.135103 | 8.772426   | H | 4.991855  | 0.701742  | -6.338663 |
| C | 5.462867   | 0.058959  | 10.004264  | C | 7.080275  | 0.412406  | -6.361298 |
| C | 4.947451   | 2.416454  | 9.942096   | H | 7.178973  | 0.707517  | -7.402516 |
| H | 5.913145   | -0.791371 | 10.509637  | C | 9.144478  | -0.787692 | -2.085502 |
| H | 4.996347   | 3.401384  | 10.398851  | H | 10.006909 | -1.139993 | -1.52599  |
| H | 6.015238   | 1.456117  | 11.537933  | C | 7.944636  | -0.656572 | -1.473873 |
| C | 8.145872   | -0.182126 | -4.238247  | H | 7.846712  | -0.939274 | -0.433296 |

### Intermediate 6c

|   |           |           |           |   |           |           |           |
|---|-----------|-----------|-----------|---|-----------|-----------|-----------|
| C | -2.899122 | -0.005429 | 1.630835  | C | -3.666075 | -0.449788 | -1.822806 |
| C | 2.908914  | -0.26164  | -1.590968 | C | -3.995237 | -0.437152 | -0.474552 |
| C | -1.656905 | -0.249984 | -3.175636 | C | -2.821489 | -0.215419 | 0.257847  |
| C | -2.275778 | -0.270409 | -1.9261   | N | -1.793797 | -0.148041 | -0.646816 |

|   |           |           |           |   |            |           |            |
|---|-----------|-----------|-----------|---|------------|-----------|------------|
| C | 2.833256  | -0.087027 | -0.212841 | C | 3.034188   | -1.528044 | -5.649824  |
| C | 4.012668  | -0.013455 | 0.540207  | H | 3.898096   | -1.930298 | -6.165857  |
| C | 3.671958  | 0.32569   | 1.842442  | C | -3.133149  | 0.129772  | 4.504133   |
| C | 2.271545  | 0.428902  | 1.905858  | C | -0.553634  | 0.298339  | 5.764214   |
| N | 1.795009  | 0.158238  | 0.647386  | H | 0.397496   | 0.329774  | 6.283482   |
| C | 0.225951  | 0.63417   | 3.209447  | C | -1.716839  | -0.004273 | 6.478132   |
| C | -0.66329  | 0.492998  | 4.386728  | H | -1.634685  | -0.201887 | 7.542821   |
| C | -1.94158  | 0.36266   | 3.828167  | C | -2.979647  | -0.092334 | 5.883086   |
| C | -1.790695 | 0.322814  | 2.423317  | H | -3.819357  | -0.391941 | 6.499117   |
| N | -0.499444 | 0.483335  | 2.065704  | C | 5.310949   | -0.125024 | 0.069439   |
| C | 1.788129  | -0.243117 | -2.432389 | C | 4.591734   | 0.576681  | 2.848968   |
| C | 1.948913  | -0.588    | -3.793755 | C | 5.925365   | 0.582827  | 2.366913   |
| C | 0.670209  | -0.706812 | -4.353673 | H | 6.736663   | 0.918905  | 3.000742   |
| C | -0.237221 | -0.300398 | -3.254615 | C | 6.266713   | 0.254601  | 1.045222   |
| N | 0.485554  | -0.075404 | -2.121636 | H | 7.3103     | 0.363643  | 0.774678   |
| C | 1.639885  | 0.75523   | 3.105459  | C | -4.590924  | -0.555477 | -2.850056  |
| H | 0.809264  | 0.231344  | 0.44644   | C | -5.92658   | -0.509791 | -2.375915  |
| H | -0.817367 | 0.045285  | -0.483125 | H | -6.752622  | -0.420357 | -3.070485  |
| C | 4.248109  | -0.486864 | -2.169944 | C | -5.28691   | -0.507066 | 0.021195   |
| C | 6.802145  | -0.863595 | -3.336111 | C | -6.257458  | -0.482004 | -1.011988  |
| C | 5.429469  | -0.489102 | -1.346651 | H | -7.308868  | -0.37678  | -0.771586  |
| C | 4.373885  | -0.704045 | -3.5811   | C | -8.035538  | -0.495719 | 4.146569   |
| C | 5.660106  | -0.695089 | -4.16368  | C | -10.540369 | -0.723589 | 5.392771   |
| C | 6.668082  | -0.860052 | -1.925554 | C | -8.227986  | -0.002702 | 5.463402   |
| C | 2.820909  | 2.325974  | 6.32277   | C | -9.121555  | -1.104511 | 3.466368   |
| C | 3.992133  | 0.960921  | 4.130086  | C | -10.360212 | -1.218164 | 4.107769   |
| C | 4.176986  | 1.90892   | 6.393942  | C | -9.48519   | -0.1161   | 6.063847   |
| C | 2.05309   | 1.926894  | 5.240587  | H | -11.183763 | -1.699243 | 3.586733   |
| C | 2.570504  | 1.181036  | 4.173512  | H | -9.629774  | 0.275412  | 7.067343   |
| C | 4.752495  | 1.202581  | 5.309561  | H | -11.508704 | -0.812426 | 5.875685   |
| H | 1.016634  | 2.240873  | 5.200661  | C | -5.021067  | -0.312312 | -7.822678  |
| C | -5.641019 | 0.097348  | 4.248278  | C | -6.572639  | -0.421926 | -10.153646 |
| C | -5.393694 | -0.472277 | 1.483452  | C | -6.328694  | -0.857757 | -7.784655  |
| C | -6.756916 | -0.382054 | 3.511601  | C | -4.495803  | 0.17212   | -9.051823  |
| C | -4.350771 | 0.021709  | 3.679111  | C | -5.287616  | 0.112682  | -10.20017  |
| C | -4.225161 | -0.154876 | 2.262248  | C | -7.088243  | -0.906812 | -8.960597  |
| C | -6.607192 | -0.760639 | 2.154658  | H | -4.889516  | 0.489627  | -11.138642 |
| C | -4.007032 | -0.504303 | -4.193457 | H | -8.088965  | -1.329466 | -8.928438  |
| C | -2.912414 | 0.263995  | -6.694258 | H | -7.173048  | -0.460414 | -11.057474 |
| C | -4.771151 | -0.657826 | -5.385104 | C | 4.951117   | 2.234451  | 7.549558   |
| C | -2.603785 | -0.207322 | -4.311475 | C | 6.478075   | 2.885529  | 9.806657   |
| C | -2.128893 | 0.240264  | -5.55148  | C | 4.379968   | 3.007734  | 8.597137   |
| C | -4.236215 | -0.247241 | -6.630636 | C | 6.292589   | 1.789078  | 7.656249   |
| H | -1.116965 | 0.62331   | -5.613319 | C | 7.039412   | 2.121708  | 8.793792   |
| C | 3.159639  | -0.917852 | -4.390008 | C | 5.160211   | 3.325337  | 9.710357   |
| C | 0.586193  | -1.286897 | -5.620061 | H | 8.066047   | 1.774464  | 8.874813   |
| H | -0.360875 | -1.465313 | -6.116679 | H | 4.726929   | 3.922578  | 10.508351  |
| C | 1.77392   | -1.697964 | -6.232319 | H | 7.068452   | 3.141244  | 10.681321  |
| H | 1.715178  | -2.191905 | -7.19765  | C | 8.092165   | -1.047989 | -3.930278  |

|   |           |           |            |   |           |           |           |
|---|-----------|-----------|------------|---|-----------|-----------|-----------|
| C | 10.621302 | -1.410946 | -5.094634  | C | -5.894022 | 0.672867  | 5.546368  |
| C | 9.216589  | -1.353943 | -3.121195  | H | -5.094091 | 1.206377  | 6.044388  |
| C | 8.258914  | -0.928148 | -5.334535  | C | -7.120185 | 0.634403  | 6.11776   |
| C | 9.527431  | -1.102578 | -5.895259  | H | -7.287577 | 1.105595  | 7.082645  |
| C | 10.467453 | -1.540218 | -3.720518  | C | 6.091074  | 0.700723  | 5.487759  |
| H | 9.650254  | -0.99619  | -6.96979   | H | 6.498529  | 0.021428  | 4.750452  |
| H | 11.321652 | -1.788361 | -3.096058  | C | 6.818202  | 0.976009  | 6.598549  |
| H | 11.599014 | -1.551342 | -5.545342  | H | 7.813554  | 0.555039  | 6.714123  |
| C | -6.806278 | -1.375138 | -6.535774  | C | 3.010742  | 3.442858  | 8.474193  |
| H | -7.769861 | -1.877492 | -6.517374  | H | 2.584706  | 4.037045  | 9.278181  |
| C | -6.07075  | -1.279211 | -5.400974  | C | 2.268115  | 3.11614   | 7.393293  |
| H | -6.438041 | -1.751179 | -4.499192  | H | 1.232912  | 3.436926  | 7.3125    |
| C | -2.40547  | 0.754924  | -7.950614  | C | 5.880395  | -0.48728  | -5.573752 |
| H | -1.394623 | 1.153344  | -7.975391  | H | 5.045773  | -0.177964 | -6.190381 |
| C | -3.159499 | 0.713395  | -9.071492  | C | 7.111106  | -0.588516 | -6.127123 |
| H | -2.76738  | 1.083738  | -10.014965 | H | 7.250991  | -0.393906 | -7.187146 |
| C | -7.701201 | -1.454588 | 1.526439   | C | 9.014115  | -1.504194 | -1.709457 |
| H | -7.542947 | -1.910291 | 0.557443   | H | 9.848212  | -1.836028 | -1.096884 |
| C | -8.891421 | -1.624502 | 2.149925   | C | 7.807447  | -1.264234 | -1.143197 |
| H | -9.689009 | -2.178856 | 1.662499   | H | 7.676106  | -1.44501  | -0.084132 |

### Intermediate 7b

|   |           |           |           |   |           |           |           |
|---|-----------|-----------|-----------|---|-----------|-----------|-----------|
| C | -2.804733 | 1.0436    | 1.567377  | H | 0.983332  | 1.594172  | 0.082256  |
| C | 2.973782  | 0.575114  | -1.79571  | H | -0.798213 | 1.10058   | -0.5517   |
| C | -1.659467 | 0.407887  | -3.207826 | C | 4.271887  | 0.095026  | -2.310789 |
| C | -2.244693 | 0.490926  | -1.954316 | C | 6.752051  | -0.667988 | -3.429049 |
| C | -3.609973 | 0.173893  | -1.776002 | C | 5.43152   | -0.057916 | -1.455049 |
| C | -3.897581 | 0.266699  | -0.420421 | C | 4.361892  | -0.245619 | -3.697132 |
| C | -2.740082 | 0.712142  | 0.225421  | C | 5.639137  | -0.420647 | -4.272877 |
| N | -1.751056 | 0.811845  | -0.708866 | C | 6.611693  | -0.60448  | -2.017041 |
| C | 2.936524  | 0.900718  | -0.448709 | C | 2.308547  | 1.296638  | 6.540476  |
| C | 4.056606  | 0.703905  | 0.36259   | C | 3.777058  | 0.97769   | 4.096748  |
| C | 3.684803  | 0.974051  | 1.674246  | C | 3.665182  | 0.880511  | 6.554406  |
| C | 2.353308  | 1.36529   | 1.649366  | C | 1.61563   | 1.37581   | 5.314067  |
| N | 1.920364  | 1.339779  | 0.360005  | C | 2.378253  | 1.356     | 4.093929  |
| C | 0.328668  | 1.891537  | 2.805713  | C | 4.361789  | 0.623067  | 5.336846  |
| C | -0.393354 | 1.779219  | 4.01858   | C | -5.172871 | 0.525387  | 4.473111  |
| C | -1.715946 | 1.606606  | 3.643058  | C | -5.150844 | 0.128735  | 1.643715  |
| C | -1.705924 | 1.603082  | 2.219401  | C | -6.276228 | -0.086877 | 3.81674   |
| N | -0.4808   | 1.827471  | 1.70684   | C | -3.977677 | 0.756117  | 3.764459  |
| C | 1.836115  | 0.571882  | -2.615364 | C | -3.995785 | 0.657338  | 2.326467  |
| C | 1.941614  | 0.028817  | -3.909946 | C | -6.226971 | -0.365237 | 2.423887  |
| C | 0.640426  | -0.132152 | -4.411275 | C | -4.009643 | -0.169663 | -4.105217 |
| C | -0.224756 | 0.424395  | -3.345021 | C | -3.052705 | 0.453917  | -6.706011 |
| N | 0.534753  | 0.814535  | -2.292427 | C | -4.788377 | -0.496756 | -5.252985 |
| C | 1.68519   | 1.631147  | 2.835903  | C | -2.640738 | 0.239938  | -4.302012 |

|   |            |           |            |   |           |           |            |
|---|------------|-----------|------------|---|-----------|-----------|------------|
| C | -2.23851   | 0.59979   | -5.596088  | C | 3.669406  | 1.01798   | 9.028369   |
| C | -4.327093  | -0.155296 | -6.547808  | C | 5.636864  | 0.15052   | 7.862748   |
| H | -1.260826  | 1.049682  | -5.728078  | C | 6.26788   | -0.026514 | 9.097594   |
| C | 3.124825   | -0.434578 | -4.478253  | C | 4.338119  | 0.840759  | 10.244774  |
| C | 0.508934   | -0.867067 | -5.591828  | H | 7.269672  | -0.447001 | 9.12374    |
| H | -0.455226  | -1.086569 | -6.03603   | H | 3.832209  | 1.109144  | 11.168451  |
| C | 1.667653   | -1.377237 | -6.18292   | H | 6.129956  | 0.186427  | 11.231106  |
| H | 1.569045   | -1.98013  | -7.080734  | C | 8.016748  | -1.009095 | -4.009272  |
| C | 2.948294   | -1.183164 | -5.652177  | C | 10.502028 | -1.660495 | -5.143981  |
| H | 3.784739   | -1.677654 | -6.132855  | C | 9.102456  | -1.400184 | -3.183918  |
| C | -2.701614  | 1.077875  | 4.448741   | C | 8.196255  | -0.964989 | -5.416715  |
| C | 0.135784   | 1.420864  | 5.242577   | C | 9.444759  | -1.281804 | -5.961975  |
| C | -0.861122  | 0.893585  | 6.116139   | C | 10.331191 | -1.726852 | -3.766901  |
| H | -0.57725   | 0.491699  | 7.083426   | H | 9.578625  | -1.232115 | -7.039353  |
| C | -2.206161  | 0.734276  | 5.741824   | H | 11.154276 | -2.036334 | -3.128232  |
| H | -2.848815  | 0.2253    | 6.452567   | H | 11.463215 | -1.909873 | -5.582896  |
| C | 5.324473   | 0.30114   | -0.02598   | C | -6.785133 | -1.482981 | -6.264346  |
| C | 4.494492   | 0.857603  | 2.796354   | H | -7.700499 | -2.060913 | -6.167702  |
| C | 5.840671   | 0.64618   | 2.399188   | C | -6.028107 | -1.22497  | -5.169771  |
| H | 6.650423   | 0.714934  | 3.11497    | H | -6.326655 | -1.647354 | -4.219816  |
| C | 6.231143   | 0.389873  | 1.062594   | C | -2.624106 | 0.86692   | -8.018746  |
| H | 7.297619   | 0.29377   | 0.90291    | H | -1.651419 | 1.341953  | -8.114469  |
| C | -4.545266  | -0.155156 | -2.740354  | C | -3.403645 | 0.662706  | -9.102918  |
| C | -5.857664  | -0.242667 | -2.191826  | H | -3.072091 | 0.975888  | -10.089325 |
| H | -6.717952  | -0.32722  | -2.843899  | C | -7.270804 | -1.191312 | 1.873608   |
| C | -5.132866  | 0.051648  | 0.167726   | H | -7.160816 | -1.571694 | 0.867421   |
| C | -6.138046  | -0.145234 | -0.820113  | C | -8.346272 | -1.569769 | 2.603251   |
| H | -7.185284  | -0.167172 | -0.542663  | H | -9.105178 | -2.21128  | 2.163214   |
| C | -7.436237  | -0.447296 | 4.57702    | C | -5.332673 | 0.920282  | 5.85028    |
| C | -9.719282  | -1.143633 | 6.062661   | H | -4.552959 | 1.511829  | 6.314354   |
| C | -7.537957  | -0.09296  | 5.947979   | C | -6.456981 | 0.637396  | 6.546457   |
| C | -8.496502  | -1.169255 | 3.971141   | H | -6.563759 | 0.974053  | 7.57424    |
| C | -9.622931  | -1.511849 | 4.727553   | C | 5.641727  | -0.032055 | 5.439383   |
| C | -8.68528   | -0.438964 | 6.667951   | H | 6.103972  | -0.417873 | 4.542968   |
| H | -10.424843 | -2.073625 | 4.255907   | C | 6.248031  | -0.249604 | 6.628764   |
| H | -8.758925  | -0.152485 | 7.713707   | H | 7.205696  | -0.762082 | 6.665997   |
| H | -10.601338 | -1.410532 | 6.63656    | C | 2.337328  | 1.545314  | 8.966508   |
| C | -5.136319  | -0.394225 | -7.701025  | H | 1.859471  | 1.861318  | 9.889955   |
| C | -6.736165  | -0.844909 | -9.957669  | C | 1.68725   | 1.663645  | 7.78599    |
| C | -6.390475  | -1.04094  | -7.569612  | H | 0.697496  | 2.103904  | 7.761074   |
| C | -4.688552  | 0.018077  | -8.986224  | C | 5.87003   | -0.322007 | -5.691477  |
| C | -5.503132  | -0.212114 | -10.095871 | H | 5.060933  | 0.020735  | -6.325001  |
| C | -7.175273  | -1.260403 | -8.709518  | C | 7.086004  | -0.564637 | -6.233286  |
| H | -5.16433   | 0.109384  | -11.077267 | H | 7.243073  | -0.444967 | -7.301894  |
| H | -8.134412  | -1.760543 | -8.604436  | C | 8.87361   | -1.499416 | -1.771251  |
| H | -7.354676  | -1.016352 | -10.833356 | H | 9.661219  | -1.909394 | -1.144611  |
| C | 4.324229   | 0.686748  | 7.812732   | C | 7.694814  | -1.123919 | -1.222134  |
| C | 5.62631    | 0.32386   | 10.279256  | H | 7.536766  | -1.284473 | -0.16502   |

## Intermediate 8a

|   |           |           |           |   |           |           |           |
|---|-----------|-----------|-----------|---|-----------|-----------|-----------|
| C | -2.38325  | -2.431106 | 1.607453  | C | 4.614078  | -2.93169  | 0.506323  |
| C | 2.38325   | 2.431106  | 1.607453  | C | 5.117634  | -5.257809 | -0.11902  |
| C | 2.38325   | -2.431106 | 1.607453  | C | 4.961319  | 1.492461  | 0.627941  |
| C | 1.114211  | -2.874527 | 1.952642  | C | 4.961319  | -1.492461 | 0.627941  |
| C | 0.697425  | -4.164062 | 1.601143  | C | 6.122321  | -0.702895 | 0.356971  |
| C | -0.697425 | -4.164062 | 1.601143  | H | 7.082878  | -1.169389 | 0.1772    |
| C | -1.114211 | -2.874527 | 1.952642  | C | 6.122321  | 0.702895  | 0.356971  |
| N | 0         | -2.132047 | 2.241353  | H | 7.082878  | 1.169389  | 0.1772    |
| C | 1.114211  | 2.874527  | 1.952642  | C | -4.961319 | -1.492461 | 0.627941  |
| C | 0.697425  | 4.164062  | 1.601142  | C | -4.961319 | 1.492461  | 0.627941  |
| C | -0.697425 | 4.164062  | 1.601142  | C | -6.122321 | 0.702895  | 0.356971  |
| C | -1.114211 | 2.874527  | 1.952642  | H | -7.082878 | 1.169389  | 0.1772    |
| N | 0         | 2.132047  | 2.241352  | C | -6.122321 | -0.702895 | 0.356971  |
| C | -2.686607 | 1.07207   | 1.617296  | H | -7.082878 | -1.169389 | 0.1772    |
| C | -3.946887 | 0.691244  | 1.105922  | C | 1.483082  | 5.098229  | 0.941922  |
| C | -3.946886 | -0.691243 | 1.105922  | C | -1.483082 | 5.098229  | 0.941922  |
| C | -2.686607 | -1.07207  | 1.617296  | C | -0.704889 | 6.090224  | 0.292733  |
| N | -1.924283 | 0         | 1.963915  | H | -1.187654 | 6.830592  | -0.336508 |
| C | 2.686607  | 1.07207   | 1.617296  | C | 0.704889  | 6.090224  | 0.292733  |
| C | 3.946887  | 0.691243  | 1.105922  | H | 1.187654  | 6.830592  | -0.336508 |
| C | 3.946887  | -0.691243 | 1.105922  | C | 1.483082  | -5.098229 | 0.941922  |
| C | 2.686607  | -1.07207  | 1.617296  | C | 0.704889  | -6.090224 | 0.292733  |
| N | 1.924283  | 0         | 1.963915  | H | 1.187654  | -6.830593 | -0.336508 |
| C | -2.38325  | 2.431106  | 1.607453  | C | -1.483082 | -5.098229 | 0.941922  |
| H | 0         | 1.118147  | 2.320111  | C | -0.704889 | -6.090224 | 0.292733  |
| H | 0         | -1.118147 | 2.320111  | H | -1.187654 | -6.830593 | -0.336508 |
| C | 3.323843  | 3.378042  | 0.993245  | C | -6.041505 | -6.225134 | -0.634027 |
| C | 5.117634  | 5.25781   | -0.11902  | C | -7.866415 | -8.120754 | -1.624333 |
| C | 2.909861  | 4.742422  | 0.79587   | C | -7.232714 | -5.807932 | -1.28169  |
| C | 4.614078  | 2.93169   | 0.506323  | C | -5.772302 | -7.613912 | -0.513536 |
| C | 5.434647  | 3.869489  | -0.166207 | C | -6.698798 | -8.542049 | -1.002076 |
| C | 3.874392  | 5.695469  | 0.402175  | C | -8.127434 | -6.76369  | -1.771535 |
| C | -5.434647 | 3.869489  | -0.166207 | H | -6.490388 | -9.603081 | -0.892814 |
| C | -2.909861 | 4.742422  | 0.79587   | H | -9.031936 | -6.432488 | -2.274761 |
| C | -5.117634 | 5.25781   | -0.11902  | H | -8.57289  | -8.852643 | -2.003687 |
| C | -4.614078 | 2.93169   | 0.506323  | C | 6.041505  | -6.225134 | -0.634027 |
| C | -3.323843 | 3.378042  | 0.993245  | C | 7.866415  | -8.120754 | -1.624333 |
| C | -3.874392 | 5.695469  | 0.402175  | C | 5.772302  | -7.613912 | -0.513536 |
| C | -5.434647 | -3.869489 | -0.166207 | C | 7.232714  | -5.807932 | -1.28169  |
| C | -2.909861 | -4.742422 | 0.79587   | C | 8.127434  | -6.763691 | -1.771535 |
| C | -5.117634 | -5.257809 | -0.119019 | C | 6.698798  | -8.542049 | -1.002076 |
| C | -4.614078 | -2.93169  | 0.506323  | H | 9.031936  | -6.432488 | -2.27476  |
| C | -3.323843 | -3.378042 | 0.993245  | H | 6.490388  | -9.603081 | -0.892814 |
| C | -3.874392 | -5.695469 | 0.402175  | H | 8.57289   | -8.852643 | -2.003687 |
| C | 2.909861  | -4.742422 | 0.79587   | C | -6.041505 | 6.225134  | -0.634027 |
| C | 5.434647  | -3.869489 | -0.166207 | C | -7.866415 | 8.120754  | -1.624333 |
| C | 3.874392  | -5.695469 | 0.402175  | C | -7.232714 | 5.807932  | -1.28169  |
| C | 3.323843  | -3.378042 | 0.993245  | C | -5.772303 | 7.613912  | -0.513536 |

|   |           |           |           |   |           |           |           |
|---|-----------|-----------|-----------|---|-----------|-----------|-----------|
| C | -6.698799 | 8.542049  | -1.002076 | H | -2.754521 | -7.44124  | 1.062768  |
| C | -8.127434 | 6.76369   | -1.771534 | C | -4.555456 | -8.021319 | 0.12675   |
| H | -6.490388 | 9.603081  | -0.892814 | H | -4.377784 | -9.082432 | 0.280035  |
| H | -9.031936 | 6.432488  | -2.27476  | C | -6.588069 | -3.488976 | -0.943406 |
| H | -8.57289  | 8.852643  | -2.003686 | H | -6.742878 | -2.445567 | -1.173285 |
| C | 6.041505  | 6.225134  | -0.634027 | C | -7.441493 | -4.400747 | -1.463343 |
| C | 7.866415  | 8.120754  | -1.624333 | H | -8.291139 | -4.074493 | -2.057334 |
| C | 5.772302  | 7.613912  | -0.513536 | C | -3.647702 | 7.109507  | 0.546483  |
| C | 7.232714  | 5.807932  | -1.28169  | H | -2.754521 | 7.44124   | 1.062767  |
| C | 8.127434  | 6.763691  | -1.771534 | C | -4.555456 | 8.021319  | 0.12675   |
| C | 6.698799  | 8.542049  | -1.002076 | H | -4.377784 | 9.082432  | 0.280035  |
| H | 9.031936  | 6.432488  | -2.27476  | C | -7.441493 | 4.400747  | -1.463343 |
| H | 6.490388  | 9.603081  | -0.892814 | H | -8.291139 | 4.074493  | -2.057334 |
| H | 8.57289   | 8.852643  | -2.003686 | C | -6.588069 | 3.488976  | -0.943406 |
| C | 4.555456  | -8.021319 | 0.12675   | H | -6.742878 | 2.445567  | -1.173285 |
| H | 4.377784  | -9.082432 | 0.280035  | C | 6.588069  | 3.488976  | -0.943406 |
| C | 3.647702  | -7.109507 | 0.546484  | H | 6.742878  | 2.445567  | -1.173285 |
| H | 2.754521  | -7.44124  | 1.062768  | C | 7.441493  | 4.400747  | -1.463343 |
| C | 6.588069  | -3.488976 | -0.943406 | H | 8.291139  | 4.074494  | -2.057334 |
| H | 6.742878  | -2.445567 | -1.173285 | C | 4.555456  | 8.021319  | 0.12675   |
| C | 7.441493  | -4.400747 | -1.463343 | H | 4.377784  | 9.082432  | 0.280035  |
| H | 8.291139  | -4.074493 | -2.057334 | C | 3.647702  | 7.109507  | 0.546483  |
| C | -3.647702 | -7.109507 | 0.546484  | H | 2.754521  | 7.44124   | 1.062767  |

### Intermediate 9a

|   |           |           |          |   |           |           |           |
|---|-----------|-----------|----------|---|-----------|-----------|-----------|
| C | -2.381206 | -2.538232 | 2.015217 | C | 2.604858  | -0.758199 | 1.77782   |
| C | 2.022345  | 2.705102  | 1.961788 | N | 1.790426  | 0.231149  | 2.23476   |
| C | 2.396686  | -2.133128 | 1.700392 | C | -2.711777 | 2.276376  | 2.364749  |
| C | 1.183099  | -2.692057 | 2.082114 | H | -0.119615 | 1.172831  | 2.882361  |
| C | 0.843392  | -3.977751 | 1.647008 | H | -0.046897 | -1.074869 | 2.682609  |
| C | -0.544389 | -4.089989 | 1.710118 | C | 2.798639  | 3.742283  | 1.26412   |
| C | -1.042326 | -2.872749 | 2.201027 | C | 4.258316  | 5.779244  | -0.053496 |
| N | 0.028353  | -2.068962 | 2.490413 | C | 2.230573  | 5.054606  | 1.105781  |
| C | 0.786542  | 3.036604  | 2.499654 | C | 4.066519  | 3.425089  | 0.636526  |
| C | 0.242958  | 4.30809   | 2.26345  | C | 4.71294   | 4.430461  | -0.120972 |
| C | -1.128642 | 4.169207  | 2.438909 | C | 3.038543  | 6.09415   | 0.59377   |
| C | -1.44841  | 2.818851  | 2.707952 | C | -5.418112 | 3.583214  | -0.073942 |
| N | -0.238493 | 2.181616  | 2.860501 | C | -3.242229 | 4.451522  | 1.384813  |
| C | -2.984829 | 0.904931  | 2.35148  | C | -4.773794 | 4.814601  | -0.405394 |
| C | -4.18629  | 0.480826  | 1.695116 | C | -4.794778 | 2.670955  | 0.847817  |
| C | -4.114908 | -0.904246 | 1.675917 | C | -3.658267 | 3.133377  | 1.615778  |
| C | -2.856992 | -1.241973 | 2.247113 | C | -3.676135 | 5.211874  | 0.323982  |
| N | -2.182483 | -0.142206 | 2.682958 | C | -5.469268 | -4.176506 | 0.52858   |
| C | 2.427925  | 1.375639  | 1.869947 | C | -2.738913 | -4.833915 | 1.008     |
| C | 3.662764  | 1.123967  | 1.235458 | C | -5.012814 | -5.514499 | 0.375311  |
| C | 3.78337   | -0.25176  | 1.185889 | C | -4.572526 | -3.165318 | 0.938493  |



|   |           |           |           |   |           |           |           |
|---|-----------|-----------|-----------|---|-----------|-----------|-----------|
| C | -3.239229 | -3.524647 | 1.337774  | C | -5.104826 | 5.618114  | -1.525893 |
| C | -3.649611 | -5.839516 | 0.608748  | C | -5.752365 | 7.152558  | -3.739138 |
| C | 3.051364  | -4.341978 | 0.71706   | C | -6.258678 | 5.300175  | -2.269817 |
| C | 5.438468  | -3.233371 | -0.330297 | C | -4.237295 | 6.692825  | -1.893075 |
| C | 4.06059   | -5.200126 | 0.228773  | C | -4.593667 | 7.443115  | -3.017809 |
| C | 3.369227  | -2.964599 | 0.972257  | C | -6.578876 | 6.094394  | -3.377802 |
| C | 4.588413  | -2.395686 | 0.431524  | H | -3.953616 | 8.261351  | -3.337817 |
| C | 5.236466  | -4.644001 | -0.330459 | H | -7.469937 | 5.874992  | -3.960163 |
| C | 4.558646  | 2.026113  | 0.702403  | H | -6.00493  | 7.757404  | -4.604613 |
| C | 4.822767  | -0.939335 | 0.59546   | C | 5.014519  | 6.826883  | -0.673689 |
| C | 5.885674  | -0.041483 | 0.270294  | C | 6.512392  | 8.880881  | -1.87246  |
| H | 6.866996  | -0.412498 | 0.003355  | C | 4.610969  | 8.18148   | -0.541295 |
| C | 5.760637  | 1.357946  | 0.319296  | C | 6.170188  | 6.52254   | -1.43866  |
| H | 6.65706   | 1.917535  | 0.081794  | C | 6.901311  | 7.555911  | -2.030878 |
| C | -4.931035 | -1.734038 | 0.931902  | C | 5.37708   | 9.191062  | -1.135916 |
| C | -5.060996 | 1.218829  | 0.901198  | H | 7.779432  | 7.310858  | -2.622486 |
| C | -5.893326 | 0.389695  | 0.099482  | H | 5.068167  | 10.226363 | -1.018112 |
| H | -6.551418 | 0.82345   | -0.640699 | H | 7.092958  | 9.674492  | -2.332706 |
| C | -5.84084  | -1.008309 | 0.118838  | C | 4.900517  | -7.451161 | -0.187211 |
| H | -6.46162  | -1.525932 | -0.60397  | H | 4.811873  | -8.528537 | -0.076727 |
| C | 0.805796  | 5.277634  | 1.42204   | C | 3.946794  | -6.632174 | 0.314327  |
| C | -1.975427 | 4.975915  | 1.741263  | H | 3.10545   | -7.054544 | 0.851494  |
| C | -1.509296 | 5.959649  | 0.843463  | C | 6.511024  | -2.729758 | -1.152228 |
| C | -0.114235 | 6.11791   | 0.713018  | H | 6.56661   | -1.669798 | -1.347899 |
| H | 0.273019  | 6.759481  | -0.07302  | C | 7.405474  | -3.547588 | -1.752708 |
| C | 1.665794  | -4.807081 | 0.89791   | H | 8.191154  | -3.129725 | -2.376601 |
| C | 0.941647  | -5.808972 | 0.20935   | C | -3.262707 | -7.225109 | 0.52278   |
| H | 1.453124  | -6.460281 | -0.49181  | H | -2.271129 | -7.511252 | 0.847967  |
| C | -1.279646 | -5.053522 | 1.031751  | C | -4.127184 | -8.187574 | 0.127467  |
| C | -0.459985 | -5.923354 | 0.270369  | H | -3.80935  | -9.226247 | 0.093245  |
| H | -0.91011  | -6.647741 | -0.398533 | C | -6.877261 | -3.921371 | 0.353391  |
| C | -5.927245 | -6.536368 | -0.042935 | H | -7.268056 | -2.946756 | 0.61305   |
| C | -7.710663 | -8.531892 | -0.907468 | C | -7.736288 | -4.886004 | -0.046789 |
| C | -7.289126 | -6.225821 | -0.294692 | H | -8.795256 | -4.664837 | -0.150442 |
| C | -5.485912 | -7.875313 | -0.206881 | C | -2.697158 | 6.209699  | -0.060647 |
| C | -6.386135 | -8.853747 | -0.641571 | C | -2.993713 | 6.94118   | -1.168312 |
| C | -8.160561 | -7.229784 | -0.728452 | H | -2.315011 | 7.690641  | -1.568556 |
| H | -6.036266 | -9.87523  | -0.765317 | C | -7.039613 | 4.172671  | -1.822317 |
| H | -9.200615 | -6.979753 | -0.920379 | H | -7.980934 | 3.971703  | -2.327335 |
| H | -8.397821 | -9.300955 | -1.246625 | C | -6.645666 | 3.359279  | -0.802494 |
| C | 6.203917  | -5.512266 | -0.93303  | H | -7.30868  | 2.559707  | -0.497709 |
| C | 8.119568  | -7.21235  | -2.088719 | C | 5.814475  | 4.156495  | -1.010877 |
| C | 6.050179  | -6.921721 | -0.861282 | H | 6.054973  | 3.130191  | -1.243779 |
| C | 7.322422  | -4.973396 | -1.61918  | C | 6.508016  | 5.141081  | -1.626246 |
| C | 8.263995  | -5.833585 | -2.190778 | H | 7.322182  | 4.892794  | -2.301973 |
| C | 7.021773  | -7.751959 | -1.43212  | C | 3.428636  | 8.472194  | 0.216529  |
| H | 9.11268   | -5.410923 | -2.72198  | H | 3.152012  | 9.5116    | 0.371654  |
| H | 6.903647  | -8.829852 | -1.36006  | C | 2.674004  | 7.47894   | 0.741577  |
| H | 8.862421  | -7.86895  | -2.531091 | H | 1.802656  | 7.724836  | 1.337842  |

## Intermediate 10g

|   |           |           |           |   |           |           |           |
|---|-----------|-----------|-----------|---|-----------|-----------|-----------|
| C | -2.42387  | -1.852605 | -2.358476 | C | 4.602504  | -0.610922 | -2.670366 |
| C | 2.38898   | -2.76775  | 2.38366   | C | 5.19883   | 0.234886  | -4.896648 |
| C | 2.42387   | -1.852605 | -2.358475 | C | 4.693664  | -1.030826 | 1.712405  |
| C | 1.120999  | -2.049254 | -2.826024 | C | 4.840125  | -0.753044 | -1.223805 |
| C | 0.696533  | -1.403472 | -3.993845 | C | 5.628496  | 0.021203  | -0.335609 |
| C | -0.696533 | -1.403472 | -3.993845 | H | 6.249741  | 0.824957  | -0.715175 |
| C | -1.120999 | -2.049254 | -2.826024 | C | 5.54849   | -0.104029 | 1.056673  |
| N | 0         | -2.489809 | -2.167485 | H | 6.115373  | 0.620651  | 1.624012  |
| C | 1.137332  | -3.297583 | 2.756159  | C | -4.840125 | -0.753044 | -1.223805 |
| C | 0.694064  | -3.241824 | 4.099054  | C | -4.693664 | -1.030826 | 1.712405  |
| C | -0.694063 | -3.241823 | 4.099054  | C | -5.54849  | -0.104029 | 1.056673  |
| C | -1.137332 | -3.297583 | 2.756159  | H | -6.115373 | 0.620651  | 1.624012  |
| N | 0         | -3.475931 | 1.981426  | C | -5.628495 | 0.021203  | -0.335609 |
| C | -2.771869 | -2.569281 | 1.049167  | H | -6.24974  | 0.824957  | -0.715175 |
| C | -3.952088 | -1.794438 | 0.814158  | C | 1.346952  | -2.504759 | 5.055783  |
| C | -4.001506 | -1.629105 | -0.561862 | C | -1.346952 | -2.504759 | 5.055783  |
| C | -2.818261 | -2.228082 | -1.073956 | C | -0.704984 | -1.710002 | 6.069892  |
| N | -2.086772 | -2.83087  | -0.087894 | C | 0.704984  | -1.710002 | 6.069892  |
| C | 2.771869  | -2.569281 | 1.049167  | C | 1.475652  | -0.580271 | -4.80029  |
| C | 3.952088  | -1.794438 | 0.814158  | C | 0.704318  | 0.274858  | -5.615299 |
| C | 4.001506  | -1.629105 | -0.561862 | H | 1.186507  | 1.053259  | -6.195839 |
| C | 2.818261  | -2.228082 | -1.073956 | C | -1.475652 | -0.580271 | -4.80029  |
| N | 2.086772  | -2.83087  | -0.087894 | C | -0.704318 | 0.274858  | -5.615299 |
| C | -2.38898  | -2.76775  | 2.38366   | H | -1.186507 | 1.053259  | -6.195839 |
| H | 0         | -3.389451 | 0.97061   | C | -6.169825 | 0.793623  | -5.791004 |
| H | 0         | -2.854911 | -1.22163  | C | -8.065388 | 1.921557  | -7.534803 |
| C | 3.170824  | -2.035736 | 3.400856  | C | -7.492507 | 1.052828  | -5.346504 |
| C | 3.926457  | -0.092134 | 5.350265  | C | -5.824447 | 1.091541  | -7.135255 |
| C | 2.602107  | -1.964674 | 4.682145  | C | -6.779391 | 1.655045  | -7.987509 |
| C | 4.277853  | -1.137558 | 3.128821  | C | -8.421091 | 1.61747   | -6.227018 |
| C | 4.722334  | -0.258948 | 4.173531  | H | -6.504139 | 1.879379  | -9.01461  |
| C | 2.864371  | -0.938243 | 5.563388  | H | -9.430869 | 1.812574  | -5.875815 |
| C | -4.722334 | -0.258948 | 4.17353   | H | -8.796384 | 2.359986  | -8.207234 |
| C | -2.602107 | -1.964674 | 4.682145  | C | 6.169824  | 0.793623  | -5.791004 |
| C | -3.926457 | -0.092134 | 5.350265  | C | 8.065388  | 1.921557  | -7.534803 |
| C | -4.277853 | -1.137558 | 3.128821  | C | 5.824447  | 1.091541  | -7.135255 |
| C | -3.170824 | -2.035736 | 3.400856  | C | 7.492507  | 1.052828  | -5.346504 |
| C | -2.864371 | -0.938243 | 5.563388  | C | 8.42109   | 1.61747   | -6.227018 |
| C | -5.555665 | -0.051084 | -3.551224 | C | 6.779391  | 1.655045  | -7.987509 |
| C | -2.911282 | -0.546894 | -4.472996 | H | 9.430869  | 1.812574  | -5.875815 |
| C | -5.19883  | 0.234886  | -4.896648 | H | 6.504138  | 1.879379  | -9.014609 |
| C | -4.602504 | -0.610922 | -2.670366 | H | 8.796384  | 2.359986  | -8.207234 |
| C | -3.322729 | -1.018505 | -3.179323 | C | -4.081071 | 0.965208  | 6.283792  |
| C | -3.874535 | -0.003418 | -5.352189 | C | -4.391787 | 3.049448  | 8.084649  |
| C | 2.911282  | -0.546894 | -4.472996 | C | -5.195967 | 1.819227  | 6.16363   |
| C | 5.555665  | -0.051084 | -3.551224 | C | -3.089269 | 1.154936  | 7.293605  |
| C | 3.874535  | -0.003418 | -5.352189 | C | -3.276216 | 2.219284  | 8.182206  |
| C | 3.322729  | -1.018505 | -3.179323 | C | -5.344569 | 2.858961  | 7.088819  |

|   |           |           |           |   |           |           |           |
|---|-----------|-----------|-----------|---|-----------|-----------|-----------|
| H | -2.536554 | 2.402077  | 8.957586  | H | -2.629803 | -0.084202 | -7.139862 |
| H | -6.203128 | 3.522061  | 7.022601  | C | -4.505107 | 0.756873  | -7.587254 |
| H | -4.513372 | 3.863024  | 8.793068  | H | -4.264249 | 0.900009  | -8.637283 |
| C | 4.081072  | 0.965208  | 6.283792  | C | -6.928626 | 0.150684  | -3.161629 |
| C | 4.391787  | 3.049448  | 8.084649  | H | -7.250948 | -0.192693 | -2.187419 |
| C | 3.089269  | 1.154936  | 7.293605  | C | -7.842908 | 0.681125  | -4.006474 |
| C | 5.195967  | 1.819227  | 6.163631  | H | -8.875232 | 0.799649  | -3.688123 |
| C | 5.344569  | 2.858961  | 7.088819  | C | -1.772408 | -0.734128 | 6.489487  |
| C | 3.276216  | 2.219284  | 8.182206  | C | -1.901077 | 0.31233   | 7.349204  |
| H | 6.203128  | 3.522061  | 7.022601  | H | -1.134469 | 0.568434  | 8.07533   |
| H | 2.536554  | 2.402077  | 8.957586  | C | -6.121879 | 1.541277  | 5.09149   |
| H | 4.513372  | 3.863024  | 8.793067  | H | -7.034393 | 2.129802  | 5.041776  |
| C | 4.505107  | 0.756873  | -7.587254 | C | -5.900866 | 0.579059  | 4.15318   |
| H | 4.264249  | 0.900009  | -8.637283 | H | -6.668609 | 0.402163  | 3.411157  |
| C | 3.5863    | 0.231935  | -6.744393 | C | 5.900866  | 0.579059  | 4.15318   |
| H | 2.629803  | -0.084202 | -7.139861 | H | 6.668609  | 0.402163  | 3.411158  |
| C | 6.928626  | 0.150684  | -3.161629 | C | 6.121879  | 1.541277  | 5.09149   |
| H | 7.250948  | -0.192693 | -2.187419 | H | 7.034393  | 2.129802  | 5.041776  |
| C | 7.842908  | 0.681125  | -4.006474 | C | 1.901077  | 0.31233   | 7.349204  |
| H | 8.875232  | 0.799649  | -3.688123 | H | 1.134469  | 0.568434  | 8.07533   |
| C | -3.5863   | 0.231934  | -6.744393 | C | 1.772408  | -0.734128 | 6.489487  |

### Intermediate 11c

|   |           |           |           |   |           |           |           |
|---|-----------|-----------|-----------|---|-----------|-----------|-----------|
| C | -2.721194 | -2.275985 | -2.611873 | C | -2.649269 | -3.174326 | 2.134068  |
| C | 2.125633  | -3.096827 | 2.036903  | H | -0.28872  | -3.739781 | 0.655088  |
| C | 2.099477  | -2.151698 | -2.707177 | H | -0.215209 | -3.25416  | -1.534769 |
| C | 0.83066   | -2.477178 | -3.193497 | C | 2.908141  | -2.372304 | 3.05972   |
| C | 0.378419  | -1.909591 | -4.39254  | C | 3.666885  | -0.481167 | 5.060544  |
| C | -1.006036 | -2.026383 | -4.371395 | C | 2.372216  | -2.362081 | 4.356387  |
| C | -1.430045 | -2.576659 | -3.144295 | C | 3.98045   | -1.430096 | 2.792383  |
| N | -0.271156 | -2.942908 | -2.49809  | C | 4.431575  | -0.581046 | 3.85563   |
| C | 0.895722  | -3.666415 | 2.418363  | C | 2.633772  | -1.362032 | 5.269391  |
| C | 0.479343  | -3.658294 | 3.770828  | C | -4.934487 | -0.712919 | 4.044583  |
| C | -0.909051 | -3.681623 | 3.800449  | C | -2.815974 | -2.443501 | 4.464876  |
| C | -1.38043  | -3.701071 | 2.464199  | C | -4.135068 | -0.600681 | 5.222809  |
| N | -0.259931 | -3.844391 | 1.663062  | C | -4.489516 | -1.540492 | 2.958264  |
| C | -3.060317 | -2.946535 | 0.811425  | C | -3.399464 | -2.466145 | 3.187457  |
| C | -4.19402  | -2.09115  | 0.605528  | C | -3.067941 | -1.452027 | 5.387435  |
| C | -4.22643  | -1.849702 | -0.764421 | C | -5.177241 | 0.588982  | -3.492758 |
| C | -3.102431 | -2.560481 | -1.303445 | C | -3.044775 | -0.810449 | -4.548963 |
| N | -2.411112 | -3.234855 | -0.336797 | C | -4.452421 | 1.114732  | -4.601737 |
| C | 2.490993  | -2.863248 | 0.700289  | C | -4.648604 | -0.535049 | -2.76197  |
| C | 3.63178   | -2.031855 | 0.46736   | C | -3.550944 | -1.282337 | -3.330698 |
| C | 3.655552  | -1.83424  | -0.905073 | C | -3.373874 | 0.409647  | -5.088106 |
| C | 2.508721  | -2.490845 | -1.418144 | C | 2.467333  | -0.760737 | -4.796594 |
| N | 1.811648  | -3.140213 | -0.434767 | C | 5.074849  | -0.087219 | -3.873028 |

|   |           |           |           |   |           |           |           |
|---|-----------|-----------|-----------|---|-----------|-----------|-----------|
| C | 3.373672  | -0.099997 | -5.656768 | C | -5.408148 | 1.265289  | 6.127158  |
| C | 2.927234  | -1.238582 | -3.518657 | C | -3.288631 | 0.563011  | 7.211433  |
| C | 4.176276  | -0.745438 | -3.003465 | C | -3.474412 | 1.585194  | 8.148161  |
| C | 4.679321  | 0.225709  | -5.201862 | C | -5.555527 | 2.261085  | 7.09981   |
| C | 4.355402  | -1.258113 | 1.371285  | H | -2.729546 | 1.738934  | 8.924875  |
| C | 4.438468  | -0.902017 | -1.560926 | H | -6.418041 | 2.921718  | 7.070184  |
| C | 5.192954  | -0.104309 | -0.664613 | H | -4.71697  | 3.191803  | 8.8414    |
| H | 5.759769  | 0.744302  | -1.031005 | C | 3.821451  | 0.545379  | 6.027617  |
| C | 5.144787  | -0.269031 | 0.726192  | C | 4.130024  | 2.570652  | 7.893859  |
| H | 5.678816  | 0.472796  | 1.303794  | C | 2.854564  | 0.672067  | 7.070779  |
| C | -4.96157  | -0.824351 | -1.355215 | C | 4.909966  | 1.432834  | 5.906843  |
| C | -4.880898 | -1.334482 | 1.551349  | C | 5.058399  | 2.441683  | 6.8649    |
| C | -5.658146 | -0.30126  | 0.964014  | C | 3.0396    | 1.708466  | 7.992787  |
| H | -6.175153 | 0.418523  | 1.583476  | H | 5.89692   | 3.129986  | 6.798906  |
| C | -5.696928 | -0.061739 | -0.408729 | H | 2.318015  | 1.844265  | 8.794395  |
| H | -6.241489 | 0.819586  | -0.720348 | H | 4.251408  | 3.361523  | 8.627646  |
| C | 1.141666  | -2.947394 | 4.741039  | C | 3.912686  | 0.808471  | -7.860489 |
| C | -1.551354 | -2.988712 | 4.796295  | H | 3.647762  | 0.979379  | -8.900514 |
| C | -0.899317 | -2.227472 | 5.831594  | C | 3.050728  | 0.172049  | -7.035058 |
| C | 0.508384  | -2.203358 | 5.799391  | H | 2.115375  | -0.198845 | -7.434892 |
| C | 1.040689  | -0.920564 | -5.139548 | C | 6.435144  | 0.197984  | -3.491195 |
| C | 0.214984  | 0.00248   | -5.850084 | H | 6.798001  | -0.167813 | -2.539744 |
| H | 0.673309  | 0.888652  | -6.277473 | C | 7.294156  | 0.834546  | -4.319719 |
| C | -1.76339  | -1.128464 | -5.064944 | H | 8.319807  | 1.014632  | -4.008881 |
| C | -1.193688 | -0.078395 | -5.806702 | C | -2.313319 | 0.92896   | -5.928379 |
| C | -4.675487 | 2.392374  | -5.17402  | C | -2.504965 | 2.177649  | -6.430489 |
| C | -5.116303 | 4.901677  | -6.258753 | H | -1.759228 | 2.679155  | -7.042773 |
| C | -5.806541 | 3.127667  | -4.766868 | C | -6.373277 | 1.333292  | -3.175758 |
| C | -3.725385 | 2.913     | -6.106011 | H | -7.089901 | 0.918533  | -2.477055 |
| C | -3.977684 | 4.18371   | -6.629353 | C | -6.670496 | 2.515308  | -3.787452 |
| C | -6.022391 | 4.389155  | -5.337864 | H | -7.593914 | 3.027869  | -3.530273 |
| H | -3.272513 | 4.621217  | -7.331439 | C | -1.966889 | -1.279027 | 6.308431  |
| H | -6.895119 | 4.96984   | -5.05065  | C | -2.094315 | -0.273419 | 7.216543  |
| H | -5.288007 | 5.883483  | -6.68909  | H | -1.322348 | -0.045886 | 7.946453  |
| C | 5.591804  | 0.898441  | -6.079094 | C | -6.339148 | 1.033803  | 5.048713  |
| C | 7.368239  | 2.254481  | -7.786104 | H | -7.254983 | 1.619014  | 5.03171   |
| C | 5.206404  | 1.228004  | -7.405072 | C | -6.116732 | 0.11817   | 4.064679  |
| C | 6.896036  | 1.241515  | -5.636131 | H | -6.884062 | -0.029451 | 3.314809  |
| C | 7.764765  | 1.919162  | -6.497781 | C | 5.587462  | 0.287963  | 3.831766  |
| C | 6.102156  | 1.905816  | -8.238643 | H | 6.335693  | 0.158217  | 3.060314  |
| H | 8.76064   | 2.17775   | -6.147792 | C | 5.81167   | 1.21991   | 4.79902   |
| H | 5.79637   | 2.153866  | -9.251606 | H | 6.707084  | 1.833865  | 4.746404  |
| H | 8.052617  | 2.781654  | -8.443714 | C | 1.69029   | -0.2027   | 7.126474  |
| C | -4.288034 | 0.412852  | 6.202556  | H | 0.938002  | 0.005457  | 7.882232  |
| C | -4.596204 | 2.411628  | 8.096168  | C | 1.563975  | -1.219298 | 6.23064   |

## Intermediate 12c

|   |           |           |           |   |           |           |           |
|---|-----------|-----------|-----------|---|-----------|-----------|-----------|
| C | -2.353478 | -2.423829 | -3.044117 | C | 4.240786  | -0.55897  | -3.052044 |
| C | 2.3768    | -3.477762 | 1.729907  | C | 3.93998   | 1.159159  | -4.808892 |
| C | 2.430951  | -2.418576 | -2.988346 | C | 4.546826  | -1.544553 | 1.22363   |
| C | 1.184809  | -2.797728 | -3.547392 | C | 4.576656  | -0.894717 | -1.657219 |
| C | 0.754339  | -2.27555  | -4.788919 | C | 5.283775  | -0.144142 | -0.682278 |
| C | -0.635492 | -2.277276 | -4.805047 | H | 5.783983  | 0.775833  | -0.953091 |
| C | -1.093679 | -2.800394 | -3.573792 | C | 5.269953  | -0.451538 | 0.679254  |
| N | 0.038405  | -3.229373 | -2.898156 | H | 5.760374  | 0.260711  | 1.329029  |
| C | 1.119431  | -4.050173 | 2.047529  | C | -4.533656 | -0.903799 | -1.764827 |
| C | 0.659326  | -4.101522 | 3.383873  | C | -4.569689 | -1.551529 | 1.116652  |
| C | -0.730241 | -4.102792 | 3.367692  | C | -5.282169 | -0.460444 | 0.554694  |
| C | -1.159237 | -4.052156 | 2.021138  | H | -5.789629 | 0.251048  | 1.192112  |
| N | -0.01077  | -4.158684 | 1.251806  | C | -5.264884 | -0.154069 | -0.807066 |
| C | -2.785552 | -3.194093 | 0.357962  | H | -5.760638 | 0.764641  | -1.090046 |
| C | -3.877922 | -2.289306 | 0.158881  | C | 1.299167  | -3.450779 | 4.413144  |
| C | -3.861149 | -1.984377 | -1.198539 | C | -1.394929 | -3.453345 | 4.381861  |
| C | -2.759816 | -2.723181 | -1.739711 | C | -0.767006 | -2.760147 | 5.472175  |
| N | -2.117861 | -3.458421 | -0.794964 | C | 0.644965  | -2.758583 | 5.488586  |
| C | 2.783509  | -3.189739 | 0.422766  | C | 1.412966  | -1.251479 | -5.429336 |
| C | 3.878916  | -2.283112 | 0.249846  | C | 0.778166  | -0.166747 | -6.124436 |
| C | 3.893592  | -1.977188 | -1.107364 | C | -1.281562 | -1.255136 | -5.460981 |
| C | 2.806896  | -2.717662 | -1.674842 | C | -0.633621 | -0.16896  | -6.14161  |
| N | 2.143962  | -3.454533 | -0.745925 | C | -3.97811  | 2.457661  | -5.42741  |
| C | -2.409617 | -3.481491 | 1.674302  | C | -4.278145 | 5.023438  | -6.428122 |
| H | 0.000281  | -4.018844 | 0.247945  | C | -5.079884 | 3.232946  | -5.012881 |
| H | 0.028091  | -3.529142 | -1.930063 | C | -2.991598 | 2.963088  | -6.327891 |
| C | 3.118365  | -2.801629 | 2.813256  | C | -3.172694 | 4.26337   | -6.809893 |
| C | 3.835416  | -1.027174 | 4.933301  | C | -5.223268 | 4.522557  | -5.539137 |
| C | 2.54861   | -2.859104 | 4.095874  | H | -2.437678 | 4.687884  | -7.489084 |
| C | 4.180483  | -1.836738 | 2.620239  | H | -6.072001 | 5.134384  | -5.244812 |
| C | 4.621102  | -1.057308 | 3.742828  | H | -4.395833 | 6.027132  | -6.824867 |
| C | 2.790868  | -1.911796 | 5.065709  | C | 4.095604  | 2.470176  | -5.327003 |
| C | -4.703448 | -1.063408 | 3.63399   | C | 4.408605  | 5.039651  | -6.314851 |
| C | -2.63767  | -2.863535 | 4.035383  | C | 3.128153  | 2.974142  | -6.248676 |
| C | -3.94609  | -1.033353 | 4.842969  | C | 5.184759  | 3.248643  | -4.885921 |
| C | -4.235621 | -1.842518 | 2.521904  | C | 5.335338  | 4.539987  | -5.406028 |
| C | -3.177257 | -2.8064   | 2.739904  | C | 3.314996  | 4.276344  | -6.72316  |
| C | -2.904036 | -1.916999 | 4.99949   | H | 6.174989  | 5.154149  | -5.091261 |
| C | -4.611955 | 0.613039  | -3.8365   | H | 2.59371   | 4.699759  | -7.417604 |
| C | -2.532772 | -0.859426 | -4.922266 | H | 4.531348  | 6.044766  | -6.706418 |
| C | -3.8298   | 1.148194  | -4.903419 | C | -4.112313 | -0.066449 | 5.866947  |
| C | -4.166306 | -0.568581 | -3.15174  | C | -4.442407 | 1.84405   | 7.845286  |
| C | -3.099908 | -1.354681 | -3.736773 | C | -5.210268 | 0.814719  | 5.795591  |
| C | -2.782152 | 0.408036  | -5.399054 | C | -3.144884 | 0.010853  | 6.914495  |
| C | 2.650173  | -0.852683 | -4.861061 | C | -3.340483 | 0.990247  | 7.893648  |
| C | 4.698847  | 0.624969  | -3.724717 | C | -5.36957  | 1.764849  | 6.811508  |
| C | 2.906832  | 0.416176  | -5.330349 | H | -2.619207 | 1.089707  | 8.700874  |
| C | 3.190649  | -1.347179 | -3.662859 | H | -6.215811 | 2.44635   | 6.785639  |

|   |           |           |           |   |           |           |           |
|---|-----------|-----------|-----------|---|-----------|-----------|-----------|
| H | -4.571513 | 2.589833  | 8.623626  | H | -1.046606 | 2.652501  | -7.275604 |
| C | 3.976444  | -0.059124 | 5.959878  | C | -5.775776 | 1.405916  | -3.513507 |
| C | 4.257247  | 1.854285  | 7.942644  | H | -6.530787 | 0.997812  | -2.852658 |
| C | 2.984091  | 0.018215  | 6.983872  | C | -5.996668 | 2.626514  | -4.077392 |
| C | 5.075057  | 0.822965  | 5.913425  | H | -6.899111 | 3.174899  | -3.819759 |
| C | 5.209069  | 1.774515  | 6.931542  | C | -1.831117 | -1.814137 | 5.963233  |
| C | 3.155357  | 0.999347  | 7.965955  | C | -1.96833  | -0.851925 | 6.915633  |
| H | 6.055003  | 2.456854  | 6.924946  | H | -1.21613  | -0.676861 | 7.679904  |
| H | 2.414943  | 1.099265  | 8.755632  | C | -6.106594 | 0.661551  | 4.674614  |
| H | 4.367039  | 2.601257  | 8.722789  | H | -7.007999 | 1.268654  | 4.65566   |
| C | 1.960166  | 2.182822  | -6.619907 | C | -5.866711 | -0.207017 | 3.652731  |
| H | 1.206713  | 2.658488  | -7.241547 | H | -6.605922 | -0.29733  | 2.866036  |
| C | 1.832719  | 0.907237  | -6.164358 | C | 5.783164  | -0.200538 | 3.78825   |
| C | 5.852507  | 1.421138  | -3.374246 | H | 6.5408    | -0.291533 | 3.019347  |
| H | 6.593732  | 1.014453  | -2.697084 | C | 5.99824   | 0.669209  | 4.814531  |
| C | 6.08213   | 2.643353  | -3.931076 | H | 6.899392  | 1.276977  | 4.816352  |
| H | 6.97679   | 3.19415   | -3.6523   | C | 1.809056  | -0.846549 | 6.958214  |
| C | -1.690477 | 0.901432  | -6.208486 | H | 1.038996  | -0.671735 | 7.704553  |
| C | -1.812306 | 2.17539   | -6.67023  | C | 1.695404  | -1.810137 | 6.003927  |

### Intermediate 13e

|   |           |           |          |   |           |           |           |
|---|-----------|-----------|----------|---|-----------|-----------|-----------|
| C | -2.818866 | -3.39783  | 2.686235 | H | -0.431715 | -2.256297 | 3.74735   |
| C | 2.029571  | 1.510631  | 3.68788  | C | 2.824018  | 2.588669  | 3.057225  |
| C | 2.021144  | -3.193392 | 2.542271 | C | 3.690652  | 4.670781  | 1.300476  |
| C | 0.76967   | -3.767515 | 2.855079 | C | 2.242903  | 3.868735  | 3.027662  |
| C | 0.352146  | -4.978072 | 2.242267 | C | 3.963002  | 2.381771  | 2.192407  |
| C | -1.034639 | -5.047471 | 2.258429 | C | 4.47804   | 3.492571  | 1.433741  |
| C | -1.516296 | -3.877078 | 2.922102 | C | 2.564025  | 4.810203  | 2.078773  |
| N | -0.388043 | -3.198893 | 3.377442 | C | -4.788413 | 3.148534  | 0.567765  |
| C | 0.725213  | 1.845716  | 4.1632   | C | -2.922008 | 3.70563   | 2.540013  |
| C | 0.252021  | 3.173163  | 4.118569 | C | -4.03484  | 4.35742   | 0.527717  |
| C | -1.132425 | 3.139661  | 3.996462 | C | -4.421449 | 2.109495  | 1.490359  |
| C | -1.542758 | 1.793415  | 3.984599 | C | -3.459723 | 2.40904   | 2.532755  |
| N | -0.401078 | 1.04353   | 4.191958 | C | -3.097772 | 4.596308  | 1.507981  |
| C | -3.203473 | 0.093635  | 3.237358 | C | -4.732078 | -3.565734 | -0.501767 |
| C | -4.30807  | -0.144106 | 2.356371 | C | -2.946953 | -5.149116 | 0.868568  |
| C | -4.385509 | -1.520635 | 2.283807 | C | -3.989373 | -4.494718 | -1.235823 |
| C | -3.259407 | -2.064851 | 3.007477 | C | -4.556959 | -3.433855 | 0.873617  |
| N | -2.57439  | -1.076519 | 3.616282 | C | -3.542364 | -4.097575 | 1.597769  |
| C | 2.438244  | 0.205889  | 3.436059 | C | -3.126517 | -5.316453 | -0.515038 |
| C | 3.585028  | 0.015503  | 2.604584 | C | 2.288841  | -4.980586 | 0.888244  |
| C | 3.574217  | -1.3329   | 2.259879 | C | 4.462012  | -3.858876 | -0.394596 |
| C | 2.414046  | -1.884239 | 2.909307 | C | 2.59856   | -5.385082 | -0.392946 |
| N | 1.743151  | -0.965554 | 3.62682  | C | 2.828433  | -3.831719 | 1.480922  |
| C | -2.76794  | 1.402397  | 3.367297 | C | 3.950324  | -3.229967 | 0.788194  |
| H | -0.361937 | 0.034269  | 4.100627 | C | 3.697342  | -4.878389 | -1.039344 |

|   |           |           |           |   |           |           |           |
|---|-----------|-----------|-----------|---|-----------|-----------|-----------|
| C | 4.329476  | 0.984252  | 1.931772  | C | -3.228884 | 7.256022  | -1.641738 |
| C | 4.313767  | -1.867136 | 1.208721  | C | -5.147956 | 6.085066  | -2.556069 |
| C | 5.112501  | -0.903428 | 0.541627  | H | -2.508003 | 8.065848  | -1.72118  |
| H | 5.667758  | -1.169032 | -0.346995 | H | -5.910311 | 5.99309   | -3.325292 |
| C | 5.118388  | 0.446588  | 0.883524  | H | -4.275108 | 7.841386  | -3.422927 |
| H | 5.678484  | 1.09963   | 0.228015  | C | 3.910719  | 5.674076  | 0.322404  |
| C | -4.957493 | -2.112568 | 1.197875  | C | 4.346129  | 7.610587  | -1.608898 |
| C | -4.807072 | 0.696844  | 1.342927  | C | 2.916906  | 6.680102  | 0.123612  |
| C | -5.3036   | 0.03803   | 0.165499  | C | 5.08683   | 5.619585  | -0.452076 |
| H | -5.469511 | 0.625006  | -0.730555 | C | 5.297217  | 6.615879  | -1.415081 |
| C | -5.361746 | -1.358671 | 0.070909  | C | 3.167656  | 7.639181  | -0.861194 |
| C | 0.935992  | 4.19083   | 3.487779  | H | 6.202677  | 6.60311   | -2.016164 |
| C | -1.74704  | 4.112644  | 3.232598  | H | 2.430331  | 8.415177  | -1.050801 |
| C | -1.072208 | 5.168081  | 2.548364  | H | 4.515447  | 8.373376  | -2.362676 |
| C | 0.339196  | 5.219705  | 2.697105  | C | 1.731732  | -6.575714 | -2.264527 |
| C | 1.033623  | -5.544694 | 1.198004  | H | 1.00304   | -7.177301 | -2.801796 |
| C | 0.428861  | -6.147567 | 0.038456  | C | 1.531626  | -6.154978 | -0.984742 |
| C | -1.659814 | -5.645461 | 1.177613  | C | 5.6838    | -3.528459 | -1.094711 |
| C | -0.973296 | -6.134119 | 0.000908  | H | 6.429193  | -2.914238 | -0.604677 |
| C | -3.788593 | -4.295325 | -2.619046 | C | 5.970295  | -4.035078 | -2.326488 |
| C | -3.328605 | -3.851398 | -5.302786 | H | 6.91407   | -3.775342 | -2.79901  |
| C | -4.451232 | -3.20356  | -3.248423 | C | -1.962975 | -5.93369  | -1.115664 |
| C | -2.775432 | -5.051778 | -3.268123 | C | -1.846827 | -5.849045 | -2.476537 |
| C | -2.588082 | -4.825149 | -4.639873 | H | -0.976882 | -6.242394 | -2.993964 |
| C | -4.219521 | -3.024375 | -4.616091 | C | -5.23968  | -2.331393 | -1.081434 |
| H | -1.829434 | -5.386327 | -5.179366 | C | -5.148716 | -2.204428 | -2.436363 |
| H | -4.706934 | -2.207291 | -5.141833 | H | -5.456379 | -1.290014 | -2.938883 |
| H | -3.164168 | -3.68861  | -6.363362 | C | -2.029764 | 5.571029  | 1.456505  |
| C | 3.920606  | -5.346042 | -2.358872 | C | -2.067164 | 6.444883  | 0.414735  |
| C | 4.373561  | -6.241442 | -4.939241 | H | -1.306303 | 7.2057    | 0.263918  |
| C | 2.958512  | -6.211701 | -2.962681 | C | -5.992348 | 4.027766  | -1.380654 |
| C | 5.077765  | -4.91835  | -3.04097  | H | -6.817364 | 3.947792  | -2.083808 |
| C | 5.297095  | -5.389432 | -4.340002 | C | -5.848017 | 3.081476  | -0.410239 |
| C | 3.218669  | -6.640788 | -4.269237 | H | -6.582439 | 2.286698  | -0.343541 |
| H | 6.188056  | -5.084625 | -4.882613 | C | 5.713823  | 3.528562  | 0.688678  |
| H | 2.50661   | -7.293433 | -4.768046 | H | 6.465862  | 2.769265  | 0.868207  |
| H | 4.551437  | -6.596624 | -5.949548 | C | 6.001001  | 4.536299  | -0.184036 |
| C | -4.100325 | 5.303019  | -0.527026 | H | 6.954969  | 4.532322  | -0.704905 |
| C | -4.226251 | 7.124056  | -2.609422 | C | 1.662299  | 6.655653  | 0.869872  |
| C | -5.091088 | 5.146319  | -1.517456 | H | 0.903122  | 7.385203  | 0.601513  |
| C | -3.13831  | 6.357689  | -0.574657 | C | 1.468161  | 5.723626  | 1.840773  |

## Intermediate 14d

|   |           |           |           |   |           |           |           |
|---|-----------|-----------|-----------|---|-----------|-----------|-----------|
| C | -2.674016 | -2.991833 | -3.054795 | C | 3.982169  | -0.81627  | -2.949186 |
| C | 2.484639  | -4.062829 | 1.658943  | C | 3.585004  | 1.069694  | -4.502057 |
| C | 2.168502  | -2.691892 | -2.979042 | C | 4.738672  | -2.383884 | 0.940165  |
| C | 0.901534  | -3.020758 | -3.526796 | C | 4.452226  | -1.328743 | -1.653251 |
| C | 0.435147  | -2.395852 | -4.70592  | C | 5.121372  | -0.588092 | -0.621946 |
| C | -0.949964 | -2.481244 | -4.752991 | H | 5.364409  | 0.452899  | -0.799129 |
| C | -1.375206 | -3.181397 | -3.586951 | C | 5.248101  | -1.090814 | 0.677251  |
| N | -0.217963 | -3.583964 | -2.934718 | C | -4.84589  | -1.600657 | -1.728498 |
| C | 1.172909  | -4.374873 | 2.091393  | C | -4.531384 | -1.629707 | 1.068492  |
| C | 0.772164  | -4.151119 | 3.440742  | C | -5.151354 | -0.518862 | 0.404087  |
| C | -0.606216 | -3.983875 | 3.44398   | H | -5.342996 | 0.387221  | 0.966497  |
| C | -1.092136 | -4.08849  | 2.120399  | C | -5.290351 | -0.481081 | -0.987164 |
| N | 0.002854  | -4.44053  | 1.346967  | C | 1.506804  | -3.432981 | 4.372125  |
| C | -2.843543 | -3.452374 | 0.447739  | C | -1.175694 | -3.147144 | 4.373409  |
| C | -4.016417 | -2.645029 | 0.2415    | C | -0.45531  | -2.353331 | 5.323229  |
| C | -4.174492 | -2.629536 | -1.131575 | C | 0.950336  | -2.469203 | 5.285984  |
| C | -3.042542 | -3.307258 | -1.712121 | C | 1.05598   | -1.298745 | -5.253226 |
| N | -2.268714 | -3.846901 | -0.726143 | C | 0.386938  | -0.167667 | -5.821736 |
| C | 2.850184  | -3.860697 | 0.293062  | C | -1.637379 | -1.426347 | -5.334267 |
| C | 4.021622  | -3.071821 | 0.003376  | C | -1.023328 | -0.217211 | -5.817732 |
| C | 3.87742   | -2.554768 | -1.270341 | C | -3.983004 | 2.248235  | -3.992256 |
| C | 2.666987  | -3.161021 | -1.757066 | C | -3.697092 | 4.965236  | -3.603555 |
| N | 2.060257  | -3.94305  | -0.815913 | C | -4.668685 | 2.853381  | -2.902024 |
| C | -2.334504 | -3.511189 | 1.751743  | C | -3.022989 | 2.948707  | -4.771764 |
| H | 0.003322  | -4.437372 | 0.332543  | C | -2.92441  | 4.332855  | -4.574117 |
| H | -0.2293   | -3.967207 | -1.995514 | C | -4.527969 | 4.237367  | -2.751167 |
| C | 3.327148  | -3.402428 | 2.688885  | H | -2.209687 | 4.910234  | -5.154881 |
| C | 4.091576  | -1.011729 | 4.137102  | H | -5.038942 | 4.744639  | -1.936812 |
| C | 2.820548  | -3.083936 | 3.969172  | H | -3.602783 | 6.037687  | -3.464574 |
| C | 4.404786  | -2.577645 | 2.304753  | C | 3.727756  | 2.415885  | -4.922265 |
| C | 4.74066   | -1.391495 | 2.961925  | C | 4.026113  | 5.045072  | -5.734042 |
| C | 3.152204  | -1.903762 | 4.649796  | C | 2.73149   | 2.988115  | -5.77103  |
| C | -4.405846 | -0.713593 | 3.463049  | C | 4.842917  | 3.150422  | -4.470763 |
| C | -2.391456 | -2.52925  | 3.995267  | C | 4.983115  | 4.475893  | -4.90004  |
| C | -3.571845 | -0.545668 | 4.607867  | C | 2.912624  | 4.319782  | -6.157847 |
| C | -4.049733 | -1.674452 | 2.457334  | H | 5.840732  | 5.060529  | -4.577589 |
| C | -3.008521 | -2.64311  | 2.743348  | H | 2.173333  | 4.795701  | -6.797189 |
| C | -2.556183 | -1.444182 | 4.82491   | H | 4.143451  | 6.07485   | -6.057257 |
| C | -4.776537 | 0.086231  | -3.219194 | C | -3.648843 | 0.545872  | 5.508529  |
| C | -2.935501 | -1.191102 | -4.814862 | C | -3.814965 | 2.686516  | 7.255771  |
| C | -4.097748 | 0.850946  | -4.168304 | C | -4.71843  | 1.454798  | 5.379613  |
| C | -4.508516 | -1.276404 | -3.067071 | C | -2.632627 | 0.701697  | 6.499862  |
| C | -3.470856 | -1.946835 | -3.747341 | C | -2.746558 | 1.796222  | 7.363231  |
| C | -3.199927 | 0.174366  | -4.991233 | C | -4.792257 | 2.525693  | 6.278694  |
| C | 2.297589  | -0.934062 | -4.680298 | H | -1.989453 | 1.955487  | 8.126989  |
| C | 4.397784  | 0.435532  | -3.516356 | H | -5.613616 | 3.234071  | 6.208837  |
| C | 2.526536  | 0.375325  | -5.035003 | H | -3.880434 | 3.523251  | 7.944457  |
| C | 2.895868  | -1.547339 | -3.572669 | C | 4.050893  | 0.351157  | 4.507624  |



|   |           |          |           |   |           |           |           |
|---|-----------|----------|-----------|---|-----------|-----------|-----------|
| C | 3.912208  | 3.020966 | 5.189073  | H | -1.217104 | 2.771059  | -5.969186 |
| C | 3.120088  | 0.750035 | 5.504793  | C | -5.28618  | 0.654543  | -1.983451 |
| C | 4.7793    | 1.289604 | 3.7242    | C | -5.286841 | 2.014252  | -1.876273 |
| C | 4.713086  | 2.631614 | 4.114861  | H | -5.606145 | 2.50778   | -0.960977 |
| C | 3.096056  | 2.107901 | 5.851455  | C | -1.435269 | -1.279701 | 5.720547  |
| H | 5.258867  | 3.384039 | 3.551433  | C | -1.496403 | -0.212338 | 6.56391   |
| H | 2.405831  | 2.456971 | 6.615157  | H | -0.721547 | -0.000867 | 7.296106  |
| H | 3.875973  | 4.068591 | 5.471204  | C | -5.681204 | 1.195311  | 4.334722  |
| C | 1.549584  | 2.227413 | -6.165199 | H | -6.560731 | 1.831951  | 4.283504  |
| H | 0.794443  | 2.741431 | -6.754104 | C | -5.535949 | 0.186685  | 3.429341  |
| C | 1.424635  | 0.92483  | -5.789561 | H | -6.321927 | 0.026037  | 2.700102  |
| C | 5.572331  | 1.196113 | -3.155149 | C | 5.292106  | -0.4223   | 2.031008  |
| H | 6.341723  | 0.730091 | -2.55003  | C | 5.364262  | 0.873657  | 2.450143  |
| C | 5.779286  | 2.463595 | -3.61197  | H | 5.719177  | 1.661164  | 1.7889    |
| H | 6.690184  | 2.986305 | -3.331717 | C | 2.100142  | -0.187343 | 5.960346  |
| C | -2.076358 | 0.838919 | -5.620781 | H | 1.294739  | 0.222619  | 6.562009  |
| C | -2.048269 | 2.204504 | -5.560762 | C | 2.057338  | -1.472386 | 5.495289  |

### Intermediate 15c

|   |           |           |           |   |           |           |           |
|---|-----------|-----------|-----------|---|-----------|-----------|-----------|
| C | -2.882359 | -3.141303 | -2.661692 | C | 3.872541  | -0.794553 | 4.257625  |
| C | 2.209582  | -4.022339 | 2.031757  | C | 2.528319  | -2.823666 | 4.231983  |
| C | 2.003478  | -2.922072 | -2.68526  | C | 4.168695  | -2.531908 | 2.58251   |
| C | 0.70507   | -3.218989 | -3.207605 | C | 4.539049  | -1.311147 | 3.143946  |
| C | 0.223853  | -2.573739 | -4.362852 | C | 2.872776  | -1.589066 | 4.801114  |
| C | -1.163597 | -2.615336 | -4.366954 | C | -4.598378 | -0.820657 | 3.134274  |
| C | -1.574942 | -3.322759 | -3.208371 | C | -2.759037 | -2.505998 | 4.268821  |
| N | -0.414041 | -3.736082 | -2.578438 | C | -3.818477 | -0.323403 | 4.178396  |
| C | 0.910012  | -4.315114 | 2.488294  | C | -4.430304 | -2.118016 | 2.667912  |
| C | 0.497561  | -3.945371 | 3.807441  | C | -3.385454 | -2.967472 | 3.09434   |
| C | -0.88626  | -3.870483 | 3.830539  | C | -2.922456 | -1.206988 | 4.766858  |
| C | -1.380907 | -4.217346 | 2.534765  | C | -4.879556 | 0.000655  | -2.666249 |
| N | -0.264607 | -4.57763  | 1.786573  | C | -3.112152 | -1.26429  | -4.345639 |
| C | -3.19753  | -3.856854 | 0.791716  | C | -4.185858 | 0.778574  | -3.58545  |
| C | -4.430361 | -3.133385 | 0.534713  | C | -4.670451 | -1.378609 | -2.586546 |
| C | -4.49256  | -2.942953 | -0.826901 | C | -3.657355 | -2.047927 | -3.303488 |
| C | -3.306312 | -3.547643 | -1.379201 | C | -3.335826 | 0.108473  | -4.465326 |
| N | -2.556343 | -4.131133 | -0.365146 | C | 2.145497  | -1.18471  | -4.417982 |
| C | 2.602283  | -3.92417  | 0.640866  | C | 4.352413  | 0.098311  | -3.357787 |
| C | 3.814837  | -3.200288 | 0.320907  | C | 2.414478  | 0.111384  | -4.784712 |
| C | 3.716302  | -2.774332 | -0.991931 | C | 2.760075  | -1.81896  | -3.32889  |
| C | 2.494741  | -3.362468 | -1.460485 | C | 3.893293  | -1.126002 | -2.754897 |
| N | 1.839329  | -4.063199 | -0.461339 | C | 3.526142  | 0.762363  | -4.305871 |
| C | -2.6814   | -3.852116 | 2.138966  | C | 4.54314   | -2.46984  | 1.215045  |
| H | -0.289195 | -4.693315 | 0.779658  | C | 4.351705  | -1.602593 | -1.44815  |
| H | -0.399498 | -4.140997 | -1.648268 | C | 5.043611  | -0.821348 | -0.465892 |
| C | 3.050356  | -3.282476 | 3.00457   | H | 5.333859  | 0.192436  | -0.714907 |

|   |           |           |           |   |           |           |           |
|---|-----------|-----------|-----------|---|-----------|-----------|-----------|
| C | 5.126891  | -1.228452 | 0.866182  | H | -1.692735 | 3.313316  | 5.968555  |
| C | -5.083673 | -1.789467 | -1.298686 | H | -4.722834 | 4.007512  | 3.011193  |
| C | -4.948382 | -2.154845 | 1.350046  | H | -3.122567 | 4.848174  | 4.68153   |
| C | -5.417043 | -0.86201  | 0.913388  | C | 3.891632  | 0.591698  | 4.517744  |
| C | -5.488595 | -0.671676 | -0.481683 | C | 3.880509  | 3.304693  | 4.991898  |
| C | 1.210186  | -3.107372 | 4.640282  | C | 2.963455  | 1.109109  | 5.461393  |
| C | -1.475549 | -2.935815 | 4.660324  | C | 4.688942  | 1.424949  | 3.684834  |
| C | -0.760734 | -1.917941 | 5.397902  | C | 4.682731  | 2.793998  | 3.968902  |
| C | 0.639651  | -2.026233 | 5.414031  | C | 3.007436  | 2.489619  | 5.706393  |
| C | 0.860533  | -1.492756 | -4.934031 | H | 5.278788  | 3.472917  | 3.364583  |
| C | 0.215086  | -0.337525 | -5.456046 | H | 2.326635  | 2.931382  | 6.429695  |
| C | -1.834896 | -1.523948 | -4.912542 | H | 3.894539  | 4.371543  | 5.192439  |
| C | -1.202747 | -0.331346 | -5.383065 | C | 1.449424  | 2.011653  | -5.844437 |
| C | -4.019129 | 2.15982   | -3.349277 | H | 0.679628  | 2.560951  | -6.380823 |
| C | -3.630116 | 4.837452  | -2.833279 | C | 1.294981  | 0.711508  | -5.473407 |
| C | -4.683923 | 2.735124  | -2.232099 | C | 5.575208  | 0.803417  | -3.05394  |
| C | -3.040408 | 2.857959  | -4.10741  | H | 6.350592  | 0.301801  | -2.485059 |
| C | -2.885607 | 4.223433  | -3.840087 | C | 5.815482  | 2.062809  | -3.519981 |
| C | -4.490498 | 4.105535  | -2.016423 | H | 6.761084  | 2.544723  | -3.285437 |
| H | -2.152383 | 4.802236  | -4.395861 | C | -2.202594 | 0.757843  | -5.097026 |
| H | -4.984725 | 4.595236  | -1.181025 | C | -2.112006 | 2.114416  | -4.957667 |
| H | -3.491706 | 5.89728   | -2.64306  | H | -1.261938 | 2.666309  | -5.348074 |
| C | 3.702016  | 2.104198  | -4.727298 | C | -5.384324 | 0.517969  | -1.409984 |
| C | 4.055034  | 4.729201  | -5.526497 | C | -5.349411 | 1.875855  | -1.254384 |
| C | 2.682618  | 2.722926  | -5.513904 | H | -5.703379 | 2.355659  | -0.347645 |
| C | 4.865918  | 2.791032  | -4.32726  | C | -1.740975 | -0.770263 | 5.479322  |
| C | 5.033016  | 4.116174  | -4.751874 | C | -1.651374 | 0.572086  | 5.73874   |
| C | 2.892357  | 4.050509  | -5.896221 | H | -0.795694 | 0.99767   | 6.250638  |
| H | 5.927185  | 4.665549  | -4.469051 | C | -5.137746 | 1.373053  | 2.344029  |
| H | 2.137237  | 4.562483  | -6.487445 | H | -5.542244 | 2.088599  | 1.635597  |
| H | 4.192724  | 5.75793   | -5.845111 | C | -5.197175 | 0.026636  | 2.11702   |
| C | -3.647223 | 1.065899  | 4.328569  | C | 5.16483   | -0.44931  | 2.156694  |
| C | -3.260062 | 3.776914  | 4.572401  | C | 5.286792  | 0.873316  | 2.46799   |
| C | -4.382018 | 1.928198  | 3.469134  | H | 5.697913  | 1.584107  | 1.754417  |
| C | -2.614709 | 1.521657  | 5.19061   | C | 1.888108  | 0.261224  | 5.960591  |
| C | -2.462283 | 2.910304  | 5.315072  | H | 1.126782  | 0.742761  | 6.565393  |
| C | -4.182743 | 3.301964  | 3.637469  | C | 1.772426  | -1.04448  | 5.564741  |

### Intermediate 16a

|   |           |           |           |   |           |           |           |
|---|-----------|-----------|-----------|---|-----------|-----------|-----------|
| C | -2.461209 | -3.59679  | 2.420024  | N | -2.251995 | -4.25678  | -0.033933 |
| C | 2.461209  | -3.59679  | -2.420024 | C | 2.925791  | -3.827702 | -1.101169 |
| C | -2.38845  | -3.597377 | -2.49295  | C | 4.124011  | -3.216996 | -0.630992 |
| C | -2.892066 | -3.827962 | -1.188372 | C | 4.103558  | -3.217155 | 0.753946  |
| C | -4.103558 | -3.217155 | -0.753946 | C | 2.892066  | -3.827962 | 1.188372  |
| C | -4.124011 | -3.216996 | 0.630992  | N | 2.251995  | -4.25678  | 0.033933  |
| C | -2.925791 | -3.827702 | 1.101169  | C | 1.054454  | -3.84326  | 2.94177   |

|   |           |           |           |   |           |           |           |
|---|-----------|-----------|-----------|---|-----------|-----------|-----------|
| C | 0.627114  | -3.232538 | 4.182496  | C | -5.279643 | -1.006986 | -0.785679 |
| C | -0.751285 | -3.232167 | 4.161714  | C | -4.779048 | -2.180114 | 1.273559  |
| C | -1.141271 | -3.842883 | 2.908821  | C | -5.300067 | -1.006551 | 0.627428  |
| N | -0.03277  | -4.244182 | 2.211591  | C | -3.85189  | 1.543773  | 3.752707  |
| C | 1.141271  | -3.842883 | -2.908821 | C | -3.681672 | 4.284251  | 3.589068  |
| C | 0.751285  | -3.232167 | -4.161714 | C | -2.885248 | 2.205438  | 4.556605  |
| C | -0.627114 | -3.232538 | -4.182496 | C | -4.617194 | 2.205987  | 2.756077  |
| C | -1.054454 | -3.84326  | -2.94177  | C | -4.530968 | 3.604356  | 2.71832   |
| N | 0.03277   | -4.244182 | -2.211591 | C | -2.843901 | 3.601892  | 4.472091  |
| C | 2.38845   | -3.597377 | 2.49295   | H | -5.102843 | 4.16123   | 1.98033   |
| H | 1.288321  | -4.5729   | 0.019902  | H | -2.128016 | 4.158627  | 5.0716    |
| H | -1.288321 | -4.5729   | -0.019902 | H | -3.62894  | 5.367417  | 3.539838  |
| C | 3.262872  | -2.608853 | -3.184671 | C | -3.741692 | 1.542368  | -3.868233 |
| C | 3.916738  | 0.137867  | -3.813935 | C | -3.579085 | 4.28313   | -3.702345 |
| C | 4.336619  | -1.914215 | -2.588713 | C | -4.537268 | 2.204742  | -2.895762 |
| C | 2.708405  | -1.914648 | -4.281012 | C | -2.751783 | 2.204174  | -4.643243 |
| C | 2.973119  | -0.5735   | -4.549992 | C | -2.714258 | 3.600768  | -4.5589   |
| C | 4.61928   | -0.571025 | -2.846616 | C | -4.453635 | 3.603224  | -2.856972 |
| C | 2.838009  | -0.574547 | 4.637674  | H | -1.980951 | 4.157527  | -5.136935 |
| C | 4.25844   | -1.915447 | 2.717319  | H | -5.048293 | 4.160386  | -2.13743  |
| C | 3.803641  | 0.13639   | 3.930322  | H | -3.529028 | 5.366403  | -3.652692 |
| C | 2.580724  | -1.915601 | 4.360624  | C | 3.741692  | 1.542368  | 3.868233  |
| C | 3.167383  | -2.609838 | 3.281144  | C | 3.579085  | 4.28313   | 3.702345  |
| C | 4.533935  | -0.572589 | 2.983905  | C | 2.751783  | 2.204174  | 4.643243  |
| C | -2.973119 | -0.5735   | 4.549992  | C | 4.537268  | 2.204742  | 2.895762  |
| C | -4.336619 | -1.914215 | 2.588713  | C | 4.453635  | 3.603224  | 2.856972  |
| C | -3.916738 | 0.137867  | 3.813935  | C | 2.714258  | 3.600768  | 4.5589    |
| C | -2.708405 | -1.914648 | 4.281012  | H | 5.048293  | 4.160386  | 2.13743   |
| C | -3.262872 | -2.608853 | 3.184671  | H | 1.980951  | 4.157527  | 5.136935  |
| C | -4.61928  | -0.571025 | 2.846616  | H | 3.529028  | 5.366403  | 3.652692  |
| C | -4.25844  | -1.915447 | -2.717319 | C | 3.85189   | 1.543773  | -3.752707 |
| C | -2.838009 | -0.574547 | -4.637674 | C | 3.681672  | 4.284251  | -3.589068 |
| C | -4.533935 | -0.572589 | -2.983905 | C | 4.617194  | 2.205987  | -2.756077 |
| C | -3.167383 | -2.609838 | -3.281144 | C | 2.885248  | 2.205438  | -4.556605 |
| C | -2.580724 | -1.915601 | -4.360624 | C | 2.843901  | 3.601892  | -4.472091 |
| C | -3.803641 | 0.13639   | -3.930322 | C | 4.530968  | 3.604356  | -2.71832  |
| C | 1.41035   | -2.189452 | -4.775579 | H | 2.128016  | 4.158627  | -5.0716   |
| C | -1.268196 | -2.190063 | -4.815642 | H | 5.102843  | 4.16123   | -1.98033  |
| C | -0.625106 | -1.009298 | -5.33883  | H | 3.62894   | 5.367417  | -3.539838 |
| C | 0.782552  | -1.00892  | -5.31753  | C | -5.230945 | 1.428176  | -1.870646 |
| C | -1.41035  | -2.189452 | 4.775579  | H | -5.693302 | 1.992499  | -1.068062 |
| C | 1.268196  | -2.190063 | 4.815642  | C | -5.171205 | 0.061046  | -1.847744 |
| C | 0.625106  | -1.009298 | 5.33883   | C | -1.688437 | 0.060259  | -5.252495 |
| C | -0.782552 | -1.00892  | 5.31753   | C | -1.710566 | 1.42583   | -5.315184 |
| C | 4.779048  | -2.180114 | -1.273559 | H | -0.898661 | 1.990067  | -5.760939 |
| C | 4.739808  | -2.180778 | 1.415765  | C | -5.222136 | 0.06207   | 1.691522  |
| C | 5.279643  | -1.006986 | 0.785679  | C | -5.280793 | 1.429279  | 1.711363  |
| C | 5.300067  | -1.006551 | -0.627428 | H | -5.717787 | 1.993524  | 0.894659  |
| C | -4.739808 | -2.180778 | -1.415765 | C | -1.842295 | 0.061125  | 5.19889   |

|   |           |          |          |   |          |          |           |
|---|-----------|----------|----------|---|----------|----------|-----------|
| C | -1.865342 | 1.426734 | 5.260048 | C | 1.688437 | 0.060259 | 5.252495  |
| H | -1.066555 | 1.990556 | 5.72939  | C | 1.842295 | 0.061125 | -5.19889  |
| C | 5.171205  | 0.061046 | 1.847744 | C | 1.865342 | 1.426734 | -5.260048 |
| C | 5.230945  | 1.428176 | 1.870646 | H | 1.066555 | 1.990556 | -5.72939  |
| H | 5.693302  | 1.992499 | 1.068062 | C | 5.280793 | 1.429279 | -1.711363 |
| C | 1.710566  | 1.42583  | 5.315184 | H | 5.717787 | 1.993524 | -0.894659 |
| H | 0.898661  | 1.990067 | 5.760939 | C | 5.222136 | 0.06207  | -1.691522 |

### Intermediate 17a

|   |           |           |           |   |           |           |           |
|---|-----------|-----------|-----------|---|-----------|-----------|-----------|
| C | -3.689124 | 2.409224  | 2.037218  | C | -0.629179 | -4.434884 | 2.752752  |
| C | -3.394595 | -2.404976 | -2.907903 | C | -0.901014 | 2.860432  | 4.494645  |
| C | -3.394595 | 2.404976  | -2.907903 | C | -1.948627 | 4.207189  | 2.3589    |
| C | -3.637756 | 2.872801  | -1.592391 | C | -0.068099 | 3.750914  | 3.821885  |
| C | -2.964854 | 4.025562  | -1.093319 | C | -2.211646 | 2.628412  | 4.074193  |
| C | -3.067462 | 4.034386  | 0.286111  | C | -2.755969 | 3.181837  | 2.894976  |
| C | -3.785201 | 2.876594  | 0.698469  | C | -0.629179 | 4.434884  | 2.752752  |
| N | -4.174409 | 2.242439  | -0.472462 | C | -1.520155 | 4.088475  | -2.952512 |
| C | -3.637756 | -2.872801 | -1.592391 | C | -0.28265  | 2.615508  | -4.90147  |
| C | -2.964854 | -4.025562 | -1.093319 | C | -0.128025 | 4.12043   | -3.079796 |
| C | -3.067462 | -4.034386 | 0.286112  | C | -2.325644 | 3.147437  | -3.627658 |
| C | -3.785201 | -2.876594 | 0.698469  | C | -1.687189 | 2.595174  | -4.756212 |
| N | -4.174409 | -2.242439 | -0.472462 | C | 0.508854  | 3.272229  | -3.976695 |
| C | -4.009426 | -1.096419 | 2.498353  | C | -2.154877 | -1.386369 | -5.346669 |
| C | -3.543818 | -0.691046 | 3.810806  | C | -2.154877 | 1.386369  | -5.346669 |
| C | -3.543818 | 0.691046  | 3.810806  | C | -1.028327 | 0.684568  | -5.884922 |
| C | -4.009426 | 1.096419  | 2.498353  | C | -1.028327 | -0.684568 | -5.884922 |
| N | -4.341083 | 0         | 1.749453  | C | -2.577748 | 1.34331   | 4.546455  |
| C | -3.710139 | -1.101617 | -3.421503 | C | -2.577748 | -1.34331  | 4.546455  |
| C | -3.168565 | -0.706378 | -4.706475 | C | -1.480787 | -0.701883 | 5.23541   |
| C | -3.168565 | 0.706378  | -4.706475 | C | -1.480787 | 0.701883  | 5.23541   |
| C | -3.710139 | 1.101617  | -3.421503 | C | -1.818707 | -4.562218 | -1.658949 |
| N | -4.076295 | 0         | -2.697372 | C | -2.04958  | -4.622036 | 1.014297  |
| C | -3.689124 | -2.409224 | 2.037218  | C | -0.780734 | -5.028211 | 0.47865   |
| H | -4.546868 | -1.29977  | -0.493162 | C | -0.642011 | -4.931673 | -0.921648 |
| H | -4.546868 | 1.29977   | -0.493162 | C | -1.818707 | 4.562218  | -1.658949 |
| C | -2.325644 | -3.147437 | -3.627658 | C | -0.642011 | 4.931673  | -0.921648 |
| C | 0.508854  | -3.272229 | -3.976695 | C | -2.04958  | 4.622036  | 1.014297  |
| C | -1.520155 | -4.088475 | -2.952512 | C | -0.780734 | 5.028211  | 0.47865   |
| C | -1.687189 | -2.595174 | -4.756212 | C | 1.332156  | 3.640809  | 3.93098   |
| C | -0.28265  | -2.615508 | -4.90147  | C | 4.06431   | 3.385584  | 4.117463  |
| C | -0.128025 | -4.12043  | -3.079796 | C | 1.856779  | 2.698048  | 4.853628  |
| C | -0.901014 | -2.860432 | 4.494645  | C | 2.137352  | 4.336327  | 2.988697  |
| C | -1.948627 | -4.207189 | 2.3589    | C | 3.525892  | 4.208443  | 3.12968   |
| C | -0.068099 | -3.750914 | 3.821885  | C | 3.251069  | 2.612883  | 4.946943  |
| C | -2.211646 | -2.628412 | 4.074193  | H | 4.188778  | 4.72692   | 2.441598  |
| C | -2.755969 | -3.181837 | 2.894976  | H | 3.7047    | 1.91244   | 5.643724  |

|   |          |           |           |   |           |           |           |
|---|----------|-----------|-----------|---|-----------|-----------|-----------|
| H | 5.142892 | 3.300582  | 4.205783  | H | 4.246251  | -0.852333 | -4.98192  |
| C | 1.822739 | 2.809212  | -3.727212 | H | 4.479261  | -3.645086 | -1.761163 |
| C | 4.482697 | 2.262448  | -3.409365 | H | 5.552973  | -2.087772 | -3.360945 |
| C | 2.532421 | 3.4701    | -2.685833 | C | 1.822769  | 4.325686  | -1.733684 |
| C | 2.338361 | 1.668096  | -4.429141 | H | 2.382299  | 4.617694  | -0.850628 |
| C | 3.722116 | 1.521685  | -4.321148 | C | 0.489477  | 4.603069  | -1.865606 |
| C | 3.891642 | 3.161617  | -2.537081 | C | 0.169801  | 1.373681  | -5.516424 |
| H | 4.246251 | 0.852333  | -4.98192  | C | 1.377257  | 0.752717  | -5.156039 |
| H | 4.479261 | 3.645086  | -1.761163 | C | 0.158386  | 4.948248  | 1.652139  |
| H | 5.552973 | 2.087772  | -3.360945 | C | 1.515232  | 4.966638  | 1.826224  |
| C | 1.332156 | -3.640809 | 3.93098   | H | 2.181902  | 5.352568  | 1.060325  |
| C | 4.06431  | -3.385584 | 4.117463  | C | -0.383881 | 1.736142  | 5.24544   |
| C | 1.856779 | -2.698048 | 4.853628  | C | 0.961866  | 1.733236  | 5.490182  |
| C | 2.137352 | -4.336327 | 2.988697  | H | 1.435523  | 0.948714  | 6.067967  |
| C | 3.525892 | -4.208443 | 3.12968   | C | 0.158386  | -4.948248 | 1.652139  |
| C | 3.251069 | -2.612883 | 4.946943  | C | 1.515232  | -4.966638 | 1.826224  |
| H | 4.188778 | -4.72692  | 2.441598  | H | 2.181902  | -5.352568 | 1.060325  |
| H | 3.7047   | -1.91244  | 5.643724  | C | 0.961866  | -1.733236 | 5.490182  |
| H | 5.142892 | -3.300582 | 4.205783  | H | 1.435523  | -0.948714 | 6.067967  |
| C | 1.822739 | -2.809212 | -3.727212 | C | -0.383881 | -1.736142 | 5.24544   |
| C | 4.482697 | -2.262448 | -3.409365 | C | 0.169801  | -1.373681 | -5.516424 |
| C | 2.532421 | -3.4701   | -2.685833 | C | 1.377257  | -0.752717 | -5.156039 |
| C | 2.338361 | -1.668096 | -4.429141 | C | 1.822769  | -4.325686 | -1.733684 |
| C | 3.722116 | -1.521685 | -4.321148 | H | 2.382299  | -4.617694 | -0.850628 |
| C | 3.891642 | -3.161617 | -2.537081 | C | 0.489477  | -4.603069 | -1.865606 |

### Intermediate 18c

|   |           |           |           |   |           |           |           |
|---|-----------|-----------|-----------|---|-----------|-----------|-----------|
| C | -3.599557 | 2.374968  | 1.866802  | C | -3.031695 | -0.750915 | -4.851448 |
| C | -3.243778 | -2.455598 | -3.058213 | C | -3.048492 | 0.664165  | -4.854041 |
| C | -3.30078  | 2.369423  | -3.066842 | C | -3.592161 | 1.055156  | -3.570676 |
| C | -3.558628 | 2.840818  | -1.759427 | N | -3.93945  | -0.050551 | -2.842042 |
| C | -2.910866 | 4.008913  | -1.26589  | C | -3.543718 | -2.452419 | 1.87515   |
| C | -3.015179 | 4.018097  | 0.114384  | H | -4.403222 | -1.354333 | -0.652856 |
| C | -3.706123 | 2.843182  | 0.528355  | H | -4.433173 | 1.248806  | -0.657691 |
| N | -4.083518 | 2.200389  | -0.638038 | C | -2.172208 | -3.198161 | -3.779161 |
| C | -3.490732 | -2.928628 | -1.749431 | C | 0.685193  | -3.303258 | -4.119402 |
| C | -2.815439 | -4.07946  | -1.252032 | C | -1.359507 | -4.139716 | -3.110152 |
| C | -2.920216 | -4.086827 | 0.128201  | C | -1.541629 | -2.641362 | -4.907107 |
| C | -3.638966 | -2.927268 | 0.53832   | C | -0.134473 | -2.650888 | -5.038929 |
| N | -4.031262 | -2.297361 | -0.630231 | C | 0.041687  | -4.17034  | -3.23375  |
| C | -3.869291 | -1.138199 | 2.328334  | C | -0.740357 | -2.873279 | 4.318461  |
| C | -3.400222 | -0.724222 | 3.637111  | C | -1.799425 | -4.245119 | 2.202452  |
| C | -3.416196 | 0.65687   | 3.634652  | C | 0.088291  | -3.772114 | 3.652498  |
| C | -3.894522 | 1.055344  | 2.324506  | C | -2.05419  | -2.650157 | 3.904017  |
| N | -4.217882 | -0.046735 | 1.579061  | C | -2.604646 | -3.21549  | 2.733445  |
| C | -3.566078 | -1.150089 | -3.566573 | C | -0.478528 | -4.467679 | 2.59331   |

|   |           |           |           |   |           |           |           |
|---|-----------|-----------|-----------|---|-----------|-----------|-----------|
| C | -0.806242 | 2.868747  | 4.307699  | C | 3.722839  | 2.755596  | -2.207498 |
| C | -1.897604 | 4.209037  | 2.18774   | H | 4.298864  | 3.227329  | -1.415582 |
| C | 0.001255  | 3.784119  | 3.638171  | H | 4.971315  | 1.052206  | -2.215957 |
| C | -2.114823 | 2.614058  | 3.894686  | C | 1.488663  | -3.663147 | 3.755796  |
| C | -2.67832  | 3.162609  | 2.722354  | C | 4.221399  | -3.414926 | 3.930522  |
| C | -0.581989 | 4.463311  | 2.577176  | C | 2.018359  | -2.704373 | 4.659116  |
| C | -1.45727  | 4.097669  | -3.125014 | C | 2.288515  | -4.381638 | 2.826418  |
| C | -0.197069 | 2.631385  | -5.04883  | C | 3.677886  | -4.257135 | 2.961778  |
| C | -0.057367 | 4.161402  | -3.249249 | C | 3.413245  | -2.622057 | 4.746066  |
| C | -2.24725  | 3.134655  | -3.790768 | H | 4.33728   | -4.794312 | 2.284655  |
| C | -1.603727 | 2.588906  | -4.916868 | H | 3.8717    | -1.910218 | 5.427936  |
| C | 0.606626  | 3.306648  | -4.13183  | H | 5.300523  | -3.332824 | 4.015191  |
| C | -2.022148 | -1.430154 | -5.500486 | C | 1.940591  | -2.727964 | -3.744301 |
| C | -2.055373 | 1.364654  | -5.505818 | C | 4.13212   | -1.420229 | -2.657294 |
| C | -0.92681  | 0.670293  | -6.045709 | C | 2.600956  | -3.300528 | -2.630776 |
| C | -0.910436 | -0.711412 | -6.043268 | C | 2.284158  | -1.414819 | -4.215884 |
| C | -2.452939 | 1.320834  | 4.362104  | C | 3.312268  | -0.705089 | -3.564061 |
| C | -2.422054 | -1.363421 | 4.366825  | C | 3.7869    | -2.671115 | -2.197037 |
| C | -1.323107 | -0.709018 | 5.042279  | H | 4.373926  | -3.125896 | -1.403285 |
| C | -1.339131 | 0.694141  | 5.039472  | H | 4.994245  | -0.938539 | -2.211417 |
| C | -1.668897 | -4.61713  | -1.819431 | C | 1.836336  | 4.320174  | -1.800762 |
| C | -1.903546 | -4.670629 | 0.860673  | H | 2.340005  | 4.590059  | -0.87907  |
| C | -0.636977 | -5.084419 | 0.326195  | C | 0.525993  | 4.651589  | -2.020246 |
| C | -0.498601 | -4.988895 | -1.074683 | C | 0.240898  | 1.384532  | -5.639659 |
| C | -1.777636 | 4.571877  | -1.835657 | C | 1.364847  | 0.733043  | -5.128954 |
| C | -0.616285 | 4.973577  | -1.092559 | C | 0.187993  | 5.009264  | 1.479923  |
| C | -2.012144 | 4.627944  | 0.844605  | C | 1.543572  | 5.073026  | 1.658158  |
| C | -0.756    | 5.069693  | 0.308292  | H | 2.197558  | 5.500854  | 0.903711  |
| C | 1.403906  | 3.70713   | 3.740569  | C | -0.26035  | 1.748483  | 5.044647  |
| C | 4.141739  | 3.519948  | 3.912513  | C | 1.087751  | 1.768894  | 5.275232  |
| C | 1.955792  | 2.762985  | 4.646025  | H | 1.583046  | 0.984923  | 5.835949  |
| C | 2.186524  | 4.440468  | 2.808177  | C | 0.304581  | -4.998865 | 1.498129  |
| C | 3.578496  | 4.34707   | 2.94203   | C | 1.661075  | -5.031341 | 1.677446  |
| C | 3.352254  | 2.7119    | 4.731398  | H | 2.325132  | -5.446262 | 0.92455   |
| H | 4.225005  | 4.896831  | 2.262567  | C | 1.127338  | -1.727952 | 5.284046  |
| H | 3.827159  | 2.012285  | 5.414655  | H | 1.604246  | -0.931455 | 5.843121  |
| H | 5.222535  | 3.461884  | 3.995968  | C | -0.220647 | -1.738362 | 5.051888  |
| C | 1.875333  | 2.762807  | -3.754608 | C | 0.273857  | -1.396251 | -5.634583 |
| C | 4.097782  | 1.511533  | -2.663169 | C | 1.381984  | -0.716309 | -5.126388 |
| C | 2.522195  | 3.354782  | -2.643481 | C | 1.93816   | -4.27883  | -1.78449  |
| C | 2.250065  | 1.45645   | -4.221234 | H | 2.44793   | -4.533363 | -0.861739 |
| C | 3.294803  | 0.773708  | -3.566949 | C | 0.636153  | -4.6424   | -2.002981 |

**Intermediate 19b**

|   |           |           |           |   |           |           |           |
|---|-----------|-----------|-----------|---|-----------|-----------|-----------|
| C | -3.587564 | 2.395788  | 2.074494  | C | -1.588072 | 2.605192  | -4.778303 |
| C | -3.238893 | -2.400883 | -2.879082 | C | 0.673791  | 3.264679  | -4.0857   |
| C | -3.238893 | 2.400883  | -2.879082 | C | -2.086478 | -1.397399 | -5.365713 |
| C | -3.460032 | 2.86173   | -1.559149 | C | -2.086478 | 1.397399  | -5.365713 |
| C | -2.731345 | 3.973444  | -1.05181  | C | -0.993225 | 0.691258  | -5.963012 |
| C | -2.826103 | 3.971005  | 0.326918  | C | -0.993225 | -0.691258 | -5.963012 |
| C | -3.617532 | 2.855996  | 0.730708  | C | -2.772513 | 1.387791  | 4.690855  |
| N | -4.030118 | 2.248807  | -0.446492 | C | -2.772513 | -1.387791 | 4.690855  |
| C | -3.460032 | -2.86173  | -1.559149 | C | -1.760917 | -0.684743 | 5.427551  |
| C | -2.731345 | -3.973444 | -1.05181  | C | -1.760917 | 0.684743  | 5.427551  |
| C | -2.826103 | -3.971005 | 0.326918  | C | -1.574925 | -4.475454 | -1.626124 |
| C | -3.617532 | -2.855996 | 0.730708  | C | -1.75448  | -4.460026 | 1.052916  |
| N | -4.030118 | -2.248807 | -0.446492 | C | -0.458167 | -4.749916 | 0.505835  |
| C | -3.994402 | -1.100178 | 2.536698  | C | -0.368021 | -4.764293 | -0.903256 |
| C | -3.666529 | -0.706673 | 3.894934  | C | -1.574925 | 4.475454  | -1.626124 |
| C | -3.666529 | 0.706673  | 3.894934  | C | -0.368021 | 4.764293  | -0.903256 |
| C | -3.994402 | 1.100178  | 2.536698  | C | -1.75448  | 4.460026  | 1.052916  |
| N | -4.25314  | 0         | 1.765703  | C | -0.458167 | 4.749916  | 0.505835  |
| C | -3.575682 | -1.101491 | -3.389272 | C | 1.448576  | 2.76251   | 3.797833  |
| C | -3.069039 | -0.707845 | -4.688244 | C | 4.121286  | 2.236484  | 4.022741  |
| C | -3.069039 | 0.707845  | -4.688244 | C | 1.822933  | 1.650192  | 4.619716  |
| C | -3.575682 | 1.101491  | -3.389272 | C | 2.342972  | 3.39988   | 2.894004  |
| N | -3.928118 | 0         | -2.657673 | C | 3.706922  | 3.104779  | 3.025584  |
| C | -3.587564 | -2.395788 | 2.074494  | C | 3.201262  | 1.511899  | 4.789326  |
| H | -4.442117 | -1.323209 | -0.476619 | H | 4.433085  | 3.573847  | 2.366864  |
| H | -4.442117 | 1.323209  | -0.476619 | H | 3.588104  | 0.864125  | 5.558275  |
| C | -2.173899 | -3.13932  | -3.614702 | H | 5.181418  | 2.073625  | 4.189663  |
| C | 0.673791  | -3.264679 | -4.0857   | C | 1.966659  | 2.717689  | -3.814403 |
| C | -1.324155 | -4.04708  | -2.945413 | C | 4.279925  | 1.4627    | -2.943114 |
| C | -1.588072 | -2.605192 | -4.778303 | C | 2.689968  | 3.279308  | -2.734585 |
| C | -0.188542 | -2.628864 | -4.978491 | C | 2.310028  | 1.429319  | -4.344481 |
| C | 0.0689    | -4.075668 | -3.125822 | C | 3.404359  | 0.738361  | -3.788797 |
| C | -0.842562 | -2.600619 | 4.569503  | C | 3.932915  | 2.688558  | -2.422252 |
| C | -1.693686 | -4.022681 | 2.390764  | H | 4.569656  | 3.146065  | -1.669457 |
| C | 0.110711  | -3.221313 | 3.7821    | H | 5.192492  | 1.001086  | -2.585107 |
| C | -2.200317 | -2.587268 | 4.177752  | C | 1.448576  | -2.76251  | 3.797833  |
| C | -2.62799  | -3.122887 | 2.94568   | C | 4.121286  | -2.236484 | 4.022741  |
| C | -0.344843 | -4.028984 | 2.749914  | C | 1.822933  | -1.650192 | 4.619716  |
| C | -0.842562 | 2.600619  | 4.569503  | C | 2.342972  | -3.39988  | 2.894004  |
| C | -1.693686 | 4.022681  | 2.390764  | C | 3.706922  | -3.104779 | 3.025584  |
| C | 0.110711  | 3.221313  | 3.7821    | C | 3.201262  | -1.511899 | 4.789326  |
| C | -2.200317 | 2.587268  | 4.177752  | H | 4.433085  | -3.573847 | 2.366864  |
| C | -2.62799  | 3.122887  | 2.94568   | H | 3.588104  | -0.864125 | 5.558275  |
| C | -0.344843 | 4.028984  | 2.749914  | H | 5.181418  | -2.073625 | 4.189663  |
| C | -1.324155 | 4.04708   | -2.945413 | C | 1.966659  | -2.717689 | -3.814403 |
| C | -0.188542 | 2.628864  | -4.978491 | C | 4.279925  | -1.4627   | -2.943114 |
| C | 0.0689    | 4.075668  | -3.125822 | C | 2.689968  | -3.279308 | -2.734585 |
| C | -2.173899 | 3.13932   | -3.614702 | C | 2.310028  | -1.429319 | -4.344481 |

|   |          |           |           |   |          |           |           |
|---|----------|-----------|-----------|---|----------|-----------|-----------|
| C | 3.404359 | -0.738361 | -3.788797 | C | -0.51547 | 1.372068  | 5.283064  |
| C | 3.932915 | -2.688558 | -2.422252 | C | 0.738467 | 0.749801  | 5.163724  |
| H | 4.569656 | -3.146065 | -1.669457 | C | 0.485459 | -4.456304 | 1.646681  |
| H | 5.192492 | -1.001086 | -2.585107 | C | 1.824202 | -4.212654 | 1.793583  |
| C | 2.052074 | 4.187933  | -1.798058 | H | 2.54911  | -4.518768 | 1.04643   |
| H | 2.625255 | 4.452362  | -0.916279 | C | 0.738467 | -0.749801 | 5.163724  |
| C | 0.720793 | 4.488453  | -1.903551 | C | -0.51547 | -1.372068 | 5.283064  |
| C | 0.202961 | 1.389902  | -5.618165 | C | 0.202961 | -1.389902 | -5.618165 |
| C | 1.353962 | 0.724129  | -5.19267  | C | 1.353962 | -0.724129 | -5.19267  |
| C | 0.485459 | 4.456304  | 1.646681  | C | 2.052074 | -4.187933 | -1.798058 |
| C | 1.824202 | 4.212654  | 1.793583  | H | 2.625255 | -4.452362 | -0.916279 |
| H | 2.54911  | 4.518768  | 1.04643   | C | 0.720793 | -4.488453 | -1.903551 |

### Intermediate 20b

|   |           |           |           |   |           |           |           |
|---|-----------|-----------|-----------|---|-----------|-----------|-----------|
| C | 2.402722  | 2.478283  | -3.329218 | C | -2.629716 | 4.77999   | -0.43148  |
| C | -2.402722 | -2.478283 | -3.329218 | C | -4.051607 | 2.67729   | -1.426864 |
| C | 2.402722  | -2.478282 | -3.329218 | C | -3.267102 | 3.949012  | 0.488668  |
| C | 2.86615   | -1.145987 | -3.456823 | C | -2.607202 | 4.486053  | -1.814748 |
| C | 3.982656  | -0.691054 | -2.698766 | C | -3.141584 | 3.28566   | -2.31946  |
| C | 3.982656  | 0.691054  | -2.698766 | C | -4.080206 | 2.951429  | -0.050347 |
| C | 2.86615   | 1.145987  | -3.456823 | C | 2.629716  | 4.77999   | -0.43148  |
| N | 2.254275  | 0         | -3.947504 | C | 4.051607  | 2.67729   | -1.426864 |
| C | -2.86615  | -1.145987 | -3.456823 | C | 3.267102  | 3.949012  | 0.488668  |
| C | -3.982656 | -0.691054 | -2.698766 | C | 2.607202  | 4.486053  | -1.814748 |
| C | -3.982656 | 0.691054  | -2.698766 | C | 3.141584  | 3.28566   | -2.31946  |
| C | -2.86615  | 1.145987  | -3.456823 | C | 4.080206  | 2.951429  | -0.050347 |
| N | -2.254275 | 0         | -3.947504 | C | 4.051607  | -2.67729  | -1.426864 |
| C | -1.101392 | 2.959619  | -3.697625 | C | 2.629716  | -4.77999  | -0.43148  |
| C | -0.707676 | 4.291833  | -3.283291 | C | 4.080206  | -2.951429 | -0.050347 |
| C | 0.707676  | 4.291833  | -3.283291 | C | 3.141584  | -3.28566  | -2.31946  |
| C | 1.101392  | 2.959619  | -3.697625 | C | 2.607202  | -4.486053 | -1.814748 |
| N | 0         | 2.205461  | -4.000787 | C | 3.267102  | -3.949012 | 0.488668  |
| C | -1.101392 | -2.959619 | -3.697625 | C | -1.398058 | -5.034986 | -2.350819 |
| C | -0.707676 | -4.291833 | -3.283291 | C | 1.398058  | -5.034986 | -2.350819 |
| C | 0.707676  | -4.291833 | -3.283291 | C | 0.690889  | -5.705477 | -1.300192 |
| C | 1.101392  | -2.959619 | -3.697625 | C | -0.690889 | -5.705477 | -1.300192 |
| N | 0         | -2.205461 | -4.000787 | C | 1.398058  | 5.034986  | -2.350819 |
| C | -2.402722 | 2.478282  | -3.329218 | C | -1.398058 | 5.034986  | -2.350819 |
| H | -1.325969 | 0         | -4.354862 | C | -0.690889 | 5.705477  | -1.300192 |
| H | 1.325969  | 0         | -4.354862 | C | 0.690889  | 5.705477  | -1.300192 |
| C | -3.141584 | -3.28566  | -2.31946  | C | -4.484814 | -1.344957 | -1.586133 |
| C | -3.267102 | -3.949012 | 0.488668  | C | -4.484814 | 1.344957  | -1.586133 |
| C | -4.051607 | -2.67729  | -1.426864 | C | -4.785413 | 0.707196  | -0.3353   |
| C | -2.607202 | -4.486053 | -1.814748 | C | -4.785413 | -0.707196 | -0.3353   |
| C | -2.629716 | -4.77999  | -0.43148  | C | 4.484814  | -1.344957 | -1.586133 |
| C | -4.080206 | -2.951429 | -0.050347 | C | 4.785413  | -0.707196 | -0.3353   |



|   |           |           |           |   |           |           |           |
|---|-----------|-----------|-----------|---|-----------|-----------|-----------|
| C | 4.484814  | 1.344957  | -1.586133 | C | -1.464575 | -3.043973 | 4.159633  |
| C | 4.785413  | 0.707196  | -0.3353   | C | -3.288559 | -2.742302 | 2.59266   |
| C | 2.720339  | 3.765241  | 1.796667  | C | -1.429793 | -4.312235 | 2.102311  |
| C | 1.464575  | 3.043973  | 4.159633  | C | -0.73861  | -3.828014 | 3.229979  |
| C | 1.429793  | 4.312235  | 2.102311  | C | -2.695507 | -2.509235 | 3.851775  |
| C | 3.288559  | 2.742302  | 2.59266   | H | -3.155802 | -1.803908 | 4.539019  |
| C | 2.695507  | 2.509235  | 3.851775  | H | -1.002129 | -2.744218 | 5.09259   |
| C | 0.73861   | 3.828014  | 3.229979  | C | 4.209547  | -1.773854 | 2.022179  |
| H | 3.155802  | 1.803908  | 4.539019  | H | 4.493658  | -0.948028 | 2.663834  |
| H | 1.002129  | 2.744218  | 5.09259   | C | 4.503678  | -1.779848 | 0.684586  |
| C | 2.720339  | -3.765241 | 1.796667  | C | 1.390144  | -5.443246 | -0.083779 |
| C | 1.464575  | -3.043973 | 4.159633  | C | 0.724131  | -5.094639 | 1.09252   |
| C | 3.288559  | -2.742302 | 2.59266   | C | 4.503678  | 1.779848  | 0.684586  |
| C | 1.429793  | -4.312235 | 2.102311  | C | 4.209547  | 1.773854  | 2.022179  |
| C | 0.73861   | -3.828014 | 3.229979  | H | 4.493658  | 0.948028  | 2.663834  |
| C | 2.695507  | -2.509235 | 3.851775  | C | 1.390144  | 5.443246  | -0.083779 |
| H | 3.155802  | -1.803909 | 4.539019  | C | 0.724131  | 5.094639  | 1.09252   |
| H | 1.002129  | -2.744218 | 5.09259   | C | -4.503678 | 1.779848  | 0.684586  |
| C | -2.720339 | 3.765241  | 1.796667  | C | -4.209547 | 1.773854  | 2.022179  |
| C | -1.464575 | 3.043973  | 4.159633  | H | -4.493658 | 0.948028  | 2.663834  |
| C | -1.429793 | 4.312235  | 2.102311  | C | -0.724131 | 5.094639  | 1.09252   |
| C | -3.288559 | 2.742302  | 2.59266   | C | -1.390144 | 5.443246  | -0.083779 |
| C | -2.695507 | 2.509235  | 3.851775  | C | -1.390144 | -5.443246 | -0.083779 |
| C | -0.73861  | 3.828014  | 3.229979  | C | -0.724131 | -5.094639 | 1.09252   |
| H | -3.155802 | 1.803908  | 4.539019  | C | -4.209547 | -1.773854 | 2.022179  |
| H | -1.002129 | 2.744218  | 5.09259   | H | -4.493658 | -0.948028 | 2.663834  |
| C | -2.720339 | -3.765241 | 1.796667  | C | -4.503678 | -1.779848 | 0.684586  |

### Intermediate 21a

|   |           |           |           |   |           |           |           |
|---|-----------|-----------|-----------|---|-----------|-----------|-----------|
| C | 3.145795  | 2.456129  | -2.770833 | N | 0.849157  | 2.201977  | -3.783716 |
| C | -1.650552 | -2.481402 | -3.54755  | C | -0.321736 | -2.962037 | -3.652537 |
| C | 3.145795  | -2.456129 | -2.770833 | C | -0.004023 | -4.260705 | -3.115479 |
| C | 3.665267  | -1.150841 | -2.904383 | C | 1.388848  | -4.252752 | -2.869187 |
| C | 4.755915  | -0.706419 | -2.085353 | C | 1.858605  | -2.930078 | -3.28129  |
| C | 4.755915  | 0.706419  | -2.085353 | N | 0.849157  | -2.201977 | -3.783716 |
| C | 3.665267  | 1.150841  | -2.904383 | C | -1.650552 | 2.481402  | -3.54755  |
| N | 3.107244  | 0         | -3.462368 | H | -0.398412 | 0         | -4.330471 |
| C | -2.100845 | -1.143164 | -3.79985  | H | 2.194049  | 0         | -3.903745 |
| C | -3.361715 | -0.694078 | -3.332184 | C | -2.587072 | -3.277319 | -2.701396 |
| C | -3.361715 | 0.694078  | -3.332184 | C | -3.291573 | -3.810655 | 0.043898  |
| C | -2.100845 | 1.143164  | -3.79985  | C | -3.692465 | -2.667856 | -2.063272 |
| N | -1.390082 | 0         | -4.117898 | C | -2.145541 | -4.434771 | -2.035955 |
| C | -0.321736 | 2.962037  | -3.652537 | C | -2.442788 | -4.650633 | -0.661832 |
| C | -0.004023 | 4.260705  | -3.115479 | C | -4.025419 | -2.899771 | -0.722153 |
| C | 1.388848  | 4.252752  | -2.869187 | C | -2.442788 | 4.650633  | -0.661832 |
| C | 1.858605  | 2.930078  | -3.28129  | C | -3.692465 | 2.667856  | -2.063272 |

|   |           |           |           |   |           |           |           |
|---|-----------|-----------|-----------|---|-----------|-----------|-----------|
| C | -3.291573 | 3.810655  | 0.043898  | C | 0.711393  | -2.105615 | 4.248191  |
| C | -2.145541 | 4.434771  | -2.035955 | C | 2.706283  | -1.716311 | 2.876883  |
| C | -2.587072 | 3.277319  | -2.701396 | C | 1.071682  | -3.559442 | 2.390328  |
| C | -4.025419 | 2.899771  | -0.722153 | C | 0.167667  | -3.013076 | 3.315534  |
| C | 2.739102  | 4.424028  | 0.275091  | C | 1.931317  | -1.49646  | 4.036687  |
| C | 4.543568  | 2.63082   | -0.681106 | H | 2.297469  | -0.834011 | 4.800248  |
| C | 3.193379  | 3.442949  | 1.165698  | H | 0.140436  | -1.805164 | 5.120257  |
| C | 3.00763   | 4.336043  | -1.100413 | C | -3.013971 | 3.489506  | 1.413139  |
| C | 3.69801   | 3.229907  | -1.633863 | C | -2.210805 | 2.385307  | 3.831834  |
| C | 4.232311  | 2.664091  | 0.716814  | C | -1.748232 | 3.858314  | 1.971021  |
| C | 4.543568  | -2.63082  | -0.681106 | C | -3.805887 | 2.485005  | 2.010602  |
| C | 2.739102  | -4.424028 | 0.275091  | C | -3.442231 | 2.057367  | 3.304604  |
| C | 4.232311  | -2.664091 | 0.716814  | C | -1.284787 | 3.175417  | 3.114882  |
| C | 3.69801   | -3.229907 | -1.633863 | H | -4.07436  | 1.346808  | 3.831063  |
| C | 3.00763   | -4.336043 | -1.100413 | H | -1.911619 | 1.91459   | 4.76165   |
| C | 3.193379  | -3.442949 | 1.165698  | C | -3.013971 | -3.489506 | 1.413139  |
| C | -0.851858 | -4.976516 | -2.291109 | C | -2.210805 | -2.385308 | 3.831834  |
| C | 1.894817  | -4.925115 | -1.782906 | C | -3.805887 | -2.485005 | 2.010602  |
| C | 1.006951  | -5.50196  | -0.814747 | C | -1.748232 | -3.858314 | 1.971021  |
| C | -0.34587  | -5.536937 | -1.073422 | C | -1.284787 | -3.175418 | 3.114882  |
| C | 1.894817  | 4.925115  | -1.782906 | C | -3.442231 | -2.057367 | 3.304604  |
| C | -0.851858 | 4.976516  | -2.291109 | H | -4.074361 | -1.346808 | 3.831063  |
| C | -0.34587  | 5.536937  | -1.073422 | H | -1.911619 | -1.91459  | 4.76165   |
| C | 1.006951  | 5.50196   | -0.814747 | C | 3.727244  | -0.768972 | 2.290433  |
| C | -4.123849 | -1.352179 | -2.369833 | C | 4.539177  | -1.378764 | 1.314004  |
| C | -4.123849 | 1.352179  | -2.369833 | C | 1.459267  | -5.059253 | 0.464102  |
| C | -4.741084 | 0.710997  | -1.256405 | C | 0.591987  | -4.560564 | 1.431221  |
| C | -4.741084 | -0.710997 | -1.256405 | C | 4.539177  | 1.378764  | 1.314004  |
| C | 5.13597   | -1.386476 | -0.940395 | C | 3.727244  | 0.768972  | 2.290433  |
| C | 5.265781  | -0.676972 | 0.300256  | C | 1.459267  | 5.059253  | 0.464102  |
| C | 5.13597   | 1.386476  | -0.940395 | C | 0.591987  | 4.560564  | 1.431221  |
| C | 5.265781  | 0.676972  | 0.300256  | C | -4.671929 | 1.736636  | -0.160961 |
| C | 2.363599  | 2.946118  | 2.219339  | C | -4.695273 | 1.665082  | 1.205616  |
| C | 0.711393  | 2.105615  | 4.248191  | H | -5.205802 | 0.869283  | 1.727844  |
| C | 1.071683  | 3.559442  | 2.390328  | C | -0.831011 | 4.675455  | 1.191091  |
| C | 2.706283  | 1.716311  | 2.876883  | C | -1.262729 | 5.198529  | -0.032958 |
| C | 1.931317  | 1.49646   | 4.036687  | C | -1.262729 | -5.198529 | -0.032958 |
| C | 0.167667  | 3.013076  | 3.315534  | C | -0.831011 | -4.675455 | 1.191091  |
| H | 2.29747   | 0.834011  | 4.800248  | C | -4.695273 | -1.665082 | 1.205616  |
| H | 0.140436  | 1.805164  | 5.120257  | H | -5.205802 | -0.869283 | 1.727844  |
| C | 2.363599  | -2.946118 | 2.219339  | C | -4.671929 | -1.736636 | -0.160961 |

### Intermediate 22a

|   |           |           |           |   |           |           |           |
|---|-----------|-----------|-----------|---|-----------|-----------|-----------|
| C | 2.455791  | -3.332499 | -2.482006 | C | -1.150707 | -3.860625 | -2.59984  |
| C | -2.478562 | 1.426328  | -3.477065 | C | -0.708058 | -4.935855 | -1.757844 |
| C | -2.455791 | -3.332499 | -2.482006 | C | 0.708058  | -4.935855 | -1.757844 |

|   |           |           |           |   |           |           |           |
|---|-----------|-----------|-----------|---|-----------|-----------|-----------|
| C | 1.150707  | -3.860625 | -2.59984  | C | 4.956141  | 0.682647  | -2.149605 |
| N | 0         | -3.314235 | -3.165768 | C | 5.493086  | 0.236126  | -0.898168 |
| C | -1.143867 | 1.861569  | -3.756199 | C | 5.450454  | -1.099992 | -0.570604 |
| C | -0.694223 | 3.148868  | -3.36096  | C | -1.353469 | 3.966338  | -2.447809 |
| C | 0.694223  | 3.148868  | -3.36096  | C | 1.353469  | 3.966338  | -2.447809 |
| C | 1.143867  | 1.861569  | -3.756199 | C | 0.709961  | 4.655321  | -1.374685 |
| N | 0         | 1.134957  | -4.038552 | C | -0.709961 | 4.655321  | -1.374685 |
| C | 2.957457  | 0.088913  | -3.50829  | C | -1.398032 | -5.307045 | -0.614154 |
| C | 4.252363  | -0.203059 | -2.942095 | C | -0.684069 | -5.444062 | 0.621169  |
| C | 4.241974  | -1.581054 | -2.629281 | C | 1.398032  | -5.307045 | -0.614154 |
| C | 2.928529  | -2.070817 | -3.037023 | C | 0.684069  | -5.444062 | 0.621169  |
| N | 2.20219   | -1.081209 | -3.592792 | C | 2.804514  | -2.320524 | 2.429363  |
| C | -2.957457 | 0.088913  | -3.50829  | C | 1.435618  | -0.363577 | 3.824459  |
| C | -4.252363 | -0.203059 | -2.942096 | C | 3.378864  | -1.01106  | 2.53725   |
| C | -4.241974 | -1.581054 | -2.629281 | C | 1.463411  | -2.580106 | 2.883867  |
| C | -2.928529 | -2.070817 | -3.037023 | C | 0.748849  | -1.542561 | 3.532948  |
| N | -2.20219  | -1.081209 | -3.592792 | C | 2.686469  | -0.035048 | 3.28702   |
| C | 2.478562  | 1.426328  | -3.477065 | H | 0.895077  | 0.437683  | 4.301681  |
| H | 0         | 0.132589  | -4.19351  | C | -2.804514 | -2.320524 | 2.429363  |
| H | 0         | -2.41459  | -3.634872 | C | -1.435618 | -0.363577 | 3.824459  |
| C | -3.271447 | 2.404613  | -2.676203 | C | -1.463411 | -2.580106 | 2.883867  |
| C | -3.784103 | 3.262382  | 0.027924  | C | -3.378864 | -1.01106  | 2.53725   |
| C | -2.665812 | 3.550121  | -2.110794 | C | -2.686469 | -0.035048 | 3.28702   |
| C | -4.418792 | 1.991403  | -1.972189 | C | -0.748849 | -1.542561 | 3.532948  |
| C | -4.616249 | 2.358115  | -0.615264 | H | -0.895077 | 0.437683  | 4.301682  |
| C | -2.891141 | 3.962522  | -0.788385 | C | 3.440903  | 3.063648  | 1.403595  |
| C | 4.616249  | 2.358115  | -0.615264 | C | 2.279147  | 2.405117  | 3.832555  |
| C | 2.665812  | 3.550121  | -2.110794 | C | 3.750385  | 1.805026  | 2.015815  |
| C | 3.784103  | 3.262382  | 0.027924  | C | 2.454627  | 3.912884  | 1.948352  |
| C | 4.418792  | 1.991403  | -1.972189 | C | 2.020056  | 3.633018  | 3.262957  |
| C | 3.271447  | 2.404613  | -2.676203 | C | 2.996504  | 1.406191  | 3.132283  |
| C | 2.891141  | 3.962522  | -0.788385 | H | 1.36038   | 4.3304    | 3.77287   |
| C | 4.374404  | -2.794909 | 0.584958  | H | 1.829522  | 2.172614  | 4.792656  |
| C | 2.639152  | -4.681904 | -0.360376 | C | -3.440903 | 3.063648  | 1.403595  |
| C | 3.388764  | -3.239164 | 1.476451  | C | -2.279147 | 2.405117  | 3.832555  |
| C | 4.310079  | -3.118582 | -0.787483 | C | -2.454626 | 3.912884  | 1.948352  |
| C | 3.229237  | -3.844747 | -1.322366 | C | -3.750385 | 1.805026  | 2.015815  |
| C | 2.662634  | -4.329565 | 1.025072  | C | -2.996504 | 1.406191  | 3.132283  |
| C | -2.639152 | -4.681904 | -0.360376 | C | -2.020056 | 3.633018  | 3.262957  |
| C | -4.374404 | -2.794909 | 0.584958  | H | -1.36038  | 4.3304    | 3.77287   |
| C | -2.662634 | -4.329565 | 1.025072  | H | -1.829522 | 2.172614  | 4.792656  |
| C | -3.229238 | -3.844747 | -1.322366 | C | -0.731284 | -3.760346 | 2.426857  |
| C | -4.310079 | -3.118582 | -0.787483 | C | -1.387677 | -4.672158 | 1.597844  |
| C | -3.388764 | -3.239164 | 1.476451  | C | -4.982859 | -1.494327 | 0.722918  |
| C | -4.956141 | 0.682647  | -2.149605 | C | -4.452122 | -0.579651 | 1.629886  |
| C | -4.897365 | -2.031853 | -1.506507 | C | 1.387677  | -4.672158 | 1.597844  |
| C | -5.450454 | -1.099992 | -0.570604 | C | 0.731284  | -3.760346 | 2.426857  |
| C | -5.493086 | 0.236126  | -0.898168 | C | 4.982859  | -1.494327 | 0.722918  |
| C | 4.897365  | -2.031853 | -1.506507 | C | 4.452122  | -0.579651 | 1.629886  |

|   |          |          |           |   |           |          |           |
|---|----------|----------|-----------|---|-----------|----------|-----------|
| C | 1.732539 | 4.653242 | -0.274844 | C | -5.136566 | 1.204842 | 0.086717  |
| C | 1.657657 | 4.767651 | 1.088692  | C | -4.571533 | 0.832596 | 1.309268  |
| H | 0.871059 | 5.326757 | 1.573754  | C | -1.657657 | 4.767651 | 1.088692  |
| C | 4.571533 | 0.832596 | 1.309268  | H | -0.871059 | 5.326758 | 1.573754  |
| C | 5.136566 | 1.204842 | 0.086717  | C | -1.732539 | 4.653242 | -0.274844 |

### Intermediate 23a

|   |           |           |           |   |           |           |           |
|---|-----------|-----------|-----------|---|-----------|-----------|-----------|
| C | -2.783616 | -2.475903 | -2.829528 | C | -4.443853 | -2.635581 | -0.931047 |
| C | 2.076499  | 2.453883  | -3.272001 | C | -3.323503 | -3.381537 | 1.110978  |
| C | -2.783616 | 2.475903  | -2.829528 | C | -2.831418 | -4.31116  | -1.104029 |
| C | -3.309223 | 1.147969  | -3.030451 | C | -3.473288 | -3.24294  | -1.750496 |
| C | -4.490779 | 0.708841  | -2.370251 | C | -4.340983 | -2.666984 | 0.481873  |
| C | -4.490779 | -0.708841 | -2.370251 | C | -4.443853 | 2.635581  | -0.931047 |
| C | -3.309223 | -1.147969 | -3.030451 | C | -2.723137 | 4.35726   | 0.317572  |
| N | -2.664459 | 0         | -3.453137 | C | -4.340983 | 2.666984  | 0.481873  |
| C | 2.539634  | 1.150939  | -3.559334 | C | -3.473288 | 3.24294   | -1.750496 |
| C | 3.821456  | 0.706908  | -3.094529 | C | -2.831418 | 4.31116   | -1.104029 |
| C | 3.821456  | -0.706908 | -3.094529 | C | -3.323503 | 3.381537  | 1.110978  |
| C | 2.539634  | -1.150939 | -3.559334 | C | 1.124249  | 4.870263  | -1.906157 |
| N | 1.845866  | 0         | -3.935957 | C | -1.65197  | 4.887149  | -1.649919 |
| C | 0.698503  | -2.926096 | -3.408576 | C | -0.841722 | 5.370631  | -0.575001 |
| C | 0.349894  | -4.228446 | -2.841949 | C | 0.527267  | 5.37714   | -0.703387 |
| C | -1.056677 | -4.23092  | -2.713651 | C | -1.65197  | -4.887149 | -1.649919 |
| C | -1.506341 | -2.954016 | -3.213918 | C | 1.124249  | -4.870263 | -1.906157 |
| N | -0.407934 | -2.207214 | -3.662207 | C | 0.527267  | -5.37714  | -0.703387 |
| C | 0.698503  | 2.926096  | -3.408576 | C | -0.841722 | -5.370631 | -0.575001 |
| C | 0.349894  | 4.228446  | -2.841949 | C | 4.525557  | 1.38842   | -2.116179 |
| C | -1.056677 | 4.23092   | -2.713651 | C | 4.525557  | -1.38842  | -2.116179 |
| C | -1.506341 | 2.954016  | -3.213918 | C | 5.045092  | -0.678373 | -0.981677 |
| N | -0.407934 | 2.207214  | -3.662207 | C | 5.045092  | 0.678373  | -0.981677 |
| C | 2.076499  | -2.453883 | -3.272001 | C | -5.045958 | 1.395625  | -1.291534 |
| H | 0.847834  | 0         | -4.114957 | C | -5.394355 | 0.691199  | -0.114277 |
| H | -1.716302 | 0         | -3.816578 | C | -5.045958 | -1.395625 | -1.291534 |
| C | 2.925963  | 3.219762  | -2.326053 | C | -5.394355 | -0.691199 | -0.114277 |
| C | 3.283108  | 3.391372  | 0.501936  | C | -2.595262 | -2.78074  | 2.207678  |
| C | 4.027419  | 2.626878  | -1.680072 | C | -0.971647 | -1.405907 | 3.973425  |
| C | 2.396324  | 4.298502  | -1.586634 | C | -1.289261 | -3.291403 | 2.500949  |
| C | 2.535103  | 4.350275  | -0.190094 | C | -2.974609 | -1.45963  | 2.634434  |
| C | 4.167148  | 2.654709  | -0.253312 | C | -2.1064   | -0.747819 | 3.493136  |
| C | 2.535103  | -4.350275 | -0.190094 | C | -0.473806 | -2.577713 | 3.405834  |
| C | 4.027419  | -2.626878 | -1.680072 | H | -0.295116 | -0.869971 | 4.617501  |
| C | 3.283108  | -3.391372 | 0.501936  | C | -2.595262 | 2.78074   | 2.207678  |
| C | 2.396324  | -4.298502 | -1.586634 | C | -0.971647 | 1.405907  | 3.973425  |
| C | 2.925963  | -3.219762 | -2.326053 | C | -2.974609 | 1.45963   | 2.634434  |
| C | 4.167148  | -2.654709 | -0.253312 | C | -1.289261 | 3.291403  | 2.500949  |
| C | -2.723137 | -4.35726  | 0.317572  | C | -0.473806 | 2.577713  | 3.405834  |

|   |           |           |          |   |           |           |          |
|---|-----------|-----------|----------|---|-----------|-----------|----------|
| C | -2.1064   | 0.747819  | 3.493136 | C | -4.796065 | 1.392395  | 0.984477 |
| H | -0.295116 | 0.869971  | 4.617501 | C | -1.430104 | 4.900154  | 0.642751 |
| C | 2.829137  | -2.860354 | 1.748553 | C | -0.670485 | 4.30953   | 1.652849 |
| C | 1.874829  | -1.925268 | 4.147442 | C | -4.796065 | -1.392395 | 0.984477 |
| C | 1.580644  | -3.355509 | 2.267542 | C | -4.056961 | -0.733783 | 1.962591 |
| C | 3.427465  | -1.672958 | 2.27642  | C | -1.430104 | -4.900154 | 0.642751 |
| C | 3.053495  | -1.441522 | 3.62135  | C | -0.670485 | -4.30953  | 1.652849 |
| C | 0.999498  | -2.705911 | 3.360934 | C | 4.680512  | -1.380572 | 0.211    |
| H | 1.591857  | -1.621833 | 5.150984 | C | 4.241009  | -0.764319 | 1.399072 |
| C | 2.829137  | 2.860354  | 1.748553 | C | 0.776722  | -4.312865 | 1.507069 |
| C | 1.874829  | 1.925268  | 4.147442 | C | 1.329232  | -4.90905  | 0.377734 |
| C | 3.427465  | 1.672958  | 2.27642  | C | 1.329232  | 4.90905   | 0.377734 |
| C | 1.580644  | 3.355509  | 2.267542 | C | 0.776722  | 4.312865  | 1.507069 |
| C | 0.999498  | 2.705911  | 3.360934 | C | 4.241009  | 0.764319  | 1.399072 |
| C | 3.053495  | 1.441522  | 3.62135  | C | 4.680512  | 1.380572  | 0.211    |
| H | 1.591857  | 1.621833  | 5.150984 | H | 3.700387  | -0.865469 | 4.260494 |
| C | -4.056961 | 0.733783  | 1.962591 | H | 3.700387  | 0.865469  | 4.260494 |

### Product 24

|   |           |           |           |   |           |           |           |
|---|-----------|-----------|-----------|---|-----------|-----------|-----------|
| C | -2.43883  | -2.463332 | -2.960786 | C | 3.351323  | 3.352905  | 0.918324  |
| C | 2.43883   | 2.463332  | -2.960786 | C | 4.275131  | 2.63418   | -1.234537 |
| C | -2.438831 | 2.463333  | -2.960786 | C | 2.626836  | 4.284556  | -1.228053 |
| C | -2.932241 | 1.150059  | -3.212004 | C | 2.651295  | 4.31541   | 0.18895   |
| C | -4.178774 | 0.708379  | -2.666998 | C | 4.310746  | 2.657225  | 0.189745  |
| C | -4.178774 | -0.708379 | -2.666998 | C | 2.651295  | -4.31541  | 0.18895   |
| C | -2.932241 | -1.150059 | -3.212004 | C | 4.275131  | -2.63418  | -1.234537 |
| N | -2.258031 | 0         | -3.602375 | C | 3.351323  | -3.352905 | 0.918324  |
| C | 2.932241  | 1.150059  | -3.212004 | C | 2.626837  | -4.284556 | -1.228053 |
| C | 4.178774  | 0.708379  | -2.666998 | C | 3.217817  | -3.228211 | -1.946082 |
| C | 4.178774  | -0.708379 | -2.666998 | C | 4.310746  | -2.657225 | 0.189745  |
| C | 2.932241  | -1.150059 | -3.212004 | C | -2.651295 | -4.31541  | 0.18895   |
| N | 2.258031  | 0         | -3.602375 | C | -4.275131 | -2.63418  | -1.234537 |
| C | 1.105362  | -2.93784  | -3.214092 | C | -3.351323 | -3.352905 | 0.918324  |
| C | 0.705605  | -4.221548 | -2.665098 | C | -2.626837 | -4.284556 | -1.228053 |
| C | -0.705605 | -4.221548 | -2.665098 | C | -3.217817 | -3.228211 | -1.946082 |
| C | -1.105362 | -2.93784  | -3.214092 | C | -4.310746 | -2.657225 | 0.189745  |
| N | 0         | -2.209109 | -3.567709 | C | -4.275131 | 2.63418   | -1.234537 |
| C | 1.105362  | 2.93784   | -3.214092 | C | -2.651295 | 4.31541   | 0.18895   |
| C | 0.705605  | 4.221548  | -2.665098 | C | -4.310746 | 2.657225  | 0.189745  |
| C | -0.705605 | 4.221548  | -2.665098 | C | -3.217817 | 3.228211  | -1.946082 |
| C | -1.105362 | 2.93784   | -3.214092 | C | -2.626837 | 4.284556  | -1.228053 |
| N | 0         | 2.209109  | -3.567709 | C | -3.351323 | 3.352905  | 0.918324  |
| C | 2.438831  | -2.463333 | -2.960786 | C | 1.391508  | 4.855958  | -1.649973 |
| H | 1.278062  | 0         | -3.865552 | C | -1.391508 | 4.855958  | -1.649973 |
| H | -1.278062 | 0         | -3.865552 | C | -0.686943 | 5.329578  | -0.497956 |
| C | 3.217817  | 3.228211  | -1.946082 | C | 0.686943  | 5.329578  | -0.497956 |

|   |           |           |           |   |           |           |          |
|---|-----------|-----------|-----------|---|-----------|-----------|----------|
| C | -1.391508 | -4.855958 | -1.649973 | C | 1.450343  | -3.216243 | 2.491757 |
| C | 1.391508  | -4.855958 | -1.649973 | C | 3.21017   | -1.451206 | 2.488209 |
| C | 0.686943  | -5.329578 | -0.497956 | C | 2.482241  | -0.75097  | 3.475593 |
| C | -0.686943 | -5.329578 | -0.497956 | C | 0.750487  | -2.488855 | 3.476036 |
| C | 4.831973  | 1.397765  | -1.653196 | H | 0.888789  | -0.890681 | 4.864316 |
| C | 4.831973  | -1.397765 | -1.653196 | C | 2.7476    | 2.749828  | 2.08424  |
| C | 5.302677  | -0.687816 | -0.510241 | C | 1.402833  | 1.403927  | 4.072108 |
| C | 5.302677  | 0.687816  | -0.510241 | C | 3.21017   | 1.451206  | 2.488209 |
| C | -4.831973 | 1.397765  | -1.653196 | C | 1.450343  | 3.216243  | 2.491757 |
| C | -5.302677 | 0.687816  | -0.510241 | C | 0.750487  | 2.488855  | 3.476036 |
| C | -4.831973 | -1.397765 | -1.653196 | C | 2.482241  | 0.75097   | 3.475593 |
| C | -5.302677 | -0.687816 | -0.510241 | H | 0.888789  | 0.890681  | 4.864316 |
| C | -2.7476   | -2.749828 | 2.08424   | C | -4.213042 | 0.732122  | 1.704995 |
| C | -1.402833 | -1.403927 | 4.072108  | C | -4.829548 | 1.390989  | 0.643983 |
| C | -1.450343 | -3.216243 | 2.491757  | C | -1.38822  | 4.84185   | 0.648963 |
| C | -3.21017  | -1.451206 | 2.488209  | C | -0.729725 | 4.222688  | 1.709614 |
| C | -2.482241 | -0.75097  | 3.475593  | C | -4.829548 | -1.390989 | 0.643983 |
| C | -0.750487 | -2.488855 | 3.476036  | C | -4.213042 | -0.732122 | 1.704995 |
| H | -0.888789 | -0.890681 | 4.864316  | C | -1.38822  | -4.84185  | 0.648963 |
| C | -2.7476   | 2.749828  | 2.08424   | C | -0.729725 | -4.222688 | 1.709614 |
| C | -1.402833 | 1.403927  | 4.072108  | C | 4.829548  | -1.390989 | 0.643983 |
| C | -3.21017  | 1.451206  | 2.488209  | C | 4.213042  | -0.732122 | 1.704995 |
| C | -1.450343 | 3.216243  | 2.491757  | C | 0.729725  | -4.222688 | 1.709614 |
| C | -0.750487 | 2.488855  | 3.476036  | C | 1.38822   | -4.84185  | 0.648963 |
| C | -2.482241 | 0.75097   | 3.475593  | C | 1.38822   | 4.84185   | 0.648963 |
| H | -0.888789 | 0.890681  | 4.864316  | C | 0.729725  | 4.222688  | 1.709614 |
| C | 2.7476    | -2.749828 | 2.08424   | C | 4.213042  | 0.732122  | 1.704995 |
| C | 1.402833  | -1.403927 | 4.072108  | C | 4.829548  | 1.390989  | 0.643983 |

**(FP-Pb)**

|   |           |           |           |   |           |           |           |
|---|-----------|-----------|-----------|---|-----------|-----------|-----------|
| C | -2.441342 | 2.470475  | -2.993220 | C | -4.186998 | 0.723075  | -2.680381 |
| C | 2.475737  | -2.442080 | -2.987477 | C | -2.923964 | 1.143631  | -3.237404 |
| C | 2.476321  | 2.476960  | -3.015321 | N | -2.213075 | 0.008918  | -3.622306 |
| C | 1.147756  | 2.958825  | -3.270332 | C | 2.950061  | -1.106887 | -3.252033 |
| C | 0.727991  | 4.224833  | -2.714592 | C | 4.216394  | -0.691353 | -2.705354 |
| C | -0.688942 | 4.219117  | -2.706452 | C | 4.217494  | 0.724742  | -2.713476 |
| C | -1.102926 | 2.950795  | -3.253559 | C | 2.950397  | 1.142495  | -3.268399 |
| N | 0.016742  | 2.234021  | -3.646701 | N | 2.226736  | 0.011126  | -3.644638 |
| C | 1.149001  | -2.914865 | -3.226543 | C | -2.444368 | -2.442577 | -2.971013 |
| C | 0.727324  | -4.176928 | -2.673666 | C | 3.240838  | -3.229251 | -1.973178 |
| C | -0.685827 | -4.173434 | -2.665887 | C | 3.364619  | -3.369012 | 0.899723  |
| C | -1.105576 | -2.910553 | -3.211437 | C | 2.650137  | -4.297845 | -1.254082 |
| N | 0.015145  | -2.197127 | -3.605131 | C | 4.300772  | -2.633741 | -1.262784 |
| C | -2.924794 | -1.111841 | -3.222822 | C | 4.330970  | -2.663407 | 0.165997  |
| C | -4.186557 | -0.691184 | -2.673720 | C | 2.668253  | -4.340765 | 0.174489  |

|   |           |           |           |    |           |           |           |
|---|-----------|-----------|-----------|----|-----------|-----------|-----------|
| C | -4.334448 | -2.664357 | 0.177235  | H  | -0.896757 | 0.893728  | 4.848350  |
| C | -2.628834 | -4.287371 | -1.250506 | C  | 2.743895  | 2.746006  | 2.037037  |
| C | -3.371451 | -3.373324 | 0.908720  | C  | 1.402916  | 1.404680  | 4.047128  |
| C | -4.287222 | -2.629549 | -1.249853 | C  | 1.439978  | 3.207713  | 2.443202  |
| C | -3.219750 | -3.219825 | -1.961164 | C  | 3.202694  | 1.440326  | 2.441094  |
| C | -2.664428 | -4.337862 | 0.176069  | C  | 2.473687  | 0.740168  | 3.435041  |
| C | -4.334093 | 2.665052  | 0.174728  | C  | 0.741504  | 2.480346  | 3.439412  |
| C | -2.631428 | 4.295400  | -1.264795 | H  | 0.897534  | 0.899557  | 4.850291  |
| C | -3.364465 | 3.363515  | 0.900335  | C  | -2.771040 | -2.772764 | 2.070761  |
| C | -4.293261 | 2.644496  | -1.254446 | C  | -1.415585 | -1.417384 | 4.055745  |
| C | -3.225581 | 3.233939  | -1.975472 | C  | -3.238507 | -1.464756 | 2.473466  |
| C | -2.660677 | 4.328350  | 0.163951  | C  | -1.465044 | -3.243711 | 2.474044  |
| C | 2.652801  | 4.310130  | -1.270418 | C  | -0.759359 | -2.503584 | 3.455964  |
| C | 4.330850  | 2.665837  | 0.160034  | C  | -2.497916 | -0.757467 | 3.456017  |
| C | 2.666250  | 4.334532  | 0.160621  | H  | -0.899788 | -0.902425 | 4.845739  |
| C | 3.247608  | 3.248613  | -1.990648 | C  | 2.744601  | -2.767324 | 2.051757  |
| C | 4.306513  | 2.651493  | -1.270595 | C  | 1.392753  | -1.414872 | 4.042855  |
| C | 3.360111  | 3.361862  | 0.888732  | C  | 1.440139  | -3.239454 | 2.461362  |
| C | 4.856761  | -1.394668 | -1.686689 | C  | 3.202459  | -1.459842 | 2.448610  |
| C | 4.862717  | 1.412790  | -1.691016 | C  | 2.469380  | -0.754977 | 3.435766  |
| C | 5.322579  | 0.692305  | -0.541872 | C  | 0.737019  | -2.502220 | 3.448143  |
| C | 5.324091  | -0.686949 | -0.537995 | H  | 0.879907  | -0.900712 | 4.834888  |
| C | -4.854650 | 1.409050  | -1.671072 | C  | 0.722784  | 4.207388  | 1.665961  |
| C | -4.849057 | -1.393650 | -1.669518 | C  | 1.392285  | 4.837951  | 0.607216  |
| C | -5.339359 | -0.689949 | -0.524198 | C  | 4.833292  | 1.391781  | 0.606414  |
| C | -5.337507 | 0.691935  | -0.526392 | C  | 4.200963  | 0.722059  | 1.663615  |
| C | 1.412977  | -4.855635 | -1.671976 | C  | -1.397241 | 4.842465  | 0.610449  |
| C | -1.390844 | -4.845258 | -1.669925 | C  | -0.739590 | 4.210175  | 1.672090  |
| C | -0.688519 | -5.341503 | -0.526499 | C  | -4.860436 | 1.396003  | 0.626098  |
| C | 0.693956  | -5.341389 | -0.529549 | C  | -4.240423 | 0.723977  | 1.691685  |
| C | 1.414740  | 4.868198  | -1.690543 | C  | -1.404621 | -4.873532 | 0.627402  |
| C | 0.692432  | 5.326190  | -0.541532 | C  | -0.744652 | -4.251486 | 1.695786  |
| C | -1.394330 | 4.855624  | -1.688299 | C  | -4.245296 | -0.744446 | 1.696188  |
| C | -0.687033 | 5.325221  | -0.539085 | C  | -4.869119 | -1.405128 | 0.628720  |
| C | -2.763093 | 2.749178  | 2.056286  | C  | 4.840757  | -1.398006 | 0.611390  |
| C | -1.411361 | 1.402158  | 4.053076  | C  | 4.203544  | -0.740583 | 1.669567  |
| C | -3.231768 | 1.443344  | 2.465267  | C  | 0.723413  | -4.248624 | 1.689209  |
| C | -1.457479 | 3.211755  | 2.456018  | C  | 1.397434  | -4.867010 | 0.623578  |
| C | -0.752857 | 2.480781  | 3.445173  | Pb | -0.062513 | -0.062098 | -4.715962 |
| C | -2.494252 | 0.741460  | 3.453437  |    |           |           |           |

### **Pb@(FP)**

|   |           |           |           |   |           |           |           |
|---|-----------|-----------|-----------|---|-----------|-----------|-----------|
| C | 2.461404  | -2.468263 | -2.928826 | C | 0.729120  | -4.203510 | -2.622481 |
| C | -2.457880 | 2.516971  | -2.912330 | C | 1.200105  | -3.010635 | -3.235614 |
| C | -2.441933 | -2.463149 | -2.907558 | N | 0.003375  | -2.267366 | -3.718146 |
| C | -1.176907 | -3.006724 | -3.216395 | C | -1.179754 | 3.035002  | -3.205130 |
| C | -0.700530 | -4.199141 | -2.611048 | C | -0.707000 | 4.240632  | -2.618743 |

|   |           |           |           |   |           |           |           |
|---|-----------|-----------|-----------|---|-----------|-----------|-----------|
| C | 0.721423  | 4.240880  | -2.629302 | C | -0.687506 | 5.335717  | -0.441186 |
| C | 1.185174  | 3.032579  | -3.223383 | C | -1.396560 | -4.869830 | -1.605747 |
| N | -0.006207 | 2.269869  | -3.649358 | C | -0.682338 | -5.336281 | -0.444401 |
| C | 2.930420  | 1.151576  | -3.192933 | C | 1.415803  | -4.881434 | -1.617397 |
| C | 4.193385  | 0.733300  | -2.660756 | C | 0.693900  | -5.335817 | -0.451699 |
| C | 4.193430  | -0.690767 | -2.659505 | C | 2.753329  | -2.772090 | 2.117767  |
| C | 2.939634  | -1.107021 | -3.193282 | C | 1.421068  | -1.417469 | 4.122709  |
| N | 2.181731  | 0.022299  | -3.519108 | C | 3.212438  | -1.461800 | 2.507546  |
| C | -2.936832 | 1.160136  | -3.175587 | C | 1.452244  | -3.243412 | 2.538878  |
| C | -4.181460 | 0.732414  | -2.617086 | C | 0.755694  | -2.501039 | 3.529316  |
| C | -4.177118 | -0.689817 | -2.616645 | C | 2.491624  | -0.757831 | 3.503713  |
| C | -2.938630 | -1.108433 | -3.177851 | H | 0.919439  | -0.905377 | 4.924369  |
| N | -2.204992 | 0.028715  | -3.541814 | C | -2.753852 | -2.776517 | 2.145167  |
| C | 2.458377  | 2.511013  | -2.932802 | C | -1.399834 | -1.412399 | 4.125369  |
| C | -3.236694 | 3.270835  | -1.890080 | C | -1.448090 | -3.247454 | 2.554452  |
| C | -3.358755 | 3.372992  | 0.980457  | C | -3.222676 | -1.467534 | 2.541041  |
| C | -2.635418 | 4.329048  | -1.179828 | C | -2.487834 | -0.760453 | 3.525735  |
| C | -4.287549 | 2.654859  | -1.167393 | C | -0.740641 | -2.500462 | 3.533769  |
| C | -4.332175 | 2.675283  | 0.252660  | H | -0.882446 | -0.892696 | 4.911236  |
| C | -2.658467 | 4.348027  | 0.258922  | C | 2.744383  | 2.750501  | 2.105141  |
| C | 4.328329  | 2.677415  | 0.221183  | C | 1.410868  | 1.395253  | 4.109917  |
| C | 2.644292  | 4.337337  | -1.197693 | C | 3.205373  | 1.440444  | 2.497684  |
| C | 3.356863  | 3.372116  | 0.956291  | C | 1.443946  | 3.210767  | 2.521619  |
| C | 4.290196  | 2.660447  | -1.200821 | C | 0.746597  | 2.472522  | 3.513007  |
| C | 3.239077  | 3.277246  | -1.917063 | C | 2.486400  | 0.738336  | 3.495346  |
| C | 2.662149  | 4.352476  | 0.242971  | H | 0.905647  | 0.881674  | 4.907547  |
| C | 4.331574  | -2.670617 | 0.221966  | C | -2.756898 | 2.751499  | 2.132642  |
| C | 2.639292  | -4.311447 | -1.196709 | C | -1.409692 | 1.395883  | 4.123173  |
| C | 3.363388  | -3.373446 | 0.957392  | C | -1.452574 | 3.211287  | 2.535529  |
| C | 4.282409  | -2.629259 | -1.201222 | C | -3.224912 | 1.441482  | 2.531972  |
| C | 3.231689  | -3.243770 | -1.911352 | C | -2.492388 | 0.738079  | 3.520019  |
| C | 2.663910  | -4.349838 | 0.243124  | C | -0.747751 | 2.471818  | 3.519783  |
| C | -2.615325 | -4.296040 | -1.179683 | H | -0.898648 | 0.883329  | 4.917781  |
| C | -4.325755 | -2.672194 | 0.251371  | C | -0.726635 | -4.259390 | 1.788340  |
| C | -2.647557 | -4.344051 | 0.258154  | C | -1.393986 | -4.873706 | 0.706497  |
| C | -3.212379 | -3.229458 | -1.885132 | C | -4.854910 | -1.406479 | 0.693199  |
| C | -4.267653 | -2.623254 | -1.169877 | C | -4.229991 | -0.746996 | 1.757522  |
| C | -3.354769 | -3.376433 | 0.980930  | C | 1.401255  | -4.866973 | 0.695334  |
| C | -4.851125 | 1.414332  | -1.596338 | C | 0.728071  | -4.255642 | 1.778910  |
| C | -4.844361 | -1.391800 | -1.600349 | C | 4.836640  | -1.397741 | 0.655211  |
| C | -5.329888 | -0.693564 | -0.464322 | C | 4.203513  | -0.740554 | 1.714109  |
| C | -5.333233 | 0.697991  | -0.462804 | C | 1.392075  | 4.847912  | 0.693942  |
| C | 4.849427  | -1.393611 | -1.637547 | C | 0.721903  | 4.217263  | 1.760792  |
| C | 4.849528  | 1.418322  | -1.635300 | C | 4.199228  | 0.722813  | 1.708648  |
| C | 5.317760  | 0.699409  | -0.499158 | C | 4.830221  | 1.392929  | 0.652960  |
| C | 5.317753  | -0.689344 | -0.499805 | C | -4.854823 | 1.395729  | 0.692536  |
| C | -1.407750 | 4.892284  | -1.602386 | C | -4.229737 | 0.722699  | 1.752134  |
| C | 1.413664  | 4.898468  | -1.613656 | C | -0.732704 | 4.218709  | 1.768889  |
| C | 0.687607  | 5.333670  | -0.448512 | C | -1.396135 | 4.853684  | 0.704134  |



|    |           |           |           |   |           |           |           |
|----|-----------|-----------|-----------|---|-----------|-----------|-----------|
| Pb | -0.087005 | -0.127670 | -2.513212 | H | -0.015011 | -2.121752 | -4.730911 |
| H  | -0.024459 | 1.991476  | -4.633540 |   |           |           |           |

### Pb@(FP-Pb)

---

|   |           |           |           |   |           |           |           |
|---|-----------|-----------|-----------|---|-----------|-----------|-----------|
| C | -2.403836 | 2.471590  | -2.949670 | C | 4.335510  | 2.671976  | 0.184633  |
| C | 2.477134  | -2.405321 | -2.944088 | C | 2.669410  | 4.342593  | 0.185031  |
| C | 2.508653  | 2.512874  | -2.994424 | C | 3.277699  | 3.282321  | -1.968892 |
| C | 1.180509  | 2.979697  | -3.249919 | C | 4.328077  | 2.673290  | -1.248771 |
| C | 0.745602  | 4.245108  | -2.701706 | C | 3.361784  | 3.366621  | 0.911979  |
| C | -0.666641 | 4.231710  | -2.701240 | C | 4.864580  | -1.380086 | -1.670465 |
| C | -1.068357 | 2.961607  | -3.225284 | C | 4.868694  | 1.430055  | -1.667700 |
| N | 0.057594  | 2.232569  | -3.616186 | C | 5.320155  | 0.701309  | -0.517000 |
| C | 1.151026  | -2.872419 | -3.183039 | C | 5.323459  | -0.676364 | -0.520867 |
| C | 0.731758  | -4.137976 | -2.678179 | C | -4.826053 | 1.426824  | -1.676374 |
| C | -0.689716 | -4.184701 | -2.702469 | C | -4.870624 | -1.411027 | -1.686296 |
| C | -1.152946 | -2.982359 | -3.277864 | C | -5.292866 | -0.683936 | -0.526658 |
| N | -0.002919 | -2.113996 | -3.562967 | C | -5.291057 | 0.696448  | -0.520003 |
| C | -2.990487 | -1.159380 | -3.285229 | C | 1.435470  | -4.828635 | -1.677787 |
| C | -4.192565 | -0.697730 | -2.708915 | C | -1.404382 | -4.870815 | -1.687675 |
| C | -4.144611 | 0.724176  | -2.683625 | C | -0.677287 | -5.295674 | -0.527471 |
| C | -2.877223 | 1.143374  | -3.191406 | C | 0.702823  | -5.294000 | -0.521877 |
| N | -2.124676 | -0.009905 | -3.572648 | C | 1.428530  | 4.878682  | -1.667008 |
| C | 2.960101  | -1.071630 | -3.223831 | C | 0.698067  | 5.328122  | -0.516617 |
| C | 4.225789  | -0.666641 | -2.700549 | C | -1.382232 | 4.864764  | -1.672305 |
| C | 4.232635  | 0.745208  | -2.700254 | C | -0.679918 | 5.327581  | -0.521855 |
| C | 2.966432  | 1.177750  | -3.247564 | C | -2.756580 | 2.751389  | 2.073088  |
| N | 2.221943  | 0.053035  | -3.613450 | C | -1.408295 | 1.414247  | 4.085244  |
| C | -2.496905 | -2.498238 | -2.984663 | C | -3.227940 | 1.444082  | 2.487667  |
| C | 3.249362  | -3.204600 | -1.956310 | C | -1.453738 | 3.214718  | 2.474881  |
| C | 3.365560  | -3.357787 | 0.913331  | C | -0.749093 | 2.487200  | 3.472962  |
| C | 2.656489  | -4.285126 | -1.255395 | C | -2.486558 | 0.744614  | 3.482116  |
| C | 4.313273  | -2.611937 | -1.248851 | H | -0.897630 | 0.910276  | 4.886471  |
| C | 4.344274  | -2.654877 | 0.188305  | C | 2.743863  | 2.748972  | 2.058885  |
| C | 2.664978  | -4.328358 | 0.191009  | C | 1.404861  | 1.408922  | 4.071713  |
| C | -4.338821 | -2.655939 | 0.199741  | C | 1.441431  | 3.213243  | 2.466376  |
| C | -2.629141 | -4.319619 | -1.251942 | C | 3.205937  | 1.444535  | 2.464788  |
| C | -3.351963 | -3.357330 | 0.913084  | C | 2.475541  | 0.743189  | 3.460090  |
| C | -4.315458 | -2.634035 | -1.250337 | C | 0.742051  | 2.484209  | 3.464011  |
| C | -3.267800 | -3.271936 | -1.955015 | H | 0.899025  | 0.903010  | 4.874055  |
| C | -2.650732 | -4.344838 | 0.198554  | C | -2.750017 | -2.754633 | 2.076821  |
| C | -4.322493 | 2.659350  | 0.189214  | C | -1.402837 | -1.404706 | 4.080928  |
| C | -2.612639 | 4.307489  | -1.251407 | C | -3.223104 | -1.448405 | 2.489290  |
| C | -3.355404 | 3.362650  | 0.912573  | C | -1.445856 | -3.230408 | 2.491236  |
| C | -4.281109 | 2.648788  | -1.256101 | C | -0.744472 | -2.492441 | 3.486938  |
| C | -3.202460 | 3.241720  | -1.959621 | C | -2.486367 | -0.744304 | 3.486067  |
| C | -2.654735 | 4.340170  | 0.184411  | H | -0.891523 | -0.893131 | 4.876860  |
| C | 2.671177  | 4.335377  | -1.248376 | C | 2.747851  | -2.758811 | 2.069731  |

|   |           |           |          |    |           |           |           |
|---|-----------|-----------|----------|----|-----------|-----------|-----------|
| C | 1.405073  | -1.409641 | 4.076543 | C  | -4.847173 | 1.402164  | 0.636121  |
| C | 1.442670  | -3.234845 | 2.485619 | C  | -4.229802 | 0.725236  | 1.720529  |
| C | 3.205033  | -1.453136 | 2.468368 | C  | -1.396516 | -4.844071 | 0.634553  |
| C | 2.474941  | -0.748468 | 3.464836 | C  | -0.727744 | -4.235475 | 1.724938  |
| C | 0.741305  | -2.493604 | 3.478612 | C  | -4.227539 | -0.731538 | 1.722865  |
| H | 0.896547  | -0.899424 | 4.874551 | C  | -4.838382 | -1.401653 | 0.635258  |
| C | 0.726634  | 4.211843  | 1.690295 | C  | 4.844109  | -1.395025 | 0.633971  |
| C | 1.397433  | 4.848128  | 0.633947 | C  | 4.205722  | -0.736032 | 1.693263  |
| C | 4.840513  | 1.400431  | 0.633228 | C  | 0.727455  | -4.238341 | 1.720946  |
| C | 4.203385  | 0.729025  | 1.688813 | C  | 1.407792  | -4.852731 | 0.635205  |
| C | -1.397189 | 4.846949  | 0.632238 | Pb | 0.047162  | 0.026942  | -4.853394 |
| C | -0.738340 | 4.213424  | 1.694511 | Pb | -1.020130 | -1.013539 | -1.649748 |

**(FP-Zn)**

---

|   |           |           |           |   |           |           |           |
|---|-----------|-----------|-----------|---|-----------|-----------|-----------|
| C | -2.439522 | 2.439702  | -2.967508 | C | -4.286254 | -2.635461 | -1.275129 |
| C | 2.439522  | -2.439702 | -2.967508 | C | -3.228351 | -3.228380 | -1.984026 |
| C | 2.439522  | 2.439702  | -2.967508 | C | -2.659081 | -4.320569 | 0.145210  |
| C | 1.113952  | 2.889076  | -3.206454 | C | -4.320427 | 2.659014  | 0.144958  |
| C | 0.704004  | 4.173102  | -2.701780 | C | -2.635500 | 4.286416  | -1.274867 |
| C | -0.704004 | 4.173102  | -2.701780 | C | -3.357709 | 3.357732  | 0.872945  |
| C | -1.113952 | 2.889076  | -3.206454 | C | -4.286254 | 2.635461  | -1.275129 |
| N | -0.000000 | 2.125938  | -3.518093 | C | -3.228350 | 3.228379  | -1.984026 |
| C | 1.113952  | -2.889076 | -3.206454 | C | -2.659081 | 4.320569  | 0.145211  |
| C | 0.704004  | -4.173102 | -2.701780 | C | 2.635500  | 4.286417  | -1.274868 |
| C | -0.704004 | -4.173102 | -2.701780 | C | 4.320427  | 2.659014  | 0.144958  |
| C | -1.113952 | -2.889076 | -3.206454 | C | 2.659081  | 4.320569  | 0.145210  |
| N | -0.000000 | -2.125938 | -3.518093 | C | 3.228351  | 3.228380  | -1.984026 |
| C | -2.888802 | -1.114001 | -3.207056 | C | 4.286254  | 2.635461  | -1.275129 |
| C | -4.173020 | -0.704026 | -2.702606 | C | 3.357709  | 3.357732  | 0.872945  |
| C | -4.173020 | 0.704025  | -2.702606 | C | 4.837280  | -1.394993 | -1.699909 |
| C | -2.888802 | 1.114001  | -3.207056 | C | 4.837280  | 1.394993  | -1.699909 |
| N | -2.126118 | -0.000000 | -3.521360 | C | 5.314764  | 0.687542  | -0.555656 |
| C | 2.888802  | -1.114001 | -3.207056 | C | 5.314764  | -0.687542 | -0.555656 |
| C | 4.173020  | -0.704026 | -2.702606 | C | -4.837280 | 1.394993  | -1.699909 |
| C | 4.173020  | 0.704025  | -2.702606 | C | -4.837280 | -1.394993 | -1.699909 |
| C | 2.888802  | 1.114001  | -3.207056 | C | -5.314764 | -0.687542 | -0.555657 |
| N | 2.126117  | -0.000000 | -3.521359 | C | -5.314764 | 0.687542  | -0.555657 |
| C | -2.439522 | -2.439702 | -2.967508 | C | 1.394977  | -4.837492 | -1.699434 |
| C | 3.228351  | -3.228380 | -1.984026 | C | -1.394977 | -4.837492 | -1.699434 |
| C | 3.357709  | -3.357732 | 0.872945  | C | -0.687574 | -5.315025 | -0.555187 |
| C | 2.635500  | -4.286417 | -1.274868 | C | 0.687574  | -5.315025 | -0.555187 |
| C | 4.286254  | -2.635461 | -1.275129 | C | 1.394977  | 4.837492  | -1.699434 |
| C | 4.320427  | -2.659014 | 0.144958  | C | 0.687574  | 5.315025  | -0.555187 |
| C | 2.659081  | -4.320569 | 0.145210  | C | -1.394977 | 4.837491  | -1.699434 |
| C | -4.320427 | -2.659014 | 0.144958  | C | -0.687574 | 5.315025  | -0.555187 |
| C | -2.635500 | -4.286417 | -1.274868 | C | -2.750736 | 2.750638  | 2.035303  |
| C | -3.357709 | -3.357732 | 0.872945  | C | -1.403261 | 1.403270  | 4.020264  |

|   |           |           |          |    |           |           |           |
|---|-----------|-----------|----------|----|-----------|-----------|-----------|
| C | -3.214339 | 1.451584  | 2.439560 | C  | 3.214339  | -1.451584 | 2.439561  |
| C | -1.451598 | 3.214253  | 2.439755 | C  | 2.485727  | -0.750886 | 3.424054  |
| C | -0.750853 | 2.485688  | 3.424224 | C  | 0.750854  | -2.485687 | 3.424223  |
| C | -2.485726 | 0.750886  | 3.424054 | H  | 0.889535  | -0.889504 | 4.812308  |
| H | -0.889535 | 0.889504  | 4.812308 | C  | 0.731446  | 4.219318  | 1.657272  |
| C | 2.750736  | 2.750638  | 2.035303 | C  | 1.390647  | 4.838764  | 0.598389  |
| C | 1.403261  | 1.403270  | 4.020264 | C  | 4.838625  | 1.390596  | 0.598012  |
| C | 1.451598  | 3.214253  | 2.439755 | C  | 4.219285  | 0.731432  | 1.656973  |
| C | 3.214339  | 1.451584  | 2.439561 | C  | -1.390647 | 4.838764  | 0.598389  |
| C | 2.485727  | 0.750886  | 3.424054 | C  | -0.731446 | 4.219318  | 1.657272  |
| C | 0.750853  | 2.485688  | 3.424224 | C  | -4.838626 | 1.390596  | 0.598012  |
| H | 0.889535  | 0.889504  | 4.812308 | C  | -4.219285 | 0.731432  | 1.656973  |
| C | -2.750736 | -2.750638 | 2.035303 | C  | -1.390647 | -4.838764 | 0.598389  |
| C | -1.403261 | -1.403270 | 4.020263 | C  | -0.731446 | -4.219318 | 1.657272  |
| C | -3.214339 | -1.451584 | 2.439560 | C  | -4.219285 | -0.731432 | 1.656973  |
| C | -1.451598 | -3.214253 | 2.439755 | C  | -4.838625 | -1.390596 | 0.598012  |
| C | -0.750853 | -2.485687 | 3.424223 | C  | 4.838625  | -1.390596 | 0.598012  |
| C | -2.485726 | -0.750886 | 3.424054 | C  | 4.219285  | -0.731432 | 1.656974  |
| H | -0.889534 | -0.889503 | 4.812307 | C  | 0.731446  | -4.219318 | 1.657272  |
| C | 2.750736  | -2.750638 | 2.035303 | C  | 1.390647  | -4.838764 | 0.598389  |
| C | 1.403262  | -1.403270 | 4.020264 | Zn | -0.000000 | -0.000000 | -3.679554 |
| C | 1.451598  | -3.214253 | 2.439755 |    |           |           |           |

### Zn@(FP)

|   |           |           |           |   |           |           |           |
|---|-----------|-----------|-----------|---|-----------|-----------|-----------|
| C | 2.438896  | 2.461628  | -2.953517 | C | -2.438910 | 2.461628  | -2.953513 |
| C | -2.438910 | -2.461628 | -2.953513 | C | -3.218827 | -3.228156 | -1.941207 |
| C | 2.438896  | -2.461629 | -2.953517 | C | -3.351523 | -3.352788 | 0.921306  |
| C | 2.932431  | -1.149555 | -3.205795 | C | -4.276438 | -2.634304 | -1.230315 |
| C | 4.179029  | -0.708183 | -2.662007 | C | -2.627354 | -4.284620 | -1.224242 |
| C | 4.179029  | 0.708183  | -2.662007 | C | -2.651700 | -4.315696 | 0.192420  |
| C | 2.932431  | 1.149555  | -3.205795 | C | -4.311799 | -2.657452 | 0.193583  |
| N | 2.257562  | 0.000000  | -3.596146 | C | -2.651700 | 4.315696  | 0.192420  |
| C | -2.932453 | -1.149558 | -3.205793 | C | -4.276438 | 2.634304  | -1.230315 |
| C | -4.179054 | -0.708184 | -2.662012 | C | -3.351523 | 3.352788  | 0.921306  |
| C | -4.179054 | 0.708184  | -2.662012 | C | -2.627354 | 4.284620  | -1.224242 |
| C | -2.932453 | 1.149558  | -3.205793 | C | -3.218827 | 3.228156  | -1.941207 |
| N | -2.257571 | 0.000000  | -3.596107 | C | -4.311799 | 2.657452  | 0.193583  |
| C | -1.105173 | 2.933631  | -3.204916 | C | 2.651685  | 4.315695  | 0.192417  |
| C | -0.705389 | 4.218215  | -2.660053 | C | 4.276424  | 2.634305  | -1.230317 |
| C | 0.705375  | 4.218217  | -2.660055 | C | 3.351508  | 3.352787  | 0.921304  |
| C | 1.105160  | 2.933635  | -3.204921 | C | 2.627339  | 4.284621  | -1.224244 |
| N | -0.000003 | 2.202371  | -3.555248 | C | 3.218813  | 3.228156  | -1.941210 |
| C | -1.105173 | -2.933631 | -3.204916 | C | 4.311784  | 2.657452  | 0.193581  |
| C | -0.705389 | -4.218215 | -2.660053 | C | 4.276424  | -2.634305 | -1.230317 |
| C | 0.705375  | -4.218217 | -2.660055 | C | 2.651685  | -4.315695 | 0.192417  |
| C | 1.105160  | -2.933635 | -3.204921 | C | 4.311784  | -2.657452 | 0.193581  |
| N | -0.000003 | -2.202371 | -3.555248 | C | 3.218813  | -3.228156 | -1.941210 |

|   |           |           |           |    |           |           |           |
|---|-----------|-----------|-----------|----|-----------|-----------|-----------|
| C | 2.627339  | -4.284621 | -1.224244 | C  | -1.402372 | 1.403512  | 4.074048  |
| C | 3.351508  | -3.352787 | 0.921304  | C  | -1.449799 | 3.214797  | 2.493124  |
| C | -1.391746 | -4.854807 | -1.646400 | C  | -3.209230 | 1.450647  | 2.489911  |
| C | 1.391731  | -4.854807 | -1.646401 | C  | -2.481208 | 0.750626  | 3.476888  |
| C | 0.686939  | -5.328977 | -0.495110 | C  | -0.750130 | 2.487731  | 3.477350  |
| C | -0.686953 | -5.328976 | -0.495110 | H  | -0.888712 | 0.890588  | 4.866661  |
| C | 1.391731  | 4.854807  | -1.646401 | C  | -2.746871 | -2.748841 | 2.085933  |
| C | -1.391746 | 4.854807  | -1.646400 | C  | -1.402372 | -1.403512 | 4.074049  |
| C | -0.686953 | 5.328976  | -0.495110 | C  | -3.209230 | -1.450648 | 2.489911  |
| C | 0.686939  | 5.328977  | -0.495110 | C  | -1.449799 | -3.214798 | 2.493124  |
| C | -4.832916 | -1.397816 | -1.648864 | C  | -0.750130 | -2.487731 | 3.477350  |
| C | -4.832916 | 1.397816  | -1.648864 | C  | -2.481208 | -0.750626 | 3.476888  |
| C | -5.303670 | 0.687841  | -0.506274 | H  | -0.888713 | -0.890589 | 4.866662  |
| C | -5.303670 | -0.687841 | -0.506274 | C  | 4.212294  | -0.731994 | 1.707397  |
| C | 4.832898  | -1.397815 | -1.648865 | C  | 4.830157  | -1.391090 | 0.647666  |
| C | 5.303653  | -0.687840 | -0.506275 | C  | 1.388295  | -4.841489 | 0.651839  |
| C | 4.832898  | 1.397815  | -1.648865 | C  | 0.729596  | -4.221139 | 1.711248  |
| C | 5.303653  | 0.687840  | -0.506275 | C  | 4.830157  | 1.391090  | 0.647665  |
| C | 2.746857  | 2.748840  | 2.085932  | C  | 4.212294  | 0.731994  | 1.707397  |
| C | 1.402359  | 1.403512  | 4.074048  | C  | 1.388295  | 4.841489  | 0.651839  |
| C | 1.449785  | 3.214797  | 2.493124  | C  | 0.729596  | 4.221139  | 1.711248  |
| C | 3.209217  | 1.450648  | 2.489911  | C  | -4.830174 | 1.391091  | 0.647667  |
| C | 2.481196  | 0.750626  | 3.476888  | C  | -4.212310 | 0.731994  | 1.707399  |
| C | 0.750117  | 2.487731  | 3.477349  | C  | -0.729609 | 4.221140  | 1.711249  |
| H | 0.888698  | 0.890589  | 4.866661  | C  | -1.388309 | 4.841490  | 0.651840  |
| C | 2.746856  | -2.748840 | 2.085932  | C  | -1.388309 | -4.841490 | 0.651840  |
| C | 1.402359  | -1.403511 | 4.074048  | C  | -0.729609 | -4.221140 | 1.711249  |
| C | 3.209217  | -1.450648 | 2.489911  | C  | -4.212310 | -0.731994 | 1.707398  |
| C | 1.449785  | -3.214797 | 2.493124  | C  | -4.830173 | -1.391091 | 0.647667  |
| C | 0.750117  | -2.487731 | 3.477349  | Zn | 0.000787  | -0.000001 | -0.412254 |
| C | 2.481195  | -0.750626 | 3.476888  | H  | -1.278918 | 0.000000  | -3.863757 |
| H | 0.888697  | -0.890588 | 4.866660  | H  | 1.278934  | 0.000000  | -3.863897 |
| C | -2.746870 | 2.748841  | 2.085933  |    |           |           |           |

### Zn@(FP-Zn)

|   |           |           |           |   |           |           |           |
|---|-----------|-----------|-----------|---|-----------|-----------|-----------|
| C | -2.438469 | 2.438388  | -2.961200 | N | 0.000027  | -2.129564 | -3.516574 |
| C | 2.438473  | -2.438389 | -2.961200 | C | -2.890134 | -1.113237 | -3.201785 |
| C | 2.438383  | 2.438465  | -2.961191 | C | -4.175202 | -0.704304 | -2.698058 |
| C | 1.113158  | 2.890168  | -3.201801 | C | -4.175215 | 0.704188  | -2.698061 |
| C | 0.704194  | 4.175227  | -2.698071 | C | -2.890155 | 1.113154  | -3.201787 |
| C | -0.704302 | 4.175212  | -2.698075 | N | -2.129577 | -0.000039 | -3.516596 |
| C | -1.113236 | 2.890144  | -3.201805 | C | 2.890170  | -1.113161 | -3.201801 |
| N | -0.000034 | 2.129616  | -3.516663 | C | 4.175226  | -0.704194 | -2.698071 |
| C | 1.113229  | -2.890124 | -3.201781 | C | 4.175205  | 0.704300  | -2.698065 |
| C | 0.704296  | -4.175194 | -2.698056 | C | 2.890135  | 1.113232  | -3.201794 |
| C | -0.704194 | -4.175214 | -2.698054 | N | 2.129605  | 0.000027  | -3.516642 |
| C | -1.113160 | -2.890157 | -3.201780 | C | -2.438394 | -2.438475 | -2.961194 |

|   |           |           |           |    |           |           |           |
|---|-----------|-----------|-----------|----|-----------|-----------|-----------|
| C | 3.227736  | -3.227644 | -1.978959 | C  | -1.451007 | 3.213210  | 2.441573  |
| C | 3.357425  | -3.357331 | 0.875758  | C  | -0.750615 | 2.484759  | 3.425987  |
| C | 2.635747  | -4.286828 | -1.271228 | C  | -2.484782 | 0.750548  | 3.425987  |
| C | 4.286896  | -2.635640 | -1.271228 | H  | -0.889116 | 0.889089  | 4.814554  |
| C | 4.320698  | -2.659000 | 0.148545  | C  | 2.749614  | 2.749684  | 2.037127  |
| C | 2.659109  | -4.320631 | 0.148544  | C  | 1.402446  | 1.402485  | 4.022210  |
| C | -4.320607 | -2.659090 | 0.148566  | C  | 1.450857  | 3.213198  | 2.441567  |
| C | -2.635633 | -4.286889 | -1.271209 | C  | 3.213161  | 1.450938  | 2.441566  |
| C | -3.357299 | -3.357396 | 0.875781  | C  | 2.484692  | 0.750505  | 3.425940  |
| C | -4.286819 | -2.635743 | -1.271209 | C  | 0.750442  | 2.484711  | 3.425942  |
| C | -3.227642 | -3.227735 | -1.978944 | H  | 0.888816  | 0.888837  | 4.814265  |
| C | -2.658980 | -4.320678 | 0.148568  | C  | -2.749616 | -2.749688 | 2.037125  |
| C | -4.320701 | 2.658997  | 0.148546  | C  | -1.402448 | -1.402490 | 4.022210  |
| C | -2.635747 | 4.286823  | -1.271228 | C  | -3.213163 | -1.450942 | 2.441564  |
| C | -3.357427 | 3.357326  | 0.875759  | C  | -1.450860 | -3.213203 | 2.441566  |
| C | -4.286895 | 2.635635  | -1.271228 | C  | -0.750445 | -2.484714 | 3.425940  |
| C | -3.227734 | 3.227639  | -1.978957 | C  | -2.484694 | -0.750511 | 3.425940  |
| C | -2.659109 | 4.320626  | 0.148544  | H  | -0.888819 | -0.888843 | 4.814266  |
| C | 2.635625  | 4.286877  | -1.271207 | C  | 2.749740  | -2.749672 | 2.037123  |
| C | 4.320601  | 2.659084  | 0.148567  | C  | 1.402671  | -1.402634 | 4.022371  |
| C | 2.658975  | 4.320671  | 0.148568  | C  | 1.451004  | -3.213214 | 2.441572  |
| C | 3.227629  | 3.227722  | -1.978938 | C  | 3.213250  | -1.450926 | 2.441573  |
| C | 4.286809  | 2.635734  | -1.271206 | C  | 2.484779  | -0.750552 | 3.425987  |
| C | 3.357295  | 3.357391  | 0.875781  | C  | 0.750613  | -2.484762 | 3.425986  |
| C | 4.839084  | -1.395414 | -1.695976 | H  | 0.889114  | -0.889095 | 4.814554  |
| C | 4.839038  | 1.395533  | -1.695965 | C  | 0.731050  | 4.218459  | 1.659563  |
| C | 5.315920  | 0.687697  | -0.551608 | C  | 1.390430  | 4.838602  | 0.601368  |
| C | 5.315948  | -0.687571 | -0.551617 | C  | 4.838565  | 1.390553  | 0.601368  |
| C | -4.839080 | 1.395409  | -1.695975 | C  | 4.218441  | 0.731156  | 1.659563  |
| C | -4.839044 | -1.395538 | -1.695965 | C  | -1.390576 | 4.838580  | 0.601353  |
| C | -5.315927 | -0.687702 | -0.551608 | C  | -0.731194 | 4.218454  | 1.659556  |
| C | -5.315949 | 0.687567  | -0.551616 | C  | -4.838625 | 1.390450  | 0.601356  |
| C | 1.395535  | -4.839044 | -1.695974 | C  | -4.218480 | 0.731084  | 1.659558  |
| C | -1.395413 | -4.839080 | -1.695964 | C  | -1.390434 | -4.838608 | 0.601370  |
| C | -0.687565 | -5.315946 | -0.551607 | C  | -0.731053 | -4.218466 | 1.659565  |
| C | 0.687704  | -5.315930 | -0.551616 | C  | -4.218443 | -0.731161 | 1.659562  |
| C | 1.395409  | 4.839076  | -1.695967 | C  | -4.838568 | -1.390557 | 0.601368  |
| C | 0.687562  | 5.315940  | -0.551610 | C  | 4.838621  | -1.390454 | 0.601355  |
| C | -1.395538 | 4.839046  | -1.695977 | C  | 4.218477  | -0.731088 | 1.659558  |
| C | -0.687706 | 5.315926  | -0.551617 | C  | 0.731192  | -4.218460 | 1.659557  |
| C | -2.749743 | 2.749668  | 2.037124  | C  | 1.390575  | -4.838587 | 0.601355  |
| C | -1.402672 | 1.402629  | 4.022371  | Zn | -0.000006 | -0.000012 | -3.526459 |
| C | -3.213253 | 1.450921  | 2.441574  | Zn | 0.000102  | 0.000165  | -0.511700 |

**(FP-Ge)**

|   |           |           |           |   |          |          |           |
|---|-----------|-----------|-----------|---|----------|----------|-----------|
| C | -2.444169 | 2.444171  | -2.979822 | C | 2.444170 | 2.444381 | -2.979838 |
| C | 2.444492  | -2.444443 | -2.980066 | C | 1.118144 | 2.903548 | -3.220655 |

|   |           |           |           |   |           |           |           |
|---|-----------|-----------|-----------|---|-----------|-----------|-----------|
| C | 0.704336  | 4.177314  | -2.692311 | C | -4.836192 | -1.393883 | -1.686796 |
| C | -0.704410 | 4.177201  | -2.692303 | C | -5.314340 | -0.687589 | -0.542539 |
| C | -1.118027 | 2.903304  | -3.220577 | C | -5.314422 | 0.687353  | -0.542541 |
| N | 0.000124  | 2.168353  | -3.575004 | C | 1.393753  | -4.836083 | -1.686855 |
| C | 1.118212  | -2.903246 | -3.220731 | C | -1.393598 | -4.835972 | -1.686799 |
| C | 0.704352  | -4.176846 | -2.692174 | C | -0.687419 | -5.314352 | -0.542642 |
| C | -0.704241 | -4.176750 | -2.692142 | C | 0.687558  | -5.314359 | -0.542659 |
| C | -1.117978 | -2.903033 | -3.220614 | C | 1.393706  | 4.836244  | -1.686860 |
| N | 0.000162  | -2.167415 | -3.574362 | C | 0.687394  | 5.314378  | -0.542569 |
| C | -2.903427 | -1.118324 | -3.220668 | C | -1.393783 | 4.836094  | -1.686861 |
| C | -4.177104 | -0.704512 | -2.692157 | C | -0.687530 | 5.314366  | -0.542591 |
| C | -4.177031 | 0.704165  | -2.692142 | C | -2.750205 | 2.750162  | 2.048018  |
| C | -2.903148 | 1.117808  | -3.220485 | C | -1.403593 | 1.403593  | 4.033978  |
| N | -2.167896 | -0.000283 | -3.574503 | C | -3.214116 | 1.451460  | 2.452673  |
| C | 2.903193  | -1.118272 | -3.220583 | C | -1.451530 | 3.214121  | 2.452685  |
| C | 4.176765  | -0.704354 | -2.692055 | C | -0.751020 | 2.485811  | 3.437577  |
| C | 4.176641  | 0.704237  | -2.692017 | C | -2.485791 | 0.750975  | 3.437562  |
| C | 2.902836  | 1.117929  | -3.220361 | H | -0.889946 | 0.889951  | 4.826209  |
| N | 2.167162  | -0.000213 | -3.573906 | C | 2.750009  | 2.750118  | 2.047983  |
| C | -2.444351 | -2.444338 | -2.979976 | C | 1.403156  | 1.403195  | 4.033574  |
| C | 3.224977  | -3.224923 | -1.977730 | C | 1.451305  | 3.214048  | 2.452652  |
| C | 3.355782  | -3.355711 | 0.884122  | C | 3.213961  | 1.451398  | 2.452611  |
| C | 2.632947  | -4.281322 | -1.265042 | C | 2.485633  | 0.750793  | 3.437414  |
| C | 4.281392  | -2.632917 | -1.265031 | C | 0.750730  | 2.485676  | 3.437454  |
| C | 4.317059  | -2.657313 | 0.155331  | H | 0.889314  | 0.889322  | 4.825503  |
| C | 2.657368  | -4.316996 | 0.155275  | C | -2.750044 | -2.750112 | 2.048031  |
| C | -4.316913 | -2.657351 | 0.155405  | C | -1.403120 | -1.403175 | 4.033580  |
| C | -2.632793 | -4.281244 | -1.264952 | C | -3.213971 | -1.451397 | 2.452674  |
| C | -3.355642 | -3.355714 | 0.884235  | C | -1.451310 | -3.214016 | 2.452627  |
| C | -4.281293 | -2.632981 | -1.264970 | C | -0.750714 | -2.485653 | 3.437418  |
| C | -3.224773 | -3.224840 | -1.977634 | C | -2.485613 | -0.750782 | 3.437463  |
| C | -2.657210 | -4.316954 | 0.155356  | H | -0.889257 | -0.889312 | 4.825500  |
| C | -4.316934 | 2.657179  | 0.155255  | C | 2.750232  | -2.750179 | 2.047976  |
| C | -2.632947 | 4.281306  | -1.265046 | C | 1.403611  | -1.403565 | 4.033929  |
| C | -3.355722 | 3.355669  | 0.884149  | C | 1.451543  | -3.214103 | 2.452621  |
| C | -4.281321 | 2.632821  | -1.265027 | C | 3.214121  | -1.451475 | 2.452639  |
| C | -3.224743 | 3.224680  | -1.977637 | C | 2.485805  | -0.750970 | 3.437530  |
| C | -2.657306 | 4.316910  | 0.155279  | C | 0.751040  | -2.485793 | 3.437511  |
| C | 2.632853  | 4.281445  | -1.265029 | H | 0.889963  | -0.889933 | 4.826166  |
| C | 4.316852  | 2.657274  | 0.155299  | C | 0.731369  | 4.218962  | 1.669794  |
| C | 2.657170  | 4.316986  | 0.155316  | C | 1.390474  | 4.837571  | 0.610249  |
| C | 3.224740  | 3.224876  | -1.977634 | C | 4.837493  | 1.390569  | 0.610242  |
| C | 4.281221  | 2.632932  | -1.264983 | C | 4.218896  | 0.731469  | 1.669757  |
| C | 3.355564  | 3.355700  | 0.884151  | C | -1.390618 | 4.837540  | 0.610210  |
| C | 4.836112  | -1.393738 | -1.686811 | C | -0.731546 | 4.218967  | 1.669783  |
| C | 4.835876  | 1.393671  | -1.686746 | C | -4.837561 | 1.390473  | 0.610216  |
| C | 5.314339  | 0.687491  | -0.542569 | C | -4.218940 | 0.731428  | 1.669773  |
| C | 5.314320  | -0.687475 | -0.542607 | C | -1.390469 | -4.837526 | 0.610215  |
| C | -4.836055 | 1.393568  | -1.686787 | C | -0.731371 | -4.218929 | 1.669730  |

|   |           |           |          |    |          |           |           |
|---|-----------|-----------|----------|----|----------|-----------|-----------|
| C | -4.218893 | -0.731486 | 1.669807 | C  | 0.731556 | -4.218950 | 1.669705  |
| C | -4.837473 | -1.390635 | 0.610286 | C  | 1.390642 | -4.837555 | 0.610179  |
| C | 4.837542  | -1.390570 | 0.610237 | Ge | 0.000901 | 0.000381  | -4.385265 |
| C | 4.218948  | -0.731471 | 1.669754 |    |          |           |           |

### Ge@(FP)

|   |           |           |           |   |           |           |           |
|---|-----------|-----------|-----------|---|-----------|-----------|-----------|
| C | 2.488411  | 2.424184  | -2.896541 | C | -1.394164 | -4.814124 | -1.627151 |
| C | -2.487726 | -2.423602 | -2.896449 | C | 1.394360  | -4.815012 | -1.626930 |
| C | 2.489495  | -2.426027 | -2.897003 | C | 0.694417  | -5.297012 | -0.502190 |
| C | 3.005923  | -1.172025 | -3.191284 | C | -0.694355 | -5.296567 | -0.502303 |
| C | 4.219191  | -0.711803 | -2.610412 | C | 1.394089  | 4.814416  | -1.626606 |
| C | 4.218531  | 0.711779  | -2.610436 | C | -1.395016 | 4.814394  | -1.626378 |
| C | 3.004639  | 1.171526  | -3.191115 | C | -0.694848 | 5.297329  | -0.501614 |
| N | 2.232814  | -0.000343 | -3.634125 | C | 0.694093  | 5.297022  | -0.501770 |
| C | -3.003689 | -1.169695 | -3.190072 | C | -4.880423 | -1.400765 | -1.608295 |
| C | -4.218246 | -0.710446 | -2.609749 | C | -4.881923 | 1.402285  | -1.608758 |
| C | -4.219326 | 0.712883  | -2.610844 | C | -5.331689 | 0.684919  | -0.441891 |
| C | -3.006097 | 1.172943  | -3.192275 | C | -5.330944 | -0.683845 | -0.441863 |
| N | -2.231586 | 0.002400  | -3.633568 | C | 4.881377  | -1.401674 | -1.608699 |
| C | -1.123788 | 2.873363  | -3.148490 | C | 5.331511  | -0.684446 | -0.442148 |
| C | -0.707712 | 4.129969  | -2.636292 | C | 4.881102  | 1.401714  | -1.608941 |
| C | 0.706312  | 4.129945  | -2.636332 | C | 5.331335  | 0.684477  | -0.442247 |
| C | 1.122039  | 2.873389  | -3.148514 | C | 2.758946  | 2.740814  | 2.120159  |
| N | -0.000923 | 2.110227  | -3.450995 | C | 1.401660  | 1.403687  | 4.104123  |
| C | -1.121855 | -2.874466 | -3.150324 | C | 1.453776  | 3.202783  | 2.510205  |
| C | -0.706822 | -4.133373 | -2.639684 | C | 3.225366  | 1.447289  | 2.537552  |
| C | 0.707375  | -4.134081 | -2.639684 | C | 2.487891  | 0.749391  | 3.520395  |
| C | 1.122967  | -2.876349 | -3.150708 | C | 0.751033  | 2.483634  | 3.497976  |
| N | 0.000994  | -2.110300 | -3.450636 | H | 0.884716  | 0.893217  | 4.896447  |
| C | -2.490631 | 2.425162  | -2.897117 | C | 2.759577  | -2.741637 | 2.120085  |
| C | -3.255478 | -3.211028 | -1.900341 | C | 1.403469  | -1.405822 | 4.105111  |
| C | -3.368497 | -3.341359 | 0.955128  | C | 3.226098  | -1.448284 | 2.537738  |
| C | -4.315969 | -2.625153 | -1.190310 | C | 1.454798  | -3.204081 | 2.510337  |
| C | -2.634603 | -4.253075 | -1.188198 | C | 0.752291  | -2.484894 | 3.498168  |
| C | -2.667195 | -4.304921 | 0.220305  | C | 2.488556  | -0.750738 | 3.520667  |
| C | -4.340881 | -2.650156 | 0.244306  | H | 0.886344  | -0.895432 | 4.897370  |
| C | -2.668117 | 4.305994  | 0.221243  | C | -2.759762 | 2.741539  | 2.120563  |
| C | -4.317421 | 2.626159  | -1.189788 | C | -1.403421 | 1.405463  | 4.105529  |
| C | -3.369444 | 3.342322  | 0.955847  | C | -1.454859 | 3.203675  | 2.510713  |
| C | -2.635893 | 4.254147  | -1.187242 | C | -3.226183 | 1.448309  | 2.538179  |
| C | -3.257188 | 3.212062  | -1.899647 | C | -2.488536 | 0.750599  | 3.521013  |
| C | -4.342051 | 2.651122  | 0.244828  | C | -0.752258 | 2.484386  | 3.498495  |
| C | 2.667326  | 4.305545  | 0.221095  | H | -0.886262 | 0.894910  | 4.897666  |
| C | 4.316173  | 2.625454  | -1.190006 | C | -2.758832 | -2.740790 | 2.119878  |
| C | 3.368708  | 3.341838  | 0.955591  | C | -1.401585 | -1.404047 | 4.103911  |
| C | 2.634731  | 4.253655  | -1.187467 | C | -3.225176 | -1.447260 | 2.537425  |
| C | 3.255675  | 3.211344  | -1.899711 | C | -1.453832 | -3.203143 | 2.509947  |
| C | 4.341267  | 2.650607  | 0.244538  | C | -0.751039 | -2.484128 | 3.497711  |
| C | 4.316798  | -2.626081 | -1.190156 | C | -2.487727 | -0.749547 | 3.520324  |
| C | 2.667684  | -4.305955 | 0.220665  | H | -0.884572 | -0.893738 | 4.896286  |
| C | 4.341680  | -2.650965 | 0.244393  | C | 4.238258  | -0.726181 | 1.772904  |
| C | 3.256459  | -3.212558 | -1.899967 | C | 4.853462  | -1.387940 | 0.701051  |
| C | 2.635043  | -4.254214 | -1.187762 | C | 1.392683  | -4.823481 | 0.660409  |
| C | 3.369119  | -3.342203 | 0.955273  | C | 0.733502  | -4.203224 | 1.714657  |

|   |           |          |          |    |           |           |           |
|---|-----------|----------|----------|----|-----------|-----------|-----------|
| C | 4.853189  | 1.387688 | 0.701227 | C  | -1.392372 | -4.822755 | 0.660214  |
| C | 4.237992  | 0.725636 | 1.772929 | C  | -0.732954 | -4.202719 | 1.714471  |
| C | 1.392127  | 4.822613 | 0.660748 | C  | -4.237749 | -0.725467 | 1.772969  |
| C | 0.732758  | 4.202276 | 1.714784 | C  | -4.852743 | -1.387284 | 0.701206  |
| C | -4.853737 | 1.388195 | 0.701602 | Ge | -0.001584 | 0.002140  | -2.622467 |
| C | -4.238336 | 0.726361 | 1.773291 | H  | -2.032908 | 0.003757  | -4.635335 |
| C | -0.733607 | 4.202702 | 1.714963 | H  | 2.037266  | -0.002621 | -4.636662 |
| C | -1.392862 | 4.823201 | 0.660886 |    |           |           |           |

### Ge@(FP-Ge)

|   |           |           |           |   |           |           |           |
|---|-----------|-----------|-----------|---|-----------|-----------|-----------|
| C | -2.335191 | 2.330490  | -2.964658 | C | 3.342198  | 3.342549  | -1.914681 |
| C | 2.331040  | -2.334865 | -2.964375 | C | 4.372250  | 2.703385  | -1.197514 |
| C | 2.592870  | 2.593000  | -2.937217 | C | 3.377046  | 3.377457  | 0.942378  |
| C | 1.261204  | 3.036702  | -3.178415 | C | 4.826699  | -1.352019 | -1.669027 |
| C | 0.777390  | 4.277669  | -2.665751 | C | 4.912639  | 1.451074  | -1.629920 |
| C | -0.643281 | 4.191648  | -2.673058 | C | 5.346485  | 0.714675  | -0.483918 |
| C | -1.015499 | 2.896365  | -3.196398 | C | 5.307815  | -0.661531 | -0.512907 |
| N | 0.175061  | 2.229675  | -3.461574 | C | -4.791590 | 1.347513  | -1.668913 |
| C | 1.015614  | -2.888331 | -3.264613 | C | -4.879120 | -1.436530 | -1.636576 |
| C | 0.642374  | -4.153572 | -2.672235 | C | -5.328299 | -0.709724 | -0.491651 |
| C | -0.769995 | -4.249559 | -2.674242 | C | -5.286394 | 0.662582  | -0.517667 |
| C | -1.261118 | -3.052883 | -3.284066 | C | 1.348305  | -4.791436 | -1.669168 |
| N | -0.189678 | -2.316959 | -3.736819 | C | -1.435716 | -4.878632 | -1.636874 |
| C | -3.054268 | -1.261853 | -3.284099 | C | -0.709013 | -5.328241 | -0.492012 |
| C | -4.250905 | -0.770869 | -2.674390 | C | 0.663345  | -5.286224 | -0.517984 |
| C | -4.154833 | 0.641747  | -2.672635 | C | 1.450714  | 4.912794  | -1.630223 |
| C | -2.889429 | 1.015078  | -3.265189 | C | 0.714069  | 5.346233  | -0.484049 |
| N | -2.319514 | -0.190435 | -3.737839 | C | -1.352383 | 4.825901  | -1.669184 |
| C | 2.896917  | -1.015326 | -3.196006 | C | -0.662010 | 5.307361  | -0.512999 |
| C | 4.191801  | -0.642936 | -2.672678 | C | -2.735851 | 2.735611  | 2.075792  |
| C | 4.277531  | 0.777685  | -2.665409 | C | -1.396284 | 1.395277  | 4.067946  |
| C | 3.036711  | 1.261257  | -3.178165 | C | -3.206079 | 1.441297  | 2.486424  |
| N | 2.229828  | 0.175031  | -3.460206 | C | -1.441076 | 3.204987  | 2.485474  |
| C | -2.593434 | -2.593338 | -3.025724 | C | -0.744678 | 2.481286  | 3.475237  |
| C | 3.123755  | -3.122713 | -1.962114 | C | -2.481820 | 0.744069  | 3.476319  |
| C | 3.326614  | -3.324306 | 0.897465  | H | -0.880813 | 0.880256  | 4.857982  |
| C | 2.565678  | -4.200455 | -1.253890 | C | 2.759587  | 2.759937  | 2.096069  |
| C | 4.207753  | -2.561057 | -1.253806 | C | 1.410436  | 1.410560  | 4.081807  |
| C | 4.276599  | -2.620218 | 0.163708  | C | 1.459256  | 3.218831  | 2.498119  |
| C | 2.626352  | -4.275992 | 0.166474  | C | 3.218683  | 1.459620  | 2.498134  |
| C | -4.337267 | -2.676962 | 0.204975  | C | 2.488748  | 0.756939  | 3.480798  |
| C | -2.687198 | -4.343129 | -1.217674 | C | 0.756666  | 2.488775  | 3.480832  |
| C | -3.368463 | -3.368748 | 0.931127  | H | 0.899064  | 0.899072  | 4.877136  |
| C | -4.343076 | -2.687728 | -1.217475 | C | -2.757507 | -2.757831 | 2.091734  |
| C | -3.316229 | -3.316468 | -1.947094 | C | -1.412094 | -1.412286 | 4.082485  |
| C | -2.676363 | -4.337389 | 0.204648  | C | -3.218458 | -1.459252 | 2.496305  |
| C | -4.276118 | 2.625549  | 0.166569  | C | -1.458842 | -3.218605 | 2.496134  |
| C | -2.561248 | 4.206905  | -1.253783 | C | -0.757188 | -2.489494 | 3.480601  |
| C | -3.324644 | 3.326044  | 0.897469  | C | -2.489390 | -0.757509 | 3.480790  |
| C | -4.200396 | 2.564692  | -1.253603 | H | -0.900948 | -0.901115 | 4.878235  |
| C | -3.122590 | 3.122694  | -1.961867 | C | 2.736013  | -2.735604 | 2.075725  |
| C | -2.620501 | 4.275924  | 0.163591  | C | 1.395461  | -1.396087 | 4.067791  |
| C | 2.702926  | 4.372573  | -1.197739 | C | 1.441745  | -3.205890 | 2.486206  |
| C | 4.354735  | 2.686259  | 0.222515  | C | 3.205187  | -1.440731 | 2.485432  |
| C | 2.685792  | 4.355013  | 0.222480  | C | 2.481399  | -0.744387 | 3.475161  |



|   |           |           |          |    |           |           |           |
|---|-----------|-----------|----------|----|-----------|-----------|-----------|
| C | 0.744405  | -2.481686 | 3.476094 | C  | -1.403623 | -4.849751 | 0.659465  |
| H | 0.880393  | -0.880681 | 4.857833 | C  | -0.740255 | -4.221115 | 1.712499  |
| C | 0.740445  | 4.222460  | 1.715403 | C  | -4.221142 | -0.740828 | 1.712823  |
| C | 1.405162  | 4.858029  | 0.667914 | C  | -4.849717 | -1.404299 | 0.659766  |
| C | 4.858037  | 1.405677  | 0.668017 | C  | 4.815706  | -1.369868 | 0.629979  |
| C | 4.222480  | 0.740918  | 1.715428 | C  | 4.210902  | -0.718372 | 1.703077  |
| C | -1.370320 | 4.815383  | 0.629860 | C  | 0.720310  | -4.210852 | 1.704109  |
| C | -0.718820 | 4.210704  | 1.703056 | C  | 1.374582  | -4.810977 | 0.629965  |
| C | -4.811265 | 1.373880  | 0.630198 | Ge | -0.595729 | -0.593997 | -4.803091 |
| C | -4.211041 | 0.719742  | 1.704398 | Ge | 0.373930  | 0.374808  | -2.734782 |

# 5 Spectral Appendix (NMR, MS)

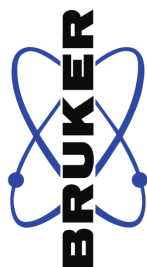

107098/Hoelzel/HH46HPLC/10mg/CDCl3/1H/RT/Maid

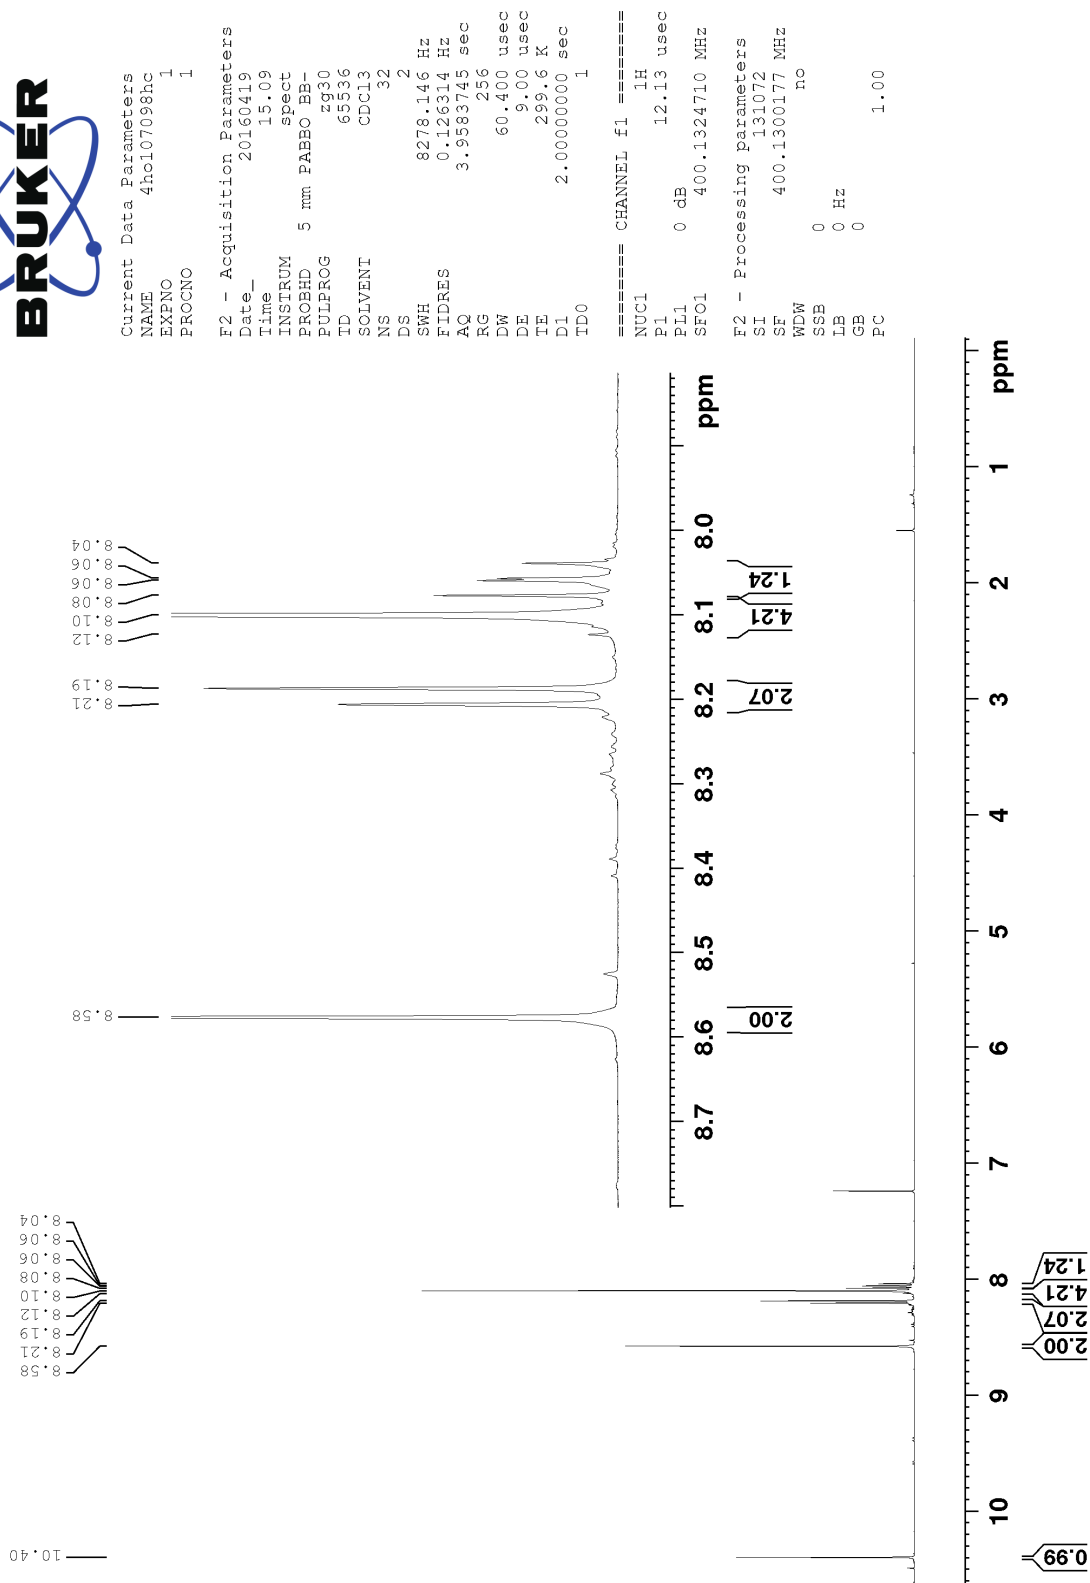

Supplementary Fig. 17. <sup>1</sup>H NMR (400 MHz, CDCl<sub>3</sub>, rt) of 3.

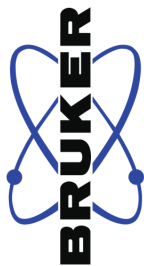

Current Data Parameters  
 NAME 4ho107098hc  
 EXPNO 2  
 PROCNO 1

F2 - Acquisition Parameters  
 Date\_ 20160419  
 Time 15.21  
 INSTRUM spect  
 PROBHD 5 mm PABBO EB-  
 PULPROG zgpg30  
 ID 65536  
 SOLVENT CDCl3  
 NS 546  
 DS 4  
 SWH 23980.814 Hz  
 FIDRES 0.365918 Hz  
 AQ 1.3664256 sec  
 RG 46341  
 DW 20.850 usec  
 DE 9.00 usec  
 TE 299.7 K  
 D1 4.0000000 sec  
 d11 0.0300000 sec  
 DELTA 3.90000010 sec  
 TD0 1  
 SFO1 100.6227898 MHz  
 NUC1 13C  
 P1 7.00 usec  
 PLW1 -1.0000000 W  
 SFO2 400.1316005 MHz  
 NUC2 1H  
 CPDPRG2 waltz16  
 PCPD2 116.00 usec  
 PLW2 -1.0000000 W  
 PLW12 -1.0000000 W  
 PLW13 -1.0000000 W

F2 - Processing parameters  
 SI 32768  
 SF 100.6127713 MHz  
 WDW EM  
 SSB 0  
 LB 1.00 Hz  
 GB 0  
 PC 1.40

107098/Hoelzel/HH46HPLC/10mg/CDCl3/13C/RT/Maid

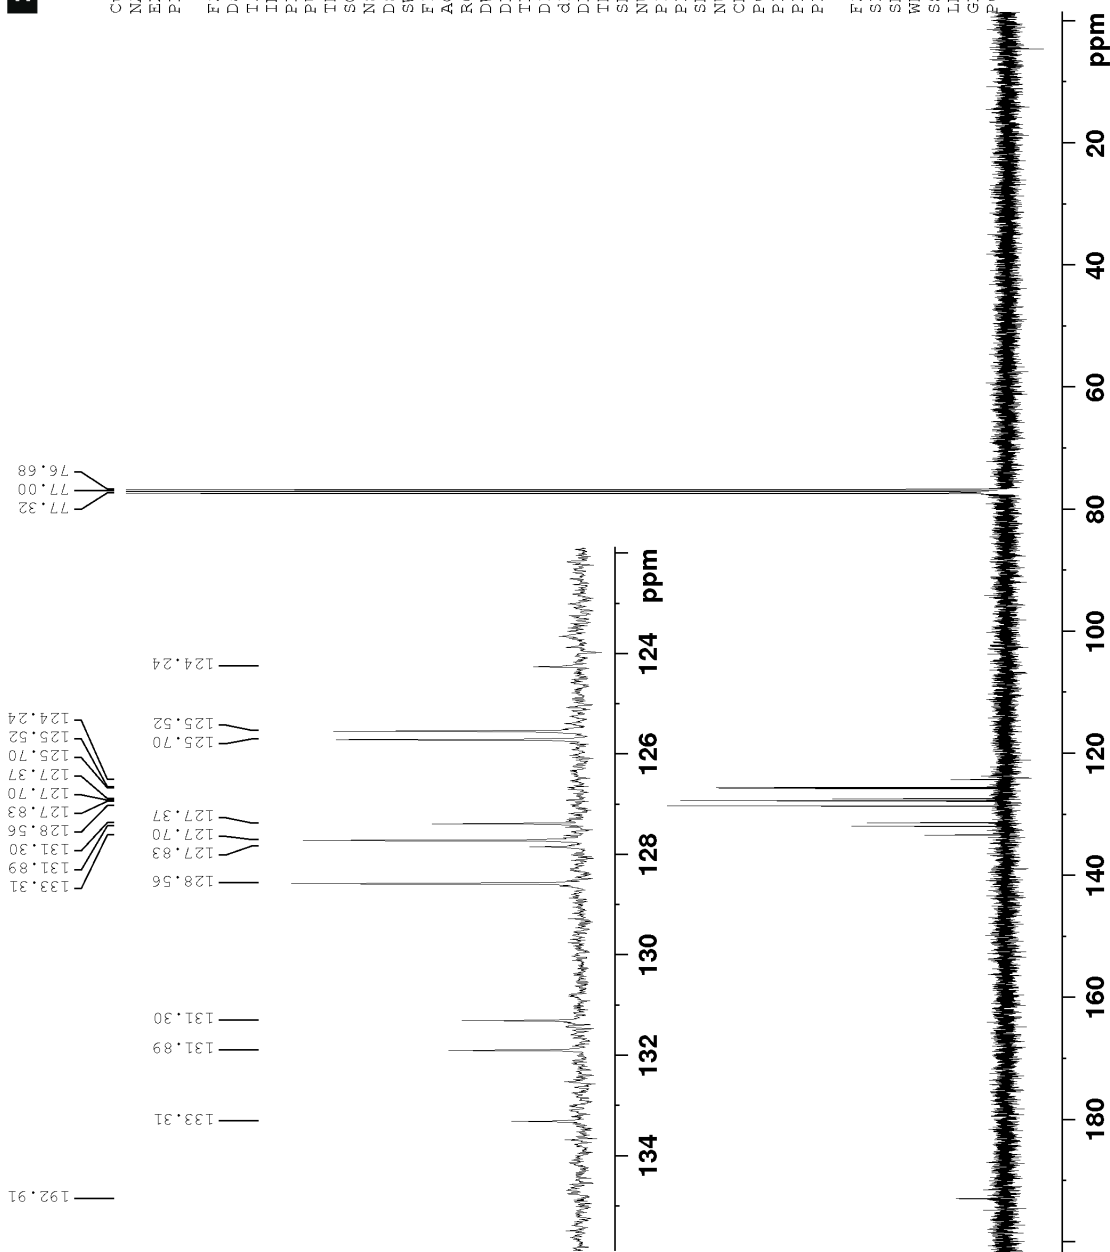

Supplementary Fig. 18. <sup>13</sup>C NMR (100 MHz, CDCl<sub>3</sub>, rt) of **3**.

# Display Report

**Analysis Info**  
 Analysis Name: D:\Data\2019\Jux-2019\HoelzeltHH-46-appi-.d  
 Method: tune\_low-APPI.m  
 Sample Name: CH2Cl2 THF  
 Acquisition Date: 8/15/2019 10:59:59 AM  
 Operator: MD  
 Instrument: maXis  
 288882.20183

**Acquisition Parameter**  
 Source Type: APPI  
 Focus: Not active  
 Scan Begin: 50 m/z  
 Scan End: 1550 m/z  
 Ion Polarity: Positive  
 Set Capillary: 700 V  
 Set End Plate Offset: -500 V  
 Set Charging Voltage: 0 V  
 Set Corona: 0 nA  
 Set Nebulizer: 2.0 Bar  
 Set Dry Heater: 220 °C  
 Set Dry Gas: 1.0 l/min  
 Set Divert Valve: Waste  
 Set APPI Heater: 250 °C

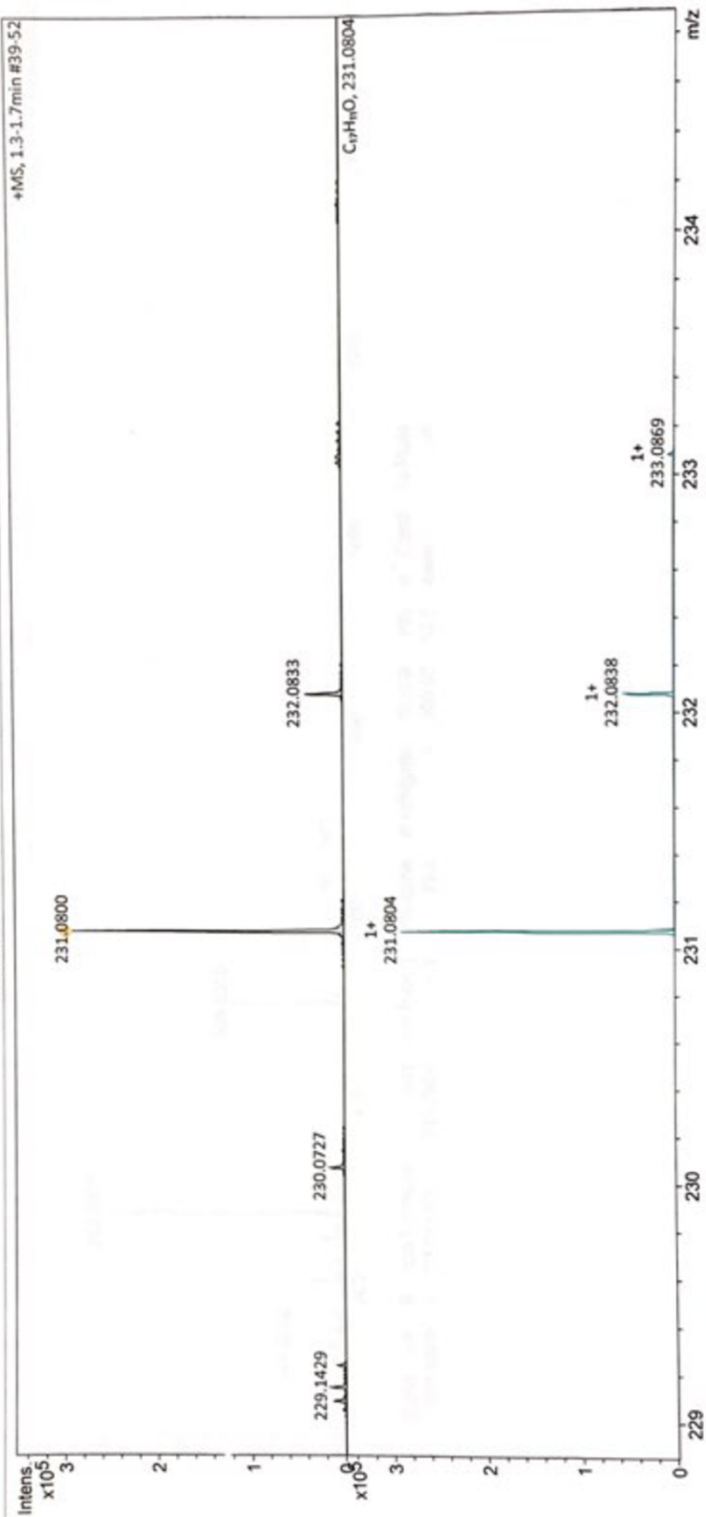

Supplementary Fig. 19. HRMS (APPI; CH<sub>2</sub>Cl<sub>2</sub>, THF) of 3.

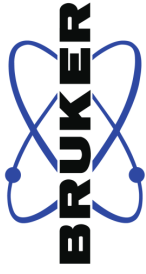

0.74  
0.64

hh50neu

Current Data Parameters  
NAME 4ho012954  
EXPNO 10  
PROCNO 1  
F2 - Acquisition Parameters  
Date\_ 20190809  
Time 11.47 h  
INSTRUM CAB AV4 400 MHZ BASIC  
PROBHD Z108618\_0982 (z930)  
PULPROG zg30  
TD 65536  
SOLVENT CDCl3  
NS 64  
DS 2  
SWH 8196.722 Hz  
FIDRES 0.250144 Hz  
AQ 3.9976959 sec  
RG 101  
DW 61.000 usec  
DE 12.31 usec  
TE 298.8 K  
D1 2.00000000 sec  
TD0 1  
SF01 400.3524021 MHz  
NUC1 1H  
P1 14.00 usec  
PLW1 12.09300041 W  
F2 - Processing parameters  
SI 32768  
SF 400.3500172 MHz  
WDW EM  
SSB 0  
LB 0.30 Hz  
GB 0  
PC 1.00

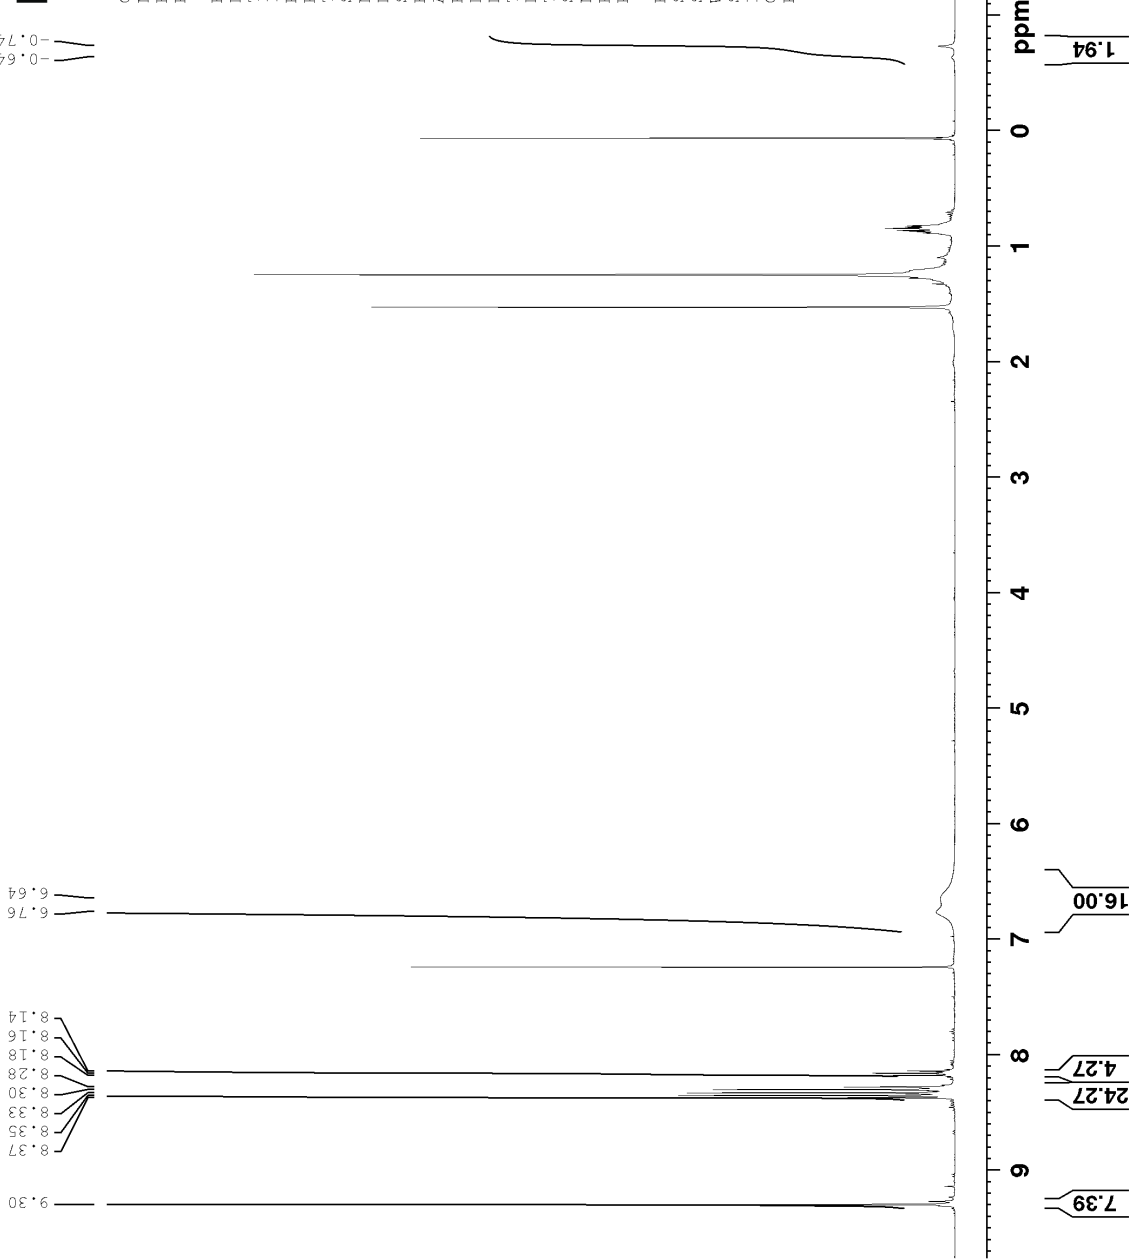

Supplementary Fig. 20. <sup>1</sup>H NMR (400 MHz, CDCl<sub>3</sub>, rt) of 1.

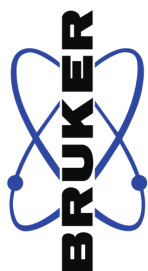

Current Data Parameters  
NAME 4ho012954  
EXNO 11  
PROCNO 1

F2 - Acquisition Parameters

Date\_ 20190810  
Time\_ 4.29 h  
INSTRUM CAB AV4 400 MHz BASIC  
PROBHD Z108618\_0982 ( zpgp30  
PULPROG zgpg30  
TD 65536  
SOLVENT CDC13  
NS 4096  
DS 4  
SWH 23809.523 Hz  
FIDRES 0.726609 Hz  
AQ 1.3762560 sec  
RG 23.4375  
DW 21.000 usec  
DE 6.50 usec  
TE 299.8 K  
D1 2.00000000 sec  
D11 0.03000000 sec  
TD0 1  
SF01 100.6781544 MHz  
NUC1 13C  
P1 10.00 usec  
PLW1 58.38000107 W  
SF02 400.3516014 MHz  
NUC2 1H  
CPDPRG[2] waltz16  
PCPD2 90.00 usec  
PLW2 12.09300041 W  
PLW12 0.29260999 W  
PLW13 0.14718001 W  
F2 - Processing parameters  
SI 32768  
SF 100.6680905 MHz  
WDW EM  
SSB 0  
LB 1.00 Hz  
GB 0  
PC 1.40

hh50neu

139.43  
131.71  
131.58  
130.99  
128.26  
128.23  
126.47  
125.95  
125.48  
124.95  
124.86  
124.24  
116.13

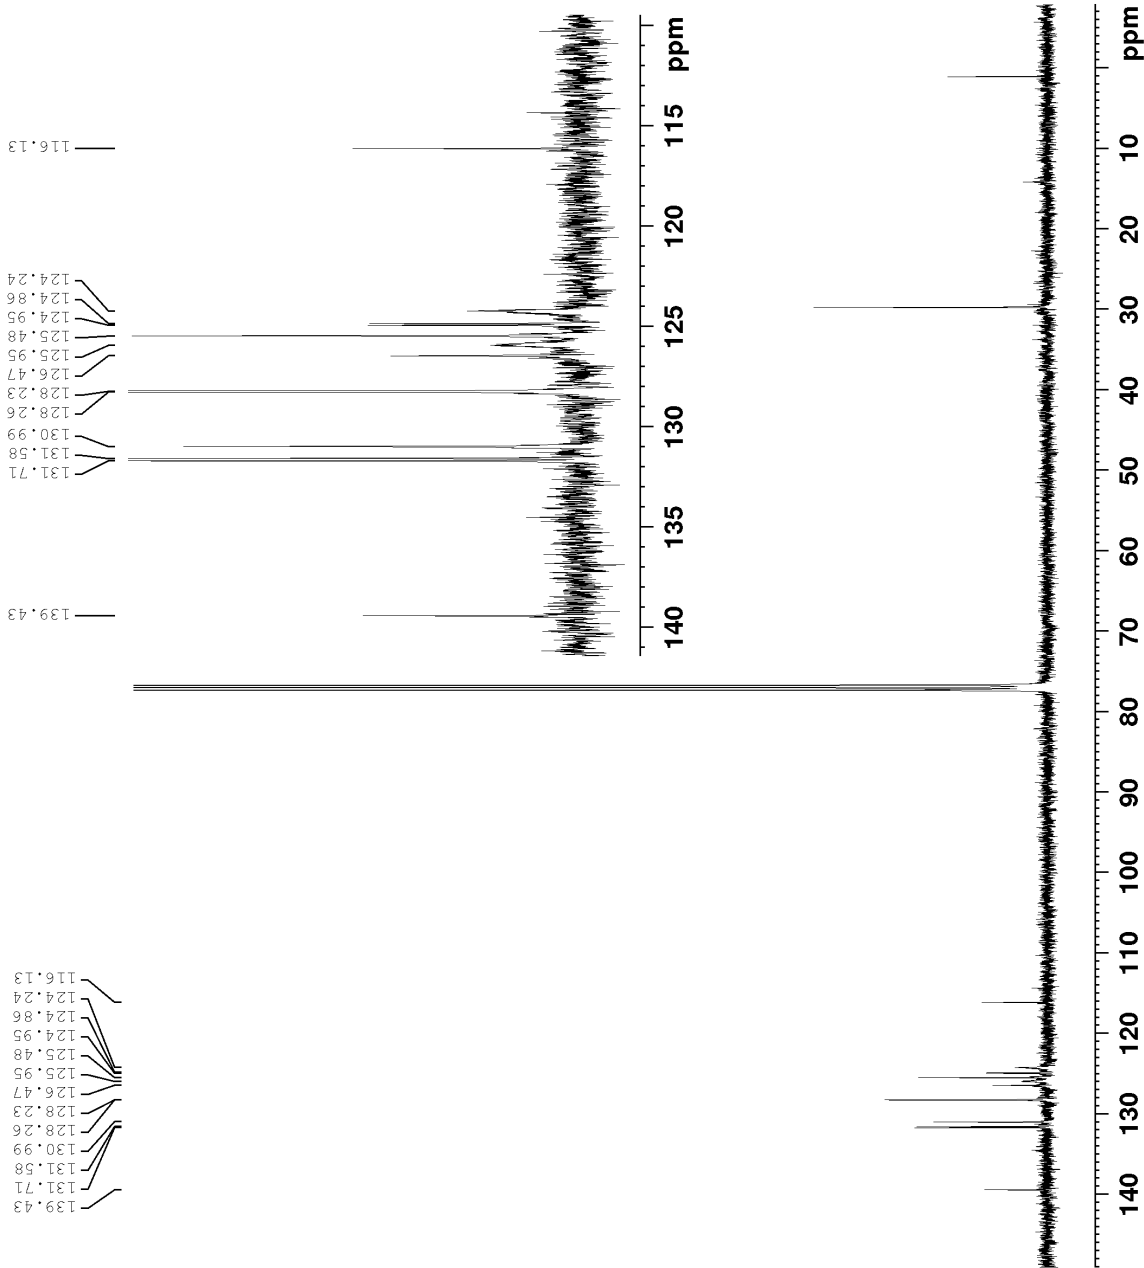

Supplementary Fig. 21. <sup>13</sup>C NMR (100 MHz, CDCl<sub>3</sub>, rt) of 1.

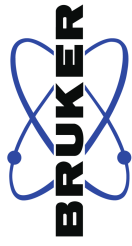

001370/Hörlzel/HH50/5mg/THF/1H/25°C/Maid

9.31  
8.41  
8.41  
8.39  
8.38  
8.36  
8.34  
8.18  
8.17  
8.16  
6.73  
4.48  
4.48  
4.48  
2.43  
0.49  
0.48  
0.47

Current Data Parameters  
NAME 56h001370  
EXPNO 1  
PROCNO 1  
F2 - Acquisition Parameters  
Date\_ 20220628  
Time 16.06 h  
INSTRUM CAB AV4 600 MHz BASIC  
PROBHD Z150290-0003 (z950)  
PULPROG zg30  
TD 131072  
SOLVENT THF  
NS 32  
DS 2  
SWH 12500.000 Hz  
FIDRES 0.190735 Hz  
AQ 5.2428799 sec  
RG 36  
DW 40.000 usec  
DE 18.29 usec  
TE 298.1 K  
D1 2.0000000 sec  
TD0 4  
SFO1 600.7036042 MHz  
NUC1 1H  
P0 3.33 usec  
P1 10.00 usec  
PLW1 18.79999924 W  
F2 - Processing parameters  
SI 131072  
SF 600.7000197 MHz  
WDW EM  
SSB 0  
LB 0.30 Hz  
GB 0  
PC 1.00

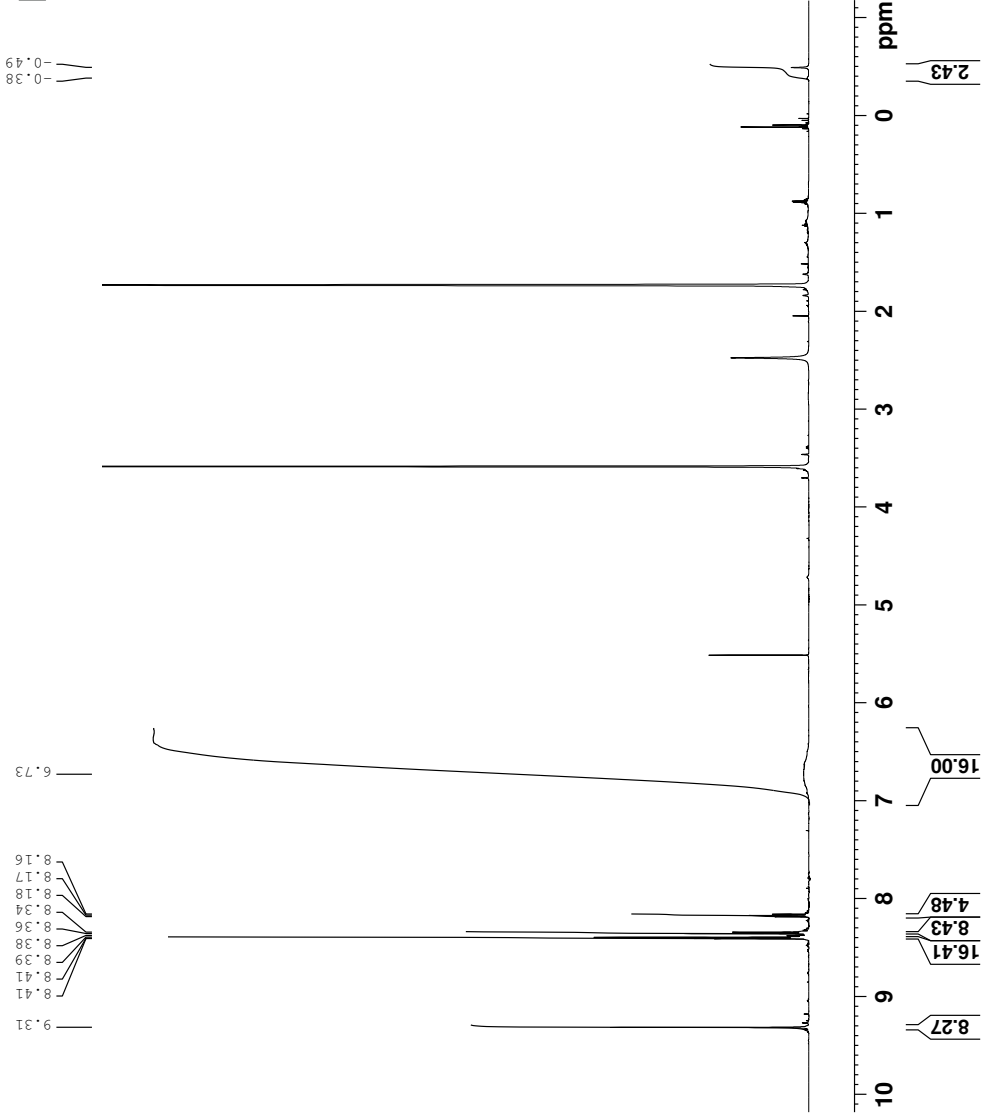

Supplementary Fig. 22. <sup>1</sup>H NMR (600 MHz, THF-D<sub>8</sub>, rt) of 1.

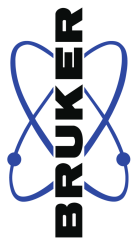

Current Data Parameters  
NAME S6hc001370  
EXPNO 2  
PROCNO 1

F2 - Acquisition Parameters  
Date\_ 20220628  
Time\_ 16:29 h  
INSTRUM CAB AV4 600 MHz BASIC  
PROBHD Z150290\_0003  
PULPROG zgpg30  
TD 65536  
SOLVENT THF  
NS 264  
DS 4  
SWH 35714.285 Hz  
FIDRES 1.089913 Hz  
AQ 0.9175040 sec  
RG 101  
DW 14.000 usec  
DE 25.00 usec  
TE 298.2 K  
D1 2.00000000 sec  
D11 0.03000000 sec  
D0 128  
SFO1 151.0612398 MHz  
NUC1 13C  
P0 3.53 usec  
P1 10.60 usec  
PLW1 19.89299985 W  
SFO2 600.7024028 MHz  
NUC2 1H  
CPDPRG2 waltz16  
PCPD2 70.00 usec  
PLW2 18.79999924 W  
PLW12 0.38367000 W  
PLW13 0.19298001 W

F2 - Processing parameters  
SI 131072  
SF 151.0460054 MHz  
WDW EM  
SSB 0  
LB 1.00 Hz  
GB 0  
PC 1.40

001370/Hölzel/HH50/5mg/THF/13C{1H}/25°C/Maid

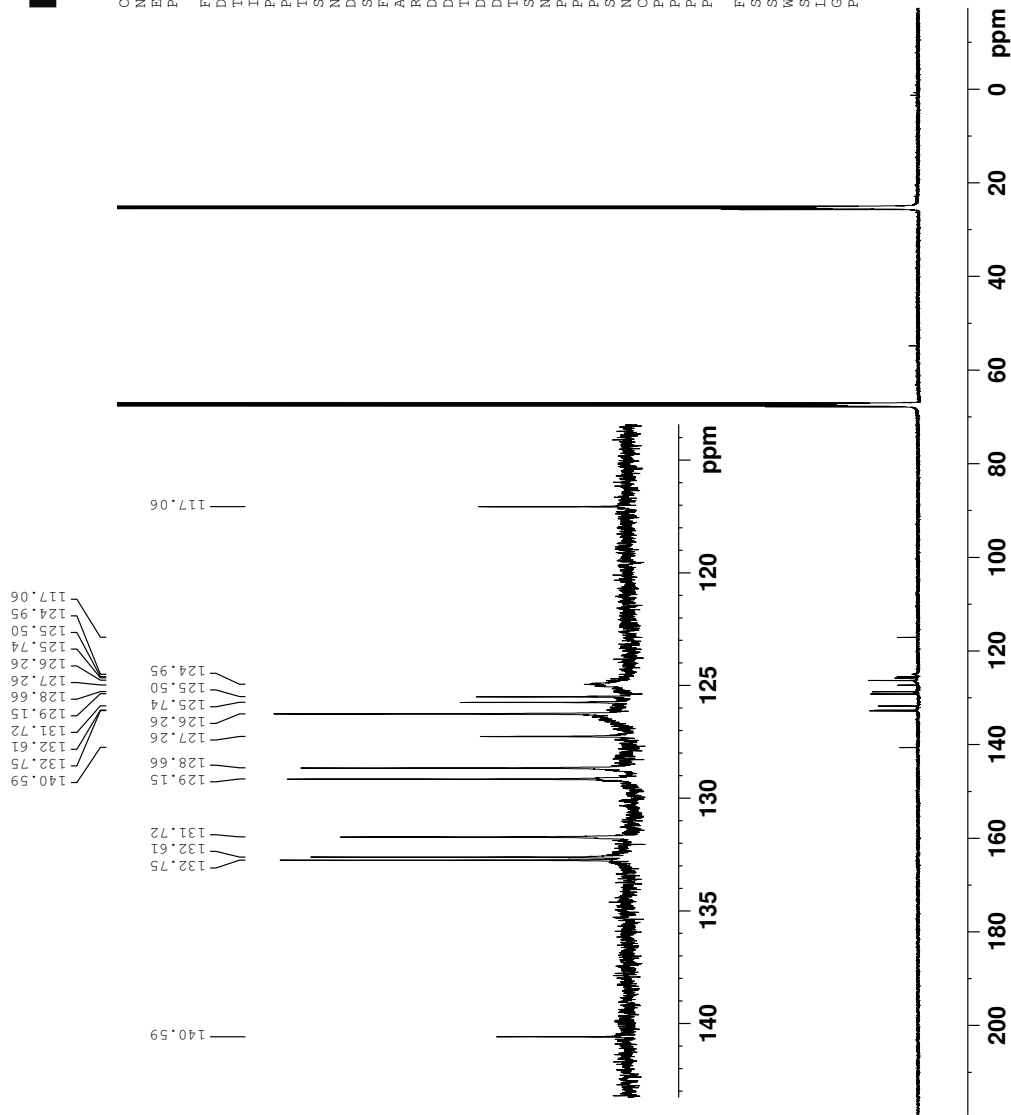

Supplementary Fig. 23.  $^{13}\text{C}$  NMR (150 MHz, THF- $\text{D}_8$ , rt) of **1**.



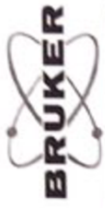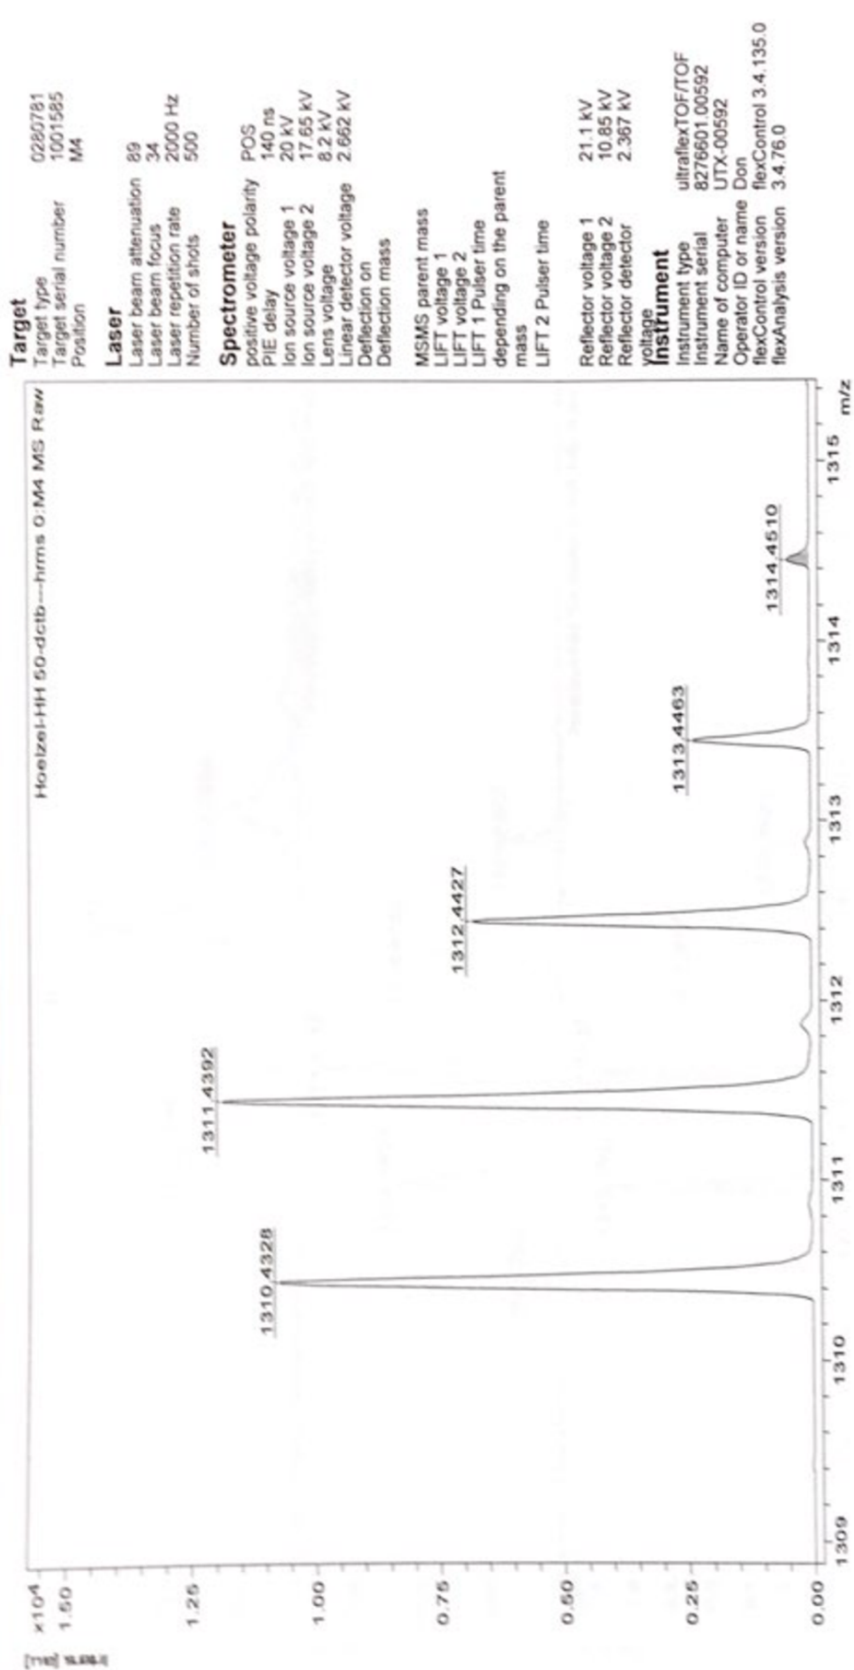

Date of Acquisition 2019-07-11T15:31:00.156+02:00 printed: 7/11/2019 3:32:29 PM  
 Acquisition method D:\Methods\flexControlMethods\Don-70-2100.par  
 Processing method  
 File Name D:\Data\2019\Jux-2019\Hoelzel-HH 50-dctb---hrms\0\_M411

|              |             |
|--------------|-------------|
| Viewed by    | Date / Sign |
| Performed by | Date / Sign |

**Bruker Daltonics**

Supplementary Fig. 24. HRMS (MALDI, DCTB) of 1.

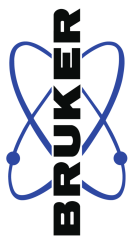

Current Data Parameters  
NAME S6ho001371  
EXPNO 1  
PROCNO 1

F2 - Acquisition Parameters  
Date\_ 20220628  
Time 16.40 h  
INSTRUM CAB AV4 600 MHz BASIC  
PROBHD Z150290\_0003 (4g30  
PULPROG zg30  
TD 131072  
SOLVENT THF  
NS 32  
DS 2  
SWH 12500.000 Hz  
FIDRES 0.190735 Hz  
AQ 5.2428799 sec  
RG 36  
DW 40.000 usec  
DE 18.29 usec  
TE 298.1 K  
D1 2.00000000 sec  
TD0 4  
SF01 600.7036042 MHz  
NUC1 1H  
P0 3.33 usec  
P1 10.00 usec  
PLW1 18.79999924 W

F2 - Processing parameters  
SI 131072  
SF 600.7000201 MHz  
WDW EM  
SSB 0  
LB 0.30 Hz  
GB 0  
PC 1.00

001371/HöLzel/HH50Pb/1mg/THF/1H/25°C/Maid

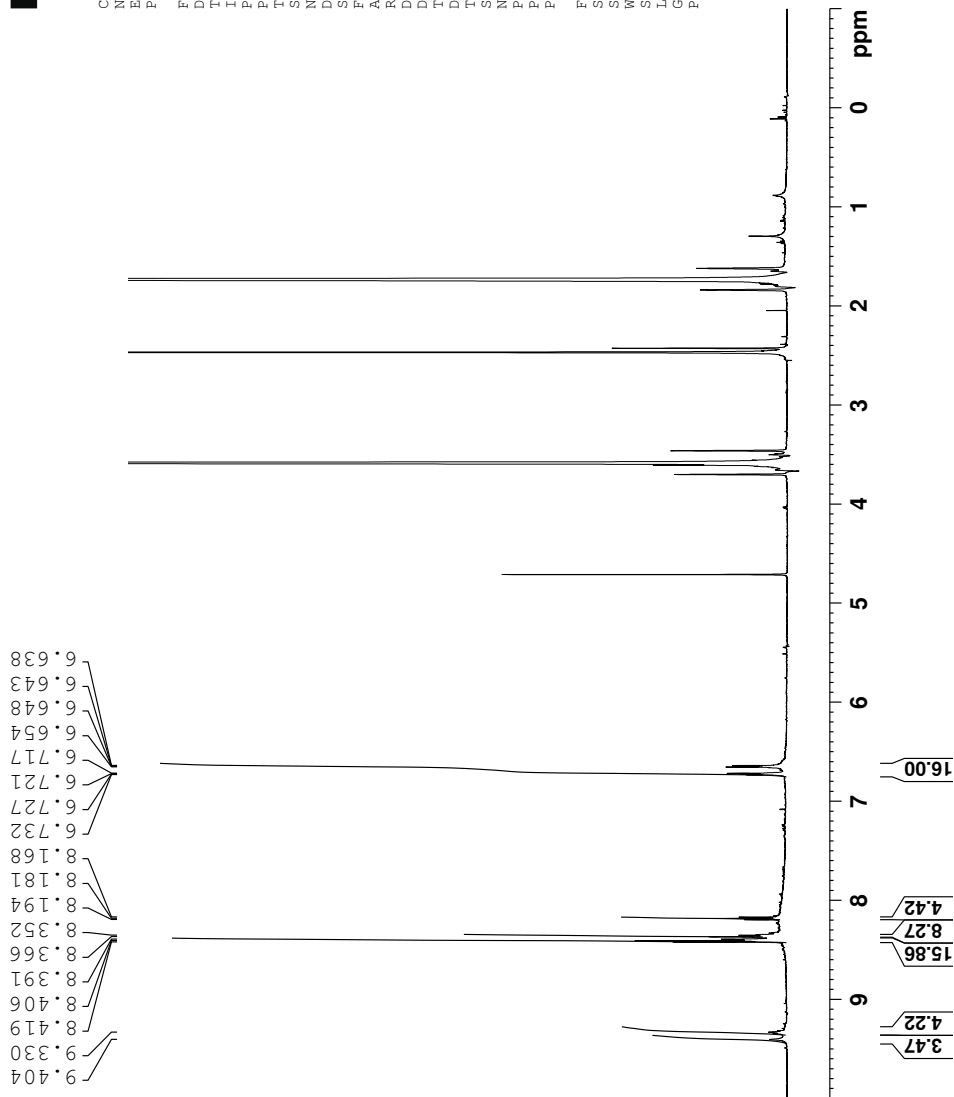

Supplementary Fig. 25.  $^1\text{H}$  NMR (600 MHz, THF- $\text{D}_8$ , rt) of **1Pb**.

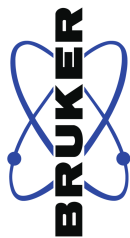

Current Data Parameters  
 NAME S6ho001371  
 EXPNO 2  
 PROCNO 1

F2 - Acquisition Parameters  
 Date\_ 20220629  
 Time\_ 9.16 h  
 INSTRUM CAB AV4 600 MHz BASIC  
 PROBDH Z150290\_0003 ( 20030  
 PULPROG zgpg30  
 TD 65536  
 SOLVENT THF  
 NS 17312  
 DS 4  
 SWH 35714.285 Hz  
 FIDRES 1.089913 Hz  
 AQ 0.9175040 sec  
 RG 11  
 DC 141000 usec  
 DE 2500 usec  
 TE 298.1 K  
 D1 2.0000000 sec  
 D11 0.0300000 sec  
 TD0 15280  
 SF01 151.0612398 MHz  
 NUC1 <sup>13</sup>C  
 F0 3.55 usec  
 F1 10.60 usec  
 PLW1 19.89299965 W  
 SF02 600.7024028 MHz  
 NUC2 <sup>1</sup>H  
 CPDPRG[2] walzr16  
 FCFD2 70.00 usec  
 PLW2 18.79999924 W  
 PLW12 0.38367000 W  
 PLW13 0.19298001 W

F2 - Processing Parameters  
 SI 131072  
 SF 151.0460051 MHz  
 WDW EM  
 SSB 0  
 LB 1.00 Hz  
 GB 0  
 PC 1.40

001371/Hö1ze1/HH50Pb/1mg/THF/<sup>13</sup>C{<sup>1</sup>H}/25°C/Maid

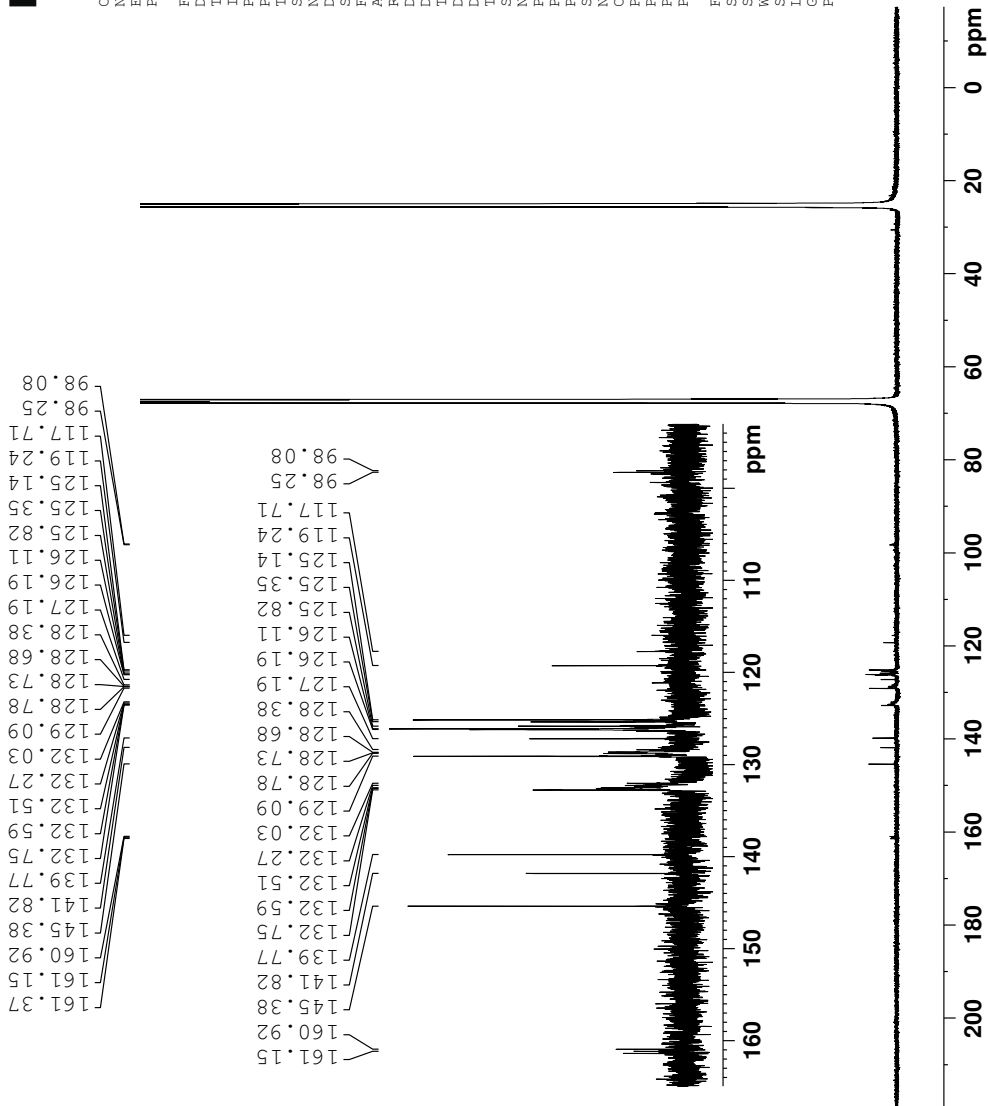

Supplementary Fig. 26. <sup>13</sup>C NMR (150 MHz, THF-D<sub>8</sub>, rt) of 1Pb.

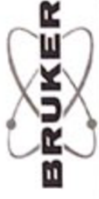

**Target**  
Target type 0280781  
Target serial number 1001585  
Position N2

**Laser**  
Laser beam attenuation 68  
Laser beam focus 34  
Laser repetition rate 2000 Hz  
Number of shots 500

**Spectrometer**  
positive voltage polarity POS  
PIE delay 140 ns  
Ion source voltage 1 20 kV  
Ion source voltage 2 17.65 kV  
Lens voltage 8.2 kV  
Linear detector voltage 2.95 kV  
Deflection on  
Deflection mass

MSMS parent mass  
LIFT voltage 1  
LIFT voltage 2  
LIFT 1 Pulser time  
depending on the parent  
mass  
LIFT 2 Pulser time

Reflector voltage 1 21.1 kV  
Reflector voltage 2 10.85 kV  
Reflector detector  
voltage 2.367 kV

**Instrument**  
Instrument type ultraflexTOF/TOF  
Instrument serial 8276601.00592  
Name of computer UTX-00592  
Operator ID or name Don  
flexControl version flexControl 3.4.135.0  
flexAnalysis version 3.4.76.0

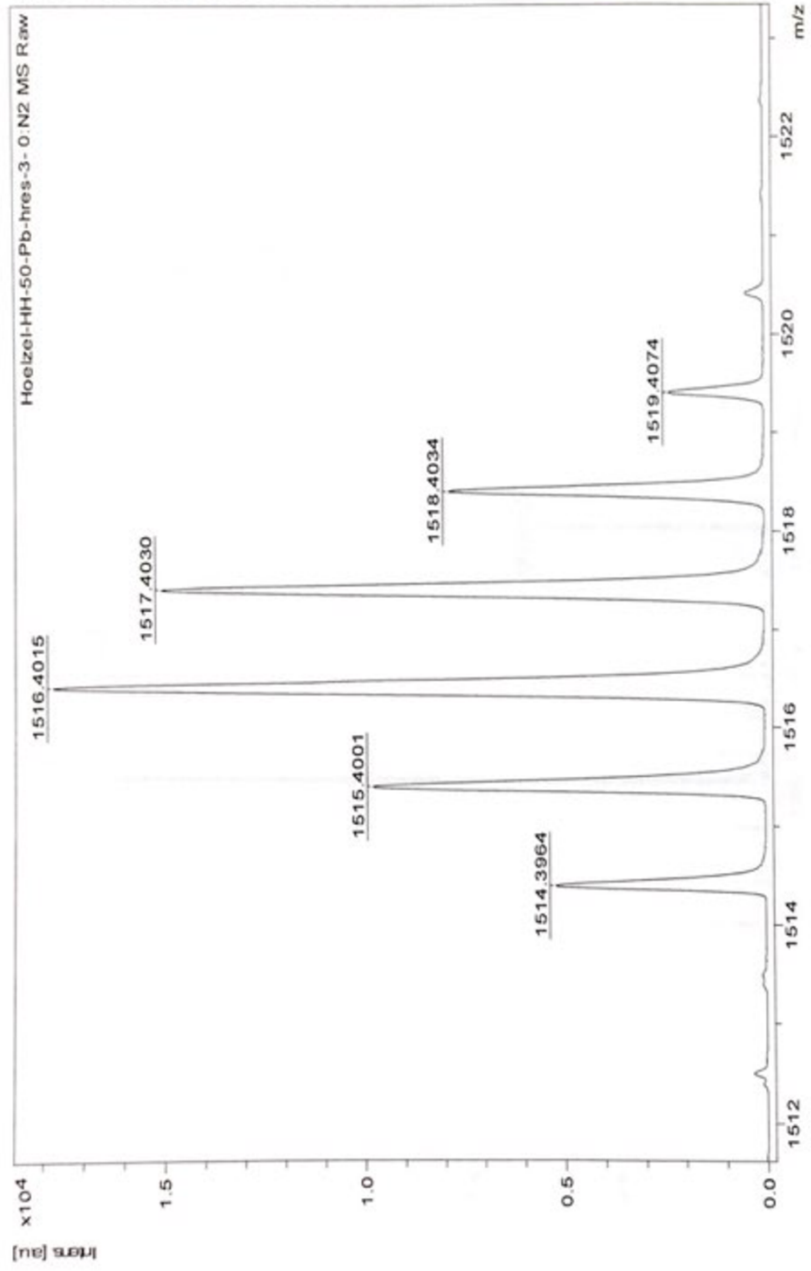

|              |             |
|--------------|-------------|
| Performed by | Viewed by   |
| Date / Sign  | Date / Sign |

Date of Acquisition 2019-08-08T14:15:16.270+02:00  
Acquisition method D:\Methods\flexControl\Methods\Don-70-2100.par  
Processing method  
File Name D:\Data\2019\lux-2019\Hoelzel-HH-50-Pb-hres-3-0\_N21

printed: 8/8/2019 2:16:17 PM

**Bruker Daltonics**

Supplementary Fig. 27. HRMS (MALDI, DCTB) of 1Pb.

#001374/HÖLZEL/HH50Pt/1mg/THF/1H/25 °C/CHP

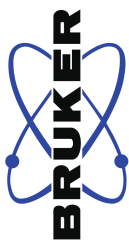

Current Data Parameters  
NAME S6h001374  
EXPNO 1  
PROCNO 1

F2 - Acquisition Parameters  
Date\_ 20220630  
Time\_ 11.09 h  
INSTRUM CAB AV4 600 MHz BASIC  
PROBHD Z150290\_0003 (1  
PULPROG 131072  
TD 131072  
SOLVENT THF  
NS 24  
DS 2  
SWH 12500.000 Hz  
FIDRES 0.190735 Hz  
AQ 5.2428799 sec  
RG 36  
DW 40.000 usec  
DE 18.29 usec  
TE 298.1 K  
D1 2.00000000 sec  
D11 4  
TD0 4  
SFOL 600.7036042 MHz  
NUCL 1H  
P0 3.33 usec  
F1 10.00 usec  
PLW1 18.79999924 W

F2 - Processing parameters  
SI 131072  
SF 600.7000199 MHz  
WDW EM  
SSB 0  
LB 0.30 Hz  
GB 0  
PC 1.00

9.220  
8.420  
8.406  
8.389  
8.374  
8.361  
8.347  
8.197  
8.184  
8.171  
6.722  
6.717  
6.711  
6.706  
6.556  
6.551  
6.546  
6.540

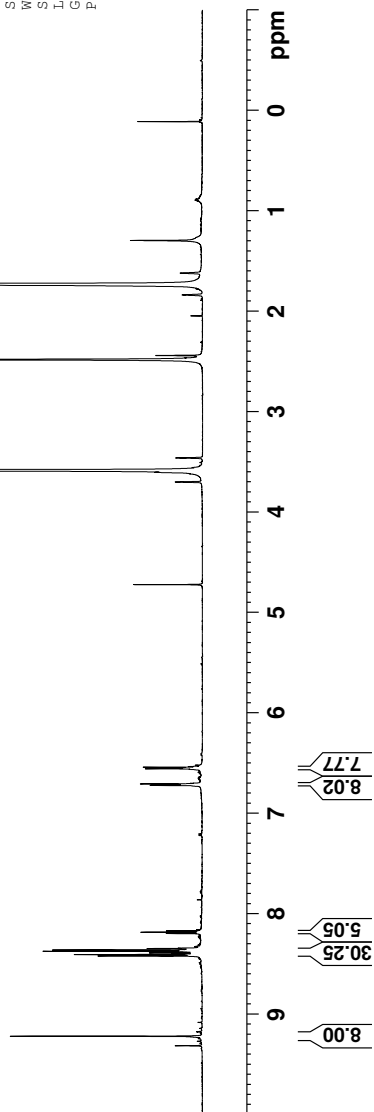

Supplementary Fig. 28. <sup>1</sup>H NMR (600 MHz, THF-D<sub>8</sub>, rt) of 1Pt.

#001374/HÖLZEL/HH50Pt/1mg/THF/13C{1H}/25°C/CHP

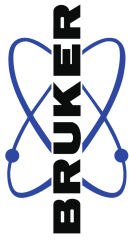

Current Data Parameters  
NAME S6h001374  
EXPNO 2  
PROCNO 1

F2 - Acquisition Parameters  
Date\_ 20220630  
Time\_ 12.25 h  
INSTRUM CAB AV4 600 MHz BASIC  
PROBHD Z150290\_0003 (4)  
PULPROG zgpg30  
TD 98304  
SOLVENT THF  
NS 768  
DS 4  
SWH 35714.285 Hz  
FIDRES 0.726609 Hz  
AQ 1.3762360 sec  
RG 101  
DW 14.000 usec  
DE 25.00 usec  
TE 298.1 K  
D1 4.00000000 sec  
D11 0.03000000 sec  
D0 6  
SFO1 151.0612398 MHz  
NUC1 13C  
P0 3.53 usec  
PL1 10.60 usec  
SFO2 19.89299965 W  
SFO2 600.7024028 MHz  
NUC2 1H  
CPDPRG[2] waltz16  
PCPD2 70.00 usec  
PLW2 18.79999824 W  
PLW1 0.38367000 W  
PLW13 0.19298001 W

F2 - Processing parameters  
SI 131072  
SF 151.0460052 MHz  
WDW EM  
SSB 0  
LB 1.00 Hz  
GB 0  
PC 1.40

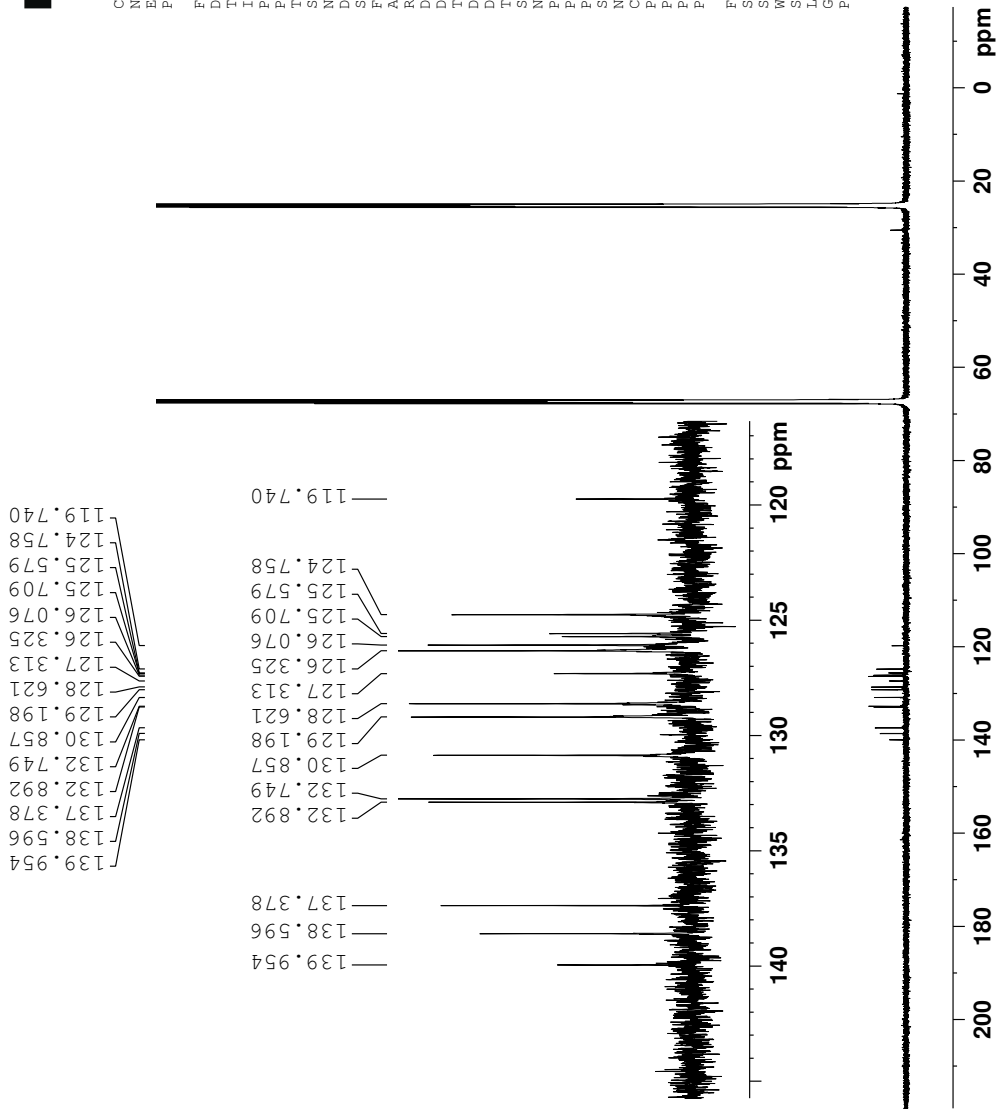

Supplementary Fig. 29. <sup>13</sup>C NMR (150 MHz, THF-D<sub>8</sub>, rt) of 1Pt.

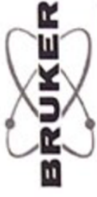

**Target**  
 Target type 0280781  
 Target serial number 1001585  
 Position K6

**Laser**  
 Laser beam attenuation 91  
 Laser beam focus 34  
 Laser repetition rate 2000 Hz  
 Number of shots 500

**Spectrometer**  
 positive voltage polarity POS  
 P/E delay 140 ns  
 Ion source voltage 1 20 kV  
 Ion source voltage 2 17.65 kV  
 Lens voltage 8.2 kV  
 Linear detector voltage 2.95 kV  
 Deflection on Deflection mass

**MSMS parent mass**  
 LIFT voltage 1  
 LIFT voltage 2  
 LIFT 1 Pulser time depending on the parent mass  
 LIFT 2 Pulser time

**Reflector voltage 1** 21.1 kV  
**Reflector voltage 2** 10.85 kV  
**Reflector detector voltage** 2.367 kV

**Instrument**  
 ultraflexTOF/TOF  
 Instrument type 8276601.00592  
 Instrument serial UTX-00592  
 Name of computer Operator ID or name Don  
 flexControl version flexControl 3.4.135.0  
 flexAnalysis version 3.4.76.0

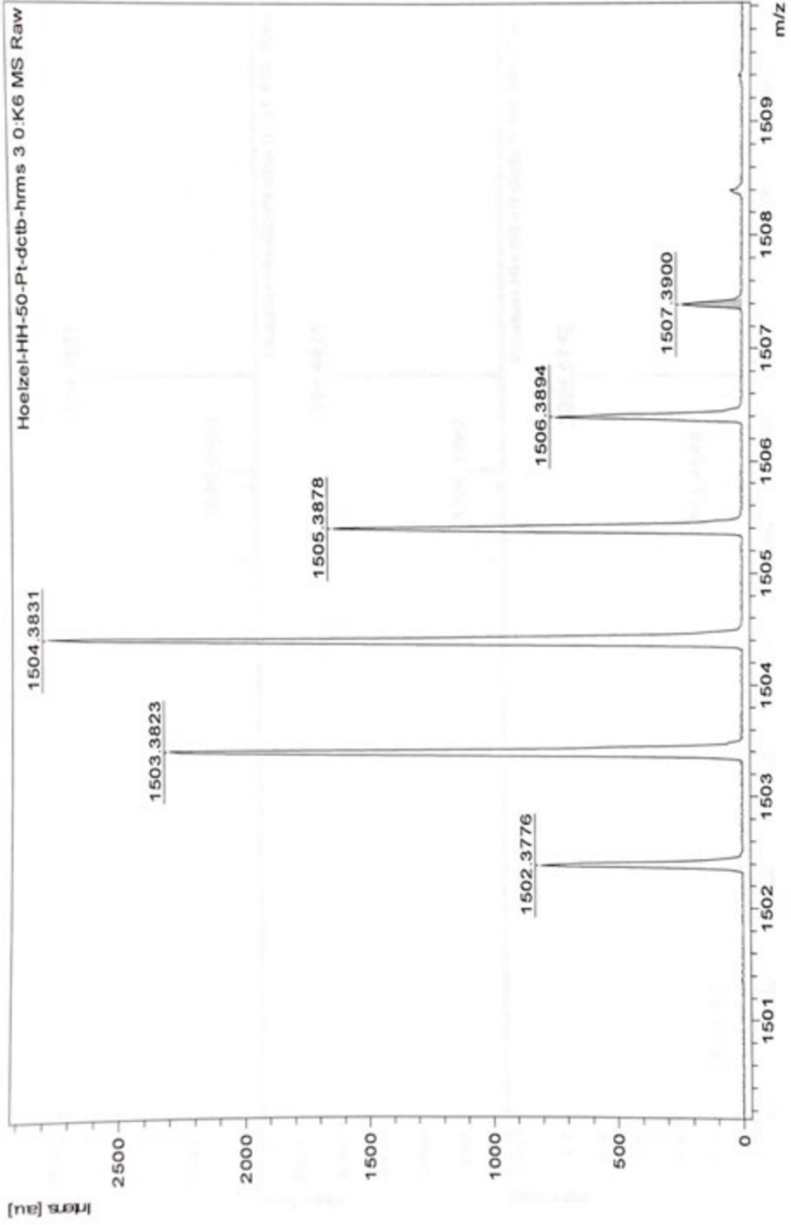

Date of Acquisition 2019-08-08T15:50:27.088+02:00 printed: 8/8/2019 3:50:54 PM  
 Acquisition method D:\Methods\flexControlMethods\Don-70-2100.par  
 Processing method  
 File Name D:\Data\2019\Jux-2019\Hoelzel-HH-50-Pt-dctb-hrms310\_K61

|              |             |
|--------------|-------------|
| Performed by | Viewed by   |
| Date / Sign  | Date / Sign |

**Bruker Daltonics**

Supplementary Fig. 30. HRMS (MALDI, DCTB) of 1Pt.

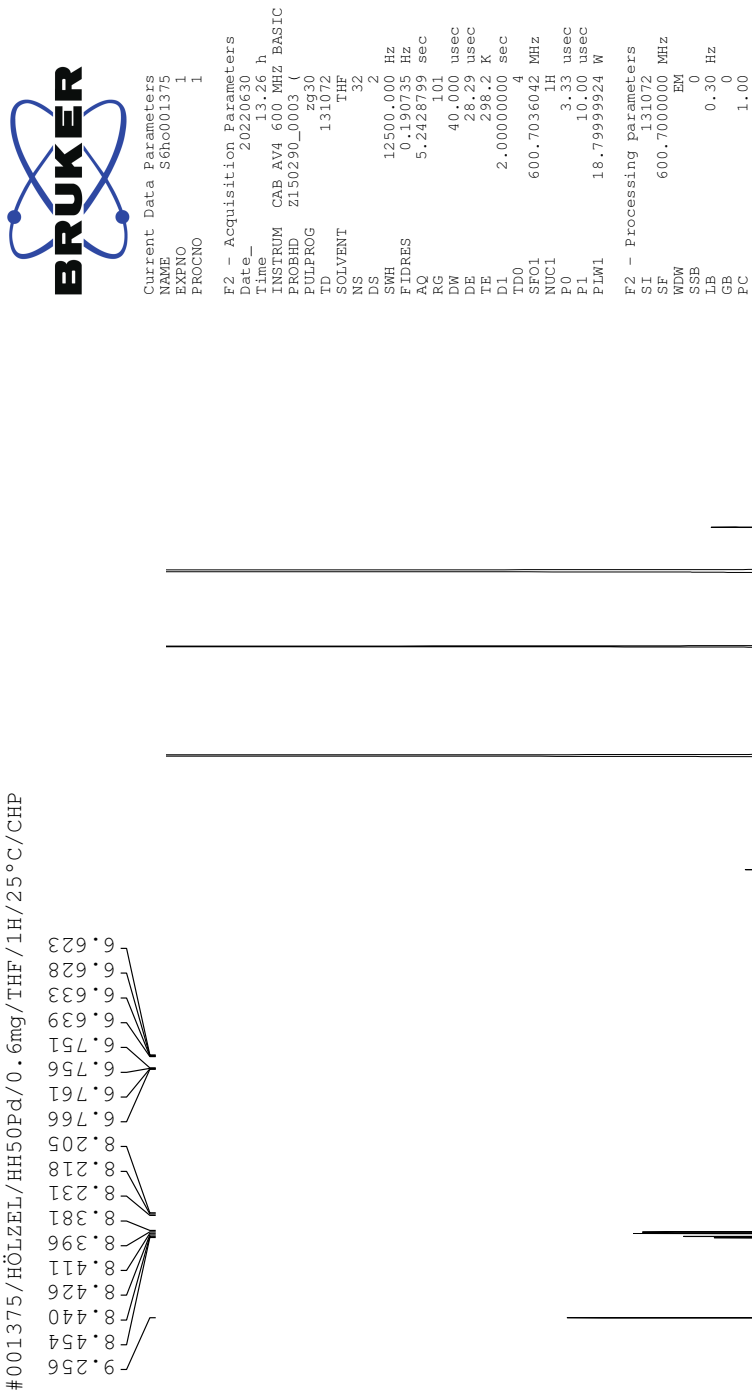

Supplementary Fig. 31. <sup>1</sup>H NMR (600 MHz, THF-D<sub>8</sub>, rt) of 1Pd.



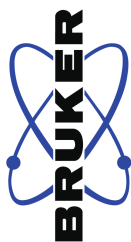

Current Data Parameters  
NAME S6hc001375  
EXPNO 2  
PROCNO 1

F2 - Acquisition Parameters  
Date\_ 20220701  
Time 10.11 h  
INSTRUM CAB AV4 600 MHz BASIC  
PROBHD Z150290\_0003 (zgpg30)  
PULPROG 98304  
TD 98304  
SOLVENT THF  
NS 13704  
DS 4  
SWH 35714.285 Hz  
FIDRES 0.726609 Hz  
AQ 1.3762560 sec  
RG 101  
DW 14.000 usec  
DE 25.00 usec  
TE 298.2 K  
D1 4.0000000 sec  
D11 0.0300000 sec  
TD0 128  
SF01 151.0612398 MHz  
NUC1 13C  
P0 3.53 usec  
P1 10.60 usec  
PLW1 19.89299965 W  
SFO2 600.7024028 MHz  
NUC2 1H  
CPDPRG2 waltz16  
PCPD2 70.00 usec  
PLM2 18.79999924 W  
PLW2 0.38367000 W  
PLM3 0.00000000 W  
PLW3 0.19298001 W  
F2 - Processing Parameters  
SI 131072  
SF 151.0460049 MHz  
WDW EM  
SSB 0  
LB 1.00 Hz  
GB 0  
PC 1.40

#001375/HÖLZEL/HH50Pd/0.6mg/THF/13C{1H}/25°C/CHP

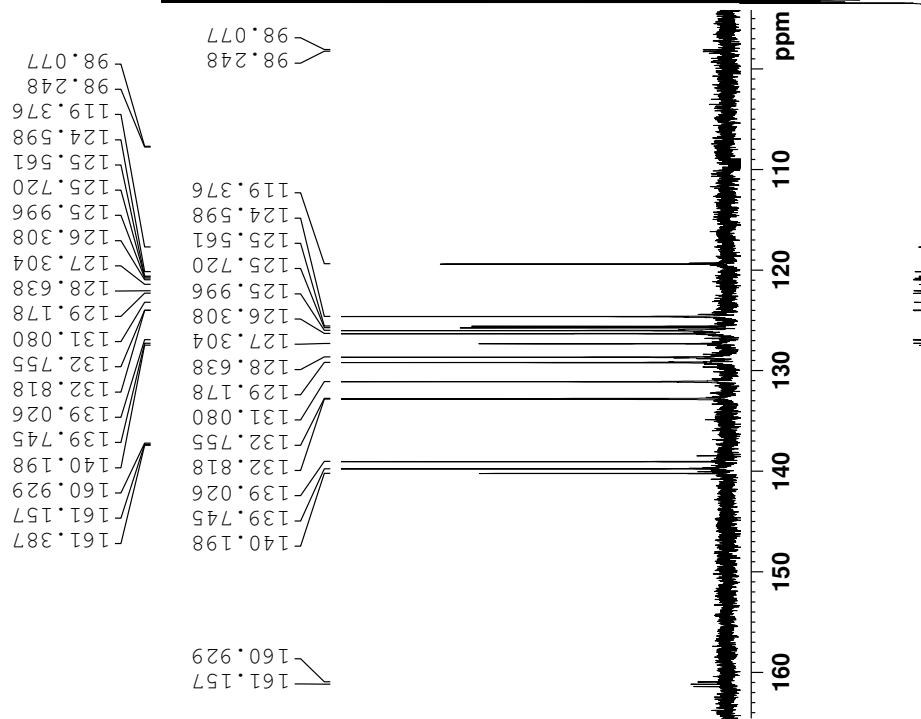

Supplementary Fig. 32. <sup>13</sup>C NMR (150 MHz, THF-D<sub>8</sub>, rt) of 1Pd.

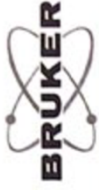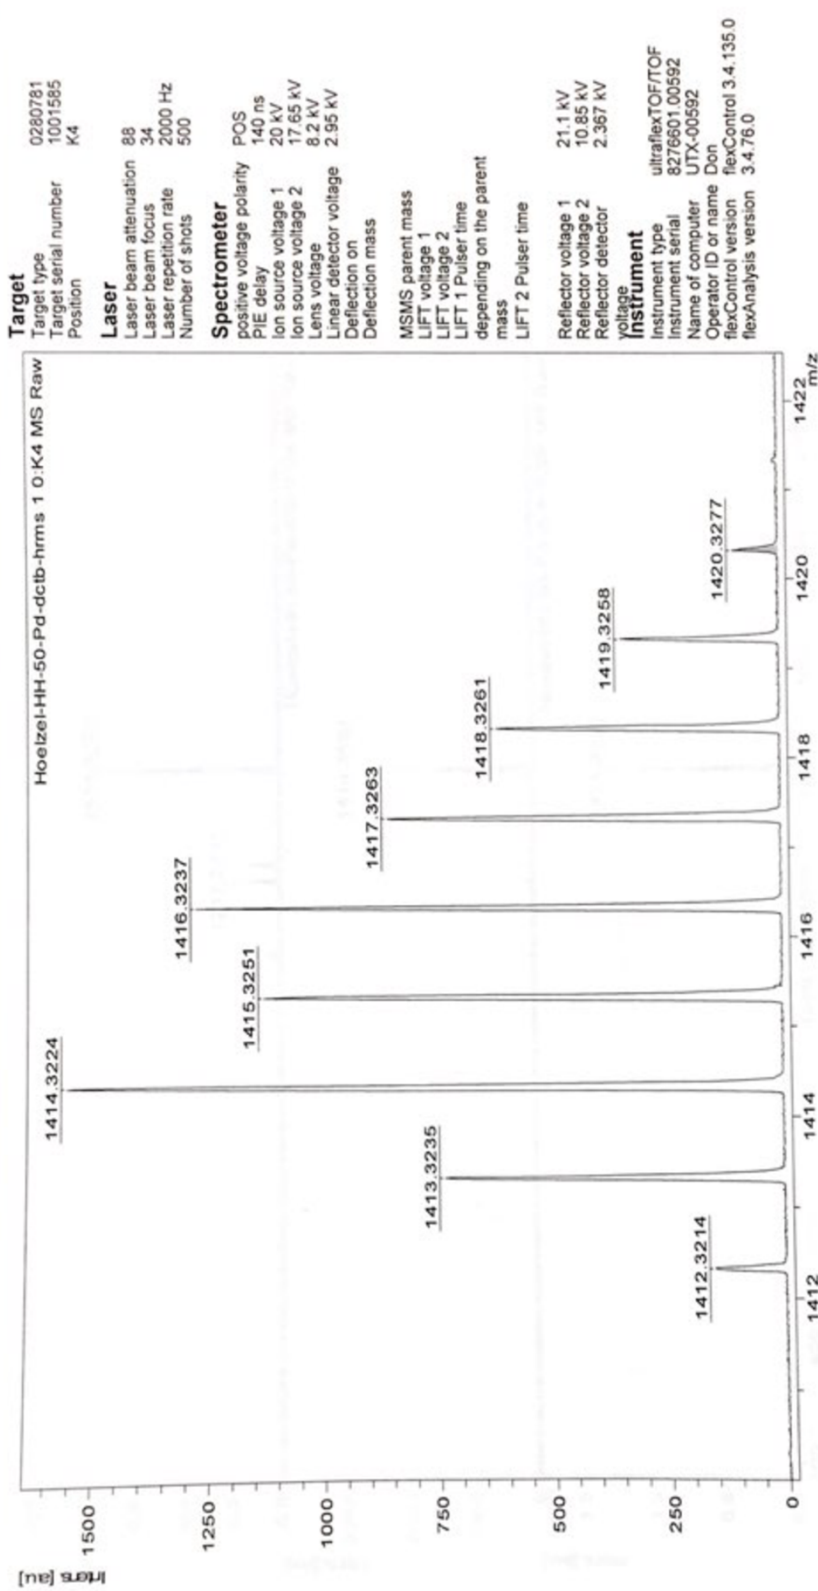

|              |             |
|--------------|-------------|
| Performed by | Viewed by   |
| Date / Sign  | Date / Sign |

printed: 8/8/2019 3:39:38 PM

Date of Acquisition 2019-08-08T15:38:36.119+02:00  
 Acquisition method D:\Methods\flexControl\Methods\Don-70-2100.par  
 Processing method  
 File Name D:\Data\2019\Jux-2019\Hoelzel-HH-50-Pd-dctb-hrms 1\0\_K41

**Bruker Daltonics**

Supplementary Fig. 33. HRMS (MALDI, DCTB) of 1Pd.

001372/Hörlzel/HH50Ni/1mg/THF/1H/25 °C/Maid

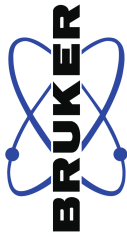

Current Data Parameters  
NAME S6ho001372  
EXPNO 1  
PROCNO 1  
F2 - Acquisition Parameters  
Date\_ 20220629  
Time 9.27 h  
INSTRUM CAB AV4 600 MHz BASIC  
PROBHD Z150290\_0003 (Z150290)  
PULPROG zg30  
TD 131072  
SOLVENT THF  
NS 32  
DS 2  
SWH 12500.000 Hz  
FIDRES 0.190735 Hz  
AQ 5.2428799 sec  
RG 36  
DW 40.000 usec  
DE 18.29 usec  
TE 298.1 K  
D1 2.00000000 sec  
TD0 4  
SFO1 600.7036042 MHz  
NUC1 1H  
P1 3.33 usec  
P2 10.00 usec  
PLW1 18.79999924 W  
F2 - Processing parameters  
SI 131072  
SF 600.7000201 MHz  
WDW EM  
SSB 0  
LB 0.30 Hz  
GB 0  
PC 1.00

8.392  
8.379  
8.366  
8.326  
8.323  
8.307  
8.304  
8.174  
8.161  
8.148  
6.720  
6.715  
6.709  
6.704  
6.626  
6.621  
6.616  
6.610

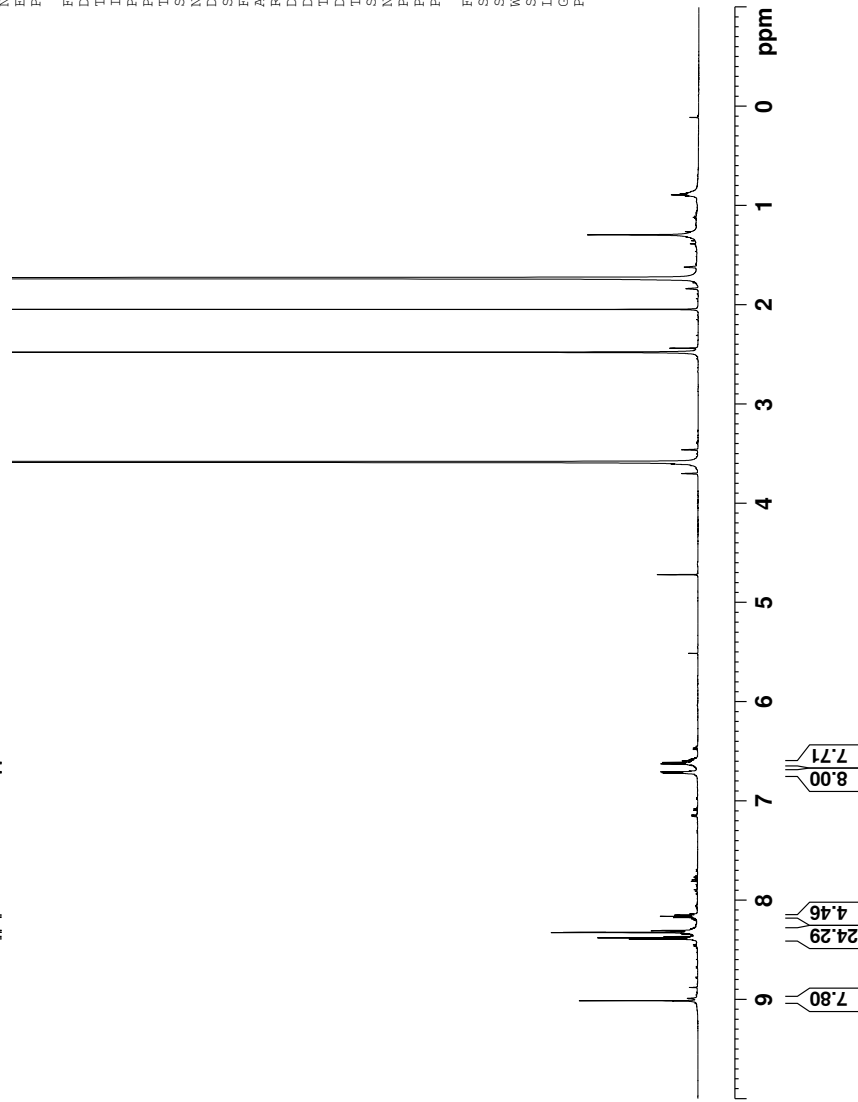

Supplementary Fig. 34. <sup>1</sup>H NMR (600 MHz, THF-D<sub>8</sub>, rt) of 1Ni.

001372/Hölzel/HH50Ni/1mg/THF/13C{1H}/25°C/Maid

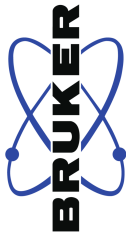

Current Data Parameters  
NAME 56hc001372  
EXPNO 2  
PROCNO 1

F2 - Acquisition Parameters  
Date\_ 20220629  
Time 11.46 h  
INSTRUM CAB AV4 600 MHz BASIC  
PROBHD Z150290.0003 (zggp30  
PULPROG zgpg30  
TD 65536  
SOLVENT THF  
NS 2336  
DS 4  
SWH 35714.285 Hz  
FIDRES 1.089913 Hz  
AQ 0.9175040 sec  
RG 101  
DW 14.000 usec  
DE 25.00 usec  
TE 298.2 K  
D1 2.00000000 sec  
D11 0.03000000 sec  
TD0 12800  
SFO1 151.0612398 MHz  
NUC1 13C  
P0 3.53 usec  
P1 10.60 usec  
PLW1 19.89299965 W  
SFO2 600.7024028 MHz  
NUC2 1H  
waltz16  
CPDPRG2  
PCPD2 70.00 usec  
PLW2 18.79999924 W  
PLW12 0.38367000 W  
PLW13 0.19298001 W  
F2 - Processing parameters  
SI 131072  
SF 151.0460051 MHz  
WDW EM  
SSB 0  
LB 1.00 Hz  
GB 0  
PC 1.40

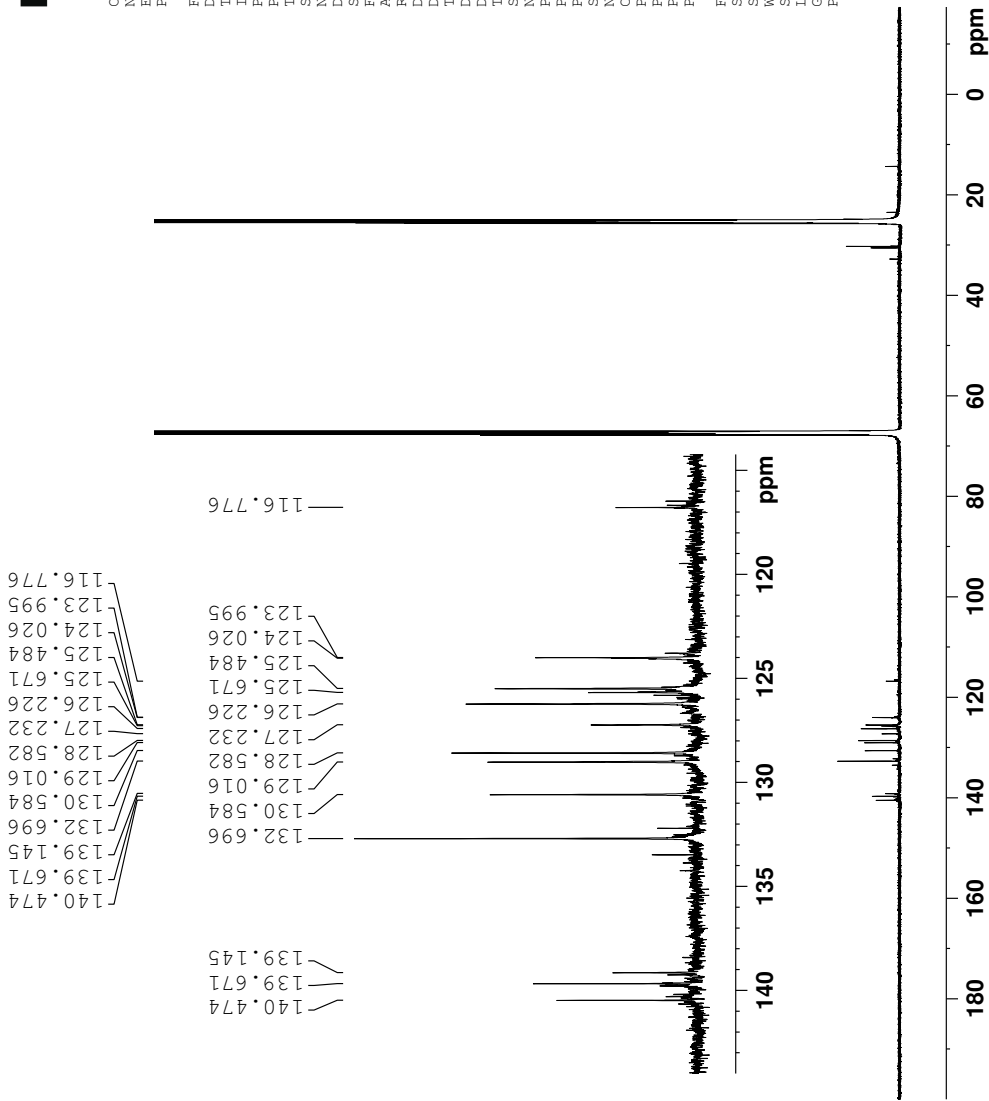

Supplementary Fig. 35. <sup>13</sup>C NMR (150 MHz, THF-D<sub>8</sub>, rt) of 1Ni.

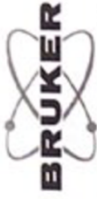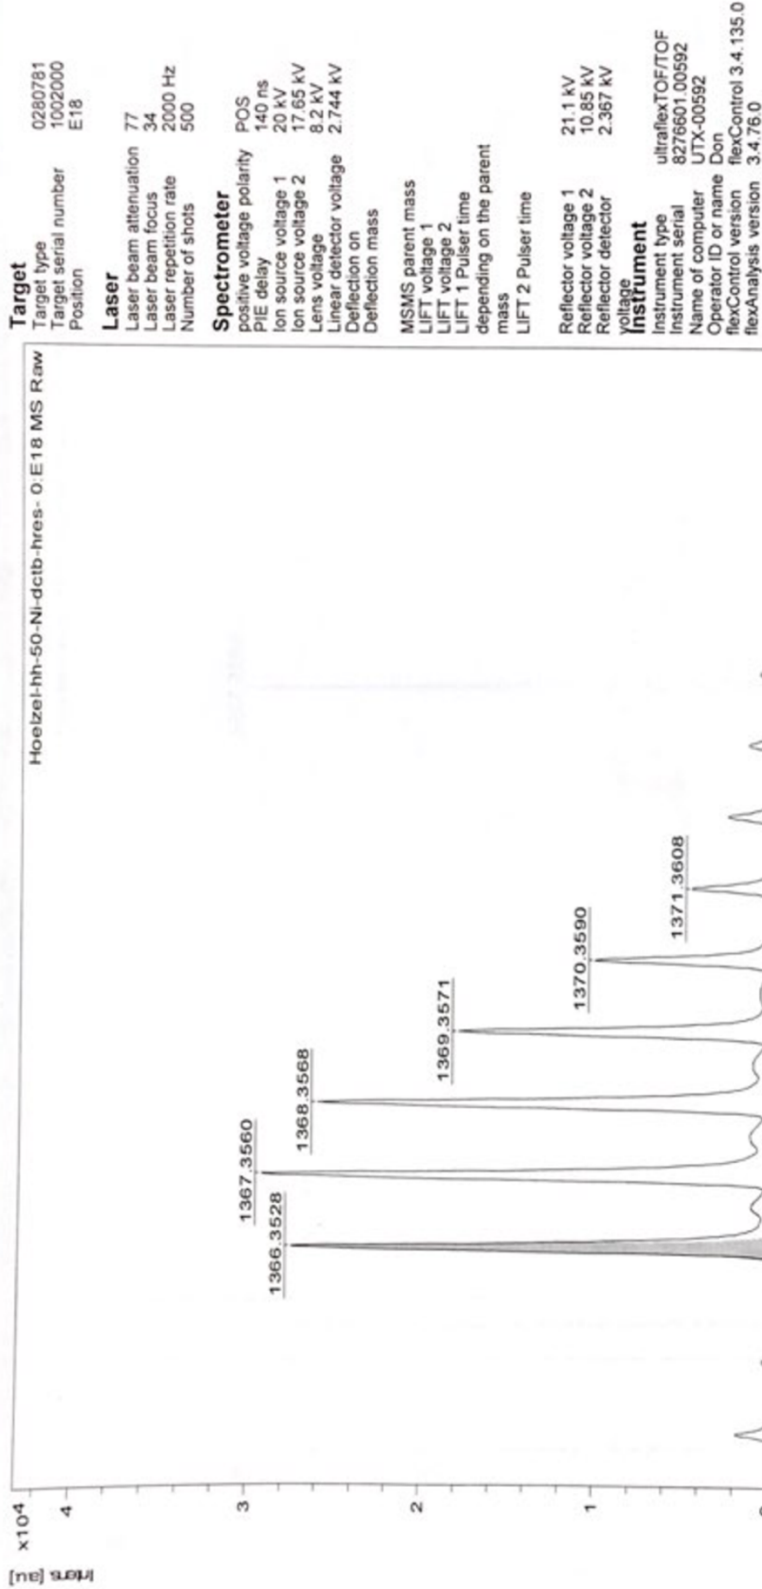

Broker Daltonics

Supplementary Fig. 36. HRMS (MALDI, DCTB) of 1Ni.

## 6 Supplementary References

1. Jablonski, A., Salvat, F., Powell, C. J. & Lee, A. Y. *NIST Electron Elastic-Scattering Cross-Section Database Version 4.0, NIST Standard Reference Database Number 64, National Institute of Standards and Technology.* (2016).
2. Egerton, R. F., Li, P. & Malac, M. Radiation damage in the TEM and SEM. *Micron* **35**, 399–409 (2004).
3. Susi, T., Meyer, J. C. & Kotakoski, J. Quantifying transmission electron microscopy irradiation effects using two-dimensional materials. *Nat. Rev. Phys.* **1**, 397–405 (2019).
4. Chamberlain, T. W. *et al.* Isotope Substitution Extends the Lifetime of Organic Molecules in Transmission Electron Microscopy. *Small* **11**, 622–629 (2015).
5. Brydson, R. *Electron Energy Loss Spectroscopy.* (Taylor & Francis, 2001). doi:10.1201/9781003076858-1.
6. Kim, Y.-K., Santos, J. P. & Parente, F. Extension of the binary-encounter-dipole model to relativistic incident electrons. *Phys. Rev. A* **62**, 052710 (2000).
7. Avillez, M. A. de *et al.* Relativistic electron impact ionization cross sections of carbon ions and application to an optically thin plasma. *Astron. Astrophys.* **631**, A42 (2019).
8. Chamberlain, T. W. *et al.* Isotope Substitution Extends the Lifetime of Organic Molecules in Transmission Electron Microscopy. *Small* **13**, 1–1 (2017).
